# Supplementary material for: Transcriptome-Wide N6-Methyladenosine Alternations in Pulmonary Arteries of Monocrotaline-Induced Pulmonary Arterial Hypertension in Rats and Novel Therapeutic Targets
Source: MDPI journal article supplement (doi:10.3390/biomedicines12020364), 2024-02-04
Supplement: s1 [file s1]

## **SUPPLEMENTAL INFORMATION**

### **Transcriptome-Wide N6-Methyladenosine Alternations in Pulmonary Arteries of Monocrotaline-Induced Pulmonary Arterial Hypertension in Rats and Novel Therapeutic Targets**

Yilu Feng 1,2,3, Zaixin Yu 1, Mi Tang 4, Jiang Li 2,3, Baohua Peng 1,

Mukamengjiang Juaiti 1, Yiyang Tang 1, Benhui Liang 1, Mingqi Ouyang 2,3,

Qingqing Liu 5 and Jie Song 2,3,\*

#### **Inventory of Supplemental Information**

**Supplemental Figure S2: Linked to Figure 2**

**Supplemental Figure S3: Linked to Figure 4**

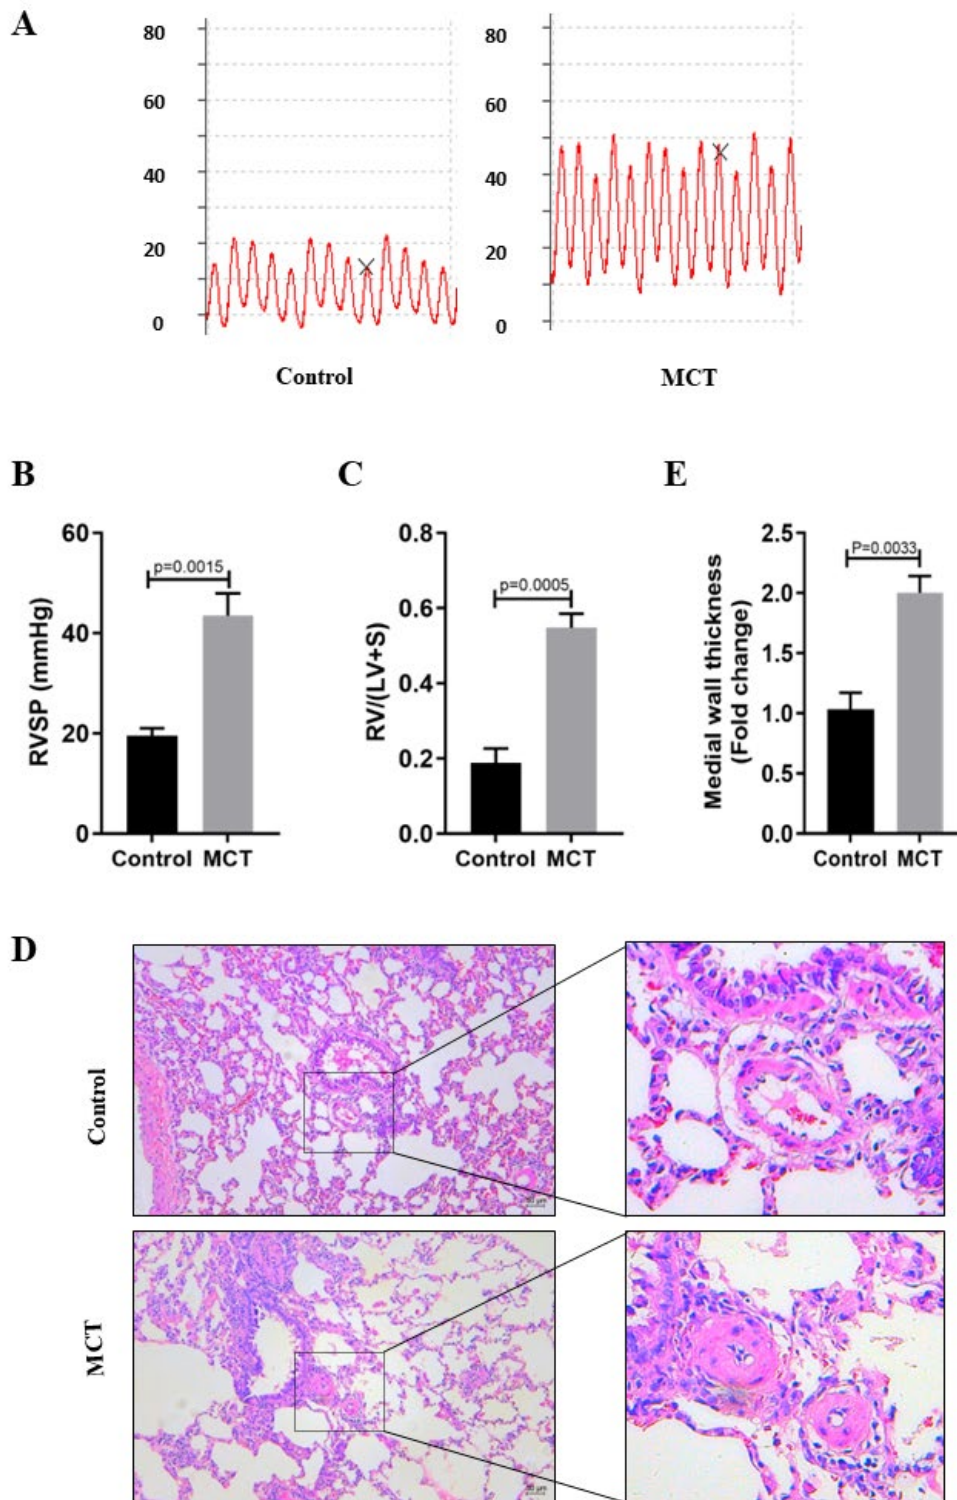

**Supplemental Figure S1.** PAH rat models validation. **(A-C)** Hemodynamic analyses of the control and the MCT-treatment groups.  $n=6$  each. RVSP, right ventricular systolic pressure; RV/LV+S, an index of RV hypertrophy (Fulton index). **(D and E)** Hematoxylin and eosin staining of pulmonary artery in lung tissues ( $n = 6$  each). Bar = 100  $\mu\text{m}$  (left panel). Enlarged pulmonary artery (right panel).

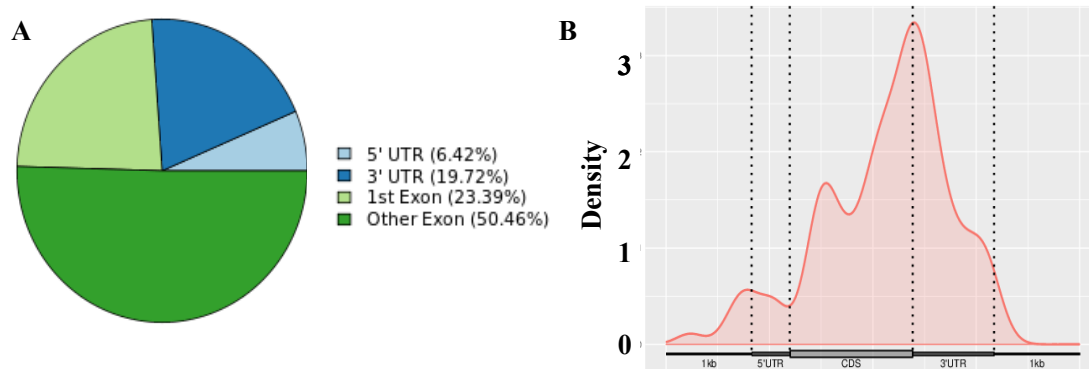

**Supplemental Figure S2.** Differential m<sup>6</sup>A analysis in PAH. (A) Pie charts showing the percentage of m<sup>6</sup>A peaks in four non-overlapping segments of transcripts. (B) Density curve showing the distribution of m<sup>6</sup>A peaks across the transcripts. The transcript is divided into three parts, namely 5' UTR, CDS, and 3' UTR.

**A**

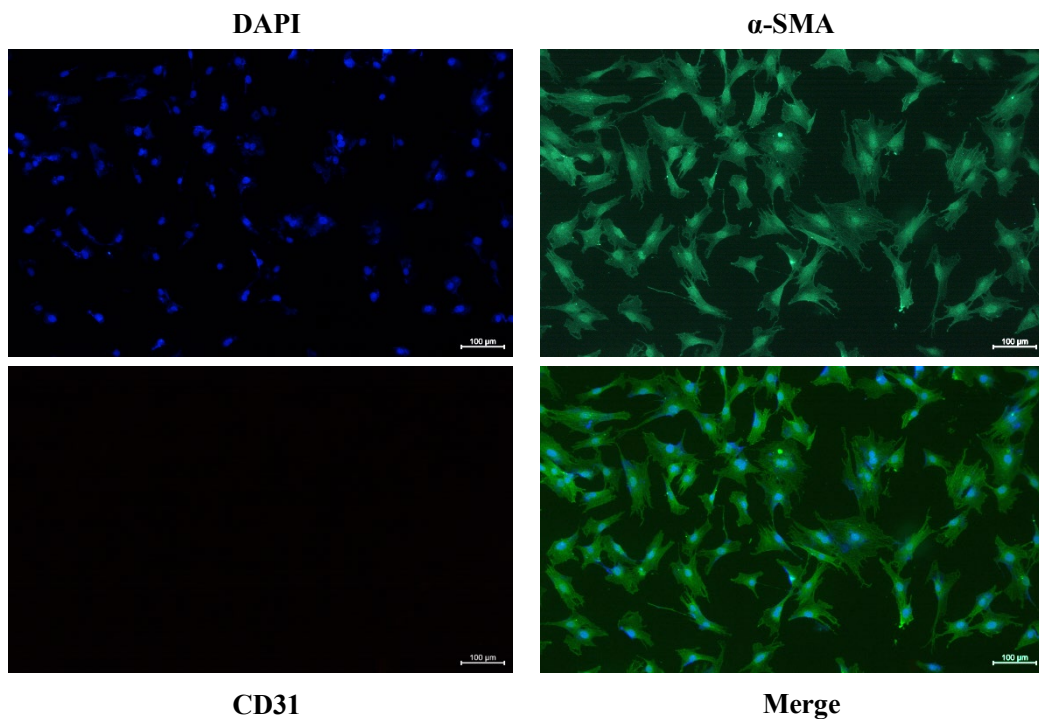

**B**

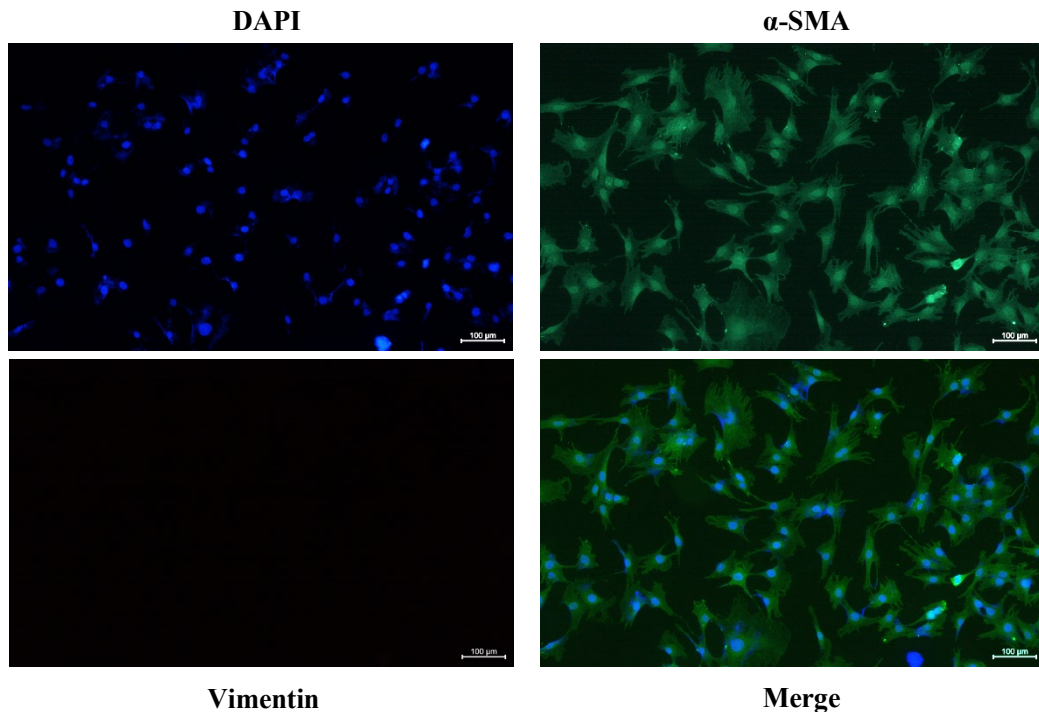

**Supplemental Figure S3.** PPI networks establishment and candidate genes identification. (A and B) Identify primary rat PASMCs. DAPI (blue),  $\alpha$ -SMA (green), CD31 and Vimentin (red).

Supplemental Table S8. EdU cell numbers.

| Biology repeat number | Cell group     | Edu positive cell numbers | All cell numbers | Ratio (%) |
|-----------------------|----------------|---------------------------|------------------|-----------|
| 1                     | siNC           | 20                        | 155              | 12.9      |
|                       | siLRPPRC       | 43                        | 254              | 16.9      |
|                       | PDGF+siNC      | 52                        | 212              | 24.5      |
|                       | PDGF+ siLRPPRC | 56                        | 187              | 30.0      |
| 2                     | siNC           | 18                        | 134              | 13.4      |
|                       | siLRPPRC       | 39                        | 242              | 16.1      |
|                       | PDGF+siNC      | 59                        | 267              | 22.1      |
|                       | PDGF+ siLRPPRC | 67                        | 215              | 31.2      |
| 3                     | siNC           | 12                        | 115              | 10.4      |
|                       | siLRPPRC       | 41                        | 240              | 17.1      |
|                       | PDGF+siNC      | 67                        | 290              | 23.1      |
|                       | PDGF+ siLRPPRC | 76                        | 251              | 30.3      |
