# Supplementary material for: Transcriptome-Wide N6-Methyladenosine Alternations in Pulmonary Arteries of Monocrotaline-Induced Pulmonary Arterial Hypertension in Rats and Novel Therapeutic Targets
Source: Biomedicines. 2024 Feb 4;12(2):364. doi: 10.3390/biomedicines12020364 (PMC10886831; doi:10.3390/biomedicines12020364)
Supplement: Supplementary file 1 [file biomedicines-12-00364-s001.zip]

Archive with 8 entries (8 files):
- Supplement Table S1.xlsx
- Supplement Table S2.xlsx
- Supplement Table S3.xlsx
- SUPPLEMENTAL INFORMATION.pdf
- Supplemental Table S4.xlsx
- Supplemental Table S5.xlsx
- Supplemental Table S6.xlsx
- Supplemental Table S7.xlsx
