# Supplementary material for: Transcriptome-Wide N6-Methyladenosine Alternations in Pulmonary Arteries of Monocrotaline-Induced Pulmonary Arterial Hypertension in Rats and Novel Therapeutic Targets
Source: Biomedicines. 2024 Feb 4;12(2):364. doi: 10.3390/biomedicines12020364 (PMC10886831; doi:10.3390/biomedicines12020364)
Supplement: Supplementary file 1 [file biomedicines-12-00364-s001.zip › Supplement Table S1.xlsx]

## Sheet: Sheet1
name	transcriptId	lg.p	lg.fdr	fold_enrchment	diff.lg.fdr	diff.lg.p	diff.log2.fc	annotation
Anapc15	XM_006229869.3	-64.2	-62.6	5.9	-6.29	-7.45	1.33	3' UTR
Stx4	XM_006230346.3	-50.7	-49.2	3.46	-11.6	-13.2	1.16	3' UTR
Ppp2r2d	NM_144746.2	-27.6	-26.2	4.71	-5.81	-6.91	2.36	5' UTR
Ganab	XM_006230977.3	-273	-271	11.4	-6.77	-7.98	-1.21	3' UTR
Mpeg1	XM_008760261.1	-73.8	-72.2	9.02	-7.48	-8.77	4.33	3' UTR
Kazald1	NM_001033064.1	-14.4	-13.1	2.36	-4.28	-5.2	2.06	3' UTR
Cnot3	NM_001107471.2	-52.4	-50.9	3.04	-14.4	-16.2	-0.969	Exon (NM_001107471.2/Cnot3, exon 11 of 18)
Arhgap35	NM_001271132.1	-17.3	-16	2.36	-6.18	-7.32	1.73	Exon (NM_001271132.1/Arhgap35, exon 6 of 7)
Cd3eap	NM_001109416.1	-340	#NAME?	10.8	-15.3	-17.1	1.25	Exon (NM_001109416.1/Cd3eap, exon 1 of 3)
LOC688869	NM_001145273.1	-55.4	-53.8	2.46	-8.97	-10.4	-1.25	Exon (NM_001145273.1/LOC688869, exon 1 of 3)
Uba2	NM_001100579.1	-7.53	-6.35	1.9	-4.19	-5.09	-1.52	Exon (NM_001100579.1/Uba2, exon 2 of 16)
Chd2	XM_006229369.3	-99	-97.3	4.6	-9.21	-10.6	-1.24	Exon (XM_006229369.3/Chd2, exon 1 of 38)
Eed	XM_006229664.2	-420	#NAME?	5.8	-12.1	-13.7	0.844	Exon (XM_006229664.2/Eed, exon 10 of 12)
Mki67	NM_001271366.1	-313	-311	13.5	-5.91	-7.03	1.39	Exon (NM_001271366.1/Mki67, exon 1 of 15)
Mki67	NM_001271366.1	-31.3	-29.8	4	-5.57	-6.64	2.05	Exon (NM_001271366.1/Mki67, exon 3 of 15)
Hras	NM_001098241.1	-85.6	-83.9	2.29	-18.7	-20.8	1.22	Exon (NM_001098241.1/Hras, exon 3 of 5)
Ppfia1	NM_001106320.2	-66.2	-64.6	3.1	-6.85	-8.07	0.84	Exon (NM_001106320.2/Ppfia1, exon 16 of 26)
Ehbp1l1	NM_001025117.2	-145	-143	2.81	-7.37	-8.64	-0.604	Exon (NM_001129997.1/Ehbp1l1, exon 12 of 20)
Sdhaf2	XM_017589442.1	-101	-99.2	4.75	-7.36	-8.62	1.1	5' UTR
Rab11fip2	NM_001107447.2	-19.4	-18.1	3.75	-5.18	-6.21	1.78	Exon (NM_001107447.2/Rab11fip2, exon 4 of 5)
Rictor	XM_008760807.1	-22	-20.6	2.46	-5.35	-6.39	1.34	3' UTR
Postn	XM_006232335.3	-618	#NAME?	2.55	-21	-23.1	1.74	Exon (XM_006232335.3/Postn, exon 13 of 23)
Postn	XM_006232335.3	-1970	#NAME?	5.34	-9.87	-11.3	0.66	3' UTR
Spg20	NM_001106433.2	-27.8	-26.4	2.5	-5.48	-6.54	-1.18	5' UTR
Spg20	NM_001106433.2	-49.5	-48	3.38	-11.1	-12.6	1.68	Exon (NM_001106433.2/Spg20, exon 4 of 9)
RGD1565775	XM_342277.7	-7.91	-6.73	3.03	-3.62	-4.44	2.24	3' UTR
S100a4	NM_012618.2	-277	-275	3.21	-17.2	-19.2	0.611	3' UTR
Sort1	XM_006233194.3	-11.8	-10.6	2.04	-5.5	-6.57	-1.81	3' UTR
Arhgap29	XM_006233240.3	-21.1	-19.7	2.01	-7.47	-8.75	1.34	Exon (XM_006233240.3/Arhgap29, exon 23 of 23)
Cenpe	XM_006233352.2	-37.5	-36	4.59	-8.12	-9.45	3.01	Exon (XM_006233352.2/Cenpe, exon 31 of 46)
Tspan5	NM_001004090.2	-34.5	-33	3.5	-6.49	-7.67	-1.67	3' UTR
Zzz3	XM_006233491.3	-42.1	-40.6	3.73	-8.82	-10.2	0.989	Exon (XM_006233491.3/Zzz3, exon 4 of 14)
Vcan	NM_001170558.1	-221	-219	10.5	-10.1	-11.6	1.57	Exon (NM_001170558.1/Vcan, exon 10 of 20)
Bdp1	XM_017590701.1	-31	-29.6	1.79	-8.77	-10.2	-0.894	Exon (XM_017590701.1/Bdp1, exon 30 of 39)
Pgrmc2	NM_001008374.1	-824	#NAME?	8.68	-14.2	-16	0.765	Exon (NM_001008374.1/Pgrmc2, exon 1 of 3)
Nbea	XM_008761027.2	-23.8	-22.4	3.17	-9.92	-11.4	-2.32	Exon (XM_008761027.2/Nbea, exon 29 of 59)
Ints3	XM_342288.7	-158	-156	9.31	-5.13	-6.15	-1.08	Exon (XM_342288.7/Ints3, exon 28 of 30)
Plekho1	NM_001025119.1	-51.3	-49.8	2.78	-7.17	-8.41	1.08	Exon (NM_001025119.1/Plekho1, exon 1 of 6)
Rbm15	XM_003749380.4	-83.4	-81.7	4.28	-6.88	-8.09	1.11	Exon (XM_003749380.4/Rbm15, exon 2 of 2)
Aimp1	NM_053757.1	-90	-88.3	3.94	-5.05	-6.06	-0.992	Exon (NM_053757.1/Aimp1, exon 3 of 7)
Dnajc2	XM_008762628.2	-44.4	-42.9	3.38	-6.77	-7.98	1.24	Exon (XM_008762628.2/Dnajc2, exon 3 of 18)
Krcc1	XM_006236636.3	-2490	#NAME?	10.2	-30.4	-32.8	0.703	3' UTR
Chmp3	NM_172331.1	-434	#NAME?	3.92	-40.3	-42.9	0.619	5' UTR
Eva1a	XM_008763027.2	-15.3	-14	3.74	-7.34	-8.6	4.24	3' UTR
Kdm5a	NM_001277178.1	-109	-108	2.57	-9.57	-11	0.803	Exon (NM_001277178.1/Kdm5a, exon 5 of 12)
Foxj2	XM_006237311.3	-25.2	-23.8	2.47	-5.37	-6.42	1.31	Exon (XM_006237311.3/Foxj2, exon 6 of 12)
Cd163	XM_006237352.3	-20.7	-19.4	4.03	-6.28	-7.44	2.76	3' UTR
Slc37a3	XM_017592976.1	-154	-152	3.46	-20.6	-22.6	1.05	Exon (XM_017592976.1/Slc37a3, exon 1 of 15)
Arhgap25	NM_001109247.1	-97.8	-96.2	11	-4.15	-5.06	2.47	Exon (NM_001109247.1/Arhgap25, exon 11 of 11)
Tmf1	NM_053671.2	-194	-193	14.3	-6.94	-8.16	1.1	Exon (NM_053671.2/Tmf1, exon 1 of 17)
Foxp1	XM_006236956.2	-50.1	-48.5	5.6	-11.2	-12.8	2.14	Exon (XM_006236956.2/Foxp1, exon 1 of 15)
Foxp1	XM_006236956.2	-443	#NAME?	7.84	-30.2	-32.5	0.791	Exon (XM_006236956.2/Foxp1, exon 1 of 15)
Bhlhe41	XM_002729454.6	-50	-48.4	3.76	-10.5	-12	1.85	Exon (XM_002729454.6/Bhlhe41, exon 4 of 6)
Lrrc8a	NM_001024782.1	-25.3	-23.9	4.75	-20.1	-22.2	-2.49	5' UTR
Lrrc8a	XM_017591842.1	-36.3	-34.8	1.92	-11.1	-12.7	1.14	Exon (XM_017591842.1/Lrrc8a, exon 3 of 4)
Dync1i2	XM_017591432.1	-565	#NAME?	4.64	-15.5	-17.3	0.631	5' UTR
Mga	XM_008762120.2	-42.7	-41.2	5.1	-5.25	-6.29	1.12	3' UTR
Stard9	XM_001080099.6	-19.5	-18.1	2.53	-18.9	-20.9	2.77	Exon (XM_001080099.6/Stard9, exon 23 of 27)
Map1a	XM_006234826.3	-49.8	-48.3	4.77	-4.84	-5.83	1.53	Exon (XM_006234826.3/Map1a, exon 5 of 7)
Casc4	NM_001271283.1	-33.1	-31.6	4.28	-11.7	-13.3	0.842	Exon (NM_001271283.1/Casc4, exon 1 of 11)
B2m	NM_012512.2	-183	-181	2.22	-9.14	-10.6	0.638	3' UTR
Chmp4b	XM_017592343.1	-720	#NAME?	6.24	-26.9	-29.2	-0.635	5' UTR
Cep250	XM_017592255.1	-69.4	-67.8	7.97	-8.01	-9.33	-1.96	Exon (XM_017592255.1/Cep250, exon 26 of 28)
Baz2b	XM_017591862.1	-81.1	-79.5	4.66	-11.3	-12.9	1.23	Exon (XM_017591862.1/Baz2b, exon 28 of 37)
Zdhhc5	XM_017591897.1	-15	-13.7	2.95	-4.87	-5.87	2.21	Exon (XM_017591897.1/Zdhhc5, exon 1 of 14)
Atg13	NM_001271212.1	-111	-110	2.83	-5.16	-6.18	-0.623	Exon (NM_001271212.1/Atg13, exon 1 of 18)
Creb3l1	NM_001005562.1	-25	-23.7	2.53	-9.08	-10.5	-1.6	Exon (NM_001005562.1/Creb3l1, exon 4 of 12)
Ino80	NM_001261404.1	-6.41	-5.25	1.88	-6.6	-7.79	2.47	Exon (NM_001261404.1/Ino80, exon 34 of 38)
Secisbp2l	NM_001168527.1	-35.4	-34	2.53	-9.19	-10.6	1.5	Exon (NM_001168527.1/Secisbp2l, exon 11 of 18)
Cops2	XM_006234901.3	-181	-179	5.06	-11.4	-13	1.08	Exon (XM_006234901.3/Cops2, exon 9 of 13)
Mkks	NM_001008353.2	-18.4	-17.1	2.5	-16	-17.9	2.51	Exon (NM_001008353.2/Mkks, exon 4 of 6)
Rrbp1	XM_230637.9	-373	#NAME?	2.89	-23.5	-25.7	0.624	Exon (XM_230637.9/Rrbp1, exon 1 of 24)
Dpm1	NM_001106544.1	-13	-11.7	2.35	-7.14	-8.38	-2.19	Exon (NM_001106544.1/Dpm1, exon 2 of 9)
Ncoa2	XM_006237744.3	-14.1	-12.8	2.55	-6.08	-7.21	1.91	Exon (XM_006237744.3/Ncoa2, exon 11 of 23)
Vcpip1	NM_176857.3	-32.5	-31	3.15	-8.89	-10.3	1.53	Exon (NM_176857.3/Vcpip1, exon 1 of 3)
Zcchc7	NM_001106658.2	-112	-110	3.54	-13.3	-15.1	1.27	Exon (NM_001106658.2/Zcchc7, exon 9 of 10)
Col15a1	NM_001100535.1	-18.3	-17	2.64	-19.2	-21.2	3.52	Exon (NM_001100535.1/Col15a1, exon 27 of 40)
Slc44a1	XM_008763716.2	-30	-28.6	3.05	-16	-17.8	2.3	3' UTR
Rgs3	XM_017593598.1	-85.8	-84.1	4.82	-5.6	-6.68	1.11	5' UTR
Rgs3	XM_017593600.1	-43.5	-42	5.86	-8.83	-10.2	1.49	5' UTR
Lrrc19	XM_006238402.3	-110	-108	4.66	-36.8	-39.3	1.71	Exon (XM_017593367.1/Ift74, exon 4 of 20)
Ifnlr1	NM_001191868.1	-53.2	-51.7	9.14	-6.48	-7.67	1.92	3' UTR
Sulf1	XM_017593137.1	-142	-140	5.33	-9.16	-10.6	1.59	Exon (XM_017593137.1/Sulf1, exon 1 of 20)
Bag1	NM_001106647.3	-98.9	-97.2	2.17	-24.2	-26.3	1.13	Exon (NM_001106647.3/Bag1, exon 1 of 7)
Mysm1	XM_006238409.3	-30.4	-29	1.94	-14.4	-16.2	1.39	Exon (XM_006238409.3/Mysm1, exon 9 of 20)
Macf1	NM_001135758.2	-137	-136	3.16	-9.86	-11.3	0.72	Exon (NM_001135758.2/Macf1, exon 55 of 98)
Cdca8	XM_008764064.1	-43.4	-41.9	6.08	-7.05	-8.28	2.42	Exon (XM_008764064.1/Cdca8, exon 4 of 11)
Phactr4	XM_017593929.1	-12.3	-11	3.33	-3.68	-4.51	1.52	Exon (XM_017593929.1/Phactr4, exon 10 of 16)
Rcan3	XM_006239218.3	-76.4	-74.8	11	-4.59	-5.55	1.56	Exon (XM_006239218.3/Rcan3, exon 1 of 5)
Pnrc2	NM_001103360.1	-1660	#NAME?	6.48	-20.7	-22.8	0.601	5' UTR
C1qb	NM_019262.1	-94	-92.3	2.27	-14.9	-16.8	2.15	Exon (NM_019262.1/C1qb, exon 1 of 3)
Szrd1	NM_001114599.2	-243	-241	12	-5.94	-7.06	-0.757	Exon (NM_001114599.2/Szrd1, exon 2 of 4)
LOC500584	XM_008764312.2	-11.1	-9.9	2.71	-14.8	-16.6	3.26	Exon (XM_008764312.2/LOC500584, exon 1 of 8)
Tardbp	XR_354412.3	-26	-24.6	5.08	-5.42	-6.48	2.46	Exon (XR_354411.3/Tardbp, exon 2 of 7)
Pqbp1	XM_006256707.2	-464	#NAME?	7.69	-15.6	-17.4	-0.802	Exon (XM_006256707.2/Pqbp1, exon 5 of 7)
Ogt	XM_006257057.3	-61.8	-60.2	4.08	-8.02	-9.34	1.11	3' UTR
Ddx3x	XM_006256653.3	-275	-273	3.38	-16.9	-18.8	0.9	Exon (XM_006256653.3/Ddx3x, exon 1 of 17)
Gripap1	NM_053807.1	-29	-27.6	2.39	-10.2	-11.7	1.56	Exon (NM_053807.1/Gripap1, exon 5 of 26)
Hpcal1	XM_017594327.1	-51.8	-50.3	3.01	-14.3	-16	1.78	3' UTR
Kidins220	XM_006239925.3	-29.7	-28.3	1.86	-7.77	-9.08	-1.19	Exon (XM_006239925.3/Kidins220, exon 11 of 32)
Arhgap5	XM_017594084.1	-184	-182	5.98	-13.8	-15.5	0.863	Exon (XM_017594084.1/Arhgap5, exon 2 of 7)
Hectd1	XM_006240086.2	-52.6	-51.1	1.88	-5.71	-6.8	0.686	Exon (XM_006240086.2/Hectd1, exon 31 of 43)
Trip11	XM_006240469.3	-35.5	-34	2.59	-10.3	-11.9	1.6	Exon (XM_006240469.3/Trip11, exon 5 of 21)
Brf1	XM_017594111.1	-74.2	-72.5	4.27	-4.64	-5.6	1.3	Exon (XM_017594111.1/Brf1, exon 4 of 15)
Cep83	XM_008765317.2	-192	-190	5.75	-8.51	-9.88	0.773	Exon (XM_008765317.2/Cep83, exon 2 of 16)
Cep290	NM_001135755.1	-19.1	-17.8	3.06	-6.96	-8.18	2.18	Exon (NM_001135755.1/Cep290, exon 41 of 54)
Rassf9	NM_022959.2	-171	-169	7.53	-29.3	-31.6	1.35	3' UTR
Myc	NM_012603.2	-27.3	-25.8	7.18	-10.3	-11.8	1.78	3' UTR
Ep300	XM_017595367.1	-136	-134	9.02	-7	-8.22	1.29	5' UTR
Syn3	NM_017109.1	-121	-120	2.22	-7.76	-9.06	-0.668	Exon (XM_006241162.3/Timp3, exon 1 of 5)
Trps1	XM_017594748.1	-57.4	-55.8	3.01	-5.56	-6.63	1.04	3' UTR
Ext1	NM_001130540.1	-516	#NAME?	10.8	-9.89	-11.4	1.17	Exon (NM_001130540.1/Ext1, exon 1 of 11)
Plec	NM_001164308.1	-144	-142	2	-13	-14.7	0.711	Exon (NM_001164308.1/Plec, exon 1 of 32)
Plec	NM_001164308.1	-163	-161	2.31	-7.96	-9.28	0.587	Exon (NM_001164308.1/Plec, exon 16 of 32)
Myh9	NM_001305877.1	-86.7	-85.1	6.56	-15.8	-17.7	2.56	Exon (NM_001305877.1/Myh9, exon 11 of 41)
Arpp19	NM_031660.1	-480	#NAME?	3.73	-28	-30.3	-0.94	Exon (XM_006243410.3/Arpp19, exon 1 of 4)
Slc9a9	NM_001271438.1	-53.1	-51.6	12.6	-5.3	-6.35	2.17	3' UTR
Peak1	XM_006243116.3	-27.7	-26.3	2.24	-8.39	-9.75	1.87	Exon (XM_006243116.3/Peak1, exon 1 of 8)
Peak1	XM_006243116.3	-50.3	-48.8	4.04	-6.64	-7.84	1.43	Exon (XM_006243116.3/Peak1, exon 4 of 8)
Loxl1	NM_001012125.1	-281	-279	2.51	-30.8	-33.2	0.752	Exon (NM_001012125.1/Loxl1, exon 7 of 7)
Rab8b	NM_153317.1	-29	-27.6	3.28	-6.42	-7.6	1.09	Exon (NM_153317.1/Rab8b, exon 2 of 8)
Tln2	XM_008766403.2	-148	-146	4.58	-9.32	-10.8	0.977	Exon (XM_008766403.2/Tln2, exon 52 of 57)
Hmgn3	NM_001007020.2	-18	-16.7	2.09	-4.07	-4.96	0.897	Exon (NM_001007020.2/Hmgn3, exon 1 of 5)
LOC108351774	XR_001839519.1	-52.9	-51.3	4.37	-5.88	-6.98	-1.57	3' UTR
Dag1	NM_053697.1	-166	-164	4.92	-10.1	-11.6	0.846	Exon (NM_053697.1/Dag1, exon 1 of 2)
Rbms3	XM_017596207.1	-201	-199	6	-19.6	-21.7	1.52	Exon (XM_017596207.1/Rbms3, exon 1 of 15)
Safb2	NM_001303144.1	-256	-254	14.1	-6.49	-7.68	-0.839	Exon (NM_001303144.1/Safb2, exon 7 of 21)
Zfp318	XM_008766902.1	-122	-120	6.93	-5.12	-6.14	0.86	Exon (XM_008766902.1/Zfp318, exon 1 of 14)
Dst	XM_008766966.2	-75.7	-74	1.98	-16.4	-18.3	1.03	Exon (XM_008766965.2/Dst, exon 65 of 90)
Col5a2	NM_053488.1	-891	#NAME?	5.17	-26	-28.3	0.73	Exon (NM_053488.1/Col5a2, exon 1 of 60)
Idh1	XM_008767076.2	-143	-142	4.24	-10.7	-12.3	1.05	3' UTR
Fn1	XM_006245151.3	-492	#NAME?	2.43	-27.6	-29.9	1.32	Exon (XM_006245151.3/Fn1, exon 1 of 45)
Cul3	NM_001106923.1	-26.2	-24.8	2.16	-11.9	-13.6	1.71	Exon (NM_001106923.1/Cul3, exon 12 of 15)
Per2	XM_006245476.3	-18.6	-17.2	3.69	-4.84	-5.83	2.29	Exon (XM_006245476.3/Per2, exon 1 of 23)
Kdr	NM_013062.1	-13.6	-12.3	2.57	-5.29	-6.33	2.94	Exon (NM_013062.1/Kdr, exon 11 of 30)
Rn28s	NR_046246.1	-5230	#NAME?	2.12	-434	-434	-0.839	Exon (NR_046239.1/Rn45s, exon 1 of 2)
Commd1	NM_001115022.1	-175	-173	6.42	-6.4	-7.57	0.68	3' UTR
LOC679894	XM_008770063.2	-30.1	-28.7	4.1	-5	-6.01	2.28	Exon (XM_008770063.2/LOC679894, exon 6 of 7)
LOC679894	XM_008770063.2	-33.3	-31.8	3.29	-14.9	-16.7	3.09	Exon (XM_008770063.2/LOC679894, exon 6 of 7)
LOC679894	XM_008770063.2	-22.3	-20.9	3.84	-11	-12.5	3.5	Exon (XM_008770063.2/LOC679894, exon 6 of 7)
LOC679894	XM_017599423.1	-60.4	-58.8	3.42	-10.5	-12	1.97	3' UTR
Ugp2	XM_006251538.1	-30.4	-29	2.54	-4.51	-5.46	-1.19	Exon (XM_006251538.1/Ugp2, exon 9 of 10)
Zbed6	XM_008769514.2	-93.6	-91.9	4.29	-14.2	-16	1.64	Exon (XM_008769514.2/Zbed6, exon 1 of 2)
Camsap2	NM_001134503.1	-297	-295	10.9	-9.15	-10.6	-0.79	Exon (NM_001134503.1/Camsap2, exon 7 of 18)
Prrc2c	NR_111961.1	-43.2	-41.7	2.67	-7.74	-9.04	-1.23	Exon (NR_111961.1/Prrc2c, exon 14 of 35)
Cadm3	XM_006250323.3	-125	-123	6.6	-10.6	-12.2	-0.825	Exon (XM_006250323.3/Cadm3, exon 1 of 10)
Cenpf	NM_001100827.1	-8.09	-6.91	3.05	-4.47	-5.41	5.06	Exon (NM_001100827.1/Cenpf, exon 6 of 21)
Sertad4	NM_001108351.1	-30.3	-28.8	2.73	-12	-13.6	1.6	Exon (NM_001108351.1/Sertad4, exon 1 of 9)
Aff4	XM_006246263.3	-48.4	-46.9	3.02	-14.1	-15.9	1.9	3' UTR
Cntrob	XM_008767825.2	-17.7	-16.4	3.1	-11	-12.6	2.99	3' UTR
Sdf2	NM_001105803.2	-87.2	-85.5	5.04	-8.79	-10.2	1.37	3' UTR
Nf1	NM_012609.1	-9.66	-8.44	1.97	-6.24	-7.39	2.04	3' UTR
Slfn2	NM_001107031.1	-58.8	-57.2	4.29	-10.6	-12.2	1.85	Exon (NM_001107031.1/Slfn2, exon 2 of 2)
Spag9	XM_006247143.3	-50.8	-49.3	2.14	-15.1	-17	1.29	Exon (XM_006247143.3/Spag9, exon 18 of 31)
Mlx	XM_017597398.1	-23.9	-22.5	2.07	-6.5	-7.69	1.32	Exon (XM_017597398.1/Mlx, exon 4 of 8)
Nbr1	XM_006247324.3	-39.6	-38.1	1.99	-3.76	-4.6	0.679	Exon (XM_006247324.3/Nbr1, exon 19 of 23)
Qrich2	XM_006247833.3	-67.2	-65.6	4.99	-7.53	-8.81	1.74	3' UTR
Ndel1	XM_017596976.1	-296	-293	3.51	-12.4	-14.1	0.629	Exon (XM_017596976.1/Ndel1, exon 6 of 8)
Armc7	NM_001127522.1	-45.9	-44.4	6.94	-6.38	-7.55	3.18	Exon (NM_001271189.1/Nt5c, exon 1 of 14)
Fbf1	XM_008768421.1	-59.6	-58	5.49	-13	-14.6	1.29	Exon (XM_008768421.1/Fbf1, exon 3 of 21)
Nynrin	XM_008770716.2	-6.91	-5.75	2.49	-3.63	-4.44	2.02	Exon (XM_008770716.2/Nynrin, exon 3 of 9)
LOC102549097	XR_596175.2	-144	-142	6.02	-8.34	-9.7	-1.26	Exon (NM_001083337.1/Pinx1, exon 7 of 7)
Zc3h13	XM_017599689.1	-130	-129	4.48	-9.15	-10.6	0.715	5' UTR
Epsti1	NM_001044257.1	-6	-4.86	2.1	-3.66	-4.48	3.07	Exon (NM_001044257.1/Epsti1, exon 1 of 12)
Lats2	NM_001107267.1	-249	-247	8.93	-15.8	-17.7	1.05	Exon (NM_001107267.1/Lats2, exon 1 of 7)
Extl3	XM_006252206.3	-85.9	-84.2	6.23	-13	-14.7	2.27	Exon (XM_006252206.3/Extl3, exon 5 of 8)
Dzip1	XM_008770948.1	-41.1	-39.7	4.43	-9.46	-10.9	-2.09	Exon (XM_008770948.1/Dzip1, exon 7 of 19)
Ssr1	XM_006253835.2	-211	-209	2.58	-10.7	-12.2	-0.73	Exon (XM_006253835.2/Ssr1, exon 3 of 9)
Tubb2a	NM_001109119.1	-48.2	-46.6	9.43	-5.55	-6.62	1.67	Exon (NM_001109119.1/Tubb2a, exon 4 of 4)
Optn	XM_006254262.3	-69.1	-67.5	5.14	-7.55	-8.84	-1.64	3' UTR
Nsd1	XM_008771492.2	-32.1	-30.6	2.95	-11.1	-12.7	1.08	Exon (XM_008771492.2/Nsd1, exon 19 of 22)
Zeb1	NM_001308265.1	-39.6	-38.2	2.33	-6.51	-7.7	0.792	Exon (NM_001308265.1/Zeb1, exon 4 of 9)
Colgalt1	NM_001106067.2	-219	-217	6.49	-4.56	-5.51	0.942	3' UTR
Gatad2a	NM_001013881.2	-148	-146	5.29	-18.9	-20.9	1.17	Exon (NM_001013881.2/Gatad2a, exon 3 of 13)
Csgalnact1	XM_008771114.2	-88.5	-86.8	5.83	-6.31	-7.47	1.17	3' UTR
Ikbkb	NM_053355.2	-161	-159	4.18	-12.7	-14.4	1.27	Exon (NM_053355.2/Ikbkb, exon 15 of 22)
Angpt2	NM_134454.1	-96.3	-94.6	6	-5.03	-6.04	-1.18	3' UTR
Casp3	NM_012922.2	-63.9	-62.3	5.72	-11.9	-13.6	1.48	Exon (NM_012922.2/Casp3, exon 1 of 7)
Fat1	XM_017600260.1	-122	-121	3.64	-18.9	-21	1.63	Exon (XM_017600260.1/Fat1, exon 28 of 29)
Vps37a	XM_008771289.2	-16	-14.7	3.83	-4.12	-5.02	-1.81	Exon (XM_008771289.2/Vps37a, exon 2 of 11)
Gtf2e2	NM_001107318.2	-26.9	-25.5	3.7	-13.1	-14.7	2.05	Exon (NM_001107318.2/Gtf2e2, exon 1 of 8)
Tm2d2	NM_001017444.1	-109	-107	5.97	-7.79	-9.1	0.931	Exon (NM_001017444.1/Tm2d2, exon 1 of 4)
Usp16	XR_001840414.1	-374	#NAME?	7.5	-14.5	-16.2	0.841	Exon (XR_001840414.1/Usp16, exon 9 of 17)
Ttc3	NM_001108315.1	-16.5	-15.2	2.01	-11.7	-13.3	2.4	Exon (NM_001108315.1/Ttc3, exon 33 of 50)
Crybg3	XM_213639.9	-121	-119	8.69	-6.15	-7.28	-1.26	Exon (XM_213639.9/Crybg3, exon 4 of 22)
Pcnp	XM_006248242.2	-384	#NAME?	9.74	-8.07	-9.4	-0.744	5' UTR
Cd200	XM_017597873.1	-202	-200	2.51	-18.6	-20.6	0.823	3' UTR
Parp14	NM_001191659.1	-71.3	-69.7	4.22	-3.82	-4.67	0.956	Exon (NM_001191659.1/Parp14, exon 14 of 17)
Atg3	NM_134394.2	-346	#NAME?	3.77	-8.67	-10.1	0.595	Exon (NM_134394.2/Atg3, exon 4 of 11)
Golgb1	XM_008768702.2	-208	-207	8.41	-17.8	-19.8	0.764	Exon (XM_008768702.2/Golgb1, exon 9 of 20)
Kpna1	XM_017597922.1	-43.6	-42.1	2.43	-6.29	-7.44	1.04	Exon (XM_017597922.1/Kpna1, exon 1 of 14)
Parp9	XM_017597994.1	-19.3	-18	2.51	-7.79	-9.11	1.93	Exon (XM_017597994.1/Parp9, exon 4 of 12)
Snap29	NM_053810.3	-8.91	-7.71	2.18	-3.94	-4.81	2.21	Exon (NM_053810.3/Snap29, exon 1 of 5)
Cxxc5	XM_017600902.1	-59.4	-57.9	3.11	-13.1	-14.8	1.53	3' UTR
Csnk1g3	NM_022855.2	-95.8	-94.1	3.48	-16	-17.9	1.41	Exon (NM_022855.2/Csnk1g3, exon 9 of 16)
Tcf4	NM_053369.1	-98.2	-96.5	4.23	-4.44	-5.38	0.753	3' UTR
Rock1	NM_031098.1	-256	-254	3.96	-15.4	-17.2	0.888	Exon (XM_006254400.3/Rock1, exon 32 of 33)
Gypc	NM_001013233.1	-110	-109	14.7	-7.18	-8.42	1.19	Exon (NM_001013233.1/Gypc, exon 1 of 3)
Dnajc18	XM_006254546.3	-24.3	-22.9	2.22	-11.3	-12.9	-1.5	Exon (XM_006254546.3/Dnajc18, exon 6 of 9)
Zfp608	NM_001107378.1	-27.4	-26	3.84	-11.5	-13.1	2.46	Exon (NM_001107378.1/Zfp608, exon 7 of 11)
Smim3	NM_173126.3	-119	-117	10.1	-3.62	-4.44	-1.06	3' UTR
Zfp407	XM_017601148.1	-27	-25.6	3.12	-14.4	-16.1	2.83	Exon (XM_017601148.1/Zfp407, exon 9 of 10)
Dnase2	NM_138539.2	-56.6	-55	3.68	-16.3	-18.2	1.49	3' UTR
Zfpm1	NM_001242627.1	-42.7	-41.2	2.18	-7.08	-8.32	0.935	5' UTR
B3gnt9	XM_008772556.2	-31.7	-30.3	4.71	-9.49	-11	2.82	3' UTR
Pmfbp1	XM_008772469.2	-92.7	-91	6.58	-4.49	-5.44	1.81	Exon (XM_008772469.2/Pmfbp1, exon 8 of 20)
St3gal2	NM_031695.2	-219	-217	13.2	-10.4	-11.9	1.15	Exon (XM_006255625.3/St3gal2, exon 6 of 8)
Mphosph6	NM_001129881.2	-181	-180	5.11	-26.6	-28.8	1.23	Exon (NM_001129881.2/Mphosph6, exon 1 of 5)
Nelfe	NM_001165901.1	-322	-320	5.56	-9.97	-11.5	-0.873	Exon (NM_001165901.1/Nelfe, exon 7 of 11)
Ppp1r18	XM_017601676.1	-132	-130	7.46	-28.1	-30.4	-2.09	Exon (XM_017601676.1/Ppp1r18, exon 3 of 3)
Ddit4	NM_080906.2	-210	-208	5.84	-6.64	-7.83	0.911	Exon (NM_080906.2/Ddit4, exon 1 of 3)
Bud31	XM_008769003.1	-141	-139	3.2	-23.9	-26	1.36	Exon (XM_008769003.1/Bud31, exon 4 of 6)
Mrps17	NM_001105923.1	-15.8	-14.5	2.69	-5.18	-6.21	1.77	Exon (NM_001105923.1/Mrps17, exon 1 of 3)
Frg1l1	XM_001070964.5	-239	-237	12	-14.3	-16	-1.74	Exon (XM_001070964.5/Frg1l1, exon 1 of 1)
Ppp1cc	XM_017598259.1	-10.5	-9.23	2.11	-3.63	-4.45	-1.64	Exon (XM_017598259.1/Ppp1cc, exon 8 of 8)
Iscu	NM_001105936.1	-166	-164	3	-5.28	-6.32	0.587	Exon (NM_001105936.1/Iscu, exon 1 of 5)
Tpp2	XM_006244853.3	-5.81	-4.67	2.1	-12.9	-14.6	4.44	Exon (XM_006244853.3/Tpp2, exon 2 of 28)
Mycbp2	NM_001106055.2	-60.6	-59.1	2.94	-9.72	-11.2	1.35	Exon (NM_001106055.2/Mycbp2, exon 28 of 91)
