# Supplementary material for: Transcriptome-Wide N6-Methyladenosine Alternations in Pulmonary Arteries of Monocrotaline-Induced Pulmonary Arterial Hypertension in Rats and Novel Therapeutic Targets
Source: Biomedicines. 2024 Feb 4;12(2):364. doi: 10.3390/biomedicines12020364 (PMC10886831; doi:10.3390/biomedicines12020364)
Supplement: Supplementary file 1 [file biomedicines-12-00364-s001.zip › Supplement Table S2.xlsx]

## Sheet: Supplement Table S2
GeneID	MCT	Control	baseMean	log2FoldChange	lfcSE	stat	pvalue	padj
Aaed1	2289.29	1351.48	1820.38	0.760416	0.175102	4.34269	1.40746e-05	0.000217112
Aamdc	130.52	214.37	172.447	-0.715347	0.356193	-2.00831	0.0446103	0.162422
Aard	66.77	8.31	37.5396	3.00472	1.24437	2.41466	0.01575	0.0751194
Aass	128.25	463.23	295.741	-1.85219	0.403044	-4.59551	4.31692e-06	7.72318e-05
Abca1	3698.68	1610.76	2654.72	1.19951	0.22919	5.23372	1.66129e-07	4.03039e-06
Abca17	30.65	1.89	16.2666	4.02457	1.50511	2.67394	0.0074966	0.0426111
Abca7	592.36	302.02	447.19	0.969914	0.285309	3.39953	0.00067503	0.00608591
Abca8	136.72	411.44	274.078	-1.58748	0.38518	-4.12139	3.76595e-05	0.0005063
Abca8a	2491.31	5209.44	3850.37	-1.06398	0.216093	-4.92373	8.49095e-07	1.76568e-05
Abca9	808.33	1296.69	1052.51	-0.681576	0.202552	-3.36495	0.000765576	0.00675767
Abcb1a	10.75	60.66	35.7064	-2.49479	1.23078	-2.027	0.0426623	0.157507
Abcc9	5800.15	9235.73	7517.94	-0.671049	0.259335	-2.58758	0.0096654	0.051986
Abcd2	165.45	273.58	219.515	-0.724117	0.310656	-2.33093	0.0197571	0.0895164
Abcd3	1027.65	1703.34	1365.49	-0.728933	0.153425	-4.75108	2.02337e-06	3.88934e-05
Abcg1	710.29	329.92	520.107	1.10643	0.222523	4.9722	6.61989e-07	1.42119e-05
Abcg3l1	189.44	112.18	150.809	0.75512	0.324506	2.32698	0.0199663	0.0900311
Abcg4	669.69	1426.15	1047.92	-1.09009	0.325034	-3.35379	0.000797129	0.00698994
Abhd14b	456.49	856.8	656.645	-0.907879	0.200739	-4.52269	6.10587e-06	0.000104341
Abhd2	912.44	412.3	662.368	1.14495	0.22889	5.00218	5.66857e-07	1.23996e-05
Abi3bp	3025.94	4629.4	3827.67	-0.6133	0.243232	-2.52146	0.0116868	0.0601894
Abl2	1469.34	687.51	1078.42	1.09441	0.202111	5.41491	6.132e-08	1.59651e-06
Ablim1	1842.69	2904.01	2373.35	-0.656405	0.236571	-2.77467	0.00552576	0.0334892
Ablim3	920.66	1425	1172.83	-0.630158	0.148757	-4.23615	2.27382e-05	0.000324785
Abtb2	547.29	347.42	447.353	0.653768	0.327033	1.99909	0.0455987	0.165224
Acaa2	1001.15	1737.61	1369.38	-0.795608	0.403855	-1.97003	0.0488347	0.173543
Acaca	1348.52	2389.18	1868.85	-0.825284	0.240789	-3.42742	0.000609344	0.0055817
Acacb	1736.47	3240.59	2488.53	-0.900136	0.338899	-2.65606	0.00790602	0.0443246
Acad8	103.01	220.98	161.993	-1.10306	0.447398	-2.46549	0.0136825	0.0675143
Acadl	2910.02	6865.9	4887.96	-1.23845	0.314778	-3.93434	8.34239e-05	0.0010158
Acadm	2267.22	4297.49	3282.36	-0.922603	0.294062	-3.13744	0.0017043	0.0130135
Acadsb	518.71	1361.77	940.245	-1.39235	0.204497	-6.80865	9.85209e-12	5.3657e-10
Acadvl	1783.49	3078.39	2430.94	-0.787606	0.218843	-3.59895	0.000319506	0.0032115
Acan	657.22	52.72	354.971	3.64025	0.611815	5.94992	2.68278e-09	9.31814e-08
Acat1	1647.11	3487.98	2567.55	-1.08262	0.338444	-3.19882	0.00137992	0.0109921
Acbd4	377.12	681.16	529.14	-0.8516	0.250721	-3.3966	0.000682278	0.00613743
Ackr1	160.83	66.94	113.882	1.26169	0.429704	2.9362	0.00332263	0.0222323
Ackr3	1381.46	2103.61	1742.54	-0.606572	0.219924	-2.7581	0.00581388	0.0348658
Acly	2256.38	3418.11	2837.24	-0.599504	0.195211	-3.07106	0.002133	0.015636
Aco2	6796.69	16626.9	11711.8	-1.29062	0.505311	-2.55411	0.0106461	0.0560556
Acot11	196.59	374	285.294	-0.926886	0.391581	-2.36703	0.0179313	0.0833429
Acot13	199.6	782.31	490.957	-1.97086	0.4542	-4.33919	1.43007e-05	0.000220387
Acot2	156.31	331.13	243.717	-1.08467	0.357283	-3.03588	0.00239837	0.017115
Acp5	161.87	32.41	97.1375	2.32486	1.06086	2.1915	0.0284157	0.117025
Acpp	18.61	0	9.30377	6.76244	2.59243	2.60854	0.00909303	0.0495398
Acsf2	716.06	1215.5	965.78	-0.763997	0.287264	-2.65956	0.00782424	0.0440048
Acsl1	2144.43	4775.93	3460.18	-1.15522	0.286361	-4.03413	5.48047e-05	0.000705412
Acsl4	983.76	535.06	759.411	0.87883	0.193503	4.54168	5.58088e-06	9.66066e-05
Acsl5	1885.64	1095.53	1490.59	0.783567	0.168858	4.64039	3.47746e-06	6.32021e-05
Acsl6	3.85	96.26	50.0559	-4.67263	1.21671	-3.84037	0.00012285	0.001423
Acss2	676.95	1091.01	883.984	-0.688912	0.30309	-2.27296	0.0230285	0.0997111
Acss3	261.65	452.28	356.965	-0.789441	0.343958	-2.29516	0.0217238	0.0954029
Acta1	709.27	2121.67	1415.47	-1.58068	0.682032	-2.3176	0.0204711	0.0916021
Acta2	68705.3	128836	98770.6	-0.907034	0.289422	-3.13396	0.00172467	0.0131377
Actc1	1040.63	28037.6	14539.1	-4.75177	0.994316	-4.77894	1.76224e-06	3.43273e-05
Actn3	0	12.76	6.38137	-6.03135	2.91715	-2.06755	0.0386826	0.146809
Actn4	26445.6	16651.5	21548.5	0.667419	0.139939	4.76937	1.84802e-06	3.56513e-05
Actr2	4932.95	3274.89	4103.92	0.591018	0.122558	4.82235	1.41879e-06	2.81857e-05
Ada	385.59	160.83	273.212	1.26123	0.328885	3.83486	0.000125637	0.00145144
Adam12	1943.61	231.5	1087.56	3.0671	0.188516	16.2697	1.61923e-59	1.85194e-56
Adam15	2210.14	1330.26	1770.2	0.732688	0.13795	5.31126	1.08871e-07	2.72808e-06
Adam23	870.14	546.7	708.423	0.670207	0.259568	2.58201	0.00982281	0.0525327
Adamts10	2496.11	4056.68	3276.4	-0.700272	0.137722	-5.08468	3.68242e-07	8.37541e-06
Adamts12	3454.53	2020.65	2737.59	0.773792	0.157198	4.9224	8.54914e-07	1.77317e-05
Adamts13	174.48	51.44	112.96	1.75946	0.694822	2.53224	0.0113337	0.0588984
Adamts15	902.06	2537.41	1719.74	-1.49178	0.296014	-5.03955	4.66638e-07	1.03059e-05
Adamts16	50.1	95.76	72.9301	-0.933801	0.474417	-1.96831	0.0490319	0.173925
Adamts17	237.64	522.28	379.959	-1.13569	0.353444	-3.21321	0.00131258	0.0105791
Adamts19	51.12	202.03	126.575	-1.9818	0.879289	-2.25386	0.0242048	0.103711
Adamts4	186.53	63.48	125.007	1.55181	0.454959	3.41089	0.000647518	0.0058876
Adamts6	2465.48	958.07	1711.78	1.3644	0.15299	8.91825	4.73715e-19	6.0681e-17
Adamts7	606.07	194.21	400.141	1.63983	0.339785	4.82609	1.39241e-06	2.77996e-05
Adamtsl1	995.01	327.65	661.33	1.60088	0.486013	3.29391	0.000988038	0.0083178
Adamtsl2	339.31	1006.8	673.052	-1.56905	0.376228	-4.17048	3.03956e-05	0.000418842
Adamtsl3	1057.51	538.44	797.977	0.974642	0.245205	3.9748	7.04383e-05	0.000879764
Adamtsl4	2946.17	4843.03	3894.6	-0.716788	0.181947	-3.93954	8.16389e-05	0.000997103
Adamtsl5	592.26	349.21	470.736	0.761417	0.215758	3.52903	0.000417084	0.00403282
Adap2	315.35	107.22	211.286	1.55654	0.351948	4.42264	9.75017e-06	0.00015722
Adck3	2399.37	4292.44	3345.91	-0.839136	0.335565	-2.50066	0.0123961	0.0626983
Adck4	386.56	201.36	293.96	0.939666	0.265935	3.53344	0.000410194	0.00398546
Adcy1	48.31	166.47	107.393	-1.78494	0.840729	-2.12309	0.0337465	0.133111
Adcy2	246.87	112.82	179.846	1.13253	0.332336	3.4078	0.000654899	0.00592109
Adcy3	1200.08	686.68	943.377	0.80462	0.164753	4.8838	1.04063e-06	2.13349e-05
Adcy4	842.03	479.27	660.648	0.811526	0.225213	3.60337	0.000314121	0.00316334
Adcy5	6649.08	10870.5	8759.76	-0.709128	0.184327	-3.84712	0.000119513	0.00139174
Adcy7	3416.56	1632.2	2524.38	1.06574	0.178113	5.98348	2.18414e-09	7.77164e-08
Adcy8	16.15	0	8.077	6.55872	2.06806	3.17143	0.00151688	0.0118653
Adgb	28.11	0	14.0573	7.35632	2.38421	3.08543	0.00203261	0.0150291
Adgra1	0	20.66	10.3281	-6.72758	2.6016	-2.58594	0.00971128	0.0521452
Adgra3	498.17	748	623.086	-0.58598	0.193004	-3.0361	0.00239657	0.017115
Adgrd1	1531.24	707.63	1119.44	1.11461	0.206952	5.38583	7.21127e-08	1.8684e-06
Adgre1	781.13	200.83	490.981	1.96082	0.302889	6.47373	9.56138e-11	4.38673e-09
Adgre4	27.46	0	13.7304	7.32248	1.77036	4.13615	3.53174e-05	0.000479239
Adgrl3	191.48	112.12	151.796	0.772287	0.363311	2.12569	0.033529	0.132625
Adgrl4	753.81	303.76	528.782	1.31038	0.28179	4.6502	3.31608e-06	6.09611e-05
Adh1	364.49	2439.02	1401.75	-2.74271	0.276119	-9.93305	2.9897e-23	6.01233e-21
Adh5	446.67	697.56	572.117	-0.644068	0.255079	-2.52497	0.0115707	0.0597645
Adh7	11.25	115.58	63.4122	-3.35577	1.11631	-3.00613	0.00264594	0.0185819
Adi1	179.77	307.89	243.83	-0.775982	0.338912	-2.28963	0.0220428	0.0964868
Adipoq	1859.56	2875.3	2367.43	-0.628552	0.229887	-2.73418	0.00625367	0.0370454
Adk	366.26	661.57	513.917	-0.85322	0.214526	-3.97723	6.97225e-05	0.000872867
Adpgk	875.7	580.91	728.307	0.592063	0.184883	3.20237	0.00136301	0.0109068
Adra1a	68.74	263.98	166.361	-1.94026	0.51398	-3.77498	0.000160021	0.00179555
Adra1b	5.05	188.08	96.5608	-5.21456	1.89684	-2.74908	0.00597625	0.0356926
Adra1d	473.67	1050.08	761.875	-1.14794	0.322257	-3.56219	0.00036778	0.0036284
Adssl1	57.97	237.73	147.85	-2.0353	0.891311	-2.28349	0.0224017	0.0975777
Aebp1	24366.2	42372.6	33369.4	-0.798208	0.166249	-4.80129	1.5765e-06	3.10874e-05
Aen	373.88	217.82	295.848	0.77772	0.392186	1.98304	0.047363	0.16988
Aes	1973.83	3224.06	2598.95	-0.708188	0.221015	-3.20426	0.00135412	0.0108519
Agl	1489.42	2501.92	1995.67	-0.748534	0.283104	-2.64402	0.00819279	0.0457562
Agmat	15.52	0	7.75815	6.49886	2.71697	2.39195	0.0167589	0.0789016
Agpat3	602.48	972.63	787.55	-0.691605	0.208155	-3.32255	0.000891977	0.0076622
Ahnak2	6487.75	3465.99	4976.87	0.904356	0.20279	4.45956	8.21275e-06	0.00013557
Ahr	815.8	338.68	577.243	1.26711	0.280566	4.51628	6.2935e-06	0.000107432
Ahrr	0	22.3	11.1504	-6.83693	1.86378	-3.6683	0.000244166	0.00255029
Aida	1970.9	1216.68	1593.79	0.695889	0.154234	4.51191	6.42471e-06	0.000109322
Aif1	824.81	188.22	506.517	2.13301	0.290373	7.34574	2.04621e-13	1.41835e-11
Aif1l	152.25	410.5	281.371	-1.43165	0.418255	-3.42291	0.000619548	0.00566869
Aim1	243.78	94.82	169.298	1.36156	0.431359	3.15644	0.00159708	0.0123717
Aim2	59.13	10.09	34.6116	2.54848	0.766988	3.32272	0.000891451	0.00766179
Ak1	229.83	396.87	313.351	-0.789019	0.349898	-2.255	0.0241333	0.103515
Akap1	1088.5	2148.53	1618.51	-0.98103	0.166883	-5.87856	4.13854e-09	1.36351e-07
Akap17b	272.99	652.95	462.969	-1.25674	0.228621	-5.49706	3.86185e-08	1.03926e-06
Akap5	17.2	50.87	34.0382	-1.56604	0.737652	-2.12301	0.0337531	0.133111
Akap6	3878.06	6181.23	5029.65	-0.672734	0.261804	-2.56961	0.0101814	0.0540353
Akap7	207.69	321.54	264.613	-0.629805	0.247068	-2.54911	0.0107997	0.0566533
Akip1	401.16	206.69	303.924	0.954097	0.411413	2.31907	0.0203911	0.091355
Akna	1011.75	577.6	794.677	0.808328	0.25532	3.16594	0.00154584	0.0120331
Akr1c19	27.99	148.99	88.4901	-2.41226	1.00291	-2.40525	0.0161612	0.0767645
Akr1e2	207.84	362.61	285.223	-0.802712	0.36697	-2.18741	0.0287129	0.118006
Aktip	515.46	806.87	661.164	-0.646042	0.200451	-3.22294	0.00126882	0.0102763
Alas1	833.9	1413.76	1123.83	-0.761965	0.262546	-2.90221	0.00370537	0.0242854
Alb	82.85	228.82	155.833	-1.46546	0.744989	-1.96709	0.0491726	0.174231
Alcam	525.83	1189.75	857.79	-1.17781	0.186634	-6.31078	2.77627e-10	1.16983e-08
Aldh16a1	461.16	270.84	366.001	0.766632	0.275968	2.77797	0.00546996	0.0331887
Aldh18a1	36.96	130.5	83.7284	-1.81887	0.748366	-2.43045	0.0150801	0.0728733
Aldh1a1	60.38	359.72	210.048	-2.57417	0.581034	-4.43032	9.40942e-06	0.000152494
Aldh1a2	1426.09	368.55	897.32	1.95243	0.320073	6.09994	1.06105e-09	4.00697e-08
Aldh1a3	1780.45	614.95	1197.7	1.53474	0.298645	5.139	2.762e-07	6.43743e-06
Aldh1l1	61.62	205.26	133.437	-1.73337	0.564705	-3.06952	0.00214402	0.0156782
Aldh1l2	881.82	375.32	628.571	1.23312	0.177146	6.96102	3.37821e-12	1.95278e-10
Aldh2	3394.89	6377.1	4886	-0.909351	0.180197	-5.04644	4.50124e-07	9.99637e-06
Aldh3a1	50.93	490.87	270.903	-3.264	0.459625	-7.10144	1.23464e-12	7.6624e-11
Aldh3b1	125.17	59.33	92.2512	1.08222	0.508718	2.12736	0.0333905	0.132241
Aldh4a1	158.11	356.48	257.296	-1.1733	0.527841	-2.22282	0.026228	0.11014
Aldh5a1	141.3	360.12	250.712	-1.34853	0.42024	-3.20896	0.00133218	0.0107136
Aldh6a1	1143.34	2428.72	1786.03	-1.08677	0.253594	-4.28549	1.8234e-05	0.00027134
Aldoa	6095.49	9210.88	7653.18	-0.595665	0.231029	-2.57831	0.00992861	0.052938
Aldoc	83.82	418.95	251.389	-2.3193	0.410613	-5.64839	1.61954e-08	4.72351e-07
Alg8	119.33	47.38	83.3538	1.33212	0.477135	2.79191	0.00523978	0.0321084
Alg9	314.11	172.78	243.445	0.862802	0.350907	2.45878	0.013941	0.0685365
Alox5	369.96	174.39	272.178	1.0851	0.308623	3.51596	0.000438172	0.00421003
Alox5ap	234.21	109.45	171.834	1.0971	0.448058	2.44857	0.0143423	0.0699938
Aloxe3	0	21.17	10.5871	-6.76297	1.85244	-3.65084	0.00026138	0.00270363
Alppl2	34.38	102.95	68.6659	-1.58037	0.628948	-2.51272	0.0119804	0.0613002
Als2cr12	7.66	28.33	17.9992	-1.88575	0.930483	-2.02664	0.0426993	0.157589
Amdhd2	317.79	160.24	239.012	0.988286	0.279579	3.53491	0.000407914	0.00397295
Amigo2	238.72	486.51	362.617	-1.02632	0.477353	-2.15002	0.0315534	0.126665
Ammecr1	224.5	129.01	176.755	0.798699	0.373259	2.1398	0.0323709	0.129258
Amtn	11.74	0	5.86789	6.09552	2.92943	2.08079	0.0374533	0.143469
Amz1	317.08	149.87	233.473	1.08079	0.371836	2.90663	0.00365346	0.0239948
Angpt1	347.55	553.04	450.292	-0.669556	0.255801	-2.61749	0.00885781	0.0485225
Angpt2	633.07	1808.84	1220.96	-1.51401	0.200548	-7.54939	4.3731e-14	3.30293e-12
Angpt4	536.46	220.44	378.449	1.28349	0.246553	5.20573	1.93237e-07	4.61808e-06
Angptl1	156.82	518.34	337.578	-1.72292	0.310932	-5.54116	3.00482e-08	8.2527e-07
Angptl4	503.63	883.96	693.795	-0.811597	0.370509	-2.19049	0.0284885	0.117264
Ank2	2179.46	3414.96	2797.21	-0.647736	0.192697	-3.36142	0.000775421	0.00683287
Ank3	311.62	684.39	498.004	-1.13539	0.526571	-2.15619	0.0310686	0.12515
Ankdd1b	0	11.31	5.65599	-5.86095	2.94525	-1.98996	0.0465951	0.168036
Ankh	7603.05	1267.7	4435.38	2.58372	0.217054	11.9036	1.13331e-32	4.65297e-30
Ankle1	106.46	22.8	64.6325	2.22896	1.12309	1.98467	0.0471811	0.169501
Ankmy2	888.47	1388.23	1138.35	-0.64393	0.158711	-4.05724	4.96565e-05	0.000643806
Ankrd29	77.34	247.31	162.326	-1.67783	0.406162	-4.13094	3.61287e-05	0.000488591
Ankrd33b	61.11	180.15	120.629	-1.55768	0.504736	-3.08613	0.00202777	0.0150109
Ankrd34a	52.14	98.98	75.5622	-0.92688	0.439986	-2.10661	0.0351512	0.13702
Ankrd35	7.62	69.32	38.4706	-3.17597	0.755635	-4.20305	2.63347e-05	0.000370212
Ankrd63	280.6	103.73	192.167	1.43776	0.294949	4.87459	1.09035e-06	2.22121e-05
Ankrd9	97.84	164.08	130.959	-0.746551	0.352648	-2.11698	0.0342612	0.134393
Anks1b	23.7	0	11.8501	7.10969	1.83469	3.87514	0.000106564	0.00126674
Anln	814.82	252.62	533.72	1.69	0.276549	6.11105	9.89798e-10	3.7556e-08
Anlnl1	176.96	44.52	110.741	1.9939	0.511613	3.89727	9.72823e-05	0.00116593
Ano1	5681.83	1851.13	3766.48	1.61819	0.253331	6.38764	1.68464e-10	7.47213e-09
Ano10	775.77	1178.48	977.123	-0.602487	0.257456	-2.34015	0.0192758	0.0879718
Ano2	27.4	88.55	57.9752	-1.69566	0.648915	-2.61307	0.00897319	0.0490204
Ano5	0	231.69	115.847	-10.2157	3.90712	-2.61463	0.00893254	0.0488316
Anp32e	1481.58	2465.88	1973.73	-0.735295	0.125831	-5.84353	5.11056e-09	1.64318e-07
Anxa2	8610.89	5594.16	7102.52	0.622358	0.161726	3.84822	0.00011898	0.00138755
Anxa3	494.01	1185.82	839.91	-1.26353	0.337687	-3.74174	0.000182752	0.0020153
Anxa6	5353.34	8448.28	6900.81	-0.658072	0.133459	-4.93088	8.18589e-07	1.71113e-05
Anxa8	1061.14	15.49	538.317	6.0881	1.03259	5.89596	3.7252e-09	1.23751e-07
Aoah	84.39	2.52	43.4526	5.07208	1.17697	4.30945	1.63661e-05	0.000247454
Aoc3	10346.2	18166.2	14256.2	-0.812079	0.173272	-4.68672	2.77613e-06	5.19292e-05
Aox1	1573.27	2474.22	2023.75	-0.652989	0.223173	-2.92594	0.00343417	0.0228735
Aox3	1054.48	2634.21	1844.34	-1.32039	0.201854	-6.5413	6.09853e-11	2.93242e-09
Ap1g2	192.1	111.6	151.851	0.781815	0.352	2.22107	0.0263463	0.110521
Ap1s2	672.59	370.58	521.588	0.861372	0.217944	3.95225	7.74192e-05	0.00095137
Ap3s1	510.83	309.46	410.142	0.722435	0.233852	3.08929	0.00200639	0.0148871
Apaf1	878.25	570.95	724.6	0.622122	0.232602	2.67462	0.00748133	0.0425394
Apbb1ip	687.26	338.07	512.665	1.02329	0.218215	4.68934	2.74087e-06	5.13296e-05
Apcdd1	391.63	1027.39	709.509	-1.39028	0.290762	-4.78151	1.73987e-06	3.40156e-05
Aph1a	561.74	369.33	465.536	0.60401	0.207547	2.91023	0.00361161	0.0238274
Aplnr	800.04	228.74	514.39	1.80522	0.338889	5.32688	9.99154e-08	2.5274e-06
Apobec1	378.38	126.94	252.66	1.57636	0.279367	5.64263	1.67476e-08	4.85802e-07
Apobr	254.48	101.44	177.963	1.32578	0.378132	3.50613	0.000454674	0.00435161
Apoe	19380.3	7299.07	13339.7	1.40874	0.236867	5.9474	2.72436e-09	9.38323e-08
Apol11a	121.71	356.89	239.3	-1.55461	0.375757	-4.13727	3.51462e-05	0.000477321
Apool	176.65	302.3	239.475	-0.77622	0.38552	-2.01344	0.0440686	0.161212
Aprt	1053.87	664.84	859.359	0.664709	0.198074	3.35586	0.000791174	0.00694533
Aqp1	13558.2	6067.9	9813.06	1.15979	0.197695	5.86653	4.45008e-09	1.44826e-07
Aqp11	13.08	0	6.54148	6.25322	2.84389	2.19882	0.0278904	0.115277
Aqp7	170.8	350.07	260.433	-1.03647	0.345095	-3.00344	0.00266942	0.0186802
Arap1	3777.36	2513.44	3145.4	0.587789	0.187424	3.13615	0.00171179	0.0130644
Arf3	448.8	268.98	358.889	0.740113	0.339697	2.17874	0.0293508	0.119863
Arfgef3	53.45	146.07	99.7594	-1.44856	0.702438	-2.06218	0.0391905	0.148242
Arg1	143.15	18.6	80.8759	2.95309	1.19192	2.4776	0.013227	0.065876
Arhgap10	1599.14	3373.45	2486.3	-1.07679	0.140949	-7.63956	2.17968e-14	1.72778e-12
Arhgap11a	435.82	178.2	307.007	1.28851	0.291514	4.42004	9.86808e-06	0.000158962
Arhgap15	149.03	43.31	96.1732	1.78088	0.472448	3.76948	0.00016359	0.00183303
Arhgap18	606.14	374.71	490.425	0.692381	0.308221	2.24638	0.0246795	0.105164
Arhgap20	230.01	412.19	321.104	-0.8405	0.297546	-2.82477	0.00473144	0.0295937
Arhgap22	386.21	101.17	243.687	1.937	0.344931	5.61561	1.9587e-08	5.57557e-07
Arhgap25	407.58	140.45	274.017	1.53466	0.292112	5.25367	1.491e-07	3.64486e-06
Arhgap26	804.15	529.3	666.726	0.602357	0.277119	2.17364	0.0297321	0.120984
Arhgap27	624.53	199.32	411.921	1.64475	0.267708	6.14382	8.05585e-10	3.1538e-08
Arhgap30	705.92	191.03	448.477	1.88571	0.304845	6.1858	6.1789e-10	2.46725e-08
Arhgap4	341.12	124.71	232.916	1.45435	0.337107	4.31422	1.60167e-05	0.000243028
Arhgap44	235.24	423.31	329.277	-0.846823	0.310048	-2.73126	0.00630924	0.0372781
Arhgap45	1173.09	301.65	737.37	1.95908	0.286865	6.82929	8.53375e-12	4.69562e-10
Arhgap6	263.94	603.67	433.804	-1.19226	0.267098	-4.46376	8.05346e-06	0.000133215
Arhgap9	308.21	78.69	193.45	1.96945	0.332278	5.92713	3.08271e-09	1.05022e-07
Arhgdia	6894.71	4567.87	5731.29	0.593967	0.135585	4.38079	1.18252e-05	0.000185815
Arhgdib	734.36	342.72	538.541	1.09791	0.245013	4.48101	7.42897e-06	0.000124038
Arhgef16	102.3	43.56	72.9313	1.23143	0.603504	2.04046	0.0413042	0.15402
Arhgef28	500.87	776.69	638.778	-0.63233	0.259501	-2.43671	0.0148215	0.071801
Arhgef37	256.32	518.93	387.623	-1.01802	0.322766	-3.15403	0.00161032	0.0124505
Arhgef4	240.99	382.19	311.591	-0.663899	0.30399	-2.18395	0.0289662	0.11876
Arid3a	347.22	187.55	267.386	0.886911	0.307995	2.87963	0.00398143	0.025838
Arid3b	111.95	238.11	175.028	-1.08672	0.405487	-2.68004	0.00736131	0.0420211
Arid5b	4413.93	2886.56	3650.24	0.612981	0.168635	3.63496	0.000278023	0.00285183
Arl11	204.72	61.23	132.975	1.74273	0.417049	4.17872	2.93157e-05	0.000406058
Arl4c	244.56	58.19	151.372	2.0696	0.357413	5.79051	7.01736e-09	2.17334e-07
Arl4d	85.79	346.42	216.106	-2.01286	0.433253	-4.64594	3.38538e-06	6.19505e-05
Armc9	613.56	384.85	499.205	0.674731	0.273277	2.46904	0.0135477	0.0670764
Armcx4	1946.44	1170.77	1558.61	0.733934	0.180376	4.06891	4.72339e-05	0.000617212
Arnt2	232.65	486.43	359.542	-1.0636	0.275509	-3.8605	0.000113155	0.00133321
Arntl	236.06	734.26	485.157	-1.63851	0.406189	-4.03387	5.48659e-05	0.000705633
Arntl2	326.35	34.31	180.327	3.24218	0.555508	5.83643	5.33304e-09	1.70444e-07
Arpc1b	9099.22	4097.68	6598.45	1.15105	0.134435	8.56213	1.10801e-17	1.28562e-15
Arpc2	5634.14	3256.38	4445.26	0.790961	0.152704	5.17971	2.22236e-07	5.22532e-06
Arpc3	1665.67	918.24	1291.96	0.859012	0.216822	3.96182	7.43795e-05	0.000921799
Arpc4	2699.55	1712.23	2205.89	0.657285	0.130173	5.04933	4.43355e-07	9.85973e-06
Arpc5	1440.54	930.91	1185.73	0.630174	0.19607	3.21403	0.00130887	0.010558
Arrb2	401.71	151.14	276.423	1.41106	0.314815	4.4822	7.38771e-06	0.000123478
Arrdc1	256.55	141.63	199.089	0.858205	0.3412	2.51525	0.0118947	0.0610051
Arsi	1590.11	533.79	1061.95	1.57561	0.328982	4.78934	1.6733e-06	3.27942e-05
Art4	64.41	19.27	41.8377	1.73787	0.716433	2.42572	0.015278	0.0735953
Arvcf	342.78	754.2	548.488	-1.13657	0.380064	-2.99047	0.00278544	0.0193243
As3mt	281.65	496.59	389.122	-0.818193	0.277688	-2.94644	0.00321453	0.0217073
Asb12	8.86	68.46	38.6602	-2.95887	1.49197	-1.98319	0.0473458	0.169863
Asb2	485.53	2679.83	1582.68	-2.46426	0.182122	-13.5308	1.02866e-41	8.23545e-39
Asf1b	58.59	0.94	29.7674	5.96796	1.27003	4.69907	2.61344e-06	4.91732e-05
Asgr2	205.88	73.17	139.527	1.49512	0.46285	3.23026	0.00123677	0.0100524
Aspm	450.27	99.76	275.012	2.17295	0.322474	6.73837	1.60177e-11	8.46453e-10
Ass1	458.3	25.2	241.745	4.18896	0.517423	8.09581	5.68835e-16	5.65725e-14
Atf2	637.4	990.36	813.881	-0.636268	0.204398	-3.11289	0.00185267	0.0139141
Atg7	503.42	335.4	419.408	0.586519	0.211005	2.77964	0.00544185	0.0330817
Atg9b	3.08	36.95	20.0182	-3.6087	1.49468	-2.41436	0.0157627	0.0751393
Atl2	696.35	1507.35	1101.85	-1.11355	0.157488	-7.07069	1.54167e-12	9.45796e-11
Atp10a	1326.06	795.87	1060.97	0.736672	0.211574	3.48186	0.000497945	0.00469005
Atp1a2	3052.78	10111.5	6582.12	-1.72777	0.330149	-5.2333	1.6651e-07	4.03067e-06
Atp1a3	25.82	1.89	13.8535	3.77678	1.58397	2.38438	0.017108	0.0801208
Atp1b2	419.76	1295.22	857.49	-1.62481	0.210671	-7.71257	1.23312e-14	1.02304e-12
Atp1b3	2167.24	1422.09	1794.66	0.608049	0.180056	3.377	0.00073281	0.00651875
Atp2a2	7015.2	29169.3	18092.3	-2.05589	0.940199	-2.18666	0.0287675	0.1182
Atp2a3	648.03	1283.75	965.891	-0.985247	0.224262	-4.39328	1.11651e-05	0.000177005
Atp2b1	3152.92	1675.26	2414.09	0.912289	0.111655	8.17061	3.06842e-16	3.16978e-14
Atp2b2	0	77.46	38.7301	-8.63638	1.61875	-5.33521	9.54346e-08	2.42941e-06
Atp2b3	0	18.11	9.0526	-6.53696	2.6452	-2.47125	0.013464	0.0668126
Atp2b4	5340.65	14961.6	10151.1	-1.48607	0.206702	-7.18946	6.50482e-13	4.18294e-11
Atp2c2	0	17.68	8.84028	-6.50415	2.00551	-3.24314	0.0011822	0.00968255
Atp4a	1.36	18.39	9.87358	-3.74113	1.71712	-2.17873	0.0293518	0.119863
Atp5a1	6799.47	15121.8	10960.7	-1.1532	0.293435	-3.92998	8.49516e-05	0.00103284
Atp5b	7618.55	17478.3	12548.5	-1.198	0.475663	-2.51858	0.0117828	0.0605477
Atp5c1	1661.92	3363.97	2512.95	-1.01764	0.309727	-3.28561	0.00101761	0.00852196
Atp5d	1247.5	2103.93	1675.72	-0.754447	0.301876	-2.4992	0.0124475	0.0628537
Atp5g3	786.35	1542.98	1164.66	-0.97298	0.370858	-2.62359	0.00870088	0.0477937
Atp5h	1966.34	3315.3	2640.82	-0.753815	0.228836	-3.29413	0.000987269	0.0083157
Atp5i	905.53	1879.09	1392.31	-1.05373	0.287529	-3.66477	0.000247562	0.00257568
Atp5j	1476.88	2283.12	1880	-0.628792	0.301621	-2.08471	0.0370955	0.142337
Atp5j2	767.61	1344.36	1055.99	-0.809131	0.279491	-2.89501	0.00379142	0.0247789
Atp5l	1646.32	2995.36	2320.84	-0.863765	0.302262	-2.85767	0.00426765	0.0272789
Atp5o	1256.81	2328.69	1792.75	-0.890012	0.314845	-2.82683	0.0047012	0.0294505
Atp5s	77.3	230.99	154.145	-1.58008	0.574019	-2.75266	0.00591141	0.0353713
ATP6	320587	574097	447342	-0.840579	0.226906	-3.70452	0.000211788	0.00227594
Atp6ap1l	0	23.64	11.8225	-6.92471	2.47746	-2.79508	0.00518862	0.0318437
Atp6v0e2	72.88	206.82	139.852	-1.50782	0.376856	-4.00104	6.30644e-05	0.000795109
Atp6v1e2	22.27	78.82	50.5486	-1.81875	0.614927	-2.95767	0.00309972	0.0210576
Atp8b1	2537.83	1057.92	1797.87	1.26257	0.139666	9.03996	1.56728e-19	2.12672e-17
Atp8b3	24.56	68.28	46.4233	-1.47013	0.718697	-2.04555	0.0408002	0.152674
Atp8b4	268.42	44.43	156.428	2.59924	0.357747	7.26559	3.71418e-13	2.48834e-11
Atrip	41.74	111.76	76.7492	-1.42049	0.451052	-3.14928	0.00163676	0.012606
Atrx	2892.94	4644.83	3768.88	-0.682729	0.144466	-4.72589	2.2911e-06	4.36728e-05
Aurka	109.72	39.75	74.732	1.45892	0.604214	2.41457	0.0157539	0.0751194
Aurkb	102.64	37.56	70.0996	1.45048	0.454672	3.19016	0.00142194	0.0112769
Avpr1a	193.12	62.53	127.825	1.62901	0.383951	4.24276	2.20786e-05	0.00031763
Axin2	294.04	464.9	379.471	-0.65982	0.263037	-2.50847	0.0121255	0.0618561
B3gat2	29.8	141.25	85.5253	-2.24581	0.750556	-2.99219	0.00276983	0.0192577
B3gnt7	139.34	40.83	90.0826	1.77533	0.416862	4.25879	2.05541e-05	0.000299193
B3gnt9	864.92	561.01	712.969	0.624594	0.244005	2.55976	0.0104744	0.0553334
B4galt6	958.45	564.64	761.548	0.762519	0.256283	2.9753	0.00292699	0.0201232
Bach1	514.26	282.78	398.524	0.86298	0.229855	3.75445	0.000173722	0.00193303
Bahcc1	1048.6	660.26	854.433	0.668219	0.224701	2.97382	0.00294117	0.0202033
Baiap2l1	88.61	273.82	181.211	-1.62674	0.4245	-3.83213	0.000127039	0.00146552
Baiap3	30.63	107.22	68.9248	-1.80484	0.594978	-3.03346	0.00241763	0.0172202
Bard1	109.14	39.29	74.2118	1.47335	0.62309	2.36458	0.0180504	0.0836778
Basp1	1616.31	371.51	993.909	2.12088	0.282554	7.5061	6.09148e-14	4.54525e-12
Batf	40.24	2.83	21.538	3.83156	1.56093	2.45467	0.0141014	0.0690285
Batf3	68.74	23.87	46.3032	1.52796	0.750179	2.0368	0.0416703	0.154988
Bax	327.63	196.73	262.183	0.737764	0.31917	2.31151	0.0208049	0.0927934
Baz1a	1317.24	648.68	982.961	1.02203	0.156365	6.53619	6.31043e-11	2.9983e-09
Bbs1	325.02	506.62	415.821	-0.640515	0.197613	-3.24126	0.00119004	0.00974176
Bcan	11.1	542.3	276.7	-5.60844	2.2074	-2.54074	0.0110617	0.0577689
Bcat1	3312.91	622.65	1967.78	2.41255	0.236726	10.1913	2.16795e-24	4.95902e-22
Bche	319.38	1069.42	694.4	-1.74334	0.32817	-5.31229	1.08254e-07	2.71687e-06
Bckdha	704.91	1248.98	976.945	-0.825585	0.208735	-3.95519	7.64735e-05	0.000942643
Bckdhb	312.01	610.8	461.406	-0.970021	0.361895	-2.6804	0.00735348	0.042006
Bcl2l12	85.01	31.77	58.3895	1.42213	0.498067	2.8553	0.00429962	0.0274723
Bcl3	254.48	107.92	181.2	1.24082	0.426931	2.90636	0.00365659	0.0240055
Bdkrb2	1019.16	626.02	822.587	0.703798	0.302043	2.33013	0.0197994	0.0896572
Bdnf	342.45	99.4	220.926	1.7808	0.669785	2.65877	0.00784263	0.0440927
Bean1	271.22	77.41	174.314	1.80852	0.364705	4.95884	7.09139e-07	1.51397e-05
Bend6	452.07	191.6	321.837	1.24087	0.391478	3.16971	0.00152593	0.0119186
Bgn	93401.8	38371	65886.4	1.28346	0.16027	8.00813	1.16462e-15	1.10999e-13
Bhlhe40	2639.15	1237.3	1938.22	1.09207	0.177951	6.13692	8.41367e-10	3.27785e-08
Bhlhe41	528.7	243.24	385.97	1.11941	0.299446	3.73829	0.000185279	0.00203616
Bicc1	6327.21	3364.01	4845.61	0.91156	0.196384	4.64173	3.45504e-06	6.29552e-05
Bid	283.22	178.66	230.936	0.664707	0.30469	2.18158	0.0291402	0.119272
Bin2	267.35	83.04	175.196	1.68611	0.394748	4.27137	1.94275e-05	0.00028565
Birc2	802.89	1205.13	1004.01	-0.58646	0.159336	-3.68066	0.000232633	0.00245707
Birc3	252.88	130.12	191.504	0.959994	0.313416	3.063	0.00219126	0.0159412
Birc5	40.24	5.91	23.0768	2.78449	1.42047	1.96025	0.0499661	0.176146
Blk	6.93	204.56	105.743	-4.89627	0.842181	-5.8138	6.10701e-09	1.92113e-07
Blnk	222.34	46.5	134.419	2.25772	0.432334	5.22216	1.76849e-07	4.25181e-06
Bmp2k	2149.74	1140.18	1644.96	0.914567	0.172598	5.29883	1.16546e-07	2.90223e-06
Bmp3	1373.5	3795.34	2584.42	-1.46621	0.249543	-5.87557	4.21382e-09	1.37697e-07
Bmp7	6.08	38	22.0415	-2.63157	1.13943	-2.30955	0.0209131	0.0930966
Bmp8b	2.12	25.72	13.9202	-3.60382	1.29246	-2.78835	0.00529774	0.032414
Bmper	370.21	104.88	237.541	1.82356	0.400814	4.54963	5.37405e-06	9.34303e-05
Bmpr1b	985.36	2371.68	1678.52	-1.26659	0.222732	-5.68659	1.29597e-08	3.8357e-07
Bmx	45.53	157.92	101.727	-1.79317	0.712484	-2.51679	0.011843	0.0608177
Bnc2	793.42	324.71	559.065	1.28879	0.317064	4.06475	4.80834e-05	0.000626963
Bnip3	995.56	1537.14	1266.35	-0.627135	0.27014	-2.32152	0.0202588	0.0909655
Bola1	141.79	271.87	206.829	-0.93983	0.27775	-3.38373	0.000715081	0.00638232
Bphl	141.11	259.91	200.511	-0.879884	0.334973	-2.62673	0.0086209	0.0475173
Bpifa1	60.22	221.84	141.03	-1.88064	0.947028	-1.98583	0.0470517	0.169263
Brca1	283.36	90.54	186.949	1.64244	0.448646	3.66088	0.000251354	0.00260835
Brca2	285.87	135.63	210.746	1.07616	0.293147	3.67105	0.000241557	0.00252798
Brd2	104.81	358.3	231.553	-1.77286	0.835165	-2.12276	0.0337737	0.133111
Bri3	398.21	628.44	513.328	-0.658049	0.209662	-3.13862	0.00169745	0.0129878
Brip1	289.75	99.29	194.52	1.54547	0.394584	3.91671	8.97657e-05	0.00108478
Bst1	125.67	39.79	82.7316	1.65171	0.579631	2.84959	0.00437759	0.027804
Btbd11	86.09	467.69	276.893	-2.4382	0.40988	-5.94856	2.70511e-09	9.37539e-08
Btg2	1268.48	2343.07	1805.77	-0.884865	0.31286	-2.82831	0.00467948	0.0293835
Btg3	581.17	260.93	421.049	1.15523	0.292455	3.95011	7.81145e-05	0.000959179
Btnl9	304.23	172.84	238.533	0.815708	0.336548	2.42375	0.0153613	0.0738411
Bub1	270.86	154.46	212.656	0.811643	0.340943	2.38059	0.0172851	0.0808273
Bub1b	252.67	14.83	133.752	4.0813	0.855195	4.77236	1.82076e-06	3.52528e-05
Bves	160.97	271.07	216.024	-0.751304	0.294728	-2.54915	0.0107987	0.0566533
C1qa	2268.01	478.53	1373.27	2.24461	0.252678	8.88329	6.49094e-19	8.24865e-17
C1qb	2485.45	607.03	1546.24	2.03382	0.204466	9.94699	2.59922e-23	5.33573e-21
C1qc	4485.63	1113.23	2799.43	2.011	0.196819	10.2175	1.65555e-24	3.84184e-22
C1qtnf1	1439.18	2252.18	1845.68	-0.64598	0.154057	-4.19311	2.75153e-05	0.000384231
C1qtnf3	308.91	24.91	166.91	3.63355	1.75375	2.07187	0.0382773	0.145546
C1qtnf5	1311.81	578.84	945.324	1.18127	0.256561	4.60426	4.13937e-06	7.43879e-05
C1qtnf9	176.24	529.89	353.062	-1.58848	0.521819	-3.04413	0.00233358	0.0167835
C1r	19759.4	10504.1	15131.7	0.911612	0.147915	6.16308	7.13434e-10	2.81367e-08
C1s	13010.5	5080.04	9045.27	1.35665	0.207219	6.54694	5.87275e-11	2.84092e-09
C2	2072.31	511.77	1292.04	2.0174	0.216514	9.31763	1.18967e-20	1.71613e-18
C2cd4a	106.36	41.44	73.899	1.35551	0.462936	2.92807	0.00341072	0.0227457
C2cd5	486.14	312.92	399.527	0.635934	0.288995	2.2005	0.0277713	0.114998
C3	527.85	96.67	312.263	2.44587	0.408115	5.99309	2.0589e-09	7.39174e-08
C3ar1	321.39	73.73	197.559	2.12142	0.505611	4.19575	2.71975e-05	0.000380669
C4a	1017.2	293.2	655.2	1.796	0.537554	3.34105	0.000834612	0.00726689
C4b	16626.2	4807.55	10716.9	1.79028	0.238763	7.49815	6.47252e-14	4.79805e-12
C5ar1	241.5	58.3	149.903	2.05649	0.423813	4.85235	1.22008e-06	2.46354e-05
C5ar2	772.66	162.97	467.816	2.2429	0.385894	5.81222	6.16488e-09	1.93553e-07
C6	1188.85	467.18	828.015	1.34669	0.399312	3.37254	0.000744795	0.00661068
Cacna1c	3541.45	5501.66	4521.55	-0.63543	0.129288	-4.91483	8.88589e-07	1.83825e-05
Cacna1g	457.49	1685.93	1071.71	-1.8821	0.293246	-6.41815	1.37937e-10	6.20408e-09
Cacna1h	222.76	342.66	282.711	-0.621433	0.254813	-2.43878	0.014737	0.0715275
Cacna1i	57.39	0	28.6925	8.38553	1.48582	5.64371	1.66423e-08	4.83623e-07
Cacnb1	150.21	67.4	108.805	1.16067	0.472223	2.45788	0.0139759	0.0686236
Cacnb2	335.93	705.27	520.597	-1.07147	0.294449	-3.63888	0.000273829	0.00281602
Cacnb3	556.34	197.24	376.791	1.49745	0.402389	3.7214	0.000198121	0.00215218
Cacnb4	93.31	211.4	152.355	-1.17745	0.476664	-2.47018	0.0135043	0.066924
Cadps2	390.22	164.73	277.476	1.24241	0.317316	3.91538	9.0261e-05	0.00108994
Calhm2	755.76	476.67	616.217	0.663805	0.195305	3.39882	0.000676783	0.00609828
Calml3	257.95	520.87	389.41	-1.01207	0.264538	-3.82582	0.00013034	0.00149713
Camk2a	0	36.07	18.0348	-7.53236	1.65	-4.56506	4.99357e-06	8.75762e-05
Camk2n1	288.94	646.38	467.657	-1.16023	0.255156	-4.54713	5.43823e-06	9.43412e-05
Camsap3	98.08	256.49	177.284	-1.38689	0.538252	-2.57665	0.00997618	0.0531576
Cand2	690.87	1527.42	1109.14	-1.14518	0.25491	-4.49249	7.03937e-06	0.000118149
Cap2	174.23	1120.95	647.59	-2.68492	0.467571	-5.74227	9.34167e-09	2.83293e-07
Capg	1285.12	374.8	829.959	1.77818	0.20939	8.49219	2.02783e-17	2.25484e-15
Capn5	960.25	1610.52	1285.39	-0.745474	0.214135	-3.48132	0.000498945	0.00469671
Car2	50.06	149	99.5277	-1.5732	0.493596	-3.18723	0.00143643	0.0113693
Car9	32.22	117.97	75.0957	-1.86891	0.727834	-2.56777	0.0102356	0.054269
Card11	262.92	63.35	163.136	2.04901	0.675785	3.03205	0.002429	0.0172816
Card14	465.49	300.52	383.007	0.63168	0.302071	2.09116	0.0365134	0.140914
Carhsp1	1509.12	664.73	1086.92	1.18341	0.191784	6.17051	6.80691e-10	2.69117e-08
Carns1	205.79	450.06	327.925	-1.1303	0.285429	-3.95999	7.49514e-05	0.000927451
Cars	1065.03	687.84	876.437	0.630898	0.184786	3.41421	0.000639662	0.00582941
Casc1	111.21	215.18	163.196	-0.950536	0.453244	-2.09719	0.0359771	0.139281
Casp1	162.6	84.73	123.666	0.94282	0.472509	1.99535	0.0460049	0.166253
Casp3	988.66	446.33	717.495	1.14801	0.207052	5.54454	2.94726e-08	8.1085e-07
Casp8	304.29	187.52	245.906	0.700906	0.304801	2.29956	0.0214734	0.0946614
Casz1	321.61	974.3	647.953	-1.59877	0.372725	-4.2894	1.79156e-05	0.000267099
Cat	1966.84	4015.49	2991.17	-1.02957	0.222808	-4.62088	3.82113e-06	6.91345e-05
Cav1	5754.65	14504.5	10129.6	-1.33363	0.195802	-6.81111	9.68502e-12	5.29271e-10
Cav2	1545.57	3130.07	2337.82	-1.0177	0.24307	-4.18687	2.82832e-05	0.000393801
Cav3	151.21	270.84	211.026	-0.842733	0.417879	-2.01669	0.0437275	0.160294
Cbarp	151.11	69.5	110.302	1.11959	0.480637	2.32939	0.0198382	0.0897246
Cbfa2t3	795.94	1211.4	1003.67	-0.606648	0.217768	-2.78576	0.00534031	0.0325997
Cbs	17.19	0	8.59709	6.64605	2.11753	3.13858	0.00169769	0.0129878
Cbx5	976.76	1806.45	1391.6	-0.886857	0.142798	-6.21056	5.27976e-10	2.13483e-08
Cbx7	350.86	1012.78	681.821	-1.52823	0.303353	-5.0378	4.70918e-07	1.03861e-05
Cc2d2a	750	1126.78	938.389	-0.586463	0.18995	-3.08746	0.00201872	0.0149509
Ccdc106	77.65	148.29	112.968	-0.936257	0.46309	-2.02176	0.0432013	0.158875
Ccdc114	0	18.75	9.37722	-6.58912	1.92533	-3.42233	0.000620868	0.00567752
Ccdc158	44.63	123.03	83.8267	-1.46454	0.587788	-2.49161	0.0127166	0.06377
Ccdc160	3.03	40.89	21.958	-3.74039	1.47933	-2.52844	0.011457	0.0592999
Ccdc170	29.72	92.08	60.9043	-1.63257	0.554254	-2.94553	0.00322403	0.0217418
Ccdc171	142.6	295.44	219.02	-1.05018	0.349283	-3.00666	0.00264136	0.0185579
Ccdc181	101.03	230.99	166.008	-1.19267	0.373944	-3.18943	0.00142555	0.0113
Ccdc51	97.63	212.02	154.825	-1.12069	0.32788	-3.41799	0.000630853	0.00575568
Ccdc57	1022.18	612.47	817.324	0.738651	0.194913	3.78965	0.000150859	0.00170229
Ccdc65	246.84	620.47	433.659	-1.32898	0.358515	-3.70691	0.000209806	0.00225919
Ccdc68	0	13.23	6.61538	-6.08686	2.862	-2.12679	0.0334379	0.132363
Ccdc69	52.35	124.58	88.4642	-1.24774	0.62169	-2.00702	0.0447476	0.162841
Ccdc74a	41.8	151.15	96.4742	-1.85293	0.649894	-2.85113	0.0043564	0.0277005
Ccdc85c	189.89	407.25	298.568	-1.09977	0.346947	-3.16985	0.0015252	0.0119186
Ccdc88b	391.01	86.01	238.511	2.18179	0.366498	5.95309	2.63121e-09	9.21102e-08
Ccdc88c	915.53	450.07	682.802	1.02448	0.284531	3.6006	0.000317478	0.00319513
Ccdc96	15.59	42.12	28.8582	-1.42963	0.727023	-1.96642	0.04925	0.174422
Cchcr1	505.17	231.17	368.17	1.12687	0.221771	5.08123	3.75004e-07	8.50504e-06
Ccl2	609.77	87.46	348.613	2.80513	0.457664	6.12924	8.82993e-10	3.39867e-08
Ccl21	1519.44	339.69	929.565	2.16205	0.290781	7.43534	1.04302e-13	7.59282e-12
Ccl4	20.46	0	10.232	6.89868	1.86419	3.70063	0.000215064	0.00230495
Ccl6	648.56	287.5	468.03	1.1747	0.271509	4.32656	1.51459e-05	0.000231409
Ccl7	162.67	9.47	86.07	4.08217	0.821007	4.97215	6.62133e-07	1.42119e-05
Ccl9	12.09	0	6.04489	6.13773	2.33448	2.62917	0.00855942	0.0472435
Ccna2	257.2	55.4	156.3	2.2134	0.464908	4.76094	1.92694e-06	3.70843e-05
Ccnb1	169.75	37.15	103.45	2.185	0.500169	4.36852	1.25091e-05	0.000195601
Ccnb2	85.16	4.25	44.7075	4.34691	0.939686	4.62592	3.7294e-06	6.76275e-05
Ccnd1	1454.76	572.69	1013.72	1.34438	0.155035	8.67142	4.26748e-18	5.13766e-16
Ccne2	181.29	69.19	125.238	1.38449	0.485508	2.85164	0.00434947	0.0276693
Ccnf	92.07	26.47	59.2673	1.79243	0.559783	3.20201	0.0013647	0.0109095
Ccnyl1	753.82	271.02	512.422	1.47687	0.265173	5.56944	2.55554e-08	7.15371e-07
Ccr5	454.57	79.09	266.826	2.52597	0.346854	7.28253	3.27607e-13	2.20405e-11
Cd109	455.66	89.2	272.426	2.3483	0.39873	5.88944	3.87497e-09	1.2846e-07
Cd14	912.22	312.22	612.219	1.54614	0.256615	6.02514	1.68959e-09	6.14859e-08
Cd163	4366.07	1683.46	3024.77	1.3749	0.187147	7.34664	2.0325e-13	1.41497e-11
Cd180	384.97	81.6	233.284	2.23986	0.395343	5.66561	1.46507e-08	4.29645e-07
Cd2	39.63	6.33	22.9828	2.64178	1.15516	2.28694	0.0221995	0.0969345
Cd200	4796.74	1129.89	2963.31	2.08596	0.163696	12.7429	3.4149e-37	2.02516e-34
Cd200r1	105.43	37.76	71.5936	1.48269	0.619932	2.3917	0.0167707	0.0789336
Cd22	167.18	17.92	92.5463	3.23096	0.992281	3.25609	0.00112958	0.0093039
Cd226	43.54	225.05	134.293	-2.37321	0.591798	-4.01018	6.06735e-05	0.000768595
Cd244	110.94	29.71	70.3249	1.89388	0.706175	2.68188	0.00732092	0.0418951
Cd300le	434.38	128.71	281.546	1.75182	0.347241	5.04498	4.53577e-07	1.00591e-05
Cd33	129.21	24.06	76.6337	2.41844	0.629055	3.84456	0.000120768	0.00140486
Cd36	2173.62	4631.79	3402.7	-1.09147	0.212485	-5.13671	2.79592e-07	6.507e-06
Cd37	199.23	35.53	117.377	2.49044	0.530306	4.69623	2.65009e-06	4.96877e-05
Cd38	562.28	218.88	390.575	1.35864	0.416537	3.26174	0.0011073	0.00915338
Cd3eap	619.93	299.71	459.818	1.04758	0.275574	3.80145	0.00014385	0.00163125
Cd4	2564.37	826.28	1695.32	1.63456	0.273961	5.96638	2.42575e-09	8.55531e-08
Cd44	4982.2	1567.25	3274.72	1.66798	0.178795	9.32901	1.06863e-20	1.5698e-18
Cd53	267.15	67.12	167.138	1.98812	0.567267	3.50474	0.000457061	0.00436663
Cd55	1898.19	369.55	1133.87	2.36077	0.220772	10.6932	1.09483e-26	3.07551e-24
Cd68	719.44	155.53	437.485	2.20927	0.328123	6.73305	1.6614e-11	8.75076e-10
Cd69	15.98	0	7.99014	6.54266	2.0281	3.226	0.00125533	0.0101774
Cd74	7111.85	1468.81	4290.33	2.27533	0.241179	9.4342	3.93978e-21	6.24592e-19
Cd80	186.75	45.81	116.278	2.03347	0.479133	4.24406	2.1951e-05	0.000316364
Cd81	3874.46	6265.2	5069.83	-0.693115	0.142892	-4.85062	1.23077e-06	2.47887e-05
Cd82	739.66	288.81	514.237	1.35618	0.25592	5.29922	1.16297e-07	2.90054e-06
Cd84	191.59	53.36	122.475	1.84818	0.485004	3.81064	0.000138607	0.00157514
Cdc14a	270.99	417.05	344.016	-0.622229	0.256455	-2.42627	0.0152549	0.0735062
Cdc20	187.77	49.28	118.527	1.92772	0.465017	4.14548	3.39106e-05	0.000462502
Cdc25c	110.49	16.77	63.6298	2.72679	1.05968	2.57324	0.0100753	0.0535786
Cdc42ep2	201.75	421.5	311.624	-1.06256	0.319752	-3.32308	0.0008903	0.00765601
Cdc42ep3	864.07	1461.31	1162.69	-0.757722	0.177322	-4.27315	1.9273e-05	0.0002839
Cdc42ep5	229.04	117.5	173.273	0.965499	0.490099	1.97001	0.0488374	0.173543
Cdc6	75.64	4.72	40.1784	4.00355	1.37548	2.91066	0.00360662	0.0238043
Cdc7	101.73	27.68	64.7058	1.87239	0.644414	2.90557	0.00366581	0.0240561
Cdca2	118.4	31.17	74.781	1.92349	0.572748	3.35834	0.00078411	0.00689087
Cdca3	188.12	24.1	106.107	2.95731	0.958496	3.08536	0.00203303	0.0150291
Cdca7	125.37	49.58	87.4732	1.33511	0.54141	2.46598	0.0136638	0.0675054
Cdca8	125.98	53.81	89.8935	1.22768	0.422128	2.90831	0.00363391	0.0239252
Cdh13	10481.4	6016.78	8249.11	0.800581	0.170929	4.68371	2.81723e-06	5.25751e-05
Cdh16	105.85	18.16	62.0038	2.55192	1.09248	2.33589	0.0194969	0.0886636
Cdh2	1008	1666.79	1337.4	-0.726024	0.366931	-1.97864	0.0478563	0.171082
Cdh20	0	32.86	16.4278	-7.39906	2.39542	-3.08884	0.00200941	0.0149026
Cdh3	67.24	234.52	150.879	-1.80017	0.532779	-3.37884	0.000727923	0.00647888
Cdh4	3.06	174.08	88.5659	-5.80801	0.93256	-6.22803	4.72344e-10	1.92938e-08
Cdhr2	0	31.99	15.9952	-7.35972	1.67321	-4.39857	1.08968e-05	0.000173267
Cdip1	467.27	843.61	655.442	-0.853009	0.278261	-3.0655	0.00217307	0.0158468
Cdk1	191.6	28.57	110.086	2.74361	0.526835	5.20773	1.91162e-07	4.58217e-06
Cdkl1	81.15	22.11	51.6298	1.87622	0.642709	2.91924	0.00350891	0.0232841
Cdkl5	708.43	1250.39	979.412	-0.8198	0.247714	-3.30947	0.000934743	0.007957
Cdkn3	149.47	20.78	85.1258	2.85817	0.698732	4.09051	4.30424e-05	0.000569583
Cdnf	24.07	99.56	61.8141	-2.04697	0.842155	-2.43063	0.0150726	0.0728689
Cds2	1349.92	2070.57	1710.25	-0.617553	0.18431	-3.35063	0.00080629	0.00705482
Cdt1	113.46	35.54	74.4973	1.6702	0.56379	2.96245	0.00305205	0.0208152
Cdv3	3041.21	1963.49	2502.35	0.630992	0.129966	4.85504	1.20361e-06	2.43337e-05
Ceacam1	77.94	153.58	115.76	-0.979555	0.467732	-2.09427	0.0362362	0.140013
Cebpd	1987.09	864.92	1426.01	1.19927	0.17261	6.94782	3.70973e-12	2.12144e-10
Cecr5	100.69	203.33	152.012	-1.01442	0.437533	-2.31851	0.0204218	0.0914156
Cemip	802.69	147.37	475.034	2.44933	0.34741	7.05027	1.78565e-12	1.07894e-10
Cenpe	842.19	268.11	555.15	1.65211	0.236881	6.97444	3.07095e-12	1.7946e-10
Cenpf	1187.19	213.98	700.583	2.46979	0.189598	13.0264	8.65716e-39	6.02689e-36
Cenpi	42.23	3.55	22.8891	3.60288	1.5135	2.3805	0.0172891	0.0808273
Cenpt	43.78	8.69	26.2349	2.31726	0.868947	2.66675	0.00765892	0.0431919
Cenpu	60.68	0	30.3376	8.46701	1.44636	5.854	4.79887e-09	1.54918e-07
Cenpv	31.57	105.79	68.684	-1.74181	0.566829	-3.0729	0.00211988	0.0155633
Cep128	766.43	479.35	622.889	0.67586	0.248157	2.72352	0.00645913	0.0379397
Cep55	155.92	14.28	85.098	3.43263	0.654133	5.24761	1.54084e-07	3.74954e-06
Cep57	549.09	858.14	703.618	-0.643463	0.274316	-2.3457	0.0189913	0.0870208
Cep70	43.02	145.19	94.1065	-1.75421	0.48646	-3.60607	0.000310866	0.00313845
Cercam	1519.52	1009.02	1264.27	0.591485	0.19833	2.98232	0.0028607	0.0197352
Cerk	2236.93	1287.93	1762.43	0.796257	0.18868	4.22014	2.44147e-05	0.000345649
Cers1	24.28	0	12.1392	7.14436	3.15526	2.26427	0.0235574	0.101425
Cers4	910.17	1376.59	1143.38	-0.596417	0.148132	-4.02627	5.66696e-05	0.000722448
Cers6	394.14	177.01	285.575	1.15741	0.29976	3.86111	0.000112873	0.00133087
Ces1d	701.77	2505.85	1603.81	-1.83601	0.331621	-5.53647	3.08634e-08	8.44759e-07
Ces2g	26.16	83.11	54.6318	-1.67176	0.71533	-2.33705	0.0194365	0.0884909
Cetn2	259.58	401.74	330.662	-0.629578	0.278369	-2.26167	0.0237177	0.102061
Cfap157	93.79	38.9	66.3433	1.27381	0.577697	2.20498	0.0274551	0.114155
Cfb	3131.66	1848.17	2489.92	0.760412	0.198467	3.83143	0.000127399	0.00146761
Cfd	2430.58	840.36	1635.47	1.53268	0.219837	6.97187	3.12763e-12	1.81682e-10
Cfi	21.29	0	10.6446	6.95665	2.50736	2.77449	0.00552881	0.033495
Cfp	526.44	124.93	325.688	2.07147	0.32315	6.41027	1.45267e-10	6.49724e-09
Cgnl1	8969.19	29120.7	19044.9	-1.69902	0.13619	-12.4754	1.01688e-35	5.8151e-33
Cgref1	920.71	365.35	643.032	1.33476	0.276279	4.83119	1.35722e-06	2.71308e-05
Chchd3	1611.53	2834.06	2222.8	-0.814679	0.250098	-3.25744	0.00112421	0.0092692
Chchd4	33.18	103.47	68.3226	-1.63867	0.610063	-2.68607	0.00722987	0.0415225
Chchd6	155.52	81.04	118.284	0.938012	0.415396	2.25812	0.0239383	0.102853
Chek1	124.22	49.73	86.9769	1.3223	0.490685	2.69479	0.00704321	0.0406986
Chi3l1	2046.89	139.8	1093.34	3.87099	0.211942	18.2644	1.59e-74	2.82879e-71
Chic1	130.29	216.86	173.572	-0.733145	0.337923	-2.16956	0.0300403	0.121965
Chordc1	482.36	795.58	638.971	-0.722382	0.253192	-2.8531	0.00432956	0.0275646
Chp2	392.8	144.03	268.411	1.4485	0.410059	3.53243	0.000411765	0.00399586
Chpf	2992.86	1717.86	2355.36	0.801013	0.20756	3.85919	0.000113763	0.0013394
Chpf2	1155.11	597.18	876.141	0.951281	0.155404	6.12135	9.27831e-10	3.55417e-08
Chpt1	869.59	1858.44	1364.01	-1.09603	0.279457	-3.922	8.7818e-05	0.00106445
Chrdl1	412.25	673.28	542.764	-0.706919	0.263712	-2.68065	0.00734797	0.042006
Chrnb1	16.22	47.4	31.8107	-1.54893	0.692138	-2.2379	0.0252279	0.10701
Chst1	85.07	192.49	138.782	-1.17797	0.449469	-2.62081	0.00877221	0.0481194
Chst11	874.13	190.26	532.194	2.19763	0.338446	6.4933	8.39757e-11	3.87498e-09
Chst14	353.94	202.53	278.238	0.805713	0.286375	2.81349	0.00490066	0.0304854
Chst7	78.66	21.72	50.188	1.8558	0.620049	2.99299	0.00276259	0.0192324
Chsy3	95.28	21.01	58.143	2.17624	1.039	2.09456	0.0362099	0.139945
Cib2	95.73	197.26	146.495	-1.04025	0.455817	-2.28216	0.0224798	0.0977849
Cidea	950.5	2335.34	1642.92	-1.29691	0.335441	-3.86629	0.000110503	0.00130484
Cidec	788.09	1804.37	1296.23	-1.19491	0.320097	-3.73295	0.000189252	0.00207698
Ciita	482.42	80.25	281.336	2.58475	0.354833	7.28442	3.23061e-13	2.18264e-11
Cilp	1542.75	982.31	1262.53	0.651018	0.245785	2.64873	0.00807958	0.0451711
Cipc	428.77	670.02	549.395	-0.644491	0.280589	-2.29692	0.0216232	0.0950205
Cisd1	487.43	900.14	693.788	-0.885691	0.35063	-2.526	0.0115371	0.0596292
Cit	496.64	194.6	345.622	1.35132	0.278913	4.84494	1.26649e-06	2.5464e-05
Cited1	3.08	113.54	58.3136	-5.23478	1.33829	-3.91154	9.17111e-05	0.00110661
Ckap2	379.32	79.12	229.215	2.26427	0.358071	6.32353	2.55654e-10	1.08294e-08
Ckap2l	200.69	53.72	127.204	1.89697	0.556427	3.4092	0.00065154	0.0059074
Ckap4	3720.06	1325.87	2522.97	1.48853	0.133695	11.1337	8.59892e-29	2.80992e-26
Ckm	60.7	1937.97	999.334	-4.99648	2.30301	-2.16954	0.0300418	0.121965
Cks2	96.29	11.4	53.8459	3.06618	1.0204	3.00488	0.00265682	0.0186257
Clcf1	134.13	35.24	84.6886	1.92609	0.418513	4.60222	4.1802e-06	7.50374e-05
Clcn3	555.89	857.18	706.532	-0.625843	0.288642	-2.16823	0.0301411	0.122275
Clcn4	21.9	110.61	66.2572	-2.33251	1.08076	-2.15821	0.0309113	0.124704
Clcnkb	40.1	152.63	96.366	-1.92804	0.9064	-2.12714	0.0334083	0.132278
Cldn1	4.71	67.63	36.1691	-3.83413	1.37834	-2.78169	0.0054076	0.0329477
Cldn2	0	16.61	8.30614	-6.41257	2.69457	-2.37981	0.0173213	0.0809542
Cldn22	46.28	120.97	83.6259	-1.38328	0.67973	-2.03504	0.0418469	0.155429
Cldn5	353.94	690.28	522.108	-0.963753	0.244461	-3.94236	8.06834e-05	0.000986938
Clec10a	1517.47	463.03	990.249	1.7128	0.230114	7.44327	9.82248e-14	7.24782e-12
Clec11a	2913.27	743.22	1828.24	1.97084	0.228708	8.61725	6.85814e-18	8.13427e-16
Clec12a	59.19	8.78	33.9832	2.76605	1.12661	2.45519	0.0140809	0.0689701
Clec2d	22.79	0	11.394	7.05279	1.89104	3.72958	0.0001918	0.00209346
Clec2d2	17.32	0	8.66161	6.65724	2.00637	3.31805	0.000906478	0.00775151
Clec2l	28.24	70.54	49.3942	-1.31685	0.572938	-2.29842	0.0215381	0.094858
Clec4a	55.76	14.45	35.106	1.94612	0.928273	2.0965	0.0360382	0.139484
Clec4a1	248.57	67.83	158.199	1.87445	0.440018	4.25994	2.04483e-05	0.000298195
Clec4a2	50.77	0	25.3858	8.21	1.50244	5.46443	4.64407e-08	1.2291e-06
Clec4a3	324.06	44.93	184.498	2.85306	0.372076	7.66794	1.7478e-14	1.41342e-12
Clec7a	280.42	36.83	158.627	2.92778	0.568945	5.14598	2.66123e-07	6.2116e-06
Clic1	3343.27	1600.78	2472.02	1.06252	0.173737	6.11566	9.61559e-10	3.66583e-08
Clic3	18.95	63.58	41.261	-1.74847	0.737436	-2.37102	0.0177392	0.0825937
Clic5	394.9	1213.37	804.133	-1.61963	0.441297	-3.67017	0.000242393	0.00253507
Clip2	1710.72	815.67	1263.2	1.06919	0.181934	5.87681	4.18251e-09	1.36954e-07
Clip4	0	73.13	36.5655	-8.5522	3.9079	-2.18844	0.0286377	0.117757
Clmn	316.74	1104.28	710.51	-1.80114	0.302611	-5.952	2.64891e-09	9.2406e-08
Clock	1764.06	2771.06	2267.56	-0.651466	0.146522	-4.4462	8.74013e-06	0.000142657
Clpx	819	1782.16	1300.58	-1.12185	0.224086	-5.00634	5.54742e-07	1.21512e-05
Clstn3	3.47	62.72	33.0951	-4.20508	1.31536	-3.1969	0.00138914	0.0110441
Cluh	1647.92	2499.51	2073.72	-0.601045	0.211524	-2.8415	0.0044902	0.028373
Clybl	73.54	216.05	144.791	-1.55582	0.730303	-2.13037	0.033141	0.131578
Cmah	79.19	270.19	174.694	-1.77075	0.5917	-2.99265	0.00276566	0.0192371
Cmbl	103.81	365.03	234.42	-1.81279	0.50063	-3.62102	0.000293444	0.00297947
Cmtm3	471.48	197.98	334.732	1.25309	0.350929	3.57078	0.000355924	0.00352986
Cmtm6	1567.86	978.32	1273.09	0.680542	0.173583	3.92056	8.83449e-05	0.00106922
Cmtm7	405.54	187.11	296.326	1.11592	0.329613	3.38554	0.000710382	0.00634784
Cndp2	1566.09	974.64	1270.36	0.683629	0.18358	3.72388	0.000196185	0.00213405
Cnn1	10676	17602.8	14139.4	-0.721408	0.31946	-2.25821	0.0239325	0.102853
Cnn3	7108.12	4160.3	5634.21	0.772938	0.23132	3.34142	0.000833505	0.00726119
Cnnm2	1891.58	509.3	1200.44	1.89392	0.223174	8.48628	2.13356e-17	2.35604e-15
Cnppd1	853.24	560.98	707.109	0.605416	0.174278	3.47386	0.000513037	0.00481521
Cnpy3	1066.92	709.72	888.32	0.587137	0.176666	3.32342	0.000889198	0.00765064
Cnpy4	1941.14	1209.39	1575.27	0.682892	0.139721	4.88753	1.0211e-06	2.09614e-05
Cntfr	68.3	239.07	153.686	-1.80729	0.704218	-2.56637	0.0102768	0.0544517
Cntn2	1716.47	4247.23	2981.85	-1.3068	0.280473	-4.65926	3.17351e-06	5.85417e-05
Cntnap1	164.55	310.86	237.704	-0.91802	0.315197	-2.91253	0.00358514	0.0237114
Coa3	195.77	307.42	251.593	-0.649864	0.288904	-2.24942	0.0244861	0.104552
Coa5	998.21	1781.51	1389.86	-0.836151	0.223118	-3.74758	0.000178551	0.00197715
Cobll1	513.26	895.39	704.323	-0.803517	0.296194	-2.7128	0.00667168	0.0390735
Coch	11.11	76.79	43.947	-2.78728	1.13262	-2.46091	0.0138585	0.0682013
Col11a1	1637.3	190.73	914.016	3.10172	0.487975	6.35631	2.06656e-10	8.96743e-09
Col11a2	74.11	146.89	110.5	-0.985841	0.472362	-2.08705	0.0368841	0.141866
Col12a1	16000.2	2504.62	9252.39	2.67533	0.649082	4.12172	3.76057e-05	0.000506003
Col16a1	6113.62	1593.38	3853.5	1.93991	0.201994	9.6038	7.70533e-22	1.37086e-19
Col17a1	524.66	248.61	386.638	1.07877	0.378047	2.85352	0.00432372	0.0275514
Col18a1	45753.6	24038.6	34896.1	0.928573	0.132011	7.03405	2.00628e-12	1.19868e-10
Col4a1	62127.5	26625.5	44376.5	1.22245	0.102649	11.9091	1.06178e-32	4.47401e-30
Col4a2	31616.2	15403.3	23509.8	1.03747	0.117411	8.83622	9.9012e-19	1.24833e-16
Col4a3	872.67	1426.95	1149.81	-0.709429	0.260292	-2.72551	0.00642018	0.0377663
Col4a5	21433.8	35017.2	28225.5	-0.708136	0.177124	-3.99796	6.38902e-05	0.000803621
Col4a6	2266.04	6332.5	4299.27	-1.48254	0.205055	-7.22998	4.83063e-13	3.17e-11
Col5a1	59310.4	33190.4	46250.4	0.837554	0.141729	5.90956	3.43024e-09	1.15147e-07
Col5a2	52371.1	20075.5	36223.3	1.38336	0.123771	11.1768	5.29618e-29	1.76672e-26
Col6a3	31170.8	16429	23799.9	0.92392	0.141334	6.53714	6.2708e-11	2.98834e-09
Col6a6	442.29	2982	1712.14	-2.75233	0.397049	-6.93197	4.15027e-12	2.36492e-10
Col8a1	9916.57	751	5333.79	3.72412	0.220465	16.8921	5.14096e-64	6.85976e-61
Col8a2	1434.03	174.06	804.041	3.04121	0.333807	9.11069	8.18585e-20	1.13975e-17
Colgalt1	2494.86	1337.7	1916.28	0.898931	0.141273	6.36307	1.97757e-10	8.628e-09
Comp	885.63	145.06	515.344	2.61258	0.262584	9.94951	2.53432e-23	5.27007e-21
Coq10a	196.77	325.54	261.156	-0.72526	0.26469	-2.74003	0.00614335	0.0365135
Coq3	125.64	249.61	187.626	-0.989895	0.345494	-2.86516	0.00416804	0.0268026
Coq5	329.52	557.58	443.55	-0.759984	0.32512	-2.33755	0.0194107	0.0884222
Coq9	606.6	1479.6	1043.1	-1.28663	0.374014	-3.44006	0.000581589	0.00534888
Coro1a	455.11	71.62	263.363	2.66249	0.345623	7.70346	1.32429e-14	1.09302e-12
Coro6	131.98	506.29	319.132	-1.93963	0.619563	-3.13064	0.00174428	0.0132555
Cotl1	1730.85	408.5	1069.67	2.08305	0.238157	8.74653	2.20021e-18	2.70998e-16
COX1	158434	299530	228982	-0.918819	0.23922	-3.84089	0.000122588	0.00142238
COX2	71737.5	131143	101440	-0.87035	0.261259	-3.33137	0.00086421	0.00747582
COX3	114829	196141	155485	-0.772408	0.216434	-3.56879	0.000358634	0.00355129
Cox4i1	3694.09	6739.09	5216.59	-0.867468	0.247705	-3.50201	0.000461755	0.00440096
Cox5a	433.2	817.84	625.52	-0.917401	0.392133	-2.33951	0.0193088	0.0880582
Cox5b	1308.38	2756.74	2032.56	-1.07548	0.344028	-3.12613	0.00177123	0.0134348
Cox6c	1655.48	2961.76	2308.62	-0.839459	0.318743	-2.63365	0.00844722	0.0468017
Cox7a2	655.76	1065.96	860.857	-0.701465	0.329604	-2.1282	0.0333201	0.132093
Cox7b	1207.92	2903.83	2055.88	-1.26564	0.362512	-3.49131	0.000480659	0.00455943
Cox8a	958.88	1614.69	1286.78	-0.751801	0.140889	-5.33614	9.49452e-08	2.4208e-06
Cpa6	0	57.99	28.9968	-8.21952	1.71822	-4.78374	1.72062e-06	3.36803e-05
Cpeb1	109.47	38.99	74.2258	1.48806	0.476457	3.12317	0.00178914	0.0135514
Cpm	360.62	51.77	206.194	2.79576	0.381092	7.33619	2.19764e-13	1.51024e-11
Cpne5	43.08	229.33	136.206	-2.40755	0.427795	-5.62782	1.82505e-08	5.26535e-07
Cpne8	1107.51	539.53	823.523	1.03709	0.239332	4.33327	1.46912e-05	0.000225321
Cpq	2504.8	1589.74	2047.27	0.656148	0.148191	4.4277	9.52412e-06	0.000154196
Cpt1a	1096.06	1940	1518.03	-0.823429	0.222892	-3.6943	0.000220495	0.00235215
Cpt1b	513.93	1985.77	1249.85	-1.95002	0.675684	-2.88599	0.00390184	0.0253665
Cpt2	587.63	947.31	767.471	-0.688788	0.193258	-3.56408	0.00036513	0.0036067
Cpxm1	1049.02	497.24	773.128	1.07674	0.299679	3.59297	0.000326926	0.00327163
Cpxm2	1276.85	496.44	886.643	1.36316	0.340791	3.99999	6.33449e-05	0.000798016
Cpz	379.37	664.96	522.165	-0.808766	0.228278	-3.5429	0.000395754	0.00386391
Crabp2	477.69	180.64	329.166	1.40445	0.412126	3.40781	0.000654861	0.00592109
Cradd	53.48	104.93	79.2046	-0.970145	0.459889	-2.10952	0.0348997	0.136362
Crebl2	541.41	856.7	699.055	-0.661551	0.235363	-2.81076	0.0049424	0.0306838
Crebrf	2035.19	3643.08	2839.14	-0.839589	0.135137	-6.21286	5.20301e-10	2.10913e-08
Creld2	909.58	548.75	729.166	0.729904	0.212928	3.42793	0.000608193	0.00557754
Crhr2	32.55	245.7	139.123	-2.91061	0.561351	-5.18501	2.16004e-07	5.10115e-06
Crispld1	82.68	185.73	134.205	-1.16733	0.440227	-2.65166	0.00800972	0.0448276
Crispld2	5005.13	14820.3	9912.72	-1.56602	0.152811	-10.2481	1.2071e-24	2.84236e-22
Crlf1	2284.03	1093.02	1688.52	1.06364	0.27106	3.924	8.70907e-05	0.00105724
Crlf2	133.72	55.53	94.6231	1.26993	0.511637	2.4821	0.0130612	0.065192
Crocc2	355.35	59.25	207.299	2.58063	0.457632	5.6391	1.70943e-08	4.94962e-07
Crtc1	646.62	999.56	823.092	-0.627897	0.190786	-3.2911	0.000997969	0.00838818
Crtc3	491.78	876.77	684.27	-0.833306	0.232284	-3.58744	0.000333936	0.00333561
Cryl1	120.21	213.87	167.04	-0.829771	0.417137	-1.98921	0.0466785	0.168223
Cs	2547.92	4449.96	3498.94	-0.804562	0.281404	-2.8591	0.00424843	0.0271886
Csad	948	1425.85	1186.92	-0.588179	0.25628	-2.29506	0.0217296	0.0954029
Csdc2	38.05	389.63	213.841	-3.3587	0.440178	-7.63032	2.34172e-14	1.84249e-12
Csf1r	3890.65	1162.77	2526.71	1.74282	0.180391	9.66131	4.40185e-22	7.91938e-20
Csf2ra	617.22	192.11	404.666	1.68561	0.265437	6.35034	2.14838e-10	9.22247e-09
Csf2rb	687.92	233.37	460.645	1.55768	0.220595	7.06124	1.6502e-12	1.00851e-10
Csf3r	105.4	32.04	68.718	1.7218	0.617064	2.79031	0.00526581	0.0322556
Csgalnact1	1208.17	517.83	863.003	1.22169	0.258609	4.7241	2.31134e-06	4.3954e-05
Csgalnact2	2183.67	1455.11	1819.39	0.585996	0.158601	3.69478	0.000220081	0.00234929
Cst3	15620.8	9953.77	12787.3	0.650159	0.127863	5.0848	3.68013e-07	8.37541e-06
Cst7	95.61	26.77	61.1922	1.84532	0.661986	2.78754	0.00531091	0.0324574
Cstf3	225.24	403.58	314.41	-0.842068	0.282995	-2.97556	0.00292453	0.020115
Ctgf	57697.2	14214.6	35955.9	2.02119	0.228962	8.82764	1.06907e-18	1.33734e-16
Cthrc1	2289.55	816.13	1552.84	1.48856	0.223504	6.66013	2.73587e-11	1.39958e-09
Ctif	634.46	380.3	507.379	0.73885	0.2841	2.60067	0.00930419	0.0505012
Ctnna2	3.7	51.18	27.441	-3.77734	1.41196	-2.67525	0.00746746	0.0424908
Ctnna3	461.54	982.14	721.837	-1.08975	0.340805	-3.19758	0.00138587	0.0110236
Ctnnd2	12	0	6.00046	6.1287	2.21449	2.76754	0.00564811	0.0341016
Ctsa	6267.64	3105.48	4686.56	1.01334	0.140226	7.22648	4.95682e-13	3.23954e-11
Ctsb	15287.5	7878.34	11582.9	0.956345	0.132904	7.19576	6.21125e-13	4.0265e-11
Ctse	90.4	21.09	55.7454	2.08968	0.645262	3.2385	0.00120161	0.0098315
Ctsk	2406.03	704.58	1555.31	1.77169	0.229661	7.71435	1.21602e-14	1.01411e-12
Ctss	1461.65	452.06	956.855	1.69357	0.208424	8.1256	4.45147e-16	4.5112e-14
Ctsw	53.82	2.2	28.0087	4.6139	1.42193	3.24481	0.00117528	0.00963077
Ctsz	1073.88	244.4	659.141	2.13577	0.223122	9.57217	1.04684e-21	1.82196e-19
Cuedc1	548.29	988	768.147	-0.848603	0.286204	-2.96503	0.00302657	0.0206766
Cul5	1204.51	1841.71	1523.11	-0.612897	0.152506	-4.01885	5.84838e-05	0.000743798
Cuzd1	0	12.72	6.35832	-6.03046	2.96278	-2.03541	0.0418098	0.155327
Cx3cl1	401.39	843.86	622.628	-1.07267	0.30823	-3.48009	0.000501245	0.00471559
Cx3cr1	146.52	23.97	85.2433	2.61749	0.600454	4.35919	1.30546e-05	0.000202943
Cxcl10	64.73	13.67	39.1973	2.23872	0.676607	3.30874	0.00093716	0.00797333
Cxcl12	3194.61	1635.9	2415.25	0.965764	0.259825	3.71698	0.000201615	0.00218421
Cxcl13	201.83	22.87	112.347	3.14167	0.568338	5.52782	3.24233e-08	8.85941e-07
Cxcl14	568.28	250.58	409.43	1.18047	0.279098	4.22958	2.34129e-05	0.000333827
Cxcl16	1928.77	458.07	1193.42	2.07543	0.211446	9.81539	9.6665e-23	1.82094e-20
Cxcl17	9.27	36.45	22.8591	-1.96936	0.93174	-2.11363	0.0345467	0.135214
Cxcl9	131.87	44.1	87.9845	1.58086	0.559613	2.82491	0.00472936	0.0295922
Cxcr4	490.34	225.42	357.881	1.11964	0.285777	3.91786	8.93376e-05	0.00108042
Cyb561d2	126.03	45.44	85.7351	1.4651	0.552108	2.65365	0.00796254	0.0445947
Cyba	943.53	445.86	694.692	1.08275	0.180299	6.00529	1.90995e-09	6.88785e-08
Cybb	955.79	279.99	617.89	1.77103	0.278776	6.35287	2.11332e-10	9.12088e-09
Cyc1	717.01	1766.74	1241.88	-1.30127	0.399265	-3.25917	0.00111738	0.00922238
Cycs	759.31	1665.18	1212.25	-1.13315	0.40134	-2.82341	0.00475158	0.0296849
Cygb	3752.53	1588.54	2670.53	1.24024	0.190644	6.50553	7.74191e-11	3.59315e-09
Cyp26a1	53.2	0	26.5975	8.27759	1.50236	5.50973	3.59381e-08	9.75324e-07
Cyp26b1	313.59	703.56	508.575	-1.16458	0.273404	-4.25955	2.04834e-05	0.000298436
Cyp27a1	229.73	483.69	356.713	-1.07367	0.342153	-3.13797	0.00170124	0.0130025
Cyp2d1	51.77	4.4	28.0876	3.55663	1.45955	2.43679	0.0148181	0.071801
Cyp2d4	12.51	110.87	61.687	-3.13989	0.926562	-3.38876	0.000702103	0.00629455
Cyp2j3	62.27	210.64	136.455	-1.75676	0.419694	-4.1858	2.84164e-05	0.000395311
Cyp4b1	179.8	343.76	261.783	-0.934774	0.350012	-2.67069	0.00756958	0.0429193
Cyp4f17	100.48	47.49	73.9871	1.07819	0.512558	2.10356	0.0354172	0.137713
Cyp51	1333.03	702.65	1017.84	0.924541	0.303105	3.05023	0.00228667	0.0165259
Cyp7b1	105.56	37.25	71.4044	1.49776	0.524085	2.85787	0.00426502	0.0272729
Cys1	449.95	157.26	303.606	1.51467	0.528175	2.86775	0.00413402	0.0266267
Cysltr1	267.88	135.98	201.927	0.979263	0.381443	2.56726	0.0102507	0.0543311
CYTB	73102.8	136005	104554	-0.895666	0.260026	-3.44453	0.000572055	0.00528243
Cyth4	1174.18	224.77	699.474	2.38767	0.299318	7.97701	1.49921e-15	1.39566e-13
Cytip	150.78	65.24	108.01	1.21111	0.415142	2.91733	0.00353039	0.0233897
Cytl1	251.51	1640.5	946.009	-2.70455	0.45757	-5.91069	3.40686e-09	1.14602e-07
Daam1	2170.05	3924.73	3047.39	-0.854666	0.140308	-6.09136	1.11955e-09	4.19817e-08
Dab1	91.1	368.93	230.012	-2.01738	0.329358	-6.12519	9.05781e-10	3.47802e-08
Dab2	3376.21	1721.75	2548.98	0.971736	0.130647	7.43786	1.02331e-13	7.51619e-12
Dagla	357.01	208.32	282.666	0.777537	0.260004	2.99048	0.00278535	0.0193243
Dbf4	24.1	0	12.0499	7.13439	1.79403	3.97674	6.98676e-05	0.000874001
Dbt	496	772.48	634.24	-0.639855	0.227953	-2.80696	0.00500109	0.0309897
Dclk1	1433.89	948.91	1191.4	0.594653	0.172551	3.44624	0.00056845	0.00526129
Dcp1b	254.91	471.55	363.232	-0.886563	0.267312	-3.31659	0.000911242	0.00778273
Dctd	169.72	45.8	107.759	1.88425	0.448896	4.19752	2.69849e-05	0.000378024
Dcxr	125.12	269.12	197.118	-1.10522	0.398789	-2.77143	0.00558106	0.0337605
Ddost	2017.38	1330.27	1673.83	0.600409	0.140176	4.28325	1.8418e-05	0.00027357
Ddx11	181.15	62.86	122.006	1.52557	0.496379	3.07341	0.00211629	0.015544
Ddx54	1532.39	955.83	1244.11	0.68051	0.180839	3.76307	0.000167842	0.0018715
Ddx60	374.78	102.68	238.731	1.86726	0.459566	4.06309	4.84283e-05	0.000630948
Decr1	764.34	1472.75	1118.55	-0.946532	0.35511	-2.66547	0.00768819	0.0433005
Decr2	38.07	94.88	66.4756	-1.31827	0.560736	-2.35097	0.0187246	0.0861393
Def6	266.76	149.24	207.999	0.840037	0.390264	2.15248	0.0313593	0.126099
Dennd1b	553.36	953.45	753.407	-0.785489	0.211201	-3.71916	0.00019989	0.00216992
Dennd1c	150.43	54.34	102.386	1.47066	0.449103	3.27465	0.00105793	0.00880434
Dennd4a	1252.03	2079.46	1665.75	-0.731335	0.17094	-4.27831	1.88321e-05	0.000277917
Depdc1	54.98	0	27.4899	8.32539	1.51657	5.48963	4.02773e-08	1.08027e-06
Depdc1b	31.83	0	15.9129	7.53514	1.66966	4.51297	6.39273e-06	0.000108894
Deup1	11.28	0	5.63861	6.03904	2.97235	2.03174	0.0421802	0.156376
Dgat2	1268.1	2654.62	1961.36	-1.06574	0.386016	-2.76087	0.00576482	0.0346622
Dgkb	35.94	186.18	111.064	-2.37015	0.584557	-4.05461	5.02185e-05	0.000650566
Dgkh	1097.36	571.21	834.285	0.940711	0.20621	4.56192	5.06886e-06	8.87993e-05
Dguok	177.94	308.13	243.038	-0.793614	0.282139	-2.81284	0.00491056	0.0305233
Dhh	36.92	127.82	82.3695	-1.79259	0.525871	-3.40879	0.000652511	0.00590951
Dhrs3	540.99	962.58	751.787	-0.831116	0.263335	-3.15611	0.00159888	0.0123797
Dhtkd1	396.11	631.29	513.699	-0.67121	0.260134	-2.58025	0.00987289	0.0526949
Diaph3	705.27	312.08	508.675	1.17824	0.332234	3.54642	0.000390501	0.00381961
Dio2	3365.54	583.2	1974.37	2.52928	0.352629	7.17263	7.35708e-13	4.71206e-11
Dio3	648.9	3.28	326.087	7.59672	0.683955	11.1071	1.15917e-28	3.63935e-26
Dkk3	20683.5	12158.8	16421.2	0.76655	0.137902	5.55868	2.71829e-08	7.56962e-07
Dlat	606.85	1288.38	947.619	-1.08661	0.305988	-3.55115	0.000383556	0.00376087
Dld	1513.84	2576.29	2045.06	-0.767323	0.266374	-2.88062	0.0039689	0.0257705
Dlec1	0	12.83	6.41737	-6.04342	2.85118	-2.11962	0.0340382	0.133912
Dlgap5	475.09	121.76	298.426	1.96369	0.286932	6.84373	7.71552e-12	4.27477e-10
Dlk1	18.88	0	9.43991	6.7829	1.92131	3.53035	0.00041501	0.00401882
Dlst	2286	4035.22	3160.61	-0.820006	0.249869	-3.28174	0.00103167	0.00861715
Dmbt1	1018.3	363.99	691.145	1.48231	0.26957	5.49877	3.82443e-08	1.03092e-06
Dmd	6964.89	14847.5	10906.2	-1.09204	0.163867	-6.66418	2.66149e-11	1.36589e-09
Dmtn	123.13	387.42	255.275	-1.65573	0.379125	-4.36725	1.25821e-05	0.000196551
Dnah1	207.67	113.86	160.767	0.864328	0.358657	2.4099	0.0159567	0.0759282
Dnah5	0	15.21	7.6074	-6.28862	2.72527	-2.30752	0.0210259	0.093363
Dnaja3	795.82	1309.52	1052.67	-0.719418	0.187768	-3.83143	0.000127403	0.00146761
Dnaja4	602.85	1381.93	992.389	-1.19724	0.335091	-3.57289	0.000353061	0.00350641
Dnajb11	1030.93	684.38	857.654	0.590156	0.161335	3.65794	0.00025425	0.00263498
Dnajb4	2109.19	4427.3	3268.24	-1.0697	0.236256	-4.52771	5.96272e-06	0.000102661
Dnajc21	731.58	1145.66	938.622	-0.647171	0.215961	-2.9967	0.0027292	0.0190248
Dnajc27	248.23	413.41	330.818	-0.735938	0.27503	-2.67585	0.00745397	0.0424442
Dnajc28	98.19	271.17	184.678	-1.46636	0.416351	-3.52193	0.000428422	0.00412997
Dnajc30	88.77	210.93	149.853	-1.24707	0.53158	-2.34596	0.0189782	0.0870018
Doc2b	152.27	287.28	219.774	-0.91402	0.288305	-3.17032	0.00152272	0.0119052
Doc2g	43.11	217.68	130.397	-2.33621	0.729034	-3.20452	0.00135286	0.0108473
Dock2	901.44	203.98	552.712	2.14196	0.231116	9.26793	1.89798e-20	2.71344e-18
Dock5	2517.15	1132.97	1825.06	1.15085	0.172618	6.66702	2.61045e-11	1.34401e-09
Dock8	2436.52	748.61	1592.57	1.70224	0.13769	12.3629	4.14995e-35	2.21497e-32
Dok1	183.79	71.86	127.828	1.35301	0.393015	3.44264	0.000576068	0.0053103
Dok2	195.02	93.35	144.184	1.06336	0.428597	2.48103	0.0131003	0.065367
Dok3	101.57	10.92	56.2454	3.20408	1.08317	2.95805	0.00309589	0.0210405
Dok4	259.01	151.85	205.433	0.7713	0.389917	1.97811	0.047916	0.171219
Donson	166.91	83.36	125.132	0.998896	0.448928	2.22507	0.0260766	0.109843
Dpep1	134.07	428.41	281.238	-1.67341	0.36177	-4.62561	3.73489e-06	6.76506e-05
Dpp4	652.33	368.9	510.618	0.821334	0.286145	2.87035	0.00410023	0.0264672
Dpy19l1	2233.86	1220.18	1727.02	0.872734	0.180934	4.8235	1.41058e-06	2.80924e-05
Dpysl2	9632.05	5835.77	7733.91	0.722839	0.164743	4.38768	1.14567e-05	0.000181091
Dram1	608.84	134.72	371.78	2.17719	0.319944	6.80489	1.01129e-11	5.48906e-10
Drc3	90.32	203.73	147.026	-1.17311	0.43315	-2.70832	0.00676241	0.0394318
Dscaml1	10.59	0	5.29394	5.94708	3.01264	1.97405	0.0483764	0.172287
Dscc1	115.55	54.05	84.8009	1.09166	0.528106	2.06713	0.0387223	0.14689
Dse	2055.47	1335.53	1695.5	0.622554	0.177989	3.4977	0.000469282	0.00446739
Dsg1	12.54	0	6.26991	6.19018	2.30167	2.68942	0.00715755	0.0412402
Dsn1	112.48	20.51	66.4947	2.4588	0.67131	3.6627	0.000249574	0.00259492
Dtd2	21.88	70.46	46.1702	-1.68429	0.695958	-2.4201	0.0155164	0.0743704
Dtl	49.77	5.67	27.7237	3.15116	1.51997	2.07317	0.0381564	0.145232
Dtna	1718.92	4615.48	3167.2	-1.42479	0.225285	-6.32441	2.54205e-10	1.07966e-08
Dtx4	520.78	219.4	370.086	1.24674	0.280448	4.44553	8.76772e-06	0.000142962
Duox1	123.8	44.72	84.2571	1.46743	0.579354	2.53287	0.0113131	0.0588327
Dusp1	3221.6	6801.14	5011.37	-1.07794	0.503972	-2.13889	0.0324447	0.12946
Dusp10	175.2	506	340.597	-1.52994	0.31021	-4.93194	8.14185e-07	1.70576e-05
Dusp14	168.23	53.48	110.852	1.65937	0.600685	2.76246	0.00573679	0.0345719
Dusp18	1385.55	686.25	1035.9	1.01321	0.186839	5.42287	5.86485e-08	1.53444e-06
Dynll2	728.75	1151.02	939.883	-0.659673	0.246904	-2.67178	0.00754499	0.0428406
Dyrk1b	341.49	637.08	489.283	-0.89919	0.308404	-2.91562	0.00354982	0.0234972
E2f7	80.06	3.19	41.6279	4.69551	1.24223	3.7799	0.00015689	0.00176166
Ears2	40.62	96.29	68.4538	-1.24396	0.459605	-2.70658	0.00679798	0.0395815
Ears2l1	40.16	12.15	26.1549	1.72602	0.740157	2.33196	0.0197027	0.0893312
Ebf3	536.55	268.24	402.398	1.00176	0.26605	3.76529	0.000166353	0.00186009
Ech1	807.97	1711.46	1259.71	-1.08268	0.309115	-3.5025	0.000460912	0.00439554
Echdc2	225.71	351.77	288.738	-0.641053	0.262424	-2.44282	0.0145732	0.0708611
Eci2	292.33	531.12	411.727	-0.861398	0.244014	-3.53011	0.000415385	0.00401882
Ecscr	301.32	174.03	237.675	0.790519	0.328866	2.40377	0.0162268	0.0769619
Ecsit	391.62	756.28	573.951	-0.950538	0.368657	-2.57838	0.0099265	0.052938
Ect2	166.5	55.93	111.214	1.57541	0.427571	3.68455	0.000229111	0.0024327
Edem1	3062.08	1791.13	2426.61	0.773902	0.138828	5.57455	2.48177e-08	6.96429e-07
Edem2	255.79	112.3	184.043	1.18747	0.361896	3.28126	0.00103344	0.00862747
Ednra	400.29	972.66	686.472	-1.28002	0.229517	-5.57704	2.4464e-08	6.88432e-07
Eef2k	3835.53	5858.03	4846.78	-0.610839	0.190596	-3.20488	0.00135118	0.0108393
Eefsec	198.27	301.77	250.022	-0.60638	0.302799	-2.00258	0.0452224	0.164232
Eepd1	326.91	593.91	460.414	-0.861997	0.193067	-4.46477	8.01561e-06	0.000132726
Efcab2	46.79	90	68.3961	-0.944059	0.446188	-2.11583	0.034359	0.134743
Efcc1	148.45	257.09	202.768	-0.791266	0.402992	-1.96348	0.0495905	0.175169
Efemp2	2421.2	1488.77	1954.99	0.702224	0.193385	3.63122	0.000282087	0.00288612
Egln3	371.55	883.9	627.724	-1.25066	0.446379	-2.80178	0.0050821	0.0313824
Egr1	2061.49	5726.61	3894.05	-1.47392	0.630677	-2.33705	0.0194368	0.0884909
Egr2	486.72	166.24	326.481	1.55329	0.345648	4.49386	6.99444e-06	0.000117518
Ehbp1	1152.95	1814.9	1483.92	-0.654752	0.280694	-2.33262	0.0196679	0.0892638
Ehd1	1166.88	2354.19	1760.54	-1.01261	0.126052	-8.03321	9.49514e-16	9.1588e-14
Eif3h	1412.8	855.59	1134.19	0.723974	0.366309	1.9764	0.0481094	0.171795
Elk3	2342.11	1111.47	1726.79	1.07547	0.163424	6.58086	4.67728e-11	2.27637e-09
Elmod2	121.95	64.2	93.0759	0.927356	0.46259	2.00471	0.0449946	0.163591
Elovl7	0	14.04	7.01888	-6.17233	2.82299	-2.18645	0.0287825	0.118231
Emilin1	4582.28	2486.02	3534.15	0.882495	0.17013	5.18718	2.13503e-07	5.05712e-06
Emp1	8618.76	3150.87	5884.82	1.4517	0.154315	9.40736	5.08753e-21	7.75824e-19
Emp3	2792.9	1712.44	2252.67	0.706056	0.18775	3.76063	0.000169487	0.00188854
Enc1	2545	1491.05	2018.03	0.771508	0.170577	4.52294	6.09876e-06	0.000104331
Eng	10642.5	4387.54	7515.01	1.27809	0.195068	6.55205	5.67519e-11	2.75367e-09
Eno3	96.58	642.04	369.309	-2.73298	1.06156	-2.5745	0.0100386	0.0534366
Enpep	420.92	191.04	305.982	1.13697	0.400151	2.84136	0.00449211	0.0283738
Enpp1	2683.2	1341.12	2012.16	1.00089	0.219074	4.56876	4.90626e-06	8.61393e-05
Enpp3	1807.45	357.43	1082.44	2.33974	0.214226	10.9218	9.06442e-28	2.6389e-25
Entpd4	438.69	737.62	588.153	-0.749985	0.280184	-2.67676	0.00743372	0.042359
Epb41l3	238.22	115.55	176.887	1.04121	0.470783	2.21165	0.0269912	0.112694
Epb41l4a	89.26	207.23	148.245	-1.21632	0.497159	-2.44655	0.0144232	0.0703241
Epb41l4b	28.3	156.81	92.5549	-2.46989	0.578493	-4.26953	1.9589e-05	0.000287709
Epha2	363.18	187.42	275.302	0.951893	0.428157	2.22323	0.0262002	0.110052
Epha4	183.66	1249.34	716.497	-2.76612	0.985932	-2.80559	0.0050225	0.0311103
Epha8	0	21.11	10.553	-6.76002	2.53162	-2.67024	0.00757978	0.0429467
Ephb2	414.93	179.31	297.119	1.21064	0.279942	4.32462	1.52796e-05	0.000233141
Ephb6	300.16	615.92	458.042	-1.03536	0.263917	-3.92306	8.74322e-05	0.00106058
Epor	16.26	0	8.12986	6.56687	2.69911	2.43297	0.0149755	0.0724434
Eps8l2	176.6	33.24	104.92	2.40918	0.419179	5.74737	9.0642e-09	2.754e-07
Epsti1	291.61	68.31	179.962	2.09564	0.431911	4.85203	1.22206e-06	2.46443e-05
Erbb3	1111.89	196.46	654.178	2.49886	0.318681	7.84125	4.46072e-15	3.903e-13
Erbb4	956.52	519.89	738.208	0.878285	0.346723	2.5331	0.0113058	0.0588134
Ercc4	269.99	169.2	219.595	0.676842	0.325656	2.07839	0.0376731	0.143906
Ercc5	807.45	1239.87	1023.66	-0.618909	0.156984	-3.9425	8.06359e-05	0.000986938
Ercc6l	62.38	7.45	34.9133	3.08072	1.50083	2.05268	0.0401034	0.150807
Erf	1051.08	446.94	749.011	1.2335	0.176548	6.98676	2.81303e-12	1.66208e-10
Erg	1971.14	696.38	1333.76	1.5014	0.215756	6.95877	3.43264e-12	1.9771e-10
Eri1	515.38	334.03	424.707	0.624603	0.258832	2.41316	0.015815	0.075321
Erlin1	577.54	352.6	465.068	0.712197	0.224793	3.16824	0.00153366	0.0119674
Erp29	1616.11	738.04	1177.07	1.13109	0.138766	8.15109	3.60661e-16	3.67828e-14
Errfi1	6531.6	12850.3	9690.94	-0.97621	0.26106	-3.73941	0.000184455	0.00203129
Esco2	40.73	7.51	24.1202	2.4291	1.19889	2.02612	0.0427528	0.157692
Esm1	2173.35	69.24	1121.3	4.96414	0.385128	12.8896	5.15343e-38	3.30067e-35
Espl1	83.5	29.85	56.6748	1.48182	0.571998	2.5906	0.00958086	0.0516702
Esr1	115.97	462	288.982	-1.99267	0.417222	-4.77604	1.78779e-06	3.47404e-05
Esrrb	1.02	40	20.511	-5.28101	2.08784	-2.52941	0.0114255	0.0592173
Esrrg	140.69	551.74	346.216	-1.97018	0.373212	-5.279	1.29893e-07	3.19484e-06
Etfa	1297.44	2690.18	1993.81	-1.05217	0.310121	-3.39278	0.00069187	0.00621325
Etfb	798.59	1900.4	1349.5	-1.25115	0.325599	-3.84261	0.000121733	0.00141348
Etfdh	847.08	1722.48	1284.78	-1.02409	0.296816	-3.45025	0.000560078	0.0052109
Ets2	1123.98	607.78	865.882	0.886643	0.156194	5.67654	1.37449e-08	4.05311e-07
Etv4	118.31	19.83	69.0699	2.58017	1.0664	2.41951	0.0155415	0.0744395
Etv5	601.83	201.63	401.73	1.57881	0.261891	6.02852	1.65473e-09	6.0492e-08
Eva1a	121.75	53.78	87.7647	1.18451	0.510716	2.3193	0.0203786	0.0913243
Eva1c	151.57	313.59	232.58	-1.04911	0.266131	-3.94208	8.07771e-05	0.000987331
Exnef	253.95	122.3	188.127	1.05317	0.297979	3.53437	0.000408751	0.00397626
Exo1	20.3	0	10.151	6.88814	2.54287	2.70881	0.00675251	0.0394201
Exo5	140.53	74.22	107.376	0.925148	0.443855	2.08435	0.0371286	0.14243
Exoc3l2	348.44	41.85	195.149	3.05163	0.428338	7.12435	1.04571e-12	6.54059e-11
Ext1	2259.04	1372.94	1815.99	0.718993	0.13166	5.46096	4.7356e-08	1.25126e-06
Eya4	118.42	274	196.208	-1.211	0.48521	-2.49582	0.0125666	0.0633155
Ezh2	404.98	257.89	331.437	0.649926	0.228983	2.83831	0.00453534	0.0285905
Ezr	1210.11	1917.59	1563.85	-0.664585	0.179321	-3.70611	0.000210467	0.00226344
F13a1	2983.51	1859.56	2421.54	0.682232	0.186293	3.66215	0.000250105	0.00259876
F2r	3628.65	798.55	2213.6	2.18497	0.199154	10.9712	5.25415e-28	1.58735e-25
F2rl1	179.62	54.97	117.291	1.70465	0.510465	3.33942	0.000839549	0.00729401
F2rl2	59.65	163.56	111.604	-1.45287	0.484205	-3.00052	0.00269516	0.0188039
F3	1291.76	2406.51	1849.13	-0.897199	0.249421	-3.59713	0.000321748	0.00322999
F5	200.61	758.32	479.464	-1.91846	0.309969	-6.18922	6.04643e-10	2.42039e-08
Fabp5	441.58	163.97	302.779	1.42599	0.420333	3.39253	0.000692505	0.00621547
Fads1	795.4	1334.45	1064.93	-0.745973	0.167579	-4.45148	8.52789e-06	0.000140194
Fads2	754.9	2305.81	1530.36	-1.61046	0.199597	-8.06854	7.11426e-16	6.98856e-14
Fads6	6.09	71.48	38.7864	-3.53836	1.00991	-3.50362	0.000458971	0.00438226
Fahd2a	182.44	344.66	263.549	-0.918832	0.322014	-2.85339	0.0043255	0.0275514
Fam102b	1114.51	673.16	893.837	0.726382	0.183055	3.9681	7.24492e-05	0.00090056
Fam105a	271.69	85.65	178.667	1.66775	0.385153	4.33008	1.49052e-05	0.000227949
Fam107a	122.58	703.8	413.189	-2.51993	0.351602	-7.16699	7.66626e-13	4.87112e-11
Fam107b	619.75	393.07	506.411	0.657241	0.196796	3.3397	0.000838681	0.00729043
Fam110a	113.75	29.48	71.6184	1.94535	0.510351	3.81178	0.000137969	0.00157038
Fam110c	20.62	0	10.3116	6.91033	1.88119	3.67339	0.000239353	0.00251478
FAM120C	267.49	715.93	491.709	-1.42013	0.223126	-6.36471	1.95661e-10	8.58288e-09
Fam126a	545.07	823.62	684.345	-0.595786	0.236134	-2.52308	0.0116332	0.0599711
Fam127c	168.49	258.78	213.634	-0.618099	0.291945	-2.11717	0.034245	0.134362
Fam129a	7641.48	30948.8	19295.1	-2.01792	0.198524	-10.1646	2.85285e-24	6.34442e-22
Fam132a	19.96	261.99	140.979	-3.70716	0.819287	-4.52486	6.04352e-06	0.000103718
Fam13a	1486.47	2653.73	2070.1	-0.835914	0.335345	-2.4927	0.0126776	0.0636542
Fam13c	651.2	1592.04	1121.62	-1.28908	0.279326	-4.61496	3.93168e-06	7.10542e-05
Fam150b	0	11.53	5.76621	-5.88602	2.96225	-1.98701	0.0469209	0.168869
Fam151a	116.23	191.03	153.629	-0.714937	0.349196	-2.04738	0.0406206	0.152251
Fam162a	1030.7	1545.83	1288.27	-0.585354	0.244221	-2.39681	0.0165383	0.0781153
Fam163b	0	28.53	14.2663	-7.19355	1.70578	-4.21717	2.47389e-05	0.000349619
Fam167b	322.02	34.67	178.347	3.21844	0.41827	7.69464	1.41894e-14	1.16513e-12
Fam168a	1751.29	2889.16	2320.23	-0.722438	0.150305	-4.80647	1.53617e-06	3.04043e-05
Fam171a2	389.4	240.57	314.987	0.69481	0.33562	2.07023	0.0384308	0.146061
Fam171b	265.7	534.36	400.029	-1.00804	0.228771	-4.40634	1.05131e-05	0.000168
Fam173b	88.79	144.15	116.47	-0.69982	0.350383	-1.9973	0.0457928	0.165815
Fam174b	75.31	379.81	227.557	-2.33406	0.696593	-3.35068	0.000806144	0.00705482
Fam178b	28.94	78.24	53.5908	-1.43439	0.71611	-2.00303	0.0451741	0.164094
Fam180a	476.94	92.24	284.59	2.36547	0.388685	6.08583	1.15891e-09	4.3255e-08
Fam185a	177.37	291.7	234.538	-0.716912	0.264856	-2.7068	0.00679357	0.0395792
Fam188a	625.8	413.78	519.788	0.595763	0.286761	2.07756	0.0377497	0.144019
Fam189a2	113.33	352.12	232.724	-1.63546	0.49566	-3.29955	0.000968389	0.00818251
Fam196b	128.23	41.13	84.6831	1.64422	0.616581	2.66667	0.0076606	0.0431919
Fam198a	206.29	374.07	290.176	-0.857693	0.409143	-2.09632	0.036054	0.139511
Fam198b	11333.9	4398.47	7866.2	1.36567	0.20969	6.51282	7.37531e-11	3.44296e-09
Fam19a5	20.12	63.19	41.6506	-1.64941	0.630442	-2.61627	0.00888962	0.0486468
Fam20a	147.53	256.59	202.056	-0.798154	0.347643	-2.2959	0.0216817	0.0952446
Fam20c	2045.65	1340.51	1693.08	0.609811	0.15187	4.01536	5.93559e-05	0.000753693
Fam210b	491.57	1412.5	952.035	-1.52339	0.218411	-6.97488	3.06124e-12	1.7946e-10
Fam212b	403.87	1157.82	780.844	-1.51875	0.247617	-6.13348	8.59776e-10	3.34144e-08
Fam46a	1812.41	1194.72	1503.56	0.600567	0.213301	2.81559	0.00486883	0.0303227
Fam49a	397.38	702.07	549.725	-0.8213	0.255616	-3.21302	0.00131347	0.0105791
Fam49b	705.66	428.19	566.925	0.719632	0.244682	2.94109	0.00327055	0.0219757
Fam57a	225.98	114.69	170.333	0.976296	0.367741	2.65485	0.00793441	0.0444682
Fam57b	39.11	139.32	89.217	-1.82949	0.673102	-2.718	0.0065677	0.0385491
Fam63b	594.39	1162.75	878.567	-0.968511	0.33937	-2.85385	0.00431929	0.0275441
Fam64a	97.43	14.7	56.0666	2.73384	0.611566	4.47023	7.81343e-06	0.000129781
Fam78b	83.91	242.64	163.273	-1.53212	0.543876	-2.81705	0.00484669	0.0301966
Fam83b	4.04	35.67	19.8555	-3.13381	1.53136	-2.04643	0.0407145	0.15246
Fam83c	11.82	0	5.91174	6.10841	2.90338	2.1039	0.0353876	0.137678
Fam83d	53.71	11.58	32.6436	2.20431	1.10506	1.99474	0.0460716	0.166448
Fanci	189.57	55.59	122.583	1.76724	0.429745	4.1123	3.91734e-05	0.000522704
Fank1	21.43	0	10.7138	6.96447	1.85774	3.74889	0.000177617	0.00196938
Fap	695.37	196.68	446.025	1.82031	0.416376	4.37178	1.23237e-05	0.000193095
Farp1	1467.19	641.26	1054.23	1.19395	0.179601	6.64778	2.9754e-11	1.50291e-09
Fasn	5434.8	14046.7	9740.77	-1.36994	0.541018	-2.53216	0.0113363	0.0588984
Fat1	31251.4	17273.6	24262.5	0.855409	0.133739	6.39612	1.59373e-10	7.1083e-09
Fblim1	5224.47	13492.9	9358.7	-1.36869	0.17338	-7.89413	2.92352e-15	2.58626e-13
Fbln1	4786.52	8648.65	6717.58	-0.853348	0.206087	-4.14072	3.46214e-05	0.000471392
Fbln2	18963	7779.32	13371.2	1.28555	0.228606	5.62345	1.87186e-08	5.36174e-07
Fbln7	1102.11	250.06	676.085	2.14118	0.296103	7.23119	4.78764e-13	3.15472e-11
Fbn1	88193.7	54362.8	71278.2	0.698074	0.159678	4.37176	1.23247e-05	0.000193095
Fbn2	124.32	25.01	74.6612	2.31116	1.12918	2.04675	0.0406823	0.152411
Fbxl22	461.74	981.74	721.737	-1.08893	0.248017	-4.39055	1.13062e-05	0.000178888
Fbxo10	345.88	573.17	459.525	-0.727087	0.307428	-2.36507	0.0180268	0.0836556
Fbxo32	869.47	1471.23	1170.35	-0.758595	0.251103	-3.02105	0.00251904	0.0178296
Fbxo40	81.31	483.69	282.5	-2.57346	0.673238	-3.82252	0.000132097	0.0015147
Fbxo41	22.63	0	11.3126	7.04446	2.47701	2.84394	0.00445601	0.0282014
Fcer1g	1205.84	359.14	782.489	1.74824	0.228175	7.66182	1.83319e-14	1.47503e-12
Fcer2	12.49	0	6.24656	6.18788	2.86322	2.16116	0.0306828	0.124033
Fcgr1a	363.14	91.28	227.208	1.99636	0.511034	3.9065	9.36415e-05	0.00112651
Fcgr2b	243.99	51.69	147.84	2.23433	0.4539	4.92252	8.54348e-07	1.77317e-05
Fcgr3a	84.3	0	42.1498	8.94028	1.41735	6.30773	2.83154e-10	1.18999e-08
Fcgrt	2371.32	1447.2	1909.26	0.71262	0.183894	3.87517	0.000106551	0.00126674
Fcho1	37.36	0	18.6816	7.76727	1.68615	4.60652	4.09465e-06	7.37497e-05
Fcna	718.24	199.5	458.869	1.84861	0.266896	6.92631	4.31954e-12	2.45264e-10
Fcnb	89.08	6.61	47.8429	3.754	1.35631	2.76781	0.00564347	0.0340993
Fcrl2	408.75	47.86	228.303	3.09935	0.601189	5.15537	2.53136e-07	5.9171e-06
Fcrla	16.6	0	8.3009	6.59787	2.69795	2.44552	0.0144645	0.0704394
Fech	443.99	689.08	566.535	-0.635022	0.228495	-2.77915	0.00545021	0.0330817
Fem1a	631.94	1084.84	858.392	-0.780107	0.295307	-2.64168	0.00824957	0.0459611
Fermt3	621.92	193.8	407.858	1.68057	0.246057	6.83	8.49157e-12	4.68852e-10
Fes	698.78	200.19	449.487	1.80384	0.310947	5.80111	6.58786e-09	2.05223e-07
Ffar2	8.61	0.27	4.44194	4.69016	2.3197	2.02188	0.0431883	0.158863
Fgd2	369.36	70.93	220.148	2.38064	0.429742	5.53969	3.03011e-08	8.3079e-07
Fgd3	367.19	100.15	233.666	1.87475	0.336313	5.57442	2.48352e-08	6.96429e-07
Fgf12	208.62	778.11	493.364	-1.89861	0.236107	-8.04128	8.89047e-16	8.68014e-14
Fgf14	79.21	162.33	120.768	-1.03583	0.352602	-2.93769	0.00330667	0.0221626
Fgf23	12.17	0	6.0859	6.14875	2.89324	2.12521	0.0335689	0.132682
Fgf7	306.43	64.52	185.472	2.2493	0.367492	6.12069	9.31737e-10	3.56061e-08
Fgfr1op	334.41	218.28	276.346	0.613242	0.302597	2.02659	0.0427041	0.157589
Fgr	214.97	37.68	126.328	2.51787	0.430923	5.84297	5.1277e-09	1.64539e-07
Fh	1000.2	1876.24	1438.22	-0.907715	0.323361	-2.80712	0.00499859	0.0309862
Fhl3	359.65	216.74	288.197	0.729416	0.257218	2.83579	0.0045712	0.02876
Fhod1	856.43	485.83	671.126	0.817917	0.226585	3.60976	0.000306483	0.00310203
Fhod3	895.67	4755.36	2825.51	-2.40824	0.290204	-8.29844	1.05486e-16	1.09678e-14
Fibin	2201.34	1363.8	1782.57	0.691003	0.18391	3.75728	0.000171771	0.00191266
Figf	961.24	189.6	575.42	2.34397	0.358548	6.53738	6.26056e-11	2.98834e-09
Filip1	1215.99	3898.95	2557.47	-1.68092	0.277198	-6.06398	1.32795e-09	4.93346e-08
Fitm2	341.64	847.07	594.354	-1.31038	0.409529	-3.19971	0.00137565	0.0109696
Fjx1	468.33	162.09	315.21	1.53138	0.362783	4.2212	2.43006e-05	0.000344642
Fkbp10	3521.14	1612.26	2566.7	1.12706	0.157449	7.15827	8.17003e-13	5.15033e-11
Fkbp11	584.17	310.33	447.251	0.912574	0.327311	2.78809	0.00530198	0.0324275
Fkbp4	1045.6	2458.82	1752.21	-1.23402	0.25299	-4.87772	1.07319e-06	2.19464e-05
Fkbp5	1570.1	3626.9	2598.5	-1.20799	0.341114	-3.54131	0.000398141	0.00388484
Fli1	852.28	557.32	704.801	0.61204	0.208161	2.94022	0.00327981	0.0220194
Flna	107606	166693	137150	-0.631428	0.243448	-2.59369	0.00949527	0.0512777
Flnb	3194.77	2008.11	2601.44	0.669959	0.129218	5.18474	2.16318e-07	5.10115e-06
Flnc	4684.94	7635.21	6160.08	-0.704585	0.265076	-2.65805	0.00785939	0.0441379
Flrt1	208.5	341.26	274.877	-0.710297	0.293792	-2.41769	0.0156196	0.0747037
Flrt2	2127.67	729.4	1428.53	1.54386	0.163615	9.43597	3.87393e-21	6.20293e-19
Flt4	505.04	263.81	384.424	0.936925	0.283477	3.30512	0.000949368	0.00805152
Flvcr2	436.28	209.09	322.681	1.06176	0.323106	3.2861	0.00101584	0.00851155
Fmn1	285.66	71.75	178.706	1.99367	0.32471	6.13985	8.26016e-10	3.22589e-08
Fmnl3	2917.98	1317.84	2117.91	1.14701	0.135626	8.45719	2.73906e-17	2.96337e-15
Fmo1	477.12	973.21	725.169	-1.02793	0.341345	-3.0114	0.00260049	0.018319
Fmo2	928.92	2977.4	1953.16	-1.67991	0.283151	-5.93291	2.97618e-09	1.01609e-07
Fmo3	983.97	2582.82	1783.39	-1.39189	0.225525	-6.1718	6.7516e-10	2.6759e-08
Fmo6	2.69	47.21	24.9528	-4.11501	1.35867	-3.02871	0.00245598	0.0174391
Fmod	6282.53	3999.05	5140.79	0.651875	0.254035	2.56608	0.0102854	0.0544789
Fn1	460642	59588.4	260115	2.95056	0.196622	15.0062	6.68221e-51	7.13304e-48
Fndc1	25185.8	5259.77	15222.8	2.25954	0.456786	4.94661	7.55172e-07	1.59523e-05
Fndc5	134.59	601.97	368.28	-2.16365	0.292579	-7.3951	1.41306e-13	9.97251e-12
Fndc8	0	14.87	7.43666	-6.25751	2.26272	-2.76548	0.00568388	0.0342918
Fndc9	12.65	0	6.32318	6.20578	2.27121	2.73237	0.00628809	0.0372218
Fntb	201.78	340.25	271.014	-0.75488	0.307414	-2.45558	0.0140657	0.068938
Folr2	436.28	89.16	262.718	2.29543	0.433835	5.29101	1.2164e-07	3.01969e-06
Fos	898.36	3791.24	2344.8	-2.07722	0.773584	-2.68519	0.0072488	0.0416103
Foxc1	1021.31	1902.27	1461.79	-0.896584	0.20937	-4.2823	1.84975e-05	0.000274496
Foxm1	283.21	105.57	194.389	1.42634	0.346583	4.11544	3.86438e-05	0.000516929
Foxo1	1436.06	2776.31	2106.18	-0.951295	0.148281	-6.41547	1.40389e-10	6.29665e-09
Foxo6	3.73	85.05	44.394	-4.49599	1.24716	-3.60498	0.00031218	0.00314973
Foxred1	423.92	807.21	615.569	-0.929284	0.265069	-3.50581	0.000455216	0.00435419
Fpgs	511.89	291.98	401.934	0.811776	0.25859	3.13924	0.00169388	0.0129834
Fpgt	141.49	249.3	195.396	-0.816154	0.387081	-2.10848	0.0349891	0.136607
Frem1	964.71	204.86	584.782	2.23468	0.417057	5.35822	8.40481e-08	2.16016e-06
Frem2	28.87	382.22	205.545	-3.72951	0.59953	-6.22072	4.94881e-10	2.01118e-08
Frmd4b	2016.47	1039.52	1528	0.955395	0.16965	5.63156	1.78591e-08	5.16173e-07
Frrs1	624.94	399.06	512.004	0.646583	0.238701	2.70876	0.00675354	0.0394201
Frrs1l	11.08	94.93	53.0039	-3.09198	0.722487	-4.27963	1.87203e-05	0.000276521
Fscn1	1513.91	424.58	969.245	1.83509	0.19506	9.40783	5.06476e-21	7.75824e-19
Fsd1l	279.75	679.16	479.455	-1.28054	0.510497	-2.50842	0.0121271	0.0618561
Fst	894.07	251.31	572.688	1.82832	0.300496	6.08434	1.16972e-09	4.35571e-08
Ftl1	5080.2	2449.37	3764.79	1.05282	0.224779	4.68377	2.81639e-06	5.25751e-05
Fuca1	1481.25	754.95	1118.1	0.972166	0.141293	6.88049	5.96491e-12	3.35123e-10
Fundc1	285.64	470.77	378.207	-0.722147	0.33741	-2.14027	0.0323332	0.129139
Fut2	13.69	44.37	29.0307	-1.69003	0.834049	-2.0263	0.0427344	0.157664
Fut4	239.36	136.95	188.152	0.805565	0.319723	2.51957	0.0117498	0.0604752
Fxn	176.95	369.06	273.001	-1.06202	0.507521	-2.09256	0.0363882	0.140499
Fxr1	532.9	918.4	725.646	-0.78611	0.271367	-2.89686	0.00376921	0.0246538
Fxyd1	1407.92	2820.21	2114.07	-1.00253	0.215602	-4.6499	3.3209e-06	6.09797e-05
Fxyd2	708.77	319.87	514.32	1.14821	0.216493	5.30369	1.13486e-07	2.83929e-06
Fxyd5	4688.08	1137.73	2912.9	2.04272	0.149658	13.6493	2.03802e-42	1.71751e-39
Fyb	1094.29	404.61	749.452	1.43591	0.319239	4.49792	6.86207e-06	0.00011578
Fyco1	2081.01	4222.44	3151.73	-1.02098	0.218207	-4.67896	2.88335e-06	5.37464e-05
G0s2	531.28	897.26	714.274	-0.756503	0.369478	-2.04749	0.0406098	0.152246
G2e3	228.92	128.76	178.842	0.828382	0.407801	2.03134	0.0422209	0.156455
G6b	2.04	34.72	18.3764	-4.07714	1.51529	-2.69066	0.00713113	0.0411176
G6pd	2174.44	1364.75	1769.59	0.672132	0.144811	4.64144	3.45994e-06	6.29552e-05
Gabarapl2	664.96	997.48	831.217	-0.585038	0.241337	-2.42416	0.0153439	0.0738021
Gabra2	21.13	0	10.5647	6.94491	1.99365	3.48351	0.000494889	0.00466868
Gabrb1	16.36	0	8.17767	6.57517	2.68353	2.45019	0.014278	0.0697434
Gabre	50.09	412.85	231.473	-3.04065	0.521885	-5.82628	5.6675e-09	1.79699e-07
Gadd45b	477.95	84.47	281.207	2.49459	0.409777	6.08767	1.14567e-09	4.28611e-08
Gal	0	1004.97	502.486	-12.3322	1.23807	-9.96089	2.26041e-23	4.76233e-21
Galc	212.46	85.9	149.177	1.30536	0.321682	4.05793	4.951e-05	0.000642427
Gale	261.84	89.33	175.585	1.5532	0.320592	4.84479	1.26747e-06	2.5464e-05
Galk1	347.18	184.42	265.8	0.911485	0.310897	2.93179	0.00337018	0.0224847
Galk2	453.32	281.3	367.31	0.68695	0.269613	2.54792	0.0108369	0.0567986
Galns	817.86	348.32	583.087	1.23093	0.268819	4.57902	4.67171e-06	8.2896e-05
Galnt1	2544.76	1432.34	1988.55	0.829013	0.177623	4.66727	3.05231e-06	5.65012e-05
Galnt10	553.82	154.05	353.932	1.84444	0.384661	4.79498	1.62687e-06	3.19234e-05
Galnt16	1577.6	2440.42	2009.01	-0.628906	0.212996	-2.95266	0.00315045	0.0213479
Galnt18	796.67	491.07	643.868	0.696762	0.321143	2.16963	0.030035	0.121965
Galnt6	21.99	0	10.9938	7.0028	1.87473	3.73537	0.000187442	0.00205852
Ganc	346.07	551.24	448.658	-0.671746	0.222902	-3.01364	0.0025813	0.0182159
Garnl3	67.8	125.48	96.6401	-0.886663	0.42511	-2.08573	0.0370034	0.142154
Gars	2515.06	1566.16	2040.61	0.682959	0.162142	4.2121	2.53011e-05	0.000356935
Gas2l1	1836.41	1213.45	1524.93	0.59858	0.15516	3.85783	0.000114397	0.00134389
Gas2l3	145.87	55.03	100.451	1.40994	0.615382	2.29116	0.0219541	0.0961512
Gas7	8387.56	3564.94	5976.25	1.23452	0.142335	8.67329	4.19804e-18	5.09235e-16
Gata2	408.94	670.67	539.801	-0.713637	0.22553	-3.16427	0.00155472	0.0120787
Gata5	0	105.65	52.8265	-9.0841	1.61476	-5.62565	1.84814e-08	5.31282e-07
Gba	1075.87	612.43	844.147	0.813638	0.188385	4.31902	1.56723e-05	0.000238541
Gbas	658.45	1233.56	946.004	-0.906003	0.385384	-2.35091	0.0187274	0.0861393
Gbe1	270.43	684.45	477.437	-1.33973	0.312203	-4.2912	1.77712e-05	0.00026544
Gcdh	492.65	828.59	660.623	-0.750069	0.172019	-4.36039	1.2983e-05	0.000202222
Gcnt1	353.43	150.89	252.157	1.22587	0.369987	3.31329	0.000922052	0.00785731
Gcnt2	290.14	122.38	206.262	1.24425	0.389979	3.19054	0.00142006	0.0112676
Gcnt6	277.35	137.25	207.302	1.01558	0.449773	2.25798	0.0239468	0.102853
Gcsh	304.6	461.07	382.839	-0.598286	0.247478	-2.41753	0.015626	0.0747101
Gda	5894.75	3231.81	4563.28	0.866978	0.150114	5.77545	7.67479e-09	2.3678e-07
Gdf10	606.07	348.29	477.182	0.80016	0.26512	3.0181	0.00254362	0.0179737
Gdf6	421.77	30.16	225.966	3.81266	0.38956	9.78708	1.27932e-22	2.38192e-20
Gdf7	56.64	152.48	104.563	-1.42595	0.594891	-2.397	0.0165299	0.0780989
Gfap	57.07	184.04	120.555	-1.69118	0.601178	-2.81311	0.00490643	0.0305094
Gfod1	2114.87	1029.15	1572.01	1.0391	0.225655	4.60481	4.12847e-06	7.42753e-05
Gfpt2	2670.71	1382.03	2026.37	0.950874	0.296819	3.20355	0.00135747	0.0108733
Gfra1	1513.87	3041.24	2277.56	-1.00602	0.244114	-4.12112	3.77039e-05	0.000506472
Gfra2	591.42	322.43	456.923	0.874688	0.287223	3.04533	0.00232424	0.0167262
Gga2	582.83	274.98	428.907	1.08521	0.245785	4.41529	1.00873e-05	0.000161842
Ggh	51.85	148.45	100.148	-1.5205	0.609001	-2.49671	0.0125353	0.0632278
Ghitm	1946.19	3371.42	2658.81	-0.792939	0.271671	-2.91875	0.00351443	0.0233015
Gimap1	155.56	63.48	109.521	1.28953	0.5466	2.35918	0.0183156	0.084662
Gimap4	451.86	212.73	332.296	1.08603	0.248709	4.36669	1.26143e-05	0.000196862
Gins1	27.78	2.2	14.9919	3.65903	1.6665	2.19564	0.0281175	0.115946
Gins2	84.72	18.43	51.5724	2.20694	1.11168	1.98522	0.0471202	0.169434
Giot1	156.02	252.24	204.128	-0.691634	0.322028	-2.14775	0.0317339	0.127158
Gipc3	353.9	828.04	590.968	-1.22576	0.317992	-3.8547	0.000115869	0.0013572
Gja1	4997.39	2663.95	3830.67	0.907343	0.249605	3.63512	0.000277849	0.00285183
Gja5	635.31	1134.18	884.742	-0.836043	0.306312	-2.72938	0.00634529	0.0374322
Gjb3	0	13.66	6.83027	-6.13017	2.8284	-2.16736	0.0302071	0.12245
Gkap1	437.34	854.66	646.002	-0.966054	0.210246	-4.59487	4.33029e-06	7.73845e-05
Glb1	1213.76	498.3	856.028	1.28564	0.288998	4.44863	8.64178e-06	0.00014134
Gli1	553.6	280.29	416.946	0.983929	0.286211	3.43777	0.000586516	0.0053911
Glis1	82.21	8.18	45.1955	3.32971	1.42926	2.32967	0.0198234	0.0897246
Glis3	209.99	60.91	135.447	1.78947	0.359483	4.97789	6.42805e-07	1.38714e-05
Glmp	507.98	295.3	401.637	0.784422	0.314599	2.4934	0.0126526	0.0636048
Glp1r	0	77.02	38.5084	-8.62644	1.44155	-5.98414	2.17538e-09	7.75771e-08
Gm2a	2774.71	1702.53	2238.62	0.705202	0.154077	4.57693	4.71843e-06	8.34823e-05
Gmfg	333.37	147.1	240.236	1.18253	0.322045	3.67193	0.000240721	0.00252098
Gmip	446.33	188.47	317.398	1.24245	0.30408	4.08594	4.38986e-05	0.000579476
Gmppb	514.5	340.63	427.568	0.59568	0.285667	2.08523	0.0370486	0.14226
Gna14	63.04	197.23	130.138	-1.64373	0.485229	-3.38753	0.00070525	0.00631383
Gna15	300.05	78.23	189.142	1.94258	0.37583	5.16879	2.35616e-07	5.52369e-06
Gnao1	522.79	1248.37	885.581	-1.25594	0.24851	-5.05389	4.3289e-07	9.6538e-06
Gnat2	62.51	181.9	122.209	-1.53883	0.428988	-3.5871	0.000334371	0.00333787
Gnb4	290.83	167.03	228.93	0.800895	0.344623	2.32397	0.0201269	0.0906131
Gnb5	156.51	313.12	234.816	-0.998968	0.3491	-2.86155	0.00421574	0.0270014
Gngt2	139.34	27.65	83.4917	2.33561	0.645449	3.61858	0.000296226	0.00300581
Gnpda1	312.44	199.98	256.211	0.643292	0.289673	2.22075	0.0263679	0.110582
Gp1ba	24.8	150.12	87.458	-2.60449	0.625483	-4.16396	3.12777e-05	0.000430256
Gpam	907.38	1513.1	1210.24	-0.737902	0.196743	-3.75059	0.000176417	0.00195893
Gpc3	2054.81	4669.56	3362.19	-1.18423	0.282429	-4.19304	2.75239e-05	0.000384231
Gpc6	2486.66	7334.67	4910.66	-1.5604	0.165957	-9.40245	5.33084e-21	8.05258e-19
Gpcpd1	286.66	735.33	510.994	-1.35942	0.323561	-4.20144	2.65223e-05	0.000372195
Gpd1	2937.13	7126.7	5031.92	-1.27888	0.324672	-3.93899	8.18265e-05	0.000998632
Gpd2	674.77	1562	1118.38	-1.2111	0.432835	-2.79806	0.00514108	0.0316611
Gpld1	146.37	301.01	223.689	-1.04046	0.459402	-2.26481	0.0235241	0.101309
Gpm6a	24.74	87.46	56.1005	-1.82111	0.596371	-3.05366	0.00226069	0.0163743
Gpn2	127.73	63.62	95.6721	1.00368	0.453134	2.21498	0.0267618	0.11197
Gpnmb	1300.81	235.81	768.312	2.46151	0.202718	12.1425	6.2874e-34	2.961e-31
Gpr146	483.85	892.36	688.101	-0.883449	0.336061	-2.62884	0.00856771	0.047273
Gpr155	78.08	171.07	124.576	-1.13242	0.536488	-2.1108	0.0347893	0.136032
Gpr160	119.06	39.63	79.347	1.59012	0.583776	2.72385	0.00645264	0.0379155
Gpr161	360.32	598.44	479.383	-0.732066	0.228889	-3.19835	0.00138218	0.0109997
Gpr17	215.32	510.46	362.891	-1.24481	0.482412	-2.5804	0.00986873	0.0526902
Gpr176	747.83	86.24	417.034	3.11071	0.389003	7.99663	1.27875e-15	1.21155e-13
Gpr183	223.06	90.65	156.857	1.2972	0.313976	4.13153	3.60351e-05	0.000487738
Gpr34	157.46	68.23	112.847	1.20972	0.543125	2.22733	0.0259253	0.109327
Gpr39	293.11	11.43	152.275	4.67116	1.51971	3.07371	0.00211418	0.0155428
Gpr88	679.06	201.89	440.476	1.75213	0.319744	5.4798	4.25803e-08	1.13822e-06
Gprasp1	474.89	1347.61	911.251	-1.5056	0.189075	-7.96294	1.68005e-15	1.5372e-13
Gprasp2	195.92	506.88	351.404	-1.37053	0.256647	-5.34015	9.28717e-08	2.3755e-06
Gprc5a	99.38	235.87	167.629	-1.24684	0.338622	-3.68211	0.000231308	0.00244792
Gprc5c	289.05	108.29	198.675	1.42017	0.450867	3.14987	0.00163343	0.0125864
Gprc5d	0	23.23	11.6168	-6.89873	2.49978	-2.75974	0.00578481	0.0347436
Gpt	132.98	355.83	244.406	-1.41831	0.454858	-3.11815	0.00181992	0.0137261
Gpx3	29644.7	12866	21255.3	1.20414	0.255305	4.71648	2.39962e-06	4.55245e-05
Gpx8	1237.21	780.35	1008.78	0.665741	0.255648	2.60413	0.00921086	0.0500796
Grb2	550.15	354.18	452.166	0.63625	0.201245	3.16157	0.00156923	0.0121737
Greb1l	448.38	1101.72	775.051	-1.29585	0.204006	-6.35198	2.12554e-10	9.14898e-09
Grem1	407.35	69.75	238.553	2.54084	0.617902	4.11204	3.9218e-05	0.000522863
Grem2	158.66	692.52	425.59	-2.12435	0.501174	-4.23874	2.24779e-05	0.000322217
Grhl2	0	14.18	7.08776	-6.1833	2.80607	-2.20355	0.0275564	0.114368
Grhl3	12.17	271.3	141.736	-4.48249	0.769866	-5.82242	5.79999e-09	1.83175e-07
Gria1	9.13	101.47	55.3023	-3.46383	0.979543	-3.53617	0.000405979	0.00395892
Gria2	85.63	15.82	50.7206	2.43525	0.765106	3.18289	0.00145815	0.0115071
Gria3	166.88	510.85	338.863	-1.61449	0.584488	-2.76223	0.00574079	0.034583
Grifin	48.05	218.78	133.413	-2.1879	0.600285	-3.64477	0.000267627	0.00275756
Grin2b	10.98	0	5.49178	6.00083	2.98688	2.00906	0.0445303	0.162271
Grin2d	490.88	262.48	376.682	0.90307	0.233572	3.86634	0.000110481	0.00130484
Grin3a	70.05	5.35	37.6988	3.71264	1.39058	2.66984	0.00758874	0.0429548
Grip2	716.94	1273.05	994.998	-0.828435	0.344524	-2.40458	0.0161911	0.076838
Grn	5737.03	3053.59	4395.31	0.90994	0.136974	6.64316	3.07034e-11	1.54598e-09
Gsap	491.8	163.52	327.658	1.5886	0.339939	4.6732	2.96548e-06	5.5085e-05
Gsdmd	648.3	370.46	509.379	0.806596	0.192321	4.194	2.74078e-05	0.000383278
Gsg1l	71.09	132.93	102.01	-0.905881	0.45022	-2.01208	0.0442111	0.161475
Gsn	23073.8	94149	58611.4	-2.02866	0.158576	-12.7929	1.79545e-37	1.10572e-34
Gsta4	12.83	74.32	43.572	-2.52961	1.08989	-2.32098	0.0202879	0.0910456
Gstk1	79.24	190.5	134.869	-1.26682	0.486621	-2.6033	0.00923302	0.0501564
Gstm1	502	965.34	733.67	-0.942746	0.190624	-4.94558	7.59181e-07	1.60158e-05
Gstm2	1689.3	4983.37	3336.34	-1.56043	0.167375	-9.32298	1.13119e-20	1.6466e-18
Gstm7	94.53	738.19	416.358	-2.96291	0.496775	-5.9643	2.45687e-09	8.64601e-08
Gstt1	59.16	160.28	109.719	-1.43459	0.414327	-3.46246	0.000535256	0.00500031
Gstt3	134.59	45.26	89.9266	1.57516	0.609701	2.5835	0.00978046	0.0523586
Gstz1	183.11	322.85	252.979	-0.817958	0.38826	-2.10673	0.0351413	0.13702
Gtf2a1l	0	31.72	15.862	-7.347	1.67497	-4.38634	1.15274e-05	0.000181765
Gtf2h5	184.21	301.73	242.972	-0.71266	0.306236	-2.32716	0.0199568	0.0900311
Gtpbp4	204.8	341.3	273.053	-0.738772	0.331745	-2.22692	0.0259523	0.109412
Gtpbp6	44.43	12.06	28.246	1.88333	0.873571	2.1559	0.0310913	0.125205
Gucy1a3	925.1	3263.13	2094.11	-1.81809	0.238834	-7.61233	2.69193e-14	2.07227e-12
Gucy1b3	1022.34	1806.78	1414.56	-0.821272	0.180995	-4.53753	5.6916e-06	9.83106e-05
Gulp1	354.35	608.96	481.658	-0.781538	0.258148	-3.02748	0.002466	0.0175024
Gusb	392.35	178.92	285.634	1.13195	0.304136	3.72185	0.000197772	0.00214984
Gxylt2	2944.76	1961.13	2452.95	0.586805	0.256872	2.28442	0.0223467	0.0973911
Gypc	541.33	867.14	704.234	-0.679914	0.162503	-4.184	2.8642e-05	0.0003975
Gzmk	18.65	0	9.32257	6.76364	2.60372	2.59768	0.00938563	0.0508571
H2afx	640.42	368.2	504.31	0.797566	0.213321	3.73881	0.000184892	0.00203471
Hadh	710.01	1673.21	1191.61	-1.23671	0.342317	-3.61276	0.000302959	0.00307024
Hadha	2743.11	5184.39	3963.75	-0.91844	0.22773	-4.03302	5.50655e-05	0.000707632
Hadhb	1681.36	3455.5	2568.43	-1.03942	0.305151	-3.40624	0.000658651	0.00594829
Hap1	0	45.08	22.5385	-7.85554	1.57115	-4.99987	5.73681e-07	1.25318e-05
Haus7	392.22	241.69	316.955	0.69713	0.261014	2.67085	0.00756594	0.0429138
Hba1	1131.25	2467.63	1799.44	-1.12562	0.3871	-2.90784	0.00363933	0.0239459
Hba2	719.79	1814.91	1267.35	-1.33472	0.431632	-3.09226	0.00198638	0.0147728
Hbegf	639.45	357.65	498.55	0.837994	0.339102	2.47121	0.0134655	0.0668126
Hcfc1r1	732.88	1107.69	920.28	-0.596871	0.195826	-3.04796	0.002304	0.0166029
Hck	222.27	51.72	136.996	2.09898	0.663738	3.16237	0.00156491	0.0121461
Hcls1	431.42	105.83	268.629	2.03012	0.361333	5.61842	1.92706e-08	5.51002e-07
Hcn1	0	55.08	27.5386	-8.14301	3.90828	-2.08353	0.0372029	0.142613
Hdac11	31.73	97.37	64.553	-1.61649	0.688743	-2.34702	0.0189242	0.0868486
Hdac9	610.44	375.64	493.044	0.699072	0.243236	2.87405	0.00405243	0.0262172
Hddc3	172.21	351.05	261.628	-1.02891	0.428874	-2.3991	0.0164353	0.0777207
Hdhd3	19.52	55.24	37.3791	-1.4967	0.696173	-2.1499	0.0315634	0.126665
Heatr5a	1733.85	1119.71	1426.78	0.63054	0.145436	4.33551	1.45422e-05	0.000223679
Hebp1	757.74	450.16	603.951	0.750577	0.178449	4.20612	2.59789e-05	0.000365852
Hexb	1618.51	959.81	1289.16	0.7548	0.238268	3.16787	0.00153561	0.0119767
Heyl	1450.09	5074.49	3262.29	-1.80689	0.198078	-9.12212	7.36662e-20	1.03469e-17
Hibadh	485.3	972.21	728.756	-1.00349	0.275633	-3.64066	0.00027194	0.00279839
Hif3a	0	432.56	216.282	-11.117	1.24125	-8.95632	3.35687e-19	4.33469e-17
Higd2a	121.25	205.07	163.16	-0.760985	0.376529	-2.02105	0.0432744	0.15907
Hip1	10500.8	5845.24	8173.03	0.845206	0.144881	5.83379	5.41833e-09	1.72716e-07
Hist1h1a	228.57	35.08	131.824	2.69904	0.506603	5.32772	9.94538e-08	2.51971e-06
Hist1h1b	339.39	82.8	211.095	2.03237	0.392759	5.17459	2.2841e-07	5.36261e-06
Hist1h1d	2710.31	1739.74	2225.03	0.640088	0.15881	4.03052	5.56546e-05	0.000712343
Hist1h2ac	184.57	24.99	104.78	2.87598	0.611043	4.70668	2.51786e-06	4.75424e-05
Hist1h2ah	316.41	118.15	217.278	1.41816	0.352218	4.02637	5.6645e-05	0.000722448
Hist1h2ai	643.21	141.97	392.591	2.17604	0.284239	7.65568	1.92296e-14	1.53186e-12
Hist1h2ak	213.03	29.67	121.351	2.83827	0.556282	5.10221	3.35706e-07	7.69003e-06
Hist1h2an	390.5	147.5	268.999	1.40375	0.389136	3.60736	0.000309327	0.00312489
Hist1h2bcl1	168.49	64.17	116.33	1.38721	0.479165	2.89506	0.00379089	0.0247789
Hist1h2bd	100.34	24.51	62.4227	2.02491	0.614789	3.29367	0.000988901	0.00832069
Hist1h2bf	73.85	20.53	47.1864	1.8501	0.812318	2.27755	0.0227533	0.0987067
Hist1h2bk	284.36	55.33	169.844	2.35574	0.489576	4.81179	1.49582e-06	2.96792e-05
Hist1h2bl	29.58	2.56	16.0706	3.49699	1.24992	2.79777	0.0051456	0.0316614
Hist1h2bo	123.52	42.91	83.2134	1.52791	0.657181	2.32494	0.0200753	0.0904206
Hist1h3a	96.09	11.31	53.7029	3.07255	0.809701	3.79467	0.000147838	0.00167056
Hist2h4	632.71	412.23	522.473	0.618988	0.22127	2.79744	0.00515096	0.0316663
Hivep3	958.18	460.53	709.356	1.05587	0.178456	5.91668	3.28504e-09	1.10971e-07
Hjurp	151.95	23.33	87.6419	2.69591	1.00345	2.68663	0.00721759	0.0414668
Hk3	40.66	0	20.3313	7.88921	1.59263	4.95356	7.28668e-07	1.54536e-05
Hlf	164.78	404.16	284.466	-1.29301	0.299709	-4.3142	1.60183e-05	0.000243028
Hm13	2188.56	1285.78	1737.17	0.767104	0.154115	4.97747	6.44223e-07	1.38833e-05
Hmces	150.35	235.26	192.804	-0.646072	0.295945	-2.18308	0.0290299	0.118912
Hmgb2	1128.6	740.13	934.366	0.60807	0.164178	3.70373	0.000212453	0.00228155
Hmgb2l1	46.01	0	23.0051	8.06778	1.52172	5.30175	1.14696e-07	2.86507e-06
Hmgcs2	182.63	1198.49	690.561	-2.71287	0.460869	-5.88643	3.94615e-09	1.3028e-07
Hmmr	221.91	69.94	145.927	1.6631	0.493709	3.36858	0.000755574	0.00668781
Hmox1	529.79	157.64	343.716	1.75068	0.341085	5.13269	2.85628e-07	6.62823e-06
Hn1l	533.24	188.63	360.933	1.49993	0.27669	5.42096	5.92791e-08	1.54841e-06
Hnrnpab	1899.32	702.23	1300.77	1.43562	0.41619	3.44944	0.000561757	0.00522046
Hnrnpc	573.21	225.84	399.525	1.34527	0.58407	2.30326	0.021264	0.093977
Homer3	975.02	514.69	744.853	0.922869	0.201696	4.57554	4.75002e-06	8.39484e-05
Hopx	144.64	454.8	299.717	-1.65436	0.650814	-2.54198	0.0110226	0.0576023
Hoxb6	81.26	15.7	48.4798	2.36182	1.08368	2.17943	0.0292995	0.11971
Hoxb7	49.6	0	24.7993	8.17688	1.57709	5.18478	2.16265e-07	5.10115e-06
Hp	84.88	32.09	58.4851	1.4064	0.568224	2.47508	0.0133207	0.0662602
Hpx	24.77	0.94	12.8572	4.72096	1.5802	2.98758	0.00281199	0.0194663
Hr	763.34	1374.86	1069.1	-0.848481	0.211034	-4.02058	5.80545e-05	0.000739513
Hrc	1224.97	4582.39	2903.68	-1.90337	0.947388	-2.00907	0.0445299	0.162271
Hrct1	971.1	538.67	754.882	0.849917	0.272592	3.11791	0.00182139	0.0137307
Hs3st4	16.66	0	8.32792	6.60057	2.69178	2.45212	0.0142017	0.0694345
Hs6st1	1074.96	574.68	824.818	0.902446	0.169586	5.32145	1.02941e-07	2.59573e-06
Hs6st2	68.03	17.32	42.6763	1.97236	0.645758	3.05434	0.00225558	0.016357
Hsd11b1	1898.61	399.85	1149.23	2.24607	0.294493	7.62693	2.40414e-14	1.87781e-12
Hsd3b7	492.25	320.29	406.27	0.618321	0.2388	2.58928	0.00961762	0.0517987
Hsdl2	921.57	2076.05	1498.81	-1.17184	0.287255	-4.07942	4.51481e-05	0.000593779
Hspa2	1193.68	1965.3	1579.49	-0.719009	0.227961	-3.15408	0.00161002	0.0124505
Hspb6	843.24	3079.43	1961.34	-1.86844	0.283397	-6.59302	4.30974e-11	2.12986e-09
Hspb9	10.57	0	5.28356	5.94363	2.37875	2.49864	0.0124671	0.0629229
Hspd1	2512.1	3890.19	3201.14	-0.631082	0.204519	-3.08569	0.00203082	0.0150265
Htr1b	173.48	43.17	108.324	2.00146	0.470951	4.24982	2.13945e-05	0.000310298
Htra2	315.56	199.29	257.426	0.661388	0.272246	2.42937	0.015125	0.0729902
Htra4	443.45	696.39	569.918	-0.652392	0.244246	-2.67104	0.00756162	0.0429046
Hvcn1	119.66	29.44	74.5459	2.021	0.599659	3.37024	0.000751021	0.00665855
Hyal1	891.26	1774.44	1332.85	-0.992946	0.180949	-5.48745	4.07788e-08	1.09189e-06
Ibsp	528.76	49.97	289.365	3.41141	0.448299	7.60969	2.74753e-14	2.09492e-12
Icam1	1521.15	529.66	1025.41	1.5226	0.205935	7.39361	1.42894e-13	1.00352e-11
Icam5	28.24	0	14.1217	7.36408	1.73328	4.24864	2.15073e-05	0.00031137
Ice2	250.84	394.64	322.741	-0.653181	0.246378	-2.65113	0.00802221	0.0448818
Id2	1114.72	1702.12	1408.42	-0.609945	0.167272	-3.64642	0.000265916	0.00274789
Id3	2356.1	1236.47	1796.29	0.930367	0.131329	7.08425	1.39796e-12	8.64251e-11
Id4	3874.02	9829.43	6851.72	-1.34311	0.231306	-5.80662	6.37452e-09	1.9926e-07
Idh2	2649.39	7652.34	5150.86	-1.53026	0.579864	-2.639	0.00831502	0.0462613
Idh3a	2027.52	4062.76	3045.14	-1.00286	0.273002	-3.67346	0.000239285	0.00251478
Idh3B	1080.77	2287.88	1684.33	-1.08239	0.254067	-4.26025	2.04197e-05	0.000298049
Idh3g	748.36	1435.43	1091.9	-0.939825	0.361951	-2.59656	0.00941638	0.050972
Ier5l	627.27	260.17	443.721	1.26767	0.281387	4.50507	6.63516e-06	0.000112426
Iffo1	1515.87	821.82	1168.84	0.883197	0.196303	4.49914	6.82278e-06	0.000115239
Ifi30	1508.23	666.28	1087.25	1.17967	0.178245	6.61825	3.6348e-11	1.80747e-09
Ifi47	320.95	196.17	258.562	0.7105	0.317433	2.23826	0.0252038	0.106961
Ifit2	1136.69	730.27	933.479	0.638034	0.252486	2.52701	0.0115039	0.0594962
Ifit3	323.32	114.92	219.121	1.48899	0.546278	2.72569	0.00641669	0.0377597
Ifitm1	477.43	107.38	292.403	2.14796	0.449308	4.7806	1.74773e-06	3.41277e-05
Ifitm2	1326.41	848.61	1087.51	0.644558	0.155031	4.15761	3.21593e-05	0.000441247
Ifngr2	376.3	192.03	284.169	0.969394	0.326536	2.96872	0.00299046	0.0204717
Ifnlr1	407.75	180.1	293.922	1.17976	0.344206	3.42748	0.000609216	0.0055817
Ift122	320.41	491.58	405.993	-0.616591	0.218422	-2.82294	0.0047586	0.0297171
Ift27	153.9	379.66	266.779	-1.30306	0.336782	-3.86914	0.000109219	0.0012935
Ift43	491.1	850.99	671.043	-0.793947	0.215859	-3.67808	0.000234992	0.00247546
Ift81	526.79	953.21	740.001	-0.856203	0.212132	-4.03619	5.4327e-05	0.000700389
Igf1	8275.45	4864.36	6569.9	0.766656	0.208062	3.68476	0.000228921	0.0024323
Igfbp4	22736.2	8744.06	15740.1	1.37873	0.18644	7.39503	1.41379e-13	9.97251e-12
Igfbp5	26118.9	10538.2	18328.5	1.30942	0.259622	5.04357	4.56916e-07	1.01191e-05
Igfbp6	6445.41	3424.89	4935.15	0.912162	0.262717	3.47203	0.000516535	0.0048367
Ighmbp2	218.93	353.67	286.301	-0.692091	0.275578	-2.51141	0.012025	0.0614763
Igsf10	2763.2	6380.54	4571.87	-1.2071	0.210316	-5.73949	9.49629e-09	2.86895e-07
Igsf6	286.54	74.04	180.288	1.95415	0.405161	4.82314	1.41316e-06	2.81086e-05
Igsf7	87.35	23.02	55.1846	1.91997	0.616114	3.11626	0.00183163	0.0137664
Igsf8	292.56	113.54	203.05	1.36579	0.422366	3.23366	0.00122215	0.00995881
Igsf9b	367.06	986.3	676.679	-1.42592	0.337734	-4.22202	2.42124e-05	0.000343696
Igtp	354.59	216.5	285.544	0.709621	0.295168	2.40413	0.0162112	0.0769107
Ikzf1	287.69	64.34	176.016	2.15645	0.459032	4.69781	2.62962e-06	4.94195e-05
Ikzf3	51.71	11.2	31.4577	2.20956	0.738307	2.99274	0.00276481	0.0192371
Ikzf4	23.04	68.76	45.8998	-1.57987	0.767656	-2.05804	0.039586	0.149458
Il10	27.21	0	13.6028	7.30945	1.79252	4.07776	4.54709e-05	0.000597276
Il10ra	509.5	132.75	321.127	1.94133	0.329204	5.89705	3.70059e-09	1.23189e-07
Il10rb	722.31	408.15	565.232	0.823013	0.205393	4.00702	6.14891e-05	0.000777083
Il11	16.8	0	8.40141	6.61308	2.70398	2.44569	0.0144577	0.0704394
Il11ra1	1774.37	2731.4	2252.89	-0.622452	0.177046	-3.51576	0.00043849	0.00421003
Il12a	3.85	64.01	33.9315	-4.07597	1.43112	-2.84809	0.00439822	0.0278908
Il17ra	1517.4	534.98	1026.19	1.50449	0.216461	6.95039	3.64273e-12	2.09059e-10
Il18	85.45	21.2	53.3245	2.00746	0.653946	3.06977	0.00214227	0.0156773
Il18rap	48.68	2.13	25.4032	4.57278	1.37154	3.33404	0.000855943	0.00741632
Il1r1	2461.98	983.3	1722.64	1.32324	0.274257	4.82482	1.40129e-06	2.79421e-05
Il1rl1	304.29	169.03	236.659	0.846131	0.339244	2.49417	0.0126253	0.0635296
Il1rn	93.75	6.03	49.8895	3.98066	1.36113	2.92453	0.00344982	0.0229682
Il21r	150.16	7.55	78.8547	4.31402	2.13795	2.01782	0.0436095	0.159972
Il23a	4.67	37.03	20.8509	-2.99409	1.14	-2.6264	0.00862938	0.0475332
Il31ra	51.87	147.11	99.4902	-1.50356	0.610601	-2.46243	0.0138001	0.0679688
Il34	172.58	77.16	124.871	1.16382	0.389536	2.98769	0.00281091	0.0194663
Il6	65.41	4.61	35.0113	3.85281	1.40334	2.74546	0.00604259	0.0360216
Il6r	934.19	430.9	682.545	1.11515	0.320165	3.48305	0.000495735	0.00467199
Ilvbl	358.8	236.01	297.408	0.603751	0.243362	2.48087	0.0131061	0.0653751
Immt	2062.11	3562.56	2812.33	-0.789115	0.262355	-3.00782	0.00263132	0.0185047
Incenp	800.31	271.99	536.149	1.55758	0.221348	7.0368	1.96706e-12	1.17965e-10
Inhba	3162.54	1841.1	2501.82	0.780997	0.180056	4.33752	1.441e-05	0.000221859
Inhbb	220.6	67.68	144.138	1.70083	0.386917	4.39585	1.1034e-05	0.000175274
Inpp5j	11.63	162.84	87.2353	-3.80442	1.23949	-3.06934	0.00214532	0.0156782
Insc	163.85	397.18	280.514	-1.27631	0.458644	-2.78279	0.00538936	0.0328491
Insig2	261.24	397.82	329.531	-0.607233	0.242661	-2.50239	0.0123358	0.0625659
Insl3	13.55	0	6.77308	6.30451	2.82362	2.23278	0.0255636	0.108001
Invs	204.14	317.9	261.02	-0.637579	0.275316	-2.31581	0.0205688	0.0918684
Ipo11	797.18	1430.16	1113.67	-0.842602	0.172363	-4.88853	1.01592e-06	2.08817e-05
Iqgap3	391.64	85.14	238.388	2.20635	0.349836	6.30679	2.8488e-10	1.19411e-08
Iqsec3	0	71.82	35.9077	-8.52542	1.41246	-6.03585	1.58132e-09	5.80736e-08
Irf5	570.33	201.06	385.696	1.50386	0.233829	6.43144	1.26397e-10	5.7159e-09
Irf7	525.59	260.91	393.249	1.00953	0.378496	2.66721	0.00764849	0.0431832
Irf8	758.95	332.76	545.856	1.18868	0.308735	3.85015	0.000118045	0.00137866
Irgc	43.41	9	26.2064	2.25488	0.870331	2.59083	0.00957435	0.0516525
Isca1	953.31	1630.83	1292.07	-0.775102	0.299751	-2.58582	0.00971474	0.0521463
Islr	484.8	1603.13	1043.96	-1.72461	0.213082	-8.09365	5.79023e-16	5.72304e-14
Islr2	43.25	489.02	266.13	-3.49304	0.455286	-7.67219	1.69088e-14	1.38135e-12
Ism1	138.11	48.5	93.3063	1.5137	0.506299	2.98974	0.00279215	0.0193457
Itga1	4043.56	2528.53	3286.04	0.677335	0.161191	4.20205	2.64503e-05	0.000371511
Itga11	1603.23	697.41	1150.32	1.2016	0.28354	4.23785	2.25673e-05	0.000323209
Itga2b	68.03	306.03	187.029	-2.16976	0.423187	-5.1272	2.94089e-07	6.8147e-06
Itga4	576.42	216.65	396.537	1.41029	0.264889	5.32408	1.01465e-07	2.56254e-06
Itga6	1481.46	956.48	1218.97	0.630762	0.264473	2.38498	0.0170802	0.0800139
Itgal	362.18	64.91	213.545	2.47931	0.472015	5.25262	1.4995e-07	3.66006e-06
Itgam	568.53	108.79	338.656	2.38265	0.249524	9.54876	1.31258e-21	2.2599e-19
Itgax	245.2	55.82	150.513	2.13179	0.483605	4.40812	1.04271e-05	0.000166791
Itgb1bp2	98.84	619.57	359.201	-2.64828	1.18382	-2.23706	0.0252823	0.107135
Itgb2	761.44	192.28	476.857	1.98635	0.219238	9.06028	1.30122e-19	1.79613e-17
Itgb3	620.23	1122.25	871.239	-0.854997	0.264042	-3.23811	0.00120324	0.00983974
Itgb5	8331.79	5295.28	6813.53	0.654144	0.125799	5.19991	1.99385e-07	4.74657e-06
Itgb8	353.46	981.57	667.514	-1.47368	0.201927	-7.29808	2.91905e-13	1.9805e-11
Itk	39.55	0	19.7759	7.85012	1.61027	4.87503	1.08789e-06	2.21903e-05
Itpk1	957.09	1870.21	1413.65	-0.965874	0.23644	-4.08506	4.40652e-05	0.000581196
Itpr1	7257.44	12102.2	9679.82	-0.737716	0.134649	-5.47882	4.28173e-08	1.14265e-06
Itpripl2	1138.47	416.02	777.246	1.45355	0.187789	7.74035	9.91414e-15	8.4439e-13
Ivd	614.32	1217.99	916.153	-0.987661	0.399184	-2.4742	0.0133534	0.0663816
Jag1	2506.06	3955.23	3230.64	-0.657996	0.177742	-3.70196	0.000213937	0.00229441
Jag2	495.3	172.33	333.815	1.51991	0.416184	3.65203	0.000260177	0.00269292
Jak2	1358.69	839.32	1099	0.694143	0.162117	4.28173	1.85445e-05	0.00027494
Jak3	296.14	88.15	192.145	1.74458	0.435278	4.00796	6.12458e-05	0.000775231
Jam2	809.81	1584.28	1197.05	-0.968561	0.264139	-3.66686	0.00024555	0.00255806
Jazf1	309.29	511.87	410.579	-0.726473	0.281096	-2.58443	0.00975388	0.0522688
Jph1	90.86	224.94	157.9	-1.30736	0.433411	-3.01645	0.00255754	0.0180562
Jph2	2551.96	4894.63	3723.3	-0.939523	0.215841	-4.35284	1.34385e-05	0.000208102
Jun	2951.33	5895.31	4423.32	-0.997959	0.223931	-4.45655	8.32875e-06	0.000137343
Junb	2741.57	1607.11	2174.34	0.770939	0.205509	3.75137	0.000175874	0.00195427
Kank1	15654.1	31291	23472.6	-0.999175	0.160931	-6.20871	5.3422e-10	2.15464e-08
Kazald1	846.71	364.01	605.357	1.21671	0.24671	4.93175	8.14957e-07	1.70576e-05
Kbtbd3	152.44	259.26	205.853	-0.766085	0.317018	-2.41654	0.015669	0.0748929
Kbtbd7	37.16	129.6	83.3838	-1.80153	0.549851	-3.27639	0.00105142	0.00875475
Kcna2	174.2	778.51	476.355	-2.15918	0.368716	-5.85594	4.7431e-09	1.53427e-07
Kcna5	264.22	875.23	569.725	-1.72843	0.508682	-3.39786	0.000679151	0.00611274
Kcna6	58.96	13.36	36.1613	2.13227	0.794105	2.68512	0.00725036	0.0416103
Kcnab1	136.66	265.46	201.056	-0.956445	0.378207	-2.52889	0.0114423	0.0592734
Kcnab2	186.97	63.24	125.104	1.56598	0.397687	3.93773	8.22568e-05	0.00100312
Kcnb1	394.82	1030.78	712.8	-1.38387	0.211848	-6.5324	6.47236e-11	3.05709e-09
Kcnd2	0	38.79	19.3947	-7.63913	1.76648	-4.32449	1.52884e-05	0.000233141
Kcnd3	108.68	307.67	208.175	-1.4994	0.435817	-3.44043	0.000580785	0.00534456
Kcne3	36.06	100.26	68.1601	-1.47196	0.582708	-2.52607	0.0115347	0.0596292
Kcne4	722.16	357.71	539.935	1.01532	0.365337	2.77914	0.00545026	0.0330817
Kcng1	48.13	3.23	25.6792	3.86152	1.41491	2.72917	0.00634936	0.0374322
Kcnh2	1069.36	2775.92	1922.64	-1.37594	0.20402	-6.74415	1.53929e-11	8.16128e-10
Kcnip3	66.61	151.66	109.135	-1.1865	0.508773	-2.33208	0.0196963	0.0893312
Kcnj11	13.19	125.17	69.1817	-3.24314	1.26393	-2.56592	0.0102903	0.0544867
Kcnj15	320.49	42.59	181.539	2.91005	0.688704	4.22541	2.38509e-05	0.000338865
Kcnj16	31.52	0.54	16.0298	5.75675	1.66165	3.46449	0.000531243	0.00496571
Kcnj6	0	16.19	8.09403	-6.37832	2.07372	-3.07579	0.00209945	0.0154487
Kcnk13	106.83	42.03	74.431	1.34258	0.498375	2.69392	0.0070617	0.0407908
Kcnk3	1098.27	2504.99	1801.63	-1.18924	0.278702	-4.26708	1.98048e-05	0.000290132
Kcnn3	86.34	229.44	157.892	-1.40799	0.380543	-3.69995	0.00021564	0.00230958
Kcnn4	174.06	95.79	134.925	0.859103	0.437424	1.964	0.0495298	0.175032
Kcnq1	337.21	831.09	584.151	-1.30247	0.205328	-6.34335	2.24819e-10	9.59949e-09
Kcnq4	216.43	551.28	383.858	-1.34802	0.373605	-3.60815	0.000308392	0.00311741
Kcns3	176.8	358.72	267.76	-1.01975	0.339249	-3.00589	0.00264803	0.0185859
Kcnt2	214.56	128.76	171.66	0.735507	0.361591	2.03408	0.0419432	0.155714
Kcnv2	115.02	244.77	179.892	-1.09007	0.340535	-3.20104	0.00136932	0.0109366
Kcp	30.47	2.52	16.4958	3.60039	1.56649	2.29838	0.0215403	0.094858
Kctd11	153.53	84.16	118.844	0.867714	0.414096	2.09544	0.0361316	0.13971
Kctd12	2563.33	1469.31	2016.32	0.802913	0.216057	3.7162	0.000202238	0.002188
Kdm5d	1467.87	959.83	1213.85	0.612719	0.247395	2.47668	0.0132609	0.0660241
Kdr	1509.34	752.02	1130.68	1.00454	0.296716	3.38552	0.000710425	0.00634784
Khdrbs3	440.29	897.99	669.139	-1.02839	0.326847	-3.14639	0.00165298	0.0127065
Kif11	457.99	100.5	279.247	2.19116	0.332959	6.58088	4.67685e-11	2.27637e-09
Kif14	123.37	6.46	64.9108	4.23239	1.25475	3.37309	0.000743304	0.0066011
Kif15	335.63	132.49	234.058	1.34271	0.30033	4.47077	7.79394e-06	0.000129591
Kif18a	75.95	14.6	45.2751	2.38567	1.09853	2.17169	0.0298791	0.121458
Kif18b	142.12	12.52	77.3193	3.51778	0.958785	3.66899	0.000243506	0.00254506
Kif1a	354.44	106.89	230.663	1.73061	0.532985	3.24702	0.00116618	0.00957587
Kif20a	351.53	71.75	211.637	2.29249	0.344335	6.65775	2.7805e-11	1.41338e-09
Kif20b	314.7	82.13	198.418	1.94005	0.39572	4.90259	9.45797e-07	1.94654e-05
Kif21b	533.96	116.61	325.284	2.19085	0.345024	6.34984	2.15532e-10	9.22755e-09
Kif22	202.74	26.5	114.617	2.92919	0.500626	5.85106	4.88447e-09	1.57364e-07
Kif23	317.53	41.61	179.573	2.93554	0.496022	5.91817	3.25544e-09	1.10203e-07
Kif26b	2272.65	1057.18	1664.91	1.1048	0.212624	5.19601	2.03616e-07	4.83007e-06
Kif2c	111.27	6.38	58.8276	4.14505	1.31832	3.14418	0.00166554	0.0127846
Kif4a	249.21	31.6	140.408	2.98608	0.574268	5.1998	1.99503e-07	4.74657e-06
Kif5b	8269.82	13764.9	11017.3	-0.735124	0.138151	-5.32116	1.03109e-07	2.59587e-06
Kif5c	274.35	134.29	204.32	1.03293	0.406003	2.54415	0.0109545	0.0572838
Kifc1	183.21	33.4	108.307	2.451	0.506292	4.84108	1.29133e-06	2.59108e-05
Kifc3	1276.62	690.62	983.619	0.887142	0.175356	5.05909	4.21261e-07	9.42072e-06
Klb	49.4	174.98	112.191	-1.82829	0.467677	-3.90929	9.25686e-05	0.00111612
Klf12	425.73	778.02	601.878	-0.868616	0.263011	-3.30259	0.000957961	0.00810723
Klf15	632.77	1311.54	972.158	-1.05161	0.260894	-4.03079	5.559e-05	0.000712086
Klf16	241.58	99.68	170.627	1.27946	0.44468	2.87726	0.00401148	0.0260048
Klf9	2108.37	3479.44	2793.91	-0.722808	0.179301	-4.03126	5.54793e-05	0.000711807
Klhdc9	14.39	0	7.19661	6.39124	2.09537	3.05017	0.00228712	0.0165259
Klhl17	291.89	468.53	380.211	-0.682051	0.238629	-2.85821	0.00426039	0.0272542
Klhl2	1048.21	518.56	783.382	1.01528	0.19163	5.29813	1.16997e-07	2.90894e-06
Klhl23	224.69	484	354.346	-1.10578	0.380964	-2.90259	0.00370091	0.0242666
Klhl30	135.54	269.29	202.413	-0.991315	0.340948	-2.90752	0.00364303	0.0239459
Klhl31	279.4	1702.62	991.011	-2.60751	0.47636	-5.47383	4.40408e-08	1.16945e-06
Klhl38	108.82	272.07	190.446	-1.31996	0.387565	-3.40576	0.000659795	0.00595526
Klhl6	130.95	50.76	90.8577	1.36793	0.58224	2.34942	0.0188026	0.0863647
Klhl7	540.05	926.32	733.188	-0.779285	0.175611	-4.43757	9.09802e-06	0.000148197
Klra1	118.13	26.75	72.4406	2.14471	0.524242	4.09107	4.29387e-05	0.000569151
Klra2	22.79	0	11.3963	7.05336	2.49445	2.82762	0.00468948	0.0294197
Klri1	10.59	0	5.29394	5.94708	3.01264	1.97405	0.0483764	0.172287
Klrk1	103.51	21.78	62.6452	2.24311	0.66754	3.36025	0.000778706	0.0068509
Kng1	18.32	0	9.16207	6.73895	2.61053	2.58145	0.00983872	0.0525651
Kng1l1	32.28	0	16.1402	7.55581	2.31946	3.25758	0.00112367	0.0092692
Knl1	158.63	51.3	104.965	1.6295	0.496825	3.27983	0.00103869	0.00866221
Knstrn	194.69	35.7	115.193	2.45418	0.545716	4.49717	6.88623e-06	0.000116066
Kntc1	205.65	20.52	113.086	3.31925	0.908582	3.65322	0.000258968	0.00268215
Krt2	86.18	619.43	352.801	-2.84616	0.382897	-7.43321	1.0599e-13	7.67923e-12
Kyat3	103.55	181.94	142.749	-0.814602	0.414642	-1.96459	0.0494616	0.17483
L2hgdh	57.11	214.81	135.96	-1.9157	0.552846	-3.46517	0.000529906	0.00495611
Lacc1	336.21	207.05	271.632	0.699268	0.25324	2.76128	0.00575746	0.0346443
Lactb	342.68	227.63	285.156	0.589257	0.288057	2.04563	0.0407932	0.152674
Lama1	23.24	0	11.6182	7.08173	2.47447	2.86192	0.00421084	0.0270014
Lama3	360.53	211.05	285.79	0.77224	0.315943	2.44424	0.0145157	0.0706462
Lama5	7332.71	4743.34	6038.02	0.628404	0.146187	4.29863	1.7186e-05	0.000258145
Lamc1	25393.9	16084.4	20739.2	0.658808	0.0865604	7.61096	2.72064e-14	2.08435e-12
Lamc3	259.81	1167.34	713.575	-2.16695	0.364456	-5.94569	2.75293e-09	9.45922e-08
Lamtor5	180.54	311.97	246.255	-0.791121	0.348223	-2.27188	0.0230938	0.099913
Lancl3	1.68	19.79	10.7383	-3.53747	1.70316	-2.07701	0.0378005	0.144179
Laptm4b	634.59	999.01	816.8	-0.653632	0.24726	-2.6435	0.00820539	0.0457787
Laptm5	797.06	187.49	492.274	2.08932	0.336655	6.2061	5.43145e-10	2.18513e-08
Large1	2495.53	1492.05	1993.79	0.742572	0.192816	3.85119	0.000117544	0.0013738
Larp6	164.59	407.23	285.913	-1.30641	0.330163	-3.95687	7.59398e-05	0.000937508
Lasp1	4967.08	3109.38	4038.23	0.676027	0.143462	4.71223	2.45021e-06	4.64293e-05
Lat2	147.18	46.4	96.7898	1.66126	0.602033	2.75942	0.00579044	0.0347534
Layn	473.33	180.64	326.985	1.38809	0.259885	5.34116	9.23559e-08	2.36608e-06
Lbh	2814.79	875.46	1845.12	1.68427	0.149812	11.2426	2.51847e-29	8.76646e-27
Lbp	9794.13	1533.9	5664.01	2.67453	0.271961	9.83426	8.01508e-23	1.52783e-20
Lck	93.49	18.15	55.8172	2.36994	1.10459	2.14554	0.0319101	0.127704
Lcp1	2845.46	708.55	1777	2.00593	0.211275	9.49443	2.21425e-21	3.65511e-19
Ldhd	156.55	405.26	280.905	-1.37199	0.354839	-3.86652	0.000110401	0.00130484
Ldoc1l	497.6	792.49	645.044	-0.670738	0.204244	-3.28401	0.00102342	0.0085661
Leo1	629.62	1010.07	819.846	-0.682058	0.169249	-4.0299	5.58007e-05	0.000713642
Letmd1	628.43	968.14	798.285	-0.623238	0.264891	-2.35281	0.0186323	0.0859275
Lfng	694.42	391.53	542.976	0.826989	0.278738	2.9669	0.00300816	0.0205664
Lgals3	1826.79	544.84	1185.81	1.74547	0.14039	12.433	1.72974e-35	9.55055e-33
Lgals3bp	3098.39	1132.65	2115.52	1.45118	0.214856	6.75419	1.43632e-11	7.64063e-10
Lgi1	0	19.01	9.50596	-6.6074	1.91926	-3.44267	0.000575995	0.0053103
Lgmn	4295.91	2006.26	3151.08	1.09832	0.179991	6.10207	1.04705e-09	3.96345e-08
Lgr4	887.02	496.68	691.849	0.835311	0.283509	2.94633	0.0032157	0.0217073
Lgr6	1127.15	2412.84	1769.99	-1.09762	0.187242	-5.86206	4.5715e-09	1.48476e-07
Lhfpl1	3.7	42.19	22.9458	-3.49954	1.51053	-2.31677	0.0205164	0.0917621
Lhfpl2	547.64	253.34	400.488	1.111	0.251126	4.42407	9.68578e-06	0.000156497
Lhx6	185.91	40.67	113.287	2.18394	0.5681	3.84429	0.000120903	0.00140486
Lias	139.6	270.56	205.084	-0.95418	0.383301	-2.48938	0.0127968	0.0641012
Lif	78.52	20.93	49.7259	1.90838	0.799928	2.38569	0.0170469	0.0799522
Lifr	1604.75	2740.57	2172.66	-0.772079	0.253637	-3.04403	0.0023343	0.0167835
Lig1	508.15	271.26	389.704	0.906039	0.331978	2.72921	0.0063486	0.0374322
Lilra5	134.1	57.97	96.0349	1.20985	0.48898	2.47423	0.0133523	0.0663816
Lilrb3a	115.6	41.85	78.7243	1.46044	0.656662	2.22403	0.0261464	0.109912
Lilrb3l	102.62	30.07	66.3425	1.77831	0.553447	3.21315	0.00131286	0.0105791
Lilrb4	222.84	16.4	119.62	3.7587	0.511938	7.3421	2.1026e-13	1.45116e-11
Lilrc2	10.47	0	5.23585	5.9333	3.00397	1.97515	0.0482511	0.172109
Lima1	4115.14	2147.93	3131.54	0.938383	0.195083	4.81017	1.50804e-06	2.98845e-05
Limch1	1920.67	7200.3	4560.49	-1.90612	0.155938	-12.2236	2.32615e-34	1.16395e-31
Limd2	216.51	75.97	146.241	1.5062	0.604879	2.49009	0.0127711	0.0640035
Limk1	397.56	237.26	317.407	0.74346	0.296293	2.5092	0.0121003	0.0617827
Lims2	1503.97	3389.94	2446.96	-1.17247	0.252085	-4.65106	3.30227e-06	6.07769e-05
Lipe	2174.12	3278.48	2726.3	-0.592588	0.22414	-2.64383	0.00819729	0.0457592
Litaf	1418.08	615.08	1016.58	1.20442	0.165845	7.26235	3.80419e-13	2.53803e-11
Lix1	0	18.14	9.06966	-6.54002	2.66846	-2.45086	0.0142515	0.0696353
Lmnb1	801.63	207.82	504.721	1.94484	0.226618	8.58202	9.32204e-18	1.09753e-15
Lmnb2	358.64	233.96	296.298	0.61579	0.304092	2.02501	0.042866	0.157968
Lmntd1	127.28	25.77	76.5275	2.29429	0.671041	3.419	0.000628523	0.00574096
Lmo2	573.61	380.76	477.185	0.589828	0.266736	2.21128	0.0270163	0.11277
Lmod1	10612.2	30938.2	20775.2	-1.54362	0.237302	-6.50485	7.77721e-11	3.5991e-09
Lmtk3	0	32.48	16.2412	-7.38082	1.79182	-4.11917	3.80242e-05	0.000509578
Lnx1	165.42	504.24	334.827	-1.60695	0.272285	-5.90174	3.59682e-09	1.19984e-07
LOC100134871	206.06	413.62	309.841	-1.00655	0.425358	-2.36635	0.0179645	0.0834486
LOC100233176	450.33	682.21	566.272	-0.598555	0.273184	-2.19103	0.0284495	0.117134
LOC100359539	100.63	17.47	59.0469	2.51417	0.608128	4.13428	3.56068e-05	0.000482349
LOC100359633	25.74	0	12.8691	7.22926	2.42245	2.98427	0.00284255	0.0196354
LOC100359656	11.35	0	5.6752	6.04738	2.95501	2.04648	0.040709	0.15246
LOC100359692	52.76	4.1	28.4277	3.71808	1.13232	3.2836	0.00102491	0.00856961
LOC100360205	5623.98	3054.28	4339.13	0.880695	0.179261	4.91292	8.97289e-07	1.8524e-05
LOC100360522	415.15	224.29	319.719	0.889549	0.274814	3.23692	0.00120828	0.00987087
LOC100360552	1163.06	542.5	852.777	1.09934	0.18476	5.95011	2.67961e-09	9.31814e-08
LOC100360754	404.33	123.34	263.836	1.71253	0.294486	5.81533	6.05129e-09	1.90735e-07
LOC100360779	52.11	10.01	31.0621	2.36972	1.16899	2.02715	0.0426471	0.157488
LOC100360950	323.66	139.84	231.748	1.21067	0.281758	4.29684	1.73251e-05	0.000259747
LOC100361018	78.14	10.77	44.4554	2.8503	0.815611	3.49468	0.000474628	0.00451024
LOC100361087	16.16	65.78	40.9703	-2.02662	0.685029	-2.95845	0.0030919	0.0210313
LOC100363372	119.19	211.95	165.57	-0.829694	0.395811	-2.09619	0.0360654	0.139521
LOC100363502	190.15	508.32	349.232	-1.41823	0.63172	-2.24503	0.0247663	0.105411
LOC100364016	74.32	15.95	45.1309	2.21798	0.683239	3.24627	0.00116929	0.00959153
LOC100364062	209.03	122.51	165.77	0.771831	0.363718	2.12206	0.0338331	0.133235
LOC100364500	276.04	160.02	218.033	0.787944	0.371817	2.11917	0.0340758	0.133994
LOC100365043	414.42	81.9	248.159	2.33911	0.352193	6.64155	3.10411e-11	1.55809e-09
LOC100365773	0	14.14	7.07176	-6.18281	2.77881	-2.22499	0.0260819	0.109843
LOC100366044	759.58	1180.55	970.065	-0.636496	0.236442	-2.69197	0.00710307	0.0410001
LOC100909569	75.83	146.82	111.327	-0.951742	0.385673	-2.46774	0.0135969	0.0672784
LOC100909776	1.16	16.21	8.68401	-3.85222	1.91376	-2.0129	0.0441247	0.161324
LOC100909835	5.65	32.27	18.9621	-2.51625	0.989157	-2.54384	0.0109642	0.0573159
LOC100910200	294.92	80.13	187.525	1.87707	0.372321	5.04154	4.61798e-07	1.02131e-05
LOC100910438	10.63	0	5.31516	5.95364	3.00782	1.97939	0.0477723	0.170896
LOC100910554	147.55	24.56	86.0583	2.58637	0.918823	2.81487	0.00487973	0.030367
LOC100910650	0	31.17	15.5851	-7.32184	1.65883	-4.41386	1.01546e-05	0.000162595
LOC100910720	22.35	0	11.1758	7.02502	3.2094	2.18889	0.0286048	0.117652
LOC100910788	247.87	438.49	343.181	-0.82366	0.32047	-2.57016	0.0101651	0.0539669
LOC100910838	12.21	0	6.10472	6.1527	2.21826	2.77366	0.0055429	0.0335677
LOC100910885	315.57	538.21	426.893	-0.771457	0.268617	-2.87196	0.00407933	0.0263699
LOC100910996	346.76	103.21	224.984	1.74729	0.344623	5.07014	3.97531e-07	8.92744e-06
LOC100911186	52.88	5.43	29.1558	3.29862	1.38962	2.37375	0.0176087	0.0821294
LOC100911190	217.23	59.79	138.51	1.86153	0.364074	5.11304	3.17012e-07	7.29309e-06
LOC100911413	2317.84	1026.23	1672.03	1.17482	0.287904	4.08062	4.49167e-05	0.000591452
LOC100911483	1814.58	2866.09	2340.33	-0.659735	0.286024	-2.30657	0.0210787	0.0933918
LOC100911515	251.45	97.38	174.412	1.36918	0.658698	2.07861	0.0376531	0.143906
LOC100911660	13.53	0	6.76367	6.30256	2.80204	2.24927	0.0244952	0.104563
LOC100911672	179.54	77.25	128.395	1.21431	0.566485	2.14359	0.0320661	0.1282
LOC100911832	470.99	267.54	369.264	0.815515	0.264586	3.08224	0.00205452	0.0151599
LOC100911928	17.51	0	8.75687	6.67508	2.70542	2.4673	0.0136135	0.0673399
LOC100912218	38.32	4.77	21.5413	3.02667	1.37656	2.19872	0.0278977	0.115277
LOC100912338	1258.56	504.06	881.309	1.32145	0.271908	4.8599	1.17444e-06	2.38341e-05
LOC100912426	0	8.74	4.37133	-5.48712	2.49743	-2.19711	0.0280129	0.115634
LOC100912479	206.6	32.01	119.303	2.69451	0.991702	2.71706	0.00658654	0.0386455
LOC100912526	5.75	35.12	20.439	-2.60039	1.1748	-2.21347	0.0268649	0.112343
LOC100912571	210.93	59.86	135.397	1.81449	0.752241	2.41211	0.0158604	0.0755147
LOC100912659	146.81	72.17	109.49	1.02419	0.478845	2.13887	0.0324459	0.12946
LOC100912948	7.34	0	3.66858	5.4194	2.61073	2.07582	0.037911	0.144497
LOC102546589	0	15.78	7.88836	-6.33878	2.77438	-2.28475	0.0223273	0.097364
LOC102546845	24.94	104.18	64.5569	-2.0592	0.579343	-3.55437	0.000378887	0.0037265
LOC102547078	42.16	154.62	98.392	-1.87744	0.645804	-2.90713	0.00364761	0.0239662
LOC102547622	94.61	197.44	146.025	-1.0629	0.497688	-2.13568	0.0327054	0.130236
LOC102548682	582.71	200.02	391.362	1.54508	0.292441	5.28337	1.2683e-07	3.14365e-06
LOC102549061	493.18	130.74	311.961	1.91854	0.51433	3.73016	0.000191356	0.00209146
LOC102549173	550.96	69.03	309.998	2.99288	0.426554	7.01641	2.27644e-12	1.35503e-10
LOC102549615	12.81	0	6.40434	6.22118	2.92041	2.13024	0.0331517	0.131588
LOC102549694	41.55	1.42	21.4841	4.93937	1.53823	3.21108	0.00132238	0.0106455
LOC102550424	0	23.25	11.6266	-6.90013	2.46781	-2.79605	0.00517314	0.0317852
LOC102551184	1780.72	1001.05	1390.89	0.831613	0.205915	4.03863	5.37647e-05	0.000694259
LOC102551403	0	24.21	12.1072	-6.95934	2.57828	-2.69921	0.00695034	0.0402637
LOC102551518	607.16	334.19	470.671	0.861407	0.273459	3.15004	0.00163248	0.0125851
LOC102551815	22.17	66.86	44.5127	-1.59435	0.762517	-2.0909	0.0365367	0.140943
LOC102552055	1021.82	217.24	619.528	2.23283	0.507188	4.40237	1.07076e-05	0.000170766
LOC102552324	76.07	14.41	45.243	2.3993	0.735489	3.26219	0.00110556	0.00914371
LOC102552895	8088.47	4869.51	6478.99	0.732307	0.163846	4.46949	7.84053e-06	0.000130007
LOC102553382	84.42	27.67	56.042	1.61231	0.550781	2.92731	0.00341906	0.0227918
LOC102553500	284.06	137.3	210.682	1.04913	0.26481	3.96184	7.43756e-05	0.000921799
LOC102554066	3.36	48.65	26.0049	-3.84063	1.39497	-2.7532	0.0059015	0.0353252
LOC102554315	245.64	372.88	309.26	-0.603211	0.258452	-2.33394	0.0195988	0.0890008
LOC102554501	0	33.82	16.9087	-7.44141	1.71829	-4.33071	1.48627e-05	0.000227517
LOC102554639	28.15	0	14.0774	7.35835	2.38666	3.08312	0.00204845	0.015122
LOC102554838	26.7	0	13.3487	7.28188	1.75678	4.14501	3.39792e-05	0.000463043
LOC102555217	35.15	79.1	57.1243	-1.17054	0.531736	-2.20135	0.0277109	0.114831
LOC102555330	18.65	0	9.32542	6.76497	1.96166	3.4486	0.000563502	0.00523364
LOC102555503	12.5	0	6.24812	6.18824	2.8611	2.16289	0.0305498	0.12362
LOC102555624	1.01	31.59	16.3013	-4.9413	1.62717	-3.03674	0.00239151	0.0171027
LOC102555672	80.69	197.68	139.182	-1.29521	0.452627	-2.86155	0.00421581	0.0270014
LOC102556096	67	12.75	39.8751	2.3884	1.14308	2.08945	0.0366671	0.141405
LOC103689965	7697.91	2338.49	5018.2	1.71852	0.22211	7.73725	1.01593e-14	8.60696e-13
LOC103689985	0	15.99	7.99451	-6.35691	2.73144	-2.32732	0.0199484	0.0900266
LOC103690073	138.08	35.55	86.8168	1.96363	0.592158	3.31605	0.000912986	0.0077925
LOC103690128	154.84	335.61	245.224	-1.11521	0.371323	-3.00333	0.00267043	0.0186802
LOC103690154	69.97	26.55	48.2575	1.40039	0.601585	2.32783	0.0199209	0.0899278
LOC103690190	276.31	56.86	166.582	2.2824	0.372271	6.13102	8.73164e-10	3.37708e-08
LOC103690962	1331.45	2191.87	1761.66	-0.71865	0.170792	-4.20775	2.57922e-05	0.000363543
LOC103691267	131.53	273.86	202.699	-1.0566	0.480746	-2.19783	0.0279611	0.115479
LOC103691544	141.29	428.26	284.777	-1.59776	0.481015	-3.32165	0.000894864	0.00768288
LOC103691556	0	12.87	6.43551	-6.04447	2.87574	-2.10188	0.0355634	0.138147
LOC103692002	588.92	910.73	749.825	-0.627978	0.274405	-2.28851	0.0221077	0.0967184
LOC103692529	122.16	367.32	244.738	-1.58619	0.431908	-3.67252	0.000240175	0.00251845
LOC103692813	259.08	47.25	153.168	2.45179	0.368226	6.65838	2.76853e-11	1.41177e-09
LOC103693189	19.04	118.53	68.7862	-2.63927	0.916935	-2.87837	0.00399742	0.0259242
LOC103693210	14.33	52.84	33.5828	-1.87994	0.839403	-2.23961	0.0251162	0.106646
LOC103693389	206.34	79.98	143.158	1.36715	0.422491	3.23593	0.00121248	0.00989509
LOC103693480	609.13	1093.9	851.515	-0.844207	0.185128	-4.56012	5.11235e-06	8.94634e-05
LOC103693936	87.37	204.2	145.784	-1.22561	0.563687	-2.17428	0.029684	0.120849
LOC103694538	12.11	0	6.05729	6.14183	2.20825	2.78131	0.00541404	0.0329542
LOC103694571	9.07	0	4.53574	5.72359	2.47824	2.30954	0.0209136	0.0930966
LOC103694876	29.25	90.35	59.8033	-1.62477	0.78877	-2.05988	0.0394103	0.1489
LOC103695096	27.72	64.22	45.9726	-1.21346	0.58783	-2.0643	0.0389891	0.147692
LOC108348050	0	52.56	26.2797	-8.07757	1.82452	-4.42723	9.54509e-06	0.00015438
LOC108348052	11.17	0	5.5832	6.02589	2.95769	2.03737	0.0416132	0.154812
LOC108348061	358.27	959.3	658.788	-1.42035	0.429397	-3.30778	0.000940384	0.00799651
LOC108348062	14.97	62.63	38.7974	-2.06354	0.971023	-2.12512	0.0335766	0.132682
LOC108348072	21.53	0	10.7642	6.97237	3.2246	2.16224	0.0305994	0.123789
LOC108348139	40.04	0.71	20.3752	5.88505	2.18167	2.6975	0.00698631	0.0404282
LOC108348154	38.14	94.07	66.1048	-1.29774	0.571129	-2.27224	0.0230719	0.0998452
LOC108348302	236.68	364.98	300.829	-0.624177	0.277358	-2.25044	0.0244213	0.104331
LOC108350550	0	11.58	5.78923	-5.89102	2.96794	-1.98488	0.0471576	0.169454
LOC108350623	0	17.83	8.91551	-6.51763	2.14689	-3.03585	0.00239858	0.017115
LOC108351053	324.68	574.51	449.596	-0.822749	0.285349	-2.88331	0.00393524	0.0255623
LOC108351576	0	21.79	10.8955	-6.80604	2.52516	-2.69529	0.00703266	0.040667
LOC108352957	517.08	338.78	427.928	0.611646	0.239364	2.5553	0.0106098	0.0559011
LOC108353138	0	15.47	7.7372	-6.31364	2.7676	-2.28127	0.0225327	0.0979714
LOC108353140	27.55	5.73	16.6367	2.25868	1.01528	2.22468	0.0261026	0.109872
LOC259244	8.86	181.41	95.1382	-4.35984	2.13973	-2.03756	0.0415939	0.154776
LOC288978	30.51	83.49	57.0017	-1.45239	0.622083	-2.33472	0.0195579	0.0888654
LOC290876	46.69	2.83	24.7619	4.04606	1.53439	2.63692	0.00836623	0.0464816
LOC303566	23.66	1.57	12.619	3.91548	1.69041	2.31629	0.0205425	0.0917783
LOC308990	116.62	48.55	82.5869	1.26978	0.617817	2.05527	0.0398528	0.150217
LOC310926	69613.4	41989.3	55801.3	0.729363	0.290277	2.51265	0.0119829	0.0613002
LOC312273	16.07	0	8.03725	6.54957	2.6991	2.42657	0.0152422	0.0734674
LOC314407	217.69	354.39	286.037	-0.701459	0.307121	-2.28399	0.0223724	0.0974766
LOC361016	47.02	4.09	25.5566	3.52513	1.59778	2.20626	0.0273658	0.113813
LOC361346	511.87	319.02	415.445	0.683151	0.211228	3.23419	0.0012199	0.00994554
LOC363337	0	8.29	4.14518	-5.4096	2.54829	-2.12284	0.0337677	0.133111
LOC367277	19	0	9.49929	6.79162	1.90546	3.56429	0.000364845	0.00360611
LOC498265	66.5	8.03	37.2628	3.0558	1.17205	2.60723	0.00912772	0.0497119
LOC498426	388.35	640.8	514.575	-0.723846	0.318703	-2.27122	0.0231336	0.100031
LOC499229	316.86	151.9	234.38	1.06018	0.378782	2.79892	0.00512738	0.0316011
LOC499240	13.49	0	6.74559	6.29854	2.20704	2.85384	0.00431946	0.0275441
LOC500265	30.1	0	15.052	7.45634	2.33884	3.18805	0.00143234	0.0113426
LOC501038	0	20.94	10.4704	-6.74993	2.66006	-2.53751	0.0111644	0.0582292
LOC501110	158.51	350.74	254.623	-1.14448	0.293657	-3.89733	9.7259e-05	0.00116593
LOC619574	687.84	456.69	572.266	0.590671	0.211129	2.79768	0.00514706	0.0316614
LOC679894	5798.24	1735.27	3766.75	1.7406	0.192687	9.03331	1.66553e-19	2.24105e-17
LOC679924	46.85	203.66	125.254	-2.11626	0.517153	-4.09214	4.27408e-05	0.000566997
LOC680039	1912.94	3063.23	2488.08	-0.679376	0.122413	-5.54985	2.85911e-08	7.89313e-07
LOC680322	124.08	3.12	63.6018	5.32258	0.717951	7.41358	1.22938e-13	8.8273e-12
LOC680498	253.28	42.65	147.962	2.57673	0.621458	4.14627	3.37934e-05	0.000461689
LOC680835	1139.3	708.47	923.884	0.685208	0.220649	3.10542	0.00190009	0.0142303
LOC682402	1955.63	1292.55	1624.09	0.597954	0.220852	2.70748	0.00677955	0.0395173
LOC683897	272.46	421.98	347.218	-0.630634	0.264376	-2.38537	0.017062	0.0799522
LOC684509	55.71	140.76	98.2326	-1.3398	0.501833	-2.66982	0.00758926	0.0429548
LOC684762	197.14	65.6	131.372	1.5929	0.556592	2.86187	0.00421144	0.0270014
LOC684828	818.3	268.84	543.57	1.60519	0.259232	6.19209	5.93721e-10	2.38262e-08
LOC685025	198.01	105.85	151.926	0.901073	0.358044	2.51666	0.0118474	0.060821
LOC685152	4071.74	2605.94	3338.84	0.643861	0.14083	4.57189	4.83352e-06	8.51422e-05
LOC685275	17.77	0	8.88694	6.69563	2.67116	2.50664	0.0121885	0.0620508
LOC685279	0	23.63	11.8131	-6.92199	2.47253	-2.79955	0.00511733	0.0315513
LOC687532	31.36	163.34	97.3501	-2.38098	1.0363	-2.29759	0.0215854	0.0949519
LOC688459	20.75	0	10.3743	6.91793	1.87445	3.69065	0.000223681	0.00238454
LOC688672	269.14	109.49	189.316	1.29849	0.347074	3.74126	0.000183098	0.00201773
LOC688765	102.92	31.25	67.0875	1.71322	0.560032	3.05915	0.00221967	0.0161258
LOC688869	905.31	1495.62	1200.47	-0.724685	0.245216	-2.95529	0.00312372	0.0211936
LOC689574	234.91	400.73	317.821	-0.770359	0.300898	-2.5602	0.0104611	0.0552814
LOC690097	27.7	0	13.8512	7.33645	2.3729	3.09176	0.00198973	0.0147909
LOC690126	44.95	5.37	25.1631	3.07163	0.926151	3.31655	0.000911356	0.00778273
LOC690422	154.25	68.78	111.516	1.16397	0.517189	2.25056	0.0244132	0.104324
LOC690871	347.32	611.36	479.336	-0.816812	0.348324	-2.34498	0.0190282	0.0871012
LOC691113	487.93	279.74	383.834	0.803788	0.257853	3.11724	0.00182556	0.0137492
LOC691485	329.99	579.48	454.738	-0.811739	0.370696	-2.18977	0.0285408	0.117449
Lox	13338.3	7793.61	10566	0.775324	0.21821	3.55312	0.000380695	0.0037374
Loxl2	3046.42	1685.11	2365.77	0.853719	0.180657	4.72564	2.29387e-06	4.36735e-05
Loxl3	1362.84	476.64	919.736	1.51575	0.211428	7.16908	7.55018e-13	4.81647e-11
Lpar1	1064.86	694.74	879.801	0.616677	0.286132	2.15522	0.0311447	0.125362
Lpar5	24.68	0	12.339	7.1697	2.42935	2.95129	0.00316452	0.0214251
Lpcat2	144.06	44.34	94.1963	1.70013	0.551641	3.08194	0.00205654	0.0151678
Lpcat4	162.2	71.47	116.835	1.18447	0.429582	2.75725	0.00582899	0.0349172
Lpin1	926.16	2109.88	1518.02	-1.1878	0.36097	-3.29059	0.00099979	0.00839398
Lpin3	439.4	263.08	351.239	0.737837	0.262514	2.81066	0.00494406	0.0306838
Lpp	17394.2	32231.6	24812.9	-0.889832	0.191581	-4.64468	3.40605e-06	6.22576e-05
Lpxn	190.54	78.4	134.47	1.28099	0.421978	3.03569	0.0023999	0.0171168
Lrat	498.99	77.75	288.369	2.68562	0.434343	6.18318	6.28227e-10	2.49607e-08
Lrba	1183.66	2207.89	1695.77	-0.899191	0.187396	-4.79834	1.59984e-06	3.14701e-05
Lrch2	162.77	430.34	296.553	-1.40093	0.33984	-4.12232	3.75082e-05	0.000505422
Lrch4	801.33	506.95	654.144	0.660347	0.180371	3.66105	0.000251184	0.00260827
Lrg1	476.48	306.12	391.3	0.63877	0.219571	2.90918	0.00362382	0.0238883
Lrig1	701.22	1657.49	1179.35	-1.24097	0.162818	-7.62186	2.50039e-14	1.93412e-12
Lrmp	157.9	73	115.45	1.11595	0.467819	2.38543	0.0170594	0.0799522
Lrp1	76847.6	49098.3	62973	0.646345	0.150113	4.30573	1.66438e-05	0.000250943
Lrp11	224.22	545.72	384.969	-1.28311	0.208831	-6.14424	8.03467e-10	3.15321e-08
Lrp2bp	22.55	1.42	11.9827	4.04946	1.65411	2.44812	0.0143603	0.0700598
Lrp5	2597.32	4348.55	3472.93	-0.743202	0.130507	-5.69474	1.23561e-08	3.66381e-07
Lrp8	303.98	127.21	215.598	1.25357	0.482626	2.5974	0.00939327	0.0508813
Lrpprc	1362.81	2406.25	1884.53	-0.820306	0.268646	-3.05348	0.00226204	0.0163743
Lrrc1	116.76	57.47	87.1119	1.02404	0.444989	2.30127	0.0213764	0.0943179
Lrrc10b	0	15.16	7.57972	-6.2802	2.75805	-2.27705	0.0227834	0.0988011
Lrrc14b	65.35	199.32	132.334	-1.61042	0.794292	-2.02749	0.0426122	0.157467
Lrrc15	95.76	14.71	55.233	2.69965	0.733546	3.68028	0.000232981	0.00245913
Lrrc17	445.79	1209.07	827.433	-1.43842	0.3015	-4.7709	1.83405e-06	3.54244e-05
Lrrc24	27.64	81.24	54.4397	-1.55211	0.601216	-2.58161	0.00983393	0.052557
Lrrc25	387.61	58.44	223.025	2.72814	0.319971	8.5262	1.51237e-17	1.72972e-15
Lrrc27	0	17.17	8.58746	-6.46409	2.76033	-2.34179	0.0191917	0.0876991
Lrrc34	21.44	0	10.7178	6.96578	1.88813	3.68924	0.000224925	0.00239621
Lrrc59	2611.31	1666.02	2138.66	0.648302	0.16716	3.87832	0.00010518	0.00125215
Lrrc73	35.12	3.5	19.3067	3.29862	1.52712	2.16003	0.0307706	0.124293
Lrrc8c	1401.31	867.11	1134.21	0.691636	0.195669	3.53473	0.000408189	0.0039732
Lrrn3	84.02	34.15	59.0822	1.30219	0.656701	1.98293	0.0473757	0.16988
Lrrn4cl	166.99	54.38	110.685	1.61539	0.501672	3.22002	0.0012818	0.0103605
Lsamp	223.59	2572.69	1398.14	-3.52226	0.328429	-10.7246	7.80502e-27	2.23168e-24
Lsm4	419.31	277.26	348.283	0.596481	0.265451	2.24705	0.0246368	0.105065
Lsmem1	3.51	44.97	24.2418	-3.68027	1.87244	-1.9655	0.0493568	0.174642
Lsp1	3336.43	2210.35	2773.39	0.594463	0.152344	3.9021	9.53612e-05	0.00114548
Lsr	169.07	435.51	302.287	-1.36442	0.466727	-2.92337	0.0034626	0.0230246
Lst1	54.15	0	27.0726	8.3026	1.48095	5.60627	2.06728e-08	5.84829e-07
Ltbp2	85702	4113.48	44907.7	4.38106	0.166397	26.329	8.94239e-153	7.15927e-149
Ltbp4	7869.31	15589.1	11729.2	-0.986175	0.147563	-6.68309	2.33962e-11	1.21236e-09
Lum	15543.5	7828.78	11686.1	0.989525	0.201417	4.91282	8.97741e-07	1.8524e-05
Lurap1	53.45	100.32	76.8873	-0.906813	0.438626	-2.06739	0.0386971	0.146829
Luzp1	2721.75	1619.52	2170.64	0.749097	0.127876	5.85799	4.68507e-09	1.51857e-07
Lxn	887.66	485.77	686.716	0.870198	0.209699	4.14975	3.32835e-05	0.000455112
Ly6e	1178.23	600.92	889.575	0.971743	0.174954	5.55427	2.7878e-08	7.73627e-07
Ly6g6f	0	28.78	14.3906	-7.20655	1.85463	-3.88572	0.000102028	0.00121825
Ly75	148.8	13.1	80.9463	3.50848	0.944043	3.71643	0.000202054	0.00218748
Ly86	90.82	29.96	60.3884	1.59514	0.726258	2.19639	0.0280643	0.115786
Lyc2	16.78	0	8.3876	6.61134	1.99508	3.31383	0.000920289	0.00784647
Lyn	1229.87	586.5	908.183	1.06837	0.260627	4.09922	4.1455e-05	0.000550396
Lypd1	311.14	92.14	201.64	1.75308	0.69977	2.50522	0.0122376	0.0622254
Lypd6	4.07	46.48	25.2788	-3.50289	1.4622	-2.39564	0.0165916	0.0783161
Lyrm5	194.28	315.08	254.68	-0.697721	0.26474	-2.6355	0.00840144	0.0465831
Lyrm7	33.29	90.27	61.779	-1.43734	0.727398	-1.976	0.0481546	0.171918
Lyve1	3941.07	2006.52	2973.79	0.973784	0.146711	6.63744	3.19172e-11	1.59706e-09
Lyz2	10497.8	1962.84	6230.32	2.41941	0.197385	12.2573	1.53473e-34	7.92715e-32
Macrod1	212.75	443.84	328.293	-1.06132	0.403283	-2.6317	0.0084959	0.0470064
Madd	411.25	163.29	287.268	1.33128	0.267428	4.97808	6.42187e-07	1.38714e-05
Maf	3555.71	1833.6	2694.66	0.955751	0.187576	5.09528	3.48221e-07	7.9653e-06
Mafa	44.16	98.42	71.293	-1.15284	0.536661	-2.14817	0.0317	0.127054
Mafb	938.01	577.52	757.768	0.700187	0.278407	2.51497	0.0119041	0.0610287
Maff	1244.04	618.45	931.242	1.00823	0.203471	4.95517	7.22689e-07	1.53879e-05
Magi2	86.58	229.34	157.961	-1.40642	0.430013	-3.27063	0.00107307	0.00890716
Mall	242.42	99.1	170.761	1.29104	0.397351	3.24912	0.00115762	0.00951534
Mamdc2	483.16	1994.11	1238.63	-2.04539	0.193824	-10.5528	4.92818e-26	1.29361e-23
Maml3	247.93	126.79	187.359	0.964703	0.324089	2.97666	0.00291404	0.0200514
Mamstr	123.93	321.87	222.902	-1.37558	0.313272	-4.391	1.1283e-05	0.000178698
Man1b1	2055.8	1355.05	1705.42	0.601632	0.158262	3.8015	0.000143826	0.00163125
Man1c1	886.68	511.25	698.966	0.793965	0.259371	3.06112	0.00220511	0.0160346
Man2b1	2462.03	1332.52	1897.28	0.885965	0.157825	5.61359	1.98174e-08	5.62619e-07
Man2b2	1347.43	864.75	1106.09	0.64036	0.212618	3.01179	0.00259716	0.0183036
Mansc1	375.03	228.86	301.946	0.711998	0.244546	2.91151	0.00359684	0.0237593
Maoa	929.36	1580.89	1255.12	-0.767011	0.201432	-3.80779	0.000140217	0.00159231
Map1b	34415.4	66711.3	50563.4	-0.954849	0.120017	-7.95596	1.77753e-15	1.60801e-13
Map1s	686.28	443.41	564.846	0.629418	0.256942	2.44966	0.0142992	0.0698047
Map2k6	78.41	154.92	116.668	-0.982028	0.404015	-2.43067	0.0150708	0.0728689
Map3k7cl	779.08	1882.39	1330.73	-1.27251	0.274922	-4.62863	3.68088e-06	6.68234e-05
Map3k8	414.37	236.98	325.672	0.805791	0.284854	2.82879	0.00467247	0.029351
Map4k1	155.68	70.78	113.23	1.1341	0.393087	2.88511	0.00391271	0.0254263
Map4k2	341.57	636.97	489.27	-0.898567	0.313008	-2.87074	0.00409507	0.026457
Map6	1694.46	923.96	1309.21	0.874664	0.213237	4.10184	4.09871e-05	0.000544635
Map7d3	337.13	675.02	506.075	-1.00129	0.329411	-3.03964	0.00236858	0.0169842
Map9	359.63	678.5	519.064	-0.914907	0.320904	-2.85103	0.00435783	0.0277005
Mapk13	29.14	0	14.5678	7.4081	1.77818	4.16612	3.09823e-05	0.000426559
Mapk4	42.83	7.41	25.1192	2.52327	1.14462	2.20446	0.0274923	0.114221
Mapk8ip1	437.18	905.9	671.537	-1.05124	0.201923	-5.20611	1.92839e-07	4.61546e-06
Mapk8ip2	0	14.63	7.31324	-6.23212	2.76963	-2.25016	0.0244387	0.104378
Mapre3	297.52	578.13	437.823	-0.959315	0.342472	-2.80115	0.00509203	0.0314086
2024-03-01	80.83	15.95	48.3864	2.33941	0.73519	3.18205	0.00146236	0.0115336
2024-03-02	1029.05	1675.83	1352.44	-0.703412	0.188585	-3.72995	0.000191516	0.00209178
2024-03-03	323.26	121.64	222.449	1.40746	0.285777	4.92504	8.43435e-07	1.75619e-05
Marcks	2783.06	1593.63	2188.34	0.804716	0.228349	3.52405	0.000424997	0.0041019
Marcksl1	285.43	100.09	192.763	1.51402	0.350973	4.31377	1.60497e-05	0.00024313
Mast3	681.18	325.28	503.229	1.06581	0.25113	4.24407	2.19505e-05	0.000316364
Mastl	119.38	42.69	81.0347	1.48401	0.595211	2.49326	0.0126577	0.0636048
Matn2	1610.31	5435.79	3523.05	-1.7548	0.232854	-7.53604	4.84441e-14	3.64172e-12
Mavs	486.99	773.95	630.471	-0.669454	0.198119	-3.37905	0.000727371	0.00647757
Mb21d1	77.55	26.54	52.0436	1.54489	0.610981	2.52854	0.0114539	0.0592999
Mboat1	169.06	73.41	121.232	1.20387	0.357154	3.37074	0.000749668	0.00665024
Mboat2	44.57	103.1	73.8362	-1.21015	0.593742	-2.03817	0.0415327	0.154584
Mcc	344.02	532.32	438.169	-0.629014	0.283114	-2.22177	0.0262988	0.11035
Mccc1	443.19	752.37	597.778	-0.763713	0.364987	-2.09244	0.036399	0.140507
Mccc2	320.82	544.89	432.853	-0.765253	0.346116	-2.21097	0.0270378	0.112824
Mcm2	845.46	351.72	598.591	1.26458	0.232953	5.4285	5.68299e-08	1.49174e-06
Mcm3	583.85	106.66	345.255	2.4539	0.335679	7.31027	2.66604e-13	1.81654e-11
Mcm5	367.13	47.01	207.066	2.96349	0.436451	6.78997	1.12155e-11	6.04654e-10
Mcm6	683.96	177.91	430.938	1.94033	0.304402	6.37423	1.83888e-10	8.11133e-09
Mcph1	180.39	76.52	128.457	1.23359	0.460768	2.67724	0.00742317	0.0423139
Mcub	130.58	28.5	79.5387	2.18833	0.676363	3.23544	0.00121457	0.00990714
Mdc1	591.14	356	473.573	0.732527	0.30623	2.39208	0.0167531	0.0788971
Mdh1	1750.39	4250.81	3000.6	-1.28014	0.579687	-2.20833	0.027221	0.113358
Mdh2	1626.77	3809.89	2718.33	-1.22783	0.57899	-2.12065	0.0339517	0.13367
Mdk	132.78	521.91	327.342	-1.9725	0.389013	-5.07053	3.96704e-07	8.92137e-06
Me1	702.24	1918.06	1310.15	-1.45001	0.352205	-4.11696	3.83899e-05	0.000513963
Me3	20.63	236.27	128.451	-3.517	0.928585	-3.78748	0.000152181	0.00171359
Mecom	1691.21	2794.2	2242.71	-0.724099	0.181864	-3.98155	6.84676e-05	0.000858499
Mecr	129.88	260.92	195.402	-1.0076	0.339442	-2.9684	0.00299358	0.0204755
Med30	225.85	373.57	299.71	-0.72591	0.367124	-1.97729	0.0480087	0.171473
Mefv	167.29	28.05	97.668	2.5715	1.01337	2.53757	0.0111626	0.0582292
Melk	88.39	15.51	51.9491	2.50426	0.754371	3.31966	0.000901261	0.00772124
Meox1	471.6	83.66	277.634	2.48972	0.423599	5.87754	4.16401e-09	1.36908e-07
Mertk	298.08	151.51	224.796	0.976286	0.401717	2.43028	0.0150871	0.0728733
Met	309.26	483.52	396.386	-0.644293	0.24212	-2.66105	0.00778984	0.0438267
Metrnl	506.01	153.02	329.517	1.72787	0.308766	5.59606	2.19279e-08	6.18151e-07
Mettl15	65.07	129.33	97.1989	-0.993077	0.426447	-2.32872	0.0198739	0.0897916
Mettl16	360.24	565.85	463.047	-0.651733	0.242044	-2.69262	0.00708934	0.0409356
Mettl7a	647.41	1033.5	840.452	-0.674543	0.213927	-3.15315	0.00161519	0.0124698
Mettl8	51.23	107.08	79.152	-1.06628	0.54105	-1.97076	0.0487513	0.173353
Mex3a	133.74	37.6	85.6706	1.82896	0.617107	2.96376	0.00303906	0.0207423
Mfap2	172.82	555.48	364.148	-1.68328	0.299965	-5.61158	2.00488e-08	5.68179e-07
Mfge8	18131.1	5847.27	11989.2	1.63265	0.141607	11.5295	9.37304e-31	3.49026e-28
Mfn2	155.71	288.45	222.081	-0.890731	0.408637	-2.17976	0.0292751	0.119671
Mfsd1	735.98	401.32	568.647	0.874294	0.260585	3.35512	0.000793319	0.00696034
Mfsd4	36.92	100.44	68.6843	-1.44339	0.547421	-2.63671	0.00837142	0.0464944
Mgat2	1319.87	866.9	1093.39	0.606446	0.156609	3.87235	0.00010779	0.00127941
MGC105649	518.23	127.96	323.097	2.01493	0.363265	5.54672	2.91078e-08	8.02194e-07
MGC94207	316.79	504.76	410.773	-0.67066	0.250193	-2.68057	0.00734979	0.042006
MGC94335	310.12	484.5	397.314	-0.642723	0.277184	-2.31876	0.0204082	0.0913805
Mgp	73955.8	27819.9	50887.8	1.41051	0.148055	9.52698	1.61928e-21	2.70083e-19
Mgst3	105.92	519.25	312.583	-2.29345	0.658394	-3.4834	0.000495093	0.00466868
Micall1	1434.33	2244.93	1839.63	-0.646382	0.216518	-2.98535	0.00283255	0.0195832
Micall2	363.21	62.37	212.789	2.54006	0.281953	9.0088	2.08317e-19	2.75667e-17
Micu3	138.59	262.63	200.607	-0.923104	0.28004	-3.29632	0.000979591	0.00826407
Mif4gd	344.71	519.84	432.276	-0.591878	0.20227	-2.92618	0.00343154	0.0228655
Miga1	38.03	137.47	87.7518	-1.85324	0.740919	-2.50127	0.0123749	0.0626452
Mill1	2.31	79.59	40.9487	-5.15348	1.18912	-4.33387	1.46511e-05	0.000225138
Mipep	443.09	797.24	620.162	-0.847765	0.27613	-3.07017	0.00213939	0.0156634
Mir1949	77.41	28.89	53.1497	1.42857	0.665957	2.14513	0.0319423	0.12777
Mir3596a	4.39	22.82	13.6058	-2.39127	1.09698	-2.17987	0.0292673	0.11967
Mir568	90.18	158.06	124.118	-0.80962	0.39286	-2.06083	0.0393188	0.148624
Mis18bp1	125.4	34.24	79.818	1.87202	0.499991	3.74412	0.000181028	0.00200043
Misp	52.83	134.98	93.9066	-1.35541	0.530343	-2.55572	0.0105967	0.0558691
Mki67	2496.2	476.18	1486.19	2.39001	0.169058	14.1372	2.23892e-45	1.99164e-42
Mkl1	1851.8	1021.23	1436.52	0.858103	0.144136	5.95341	2.62608e-09	9.21102e-08
Mkln1	1051.82	1639.33	1345.58	-0.639795	0.150671	-4.24631	2.17319e-05	0.000314337
Mknk2	2007.24	3143	2575.12	-0.646778	0.158769	-4.07371	4.62697e-05	0.000606277
Mkx	0	13.65	6.82729	-6.1301	2.85031	-2.15068	0.0315014	0.126576
Mlec	6365.87	3784.8	5075.34	0.749934	0.114661	6.54043	6.13405e-11	2.94067e-09
Mlxipl	311.53	679.79	495.659	-1.12545	0.315441	-3.56787	0.000359894	0.00356157
Mme	112.04	275.45	193.748	-1.29717	0.512305	-2.53203	0.0113405	0.0588984
Mmp16	384.51	1795.31	1089.91	-2.22237	0.2466	-9.01203	2.02271e-19	2.69897e-17
Mmp19	677.5	246.93	462.217	1.45577	0.244766	5.94761	2.72082e-09	9.38323e-08
Mmp23	1249.44	771.2	1010.32	0.69691	0.188201	3.70302	0.000213051	0.00228644
Mmp24	172.08	350.76	261.423	-1.02766	0.346088	-2.96936	0.00298418	0.0204374
Mmrn2	1180.32	2013.1	1596.71	-0.770396	0.215376	-3.57699	0.000347572	0.00345672
Mms22l	155.93	11.98	83.9537	3.68572	0.966285	3.81432	0.000136559	0.00155739
Mnda	1150.58	440.52	795.549	1.3839	0.252976	5.47048	4.48812e-08	1.1898e-06
Mob2	1066.21	2284.68	1675.44	-1.09949	0.214094	-5.13557	2.81296e-07	6.53718e-06
Mob3c	185.93	97.11	141.518	0.937887	0.474243	1.97765	0.047968	0.171366
Mob4	348.02	534.51	441.265	-0.618579	0.2181	-2.83622	0.00456507	0.0287326
Mog	75.33	16.89	46.1077	2.15446	0.668123	3.22465	0.00126128	0.0102205
Mospd3	336.43	223.03	279.732	0.593529	0.25746	2.30533	0.0211483	0.0936207
Mpc1	1428.23	2438.44	1933.33	-0.772	0.31437	-2.4557	0.0140609	0.0689355
Mpc2	379.61	644.09	511.85	-0.763197	0.260187	-2.93327	0.00335414	0.0223964
Mpeg1	1485.27	216.18	850.728	2.77858	0.262791	10.5733	3.96183e-26	1.05728e-23
Mpo	67.49	205.88	136.686	-1.61034	0.648182	-2.48439	0.0129773	0.0648337
Mpp7	241.96	703.71	472.836	-1.54074	0.273945	-5.62427	1.86294e-08	5.34578e-07
Mpped2	295.42	117.25	206.336	1.33631	0.611818	2.18415	0.028951	0.118741
Mpst	284.5	502.13	393.312	-0.819526	0.257773	-3.17926	0.00147654	0.0116179
Mr1	60.11	134.56	97.3378	-1.16022	0.487954	-2.37772	0.0174201	0.0813683
Mrc1	5023.15	1824.67	3423.91	1.46086	0.188854	7.73541	1.03072e-14	8.68628e-13
Mrgprf	649.89	1339.63	994.758	-1.04312	0.327164	-3.18836	0.00143083	0.0113362
Mroh2a	178.33	36.8	107.564	2.27519	0.527567	4.3126	1.61348e-05	0.000244188
Mroh7	36.36	109.89	73.1229	-1.59534	0.648349	-2.46061	0.0138701	0.0682298
Mrpl12	566.89	988.84	777.861	-0.803429	0.272771	-2.94544	0.00322501	0.0217418
Mrpl15	759.15	1510.83	1134.99	-0.993302	0.266575	-3.72616	0.000194419	0.00211627
Mrpl4	333.64	607.61	470.627	-0.864831	0.263638	-3.28038	0.00103669	0.00865006
Mrpl45	332.73	530.37	431.554	-0.674134	0.291598	-2.31186	0.0207853	0.0927319
Mrpl48	402.43	621.66	512.047	-0.628745	0.251952	-2.49549	0.0125782	0.0633541
Mrpl49	143.93	240.11	192.017	-0.739894	0.369944	-2.00002	0.0454985	0.165011
Mrpl58	267.04	438.41	352.727	-0.716078	0.310366	-2.30721	0.0210433	0.0933918
Mrps27	270.69	460.9	365.791	-0.768725	0.325815	-2.35939	0.018305	0.0846376
Mrps35	462.97	770.06	616.517	-0.734336	0.236113	-3.1101	0.00187025	0.0140309
Mrps36	253.89	566.08	409.981	-1.15755	0.350418	-3.30333	0.000955428	0.00809435
Mrps5	504.89	906.09	705.486	-0.844787	0.227182	-3.71854	0.000200378	0.00217375
Mrvi1	8405.7	16638.9	12522.3	-0.985055	0.216989	-4.53965	5.63473e-06	9.74334e-05
Ms4a12	43.02	0	21.5086	7.97055	1.55577	5.12322	3.0036e-07	6.92992e-06
Ms4a4a	234.31	102.5	168.404	1.19501	0.472635	2.5284	0.0114585	0.0592999
Ms4a6a	323	63.23	193.117	2.35755	0.353179	6.67523	2.46846e-11	1.275e-09
Msh5	11.66	0	5.83129	6.08744	2.94108	2.0698	0.038471	0.14608
Msi2	1098.85	1880.57	1489.71	-0.77579	0.190176	-4.07932	4.51676e-05	0.000593779
Msn	27231.1	15660.9	21446	0.798107	0.168127	4.74706	2.06394e-06	3.95781e-05
Msrb1	589.18	924.11	756.644	-0.649492	0.276387	-2.34993	0.0187767	0.0862704
Mt1	381.07	144.06	262.564	1.40168	0.338587	4.13979	3.47617e-05	0.0004725
Mt1m	71.98	4.54	38.2606	3.97831	0.993606	4.00391	6.23033e-05	0.000786131
Mt2A	593.7	59.74	326.717	3.30602	0.319089	10.3608	3.73729e-25	9.20638e-23
Mtbp	128.96	63.56	96.2616	1.02447	0.486294	2.10669	0.0351441	0.13702
Mterf4	116.87	197.48	157.177	-0.757119	0.374366	-2.02241	0.0431345	0.158738
Mtfmt	134.46	225.12	179.788	-0.742189	0.368794	-2.01248	0.0441698	0.161399
Mtfp1	18.71	48.89	33.802	-1.3887	0.673389	-2.06225	0.0391837	0.148242
Mtfr1l	1107.27	1805.01	1456.14	-0.705438	0.252147	-2.79773	0.00514631	0.0316614
Mthfd1l	420.44	98.84	259.636	2.08388	0.380419	5.47786	4.30505e-08	1.14638e-06
Mthfd2	1155.71	4110.93	2633.32	-1.83092	0.151227	-12.1071	9.68668e-34	4.30842e-31
Mturn	275.13	440.44	357.783	-0.678359	0.276583	-2.45264	0.0141814	0.0693561
Mtus2	576.75	2068.17	1322.46	-1.84179	0.29039	-6.34248	2.26102e-10	9.62858e-09
Mul1	313.39	521.9	417.644	-0.735924	0.272359	-2.70204	0.00689154	0.0399892
Mup5	21.81	438.91	230.359	-4.33339	1.42228	-3.0468	0.00231292	0.0166597
Musk	34.31	92.06	63.1881	-1.42481	0.589743	-2.41598	0.015693	0.0749631
Mustn1	476.91	220.08	348.495	1.11635	0.334756	3.33481	0.000853576	0.00740041
Mut	683.13	1307.54	995.335	-0.936818	0.210686	-4.44651	8.72784e-06	0.000142602
Mutyh	109.95	60.54	85.2465	0.860158	0.433972	1.98206	0.0474724	0.170127
Mx1	754.78	291.16	522.967	1.37358	0.492752	2.78756	0.00531058	0.0324574
Mxra7	2325.59	1129.22	1727.4	1.0427	0.170521	6.11478	9.66883e-10	3.67737e-08
Mxra8	5589.7	3505.8	4547.75	0.673264	0.192745	3.49304	0.000477563	0.00453543
Myadml2	0	34.93	17.4644	-7.48754	2.45801	-3.04618	0.0023177	0.0166866
Mybl2	161.9	7.53	84.7149	4.41808	2.08986	2.11405	0.0345107	0.135205
Myc	592.19	290.12	441.159	1.02814	0.212505	4.83821	1.31011e-06	2.62546e-05
Myd88	797.49	431.61	614.55	0.88639	0.200049	4.43085	9.38605e-06	0.000152269
Myg1	166.11	331.53	248.819	-0.996687	0.279518	-3.56574	0.000362835	0.00358846
Myh11	131714	346636	239175	-1.39601	0.266967	-5.22916	1.70283e-07	4.10629e-06
Myh14	225.24	1129.31	677.275	-2.32583	0.942892	-2.4667	0.0136366	0.0674147
Myh3	16.55	0	8.27738	6.59388	2.65959	2.47929	0.0131646	0.0656262
Myh7b	648.93	1009.91	829.419	-0.638009	0.209911	-3.03942	0.00237033	0.0169891
Myl12a	12630.4	7964.68	10297.5	0.665213	0.13917	4.77987	1.75409e-06	3.42102e-05
Myl9	11640	21796.1	16718	-0.904944	0.282063	-3.20831	0.00133517	0.0107269
Mylk	21674.2	48721.8	35198	-1.16856	0.231146	-5.05552	4.2922e-07	9.58532e-06
Mylk2	15.71	64.56	40.1358	-2.04403	0.685308	-2.98264	0.00285776	0.0197235
Mylk4	0	24.17	12.0845	-6.95374	2.47945	-2.80455	0.00503868	0.0311744
Myo18b	1203.65	2383.23	1793.44	-0.98549	0.310551	-3.17337	0.00150683	0.011804
Myo1b	166.54	87.27	126.904	0.931381	0.367487	2.53446	0.0112621	0.0586434
Myo1c	11756.6	7700.52	9728.54	0.610526	0.137201	4.44986	8.59276e-06	0.000140971
Myo1d	8414.78	3634.09	6024.43	1.2116	0.141219	8.57961	9.51947e-18	1.1126e-15
Myo1f	1036.35	365.45	700.898	1.50446	0.263709	5.70499	1.16353e-08	3.47583e-07
Myo1g	176.92	46.97	111.945	1.91067	0.467526	4.08677	4.3743e-05	0.000578375
Myo5a	2453.66	1124.89	1789.27	1.12545	0.163028	6.90344	5.07581e-12	2.87187e-10
Myo5b	41.8	131.61	86.7051	-1.65377	0.826759	-2.00031	0.0454673	0.164972
Myo7a	894.19	201.66	547.927	2.14879	0.399261	5.38192	7.36954e-08	1.90632e-06
Myo7b	21.93	87	54.4608	-1.99057	0.594962	-3.34572	0.000820692	0.00716127
Myof	8339.41	5157.19	6748.3	0.693343	0.112132	6.18326	6.27903e-10	2.49607e-08
Myom1	956.96	3716.08	2336.52	-1.9573	0.788563	-2.4821	0.0130609	0.065192
Myrip	258.45	911.34	584.895	-1.81789	0.228407	-7.95898	1.73461e-15	1.5781e-13
Naaladl2	502.15	898.08	700.115	-0.837995	0.256016	-3.27322	0.0010633	0.00884448
Nab1	1780.52	2863.08	2321.8	-0.685003	0.194526	-3.52139	0.000429296	0.00413343
Nabp1	626.57	229.09	427.831	1.44997	0.316942	4.57488	4.76498e-06	8.41199e-05
Nacc2	1665.89	2835.88	2250.89	-0.76724	0.241684	-3.17456	0.00150065	0.0117708
Nadk2	257.89	393.31	325.601	-0.609283	0.259751	-2.34564	0.0189944	0.0870208
Naga	631.32	348.14	489.732	0.859818	0.201797	4.26081	2.03687e-05	0.000297663
Nagk	565.61	366.68	466.142	0.624841	0.205921	3.03437	0.00241041	0.0171765
Naglu	736.31	356.71	546.508	1.04601	0.254429	4.1112	3.93614e-05	0.000524339
Naip5	265.81	45.42	155.616	2.55634	0.516498	4.94937	7.4455e-07	1.57695e-05
Nans	1103.93	625.26	864.595	0.819131	0.274405	2.98512	0.00283471	0.0195897
Nap1l5	34.56	139.54	87.0476	-2.01282	0.748783	-2.68813	0.00718545	0.0413328
Napepld	151.58	353.14	252.362	-1.22108	0.572783	-2.13183	0.0330208	0.131296
Napsa	86.96	4.45	45.7053	4.32308	1.03948	4.15887	3.1982e-05	0.000439568
Nat8f3	210.46	84.91	147.683	1.31054	0.436204	3.00441	0.00266095	0.0186383
Nat8l	143.47	256.21	199.843	-0.836903	0.27978	-2.99129	0.00277803	0.019298
Nav1	8301.3	5479.55	6890.42	0.599391	0.168251	3.56248	0.000367369	0.00362658
Nav3	410.68	193.08	301.88	1.08712	0.302567	3.59298	0.000326912	0.00327163
Ncald	360.04	634.4	497.221	-0.816722	0.282674	-2.88927	0.00386133	0.0251844
Ncapd2	574.5	278.72	426.61	1.04468	0.240255	4.34819	1.37263e-05	0.000212148
Ncapd3	399.7	264.11	331.906	0.596085	0.26484	2.25074	0.024402	0.104324
Ncapg	251.48	36.97	144.223	2.75771	0.391773	7.03905	1.93561e-12	1.16515e-10
Ncapg2	872.64	310.6	591.62	1.48891	0.213565	6.97168	3.13167e-12	1.81682e-10
Ncaph	127.63	45.53	86.583	1.49037	0.461756	3.22762	0.00124823	0.0101301
Ncf1	330.93	83.64	207.286	1.97896	0.454456	4.35458	1.33323e-05	0.000206656
Ncf2	229.43	56.26	142.846	2.03244	0.437879	4.64156	3.45785e-06	6.29552e-05
Ncf4	296.87	88.1	192.484	1.75154	0.441057	3.97124	7.14999e-05	0.000891632
Nck2	278.21	447.67	362.937	-0.685166	0.294246	-2.32855	0.0198829	0.0898067
Nckap1l	751.88	234.32	493.102	1.68384	0.251518	6.69472	2.16088e-11	1.12338e-09
Ncln	1390.66	925.09	1157.88	0.587294	0.193337	3.03767	0.00238412	0.0170651
Ncr3lg1	62.44	19.66	41.0466	1.65739	0.693412	2.39019	0.0168395	0.0791646
ND1	75880.4	129368	102624	-0.769682	0.227935	-3.37677	0.00073343	0.00652065
ND2	55766	103963	79864.5	-0.898615	0.255599	-3.51572	0.000438567	0.00421003
ND3	3630.24	5481.26	4555.75	-0.594582	0.245438	-2.42253	0.0154128	0.0739999
ND4L	11556.5	18943.8	15250.1	-0.713062	0.2206	-3.23238	0.00122763	0.00998823
ND5	54090.2	93768.4	73929.3	-0.793741	0.212323	-3.73837	0.00018522	0.00203616
ND6	12264.8	23767.9	18016.3	-0.954534	0.231732	-4.11913	3.80305e-05	0.000509578
Ndc80	174.89	26.5	100.696	2.72744	1.06985	2.54936	0.010792	0.0566533
[truncated: 1,397 more rows]
