# Supplementary material for: Transcriptome-Wide N6-Methyladenosine Alternations in Pulmonary Arteries of Monocrotaline-Induced Pulmonary Arterial Hypertension in Rats and Novel Therapeutic Targets
Source: Biomedicines. 2024 Feb 4;12(2):364. doi: 10.3390/biomedicines12020364 (PMC10886831; doi:10.3390/biomedicines12020364)
Supplement: Supplementary file 1 [file biomedicines-12-00364-s001.zip › Supplement Table S3.xlsx]

## Sheet: Supplement Table S3
gene	m_FC	m_FDR	m_sig	g_FC	g_FDR	col
Aff4	1.9	-46.9	yes	-0.0257875	0.845847	grey
Aimp1	-0.992	-88.3	yes	-0.163508	0.292424	grey
Anapc15	1.33	-62.6	yes	0.181671	0.521457	grey
Angpt2	-1.18	-94.6	yes	-1.51401	4.37e-14	steelblue
Arhgap25	2.47	-96.2	yes	1.53466	1.49e-07	red
Arhgap29	1.34	-19.7	yes	0.123195	0.334286	grey
Arhgap35	1.73	-16	yes	-0.0954056	0.421388	grey
Arhgap5	0.863	-182	yes	-0.110566	0.410751	grey
Armc7	3.18	-44.4	yes	0.357891	0.438115	grey
Arpp19	-0.94	#NAME?	yes	-0.425941	0.00274144	grey
Atg13	-0.623	-110	yes	-0.15576	0.399874	grey
Atg3	0.595	#NAME?	yes	0.278654	0.163944	grey
B2m	0.638	-181	yes	0.35049	0.012196	grey
B3gnt9	2.82	-30.3	yes	0.624594	0.0104744	red
Bag1	1.13	-97.2	yes	0.407169	0.0139822	grey
Baz2b	1.23	-79.5	yes	0.0143816	0.913676	grey
Bdp1	-0.894	-29.6	yes	-0.0427796	0.669806	grey
Bhlhe41	1.85	-48.4	yes	1.11941	0.000185279	red
Brf1	1.3	-72.5	yes	-0.0707735	0.685787	grey
Bud31	1.36	-139	yes	0.123442	0.670025	grey
C1qb	2.15	-92.3	yes	2.03382	2.6e-23	red
Cadm3	-0.825	-123	yes	-0.256231	0.0419034	grey
Camsap2	-0.79	-295	yes	0.0656774	0.55121	grey
Casc4	0.842	-31.6	yes	0.101313	0.508303	grey
Casp3	1.48	-62.3	yes	1.14801	2.95e-08	red
Cd163	2.76	-19.4	yes	1.3749	2.03e-13	red
Cd200	0.823	-200	yes	2.08596	3.41e-37	red
Cd3eap	1.25	#NAME?	yes	1.04758	0.00014385	red
Cdca8	2.42	-41.9	yes	1.22768	0.00363391	red
Cenpe	3.01	-36	yes	1.65211	3.07e-12	red
Cenpf	5.06	-6.91	yes	2.46979	8.66e-39	red
Cep250	-1.96	-67.8	yes	-0.301424	0.0477416	grey
Cep290	2.18	-17.8	yes	-0.132016	0.436623	grey
Cep83	0.773	-190	yes	-0.330386	0.0563786	grey
Chd2	-1.24	-97.3	yes	-0.363301	0.0362062	grey
Chmp3	0.619	#NAME?	yes	-0.205871	0.118249	grey
Chmp4b	-0.635	#NAME?	yes	-0.0925952	0.571802	grey
Cnot3	-0.969	-50.9	yes	0.131748	0.428758	grey
Cntrob	2.99	-16.4	yes	-0.0214152	0.958959	grey
Col15a1	3.52	-17	yes	0.63603	0.323359	grey
Col5a2	0.73	#NAME?	yes	1.38336	5.3e-29	red
Colgalt1	0.942	-217	yes	0.898931	1.98e-10	red
Commd1	0.68	-173	yes	-0.309765	0.0498485	grey
Cops2	1.08	-179	yes	-0.308224	0.0456443	grey
Creb3l1	-1.6	-23.7	yes	-0.419101	0.00834262	grey
Crybg3	-1.26	-119	yes	-0.143066	0.463254	grey
Csgalnact1	1.17	-86.8	yes	1.22169	2.31e-06	red
Csnk1g3	1.41	-94.1	yes	-0.139548	0.415086	grey
Cul3	1.71	-24.8	yes	-0.129441	0.450746	grey
Cxxc5	1.53	-57.9	yes	-0.444061	0.0404342	grey
Dag1	0.846	-164	yes	0.556946	1.42e-08	grey
Ddit4	0.911	-208	yes	-0.205511	0.347589	grey
Ddx3x	0.9	-273	yes	0.0691883	0.665635	grey
Dnajc18	-1.5	-22.9	yes	-0.457631	0.0389321	grey
Dnajc2	1.24	-42.9	yes	-0.148591	0.338385	grey
Dnase2	1.49	-55	yes	0.423442	0.161997	grey
Dpm1	-2.19	-11.7	yes	0.0928545	0.691323	grey
Dst	1.03	-74	yes	0.23307	0.0663407	grey
Dync1i2	0.631	#NAME?	yes	-0.0308346	0.828569	grey
Dzip1	-2.09	-39.7	yes	-0.325312	0.152619	grey
Eed	0.844	#NAME?	yes	-0.0312949	0.916943	grey
Ehbp1l1	-0.604	-143	yes	-0.0251204	0.814995	grey
Ep300	1.29	-134	yes	-0.0360964	0.781334	grey
Epsti1	3.07	-4.86	yes	2.09564	1.22e-06	red
Eva1a	4.24	-14	yes	1.18451	0.0203786	red
Ext1	1.17	#NAME?	yes	0.718993	4.74e-08	red
Extl3	2.27	-84.2	yes	0.309698	0.0978582	grey
Fat1	1.63	-121	yes	0.855409	1.59e-10	red
Fbf1	1.29	-58	yes	0.0572094	0.731752	grey
Fn1	1.32	#NAME?	yes	2.95056	6.68e-51	red
Foxj2	1.31	-23.8	yes	-0.272594	0.0806747	grey
Foxp1	2.14	-48.5	yes	0.573997	2.37e-05	grey
Foxp1	0.791	#NAME?	yes	0.573997	2.37e-05	grey
Frg1l1	-1.74	-237	yes	1.13171	0.0528026	grey
Ganab	-1.21	-271	yes	0.297479	0.00593476	grey
Gatad2a	1.17	-146	yes	0.308717	0.0355488	grey
Golgb1	0.764	-207	yes	0.136694	0.233962	grey
Gripap1	1.56	-27.6	yes	-0.210997	0.146385	grey
Gtf2e2	2.05	-25.5	yes	0.0636226	0.736866	grey
Gypc	1.19	-109	yes	-0.679914	2.86e-05	orange
Hectd1	0.686	-51.1	yes	-0.298109	0.00968856	grey
Hmgn3	0.897	-16.7	yes	0.376656	0.0891434	grey
Hpcal1	1.78	-50.3	yes	-0.0563578	0.766698	grey
Hras	1.22	-83.9	yes	0.124741	0.462938	grey
Idh1	1.05	-142	yes	0.256786	0.169727	grey
Ifnlr1	1.92	-51.7	yes	1.17976	0.000609216	red
Ikbkb	1.27	-159	yes	0.161135	0.290178	grey
Ino80	2.47	-5.25	yes	0.264244	0.092569	grey
Ints3	-1.08	-156	yes	-0.379137	0.0171574	grey
Iscu	0.587	-164	yes	-0.564168	0.000313435	grey
Kazald1	2.06	-13.1	yes	1.21671	8.15e-07	red
Kdm5a	0.803	-108	yes	-0.0218785	0.865378	grey
Kdr	2.94	-12.3	yes	1.00454	0.000710425	red
Kidins220	-1.19	-28.3	yes	-0.292227	0.0481934	grey
Kpna1	1.04	-42.1	yes	-0.251858	0.0925667	grey
Krcc1	0.703	#NAME?	yes	-0.114803	0.407999	grey
Lats2	1.05	-247	yes	0.120232	0.341152	grey
LOC500584	3.26	-9.9	yes	-0.0661987	0.786729	grey
LOC679894	2.28	-28.7	yes	1.7406	1.67e-19	red
LOC679894	3.09	-31.8	yes	1.7406	1.67e-19	red
LOC679894	3.5	-20.9	yes	1.7406	1.67e-19	red
LOC679894	1.97	-58.8	yes	1.7406	1.67e-19	red
LOC688869	-1.25	-53.8	yes	-0.724685	0.00312372	steelblue
Loxl1	0.752	-279	yes	0.309837	0.0619637	grey
Lrrc19	1.71	-108	yes	-0.344394	0.781341	grey
Lrrc8a	-2.49	-23.9	yes	0.378577	0.0193648	grey
Lrrc8a	1.14	-34.8	yes	0.378577	0.0193648	grey
Macf1	0.72	-136	yes	-0.27978	0.0049822	grey
Map1a	1.53	-48.3	yes	0.209289	0.186686	grey
Mga	1.12	-41.2	yes	-0.348774	0.00634567	grey
Mki67	2.05	-29.8	yes	2.39001	2.24e-45	red
Mki67	1.39	-311	yes	2.39001	2.24e-45	red
Mkks	2.51	-17.1	yes	-0.256686	0.262801	grey
Mlx	1.32	-22.5	yes	-0.0982181	0.638429	grey
Mpeg1	4.33	-72.2	yes	2.77858	3.96e-26	red
Mphosph6	1.23	-180	yes	-0.378904	0.0505134	grey
Mrps17	1.77	-14.5	yes	-0.189802	0.33267	grey
Myc	1.78	-25.8	yes	1.02814	1.31e-06	red
Mycbp2	1.35	-59.1	yes	0.322446	0.0106047	grey
Myh9	2.56	-85.1	yes	-0.249035	0.274011	grey
Mysm1	1.39	-29	yes	-0.109798	0.553359	grey
Nbea	-2.32	-22.4	yes	-0.45516	0.000182681	grey
Nbr1	0.679	-38.1	yes	-0.272295	0.0201962	grey
Ncoa2	1.91	-12.8	yes	-0.233701	0.246026	grey
Ndel1	0.629	-293	yes	0.136946	0.352917	grey
Nelfe	-0.873	-320	yes	0.517954	0.0309546	grey
Nf1	2.04	-8.44	yes	-0.170685	0.182571	grey
Nsd1	1.08	-30.6	yes	0.049507	0.710966	grey
Nynrin	2.02	-5.75	yes	0.329474	0.0725521	grey
Ogt	1.11	-60.2	yes	-0.0484412	0.786244	grey
Optn	-1.64	-67.5	yes	-0.197727	0.446202	grey
Parp14	0.956	-69.7	yes	0.819448	0.000306902	red
Parp9	1.93	-18	yes	0.226285	0.30449	grey
Pcnp	-0.744	#NAME?	yes	-0.0479172	0.714667	grey
Peak1	1.43	-48.8	yes	1.02742	4.62e-11	red
Peak1	1.87	-26.3	yes	1.02742	4.62e-11	red
Per2	2.29	-17.2	yes	0.394277	0.0537926	grey
Pgrmc2	0.765	#NAME?	yes	-0.205927	0.354473	grey
Phactr4	1.52	-11	yes	-0.0701945	0.703727	grey
Plec	0.587	-161	yes	0.920682	5.16e-20	red
Plec	0.711	-142	yes	0.920682	5.16e-20	red
Plekho1	1.08	-49.8	yes	0.267463	0.120368	grey
Pmfbp1	1.81	-91	yes	2.10352	2.64e-06	red
Pnrc2	0.601	#NAME?	yes	-0.0196854	0.900961	grey
Postn	0.66	#NAME?	yes	4.50301	1.82e-190	red
Postn	1.74	#NAME?	yes	4.50301	1.82e-190	red
Ppfia1	0.84	-64.6	yes	0.0958775	0.578587	grey
Ppp1cc	-1.64	-9.23	yes	-0.142213	0.343124	grey
Ppp1r18	-2.09	-130	yes	0.82298	4.1e-10	turquoise
Ppp2r2d	2.36	-26.2	yes	-0.0846603	0.751114	grey
Pqbp1	-0.802	#NAME?	yes	-0.356587	0.03962	grey
Prrc2c	-1.23	-41.7	yes	0.11262	0.379198	grey
Qrich2	1.74	-65.6	yes	0.809071	0.121567	grey
Rab11fip2	1.78	-18.1	yes	-0.175428	0.456142	grey
Rab8b	1.09	-27.6	yes	-0.0382809	0.859756	grey
Rassf9	1.35	-169	yes	-0.297358	0.242076	grey
Rbm15	1.11	-81.7	yes	-0.00346036	0.982906	grey
Rbms3	1.52	-199	yes	-0.094574	0.529003	grey
Rcan3	1.56	-74.8	yes	0.54752	0.101444	grey
RGD1565775	2.24	-6.73	yes	-0.0836975	0.6072	grey
Rgs3	1.49	-42	yes	0.284292	0.0784304	grey
Rgs3	1.11	-84.1	yes	0.284292	0.0784304	grey
Rictor	1.34	-20.6	yes	-0.0752423	0.656756	grey
Rock1	0.888	-254	yes	0.164952	0.322895	grey
Rrbp1	0.624	#NAME?	yes	0.616988	1.14e-08	red
S100a4	0.611	-275	yes	0.942361	6.03e-06	red
Safb2	-0.839	-254	yes	-0.196758	0.185402	grey
Sdf2	1.37	-85.5	yes	0.330273	0.173512	grey
Sdhaf2	1.1	-99.2	yes	-0.461883	0.0200378	grey
Secisbp2l	1.5	-34	yes	-0.289609	0.0268323	grey
Sertad4	1.6	-28.8	yes	0.524422	0.0146488	grey
Slc37a3	1.05	-152	yes	0.266484	0.147689	grey
Slc44a1	2.3	-28.6	yes	1.09617	1.21e-08	red
Slc9a9	2.17	-51.6	yes	0.752603	0.0017884	red
Slfn2	1.85	-57.2	yes	0.962846	0.000165522	red
Smim3	-1.06	-117	yes	-0.681435	0.00597454	steelblue
Snap29	2.21	-7.71	yes	-0.106042	0.481114	grey
Sort1	-1.81	-10.6	yes	-0.645267	3.47e-05	steelblue
Spag9	1.29	-49.3	yes	0.263707	0.00935987	grey
Spg20	1.68	-48	yes	-0.414761	0.00411711	grey
Spg20	-1.18	-26.4	yes	-0.414761	0.00411711	grey
Ssr1	-0.73	-209	yes	0.152213	0.232377	grey
St3gal2	1.15	-217	yes	-0.192671	0.189106	grey
Stard9	2.77	-18.1	yes	0.0980716	0.575075	grey
Stx4	1.16	-49.2	yes	-0.200194	0.218999	grey
Sulf1	1.59	-140	yes	2.05547	9.32e-21	red
Syn3	-0.668	-120	yes	-0.866528	0.637629	grey
Szrd1	-0.757	-241	yes	0.286585	0.0437997	grey
Tardbp	2.46	-24.6	yes	-0.0586054	0.674514	grey
Tcf4	0.753	-96.5	yes	0.127768	0.439977	grey
Tln2	0.977	-146	yes	-0.461983	0.0490483	grey
Tm2d2	0.931	-107	yes	-0.237203	0.241953	grey
Tmf1	1.1	-193	yes	0.10681	0.339216	grey
Tpp2	4.44	-4.67	yes	0.0984084	0.503241	grey
Trip11	1.6	-34	yes	-0.32473	0.00826364	grey
Trps1	1.04	-55.8	yes	0.640992	2.98e-05	red
Tspan5	-1.67	-33	yes	-0.426487	0.11028	grey
Ttc3	2.4	-15.2	yes	0.0588531	0.563636	grey
Tubb2a	1.67	-46.6	yes	-0.6005	0.107726	grey
Uba2	-1.52	-6.35	yes	0.230057	0.198971	grey
Ugp2	-1.19	-29	yes	-0.0995274	0.517038	grey
Usp16	0.841	#NAME?	yes	0.0185113	0.898293	grey
Vcan	1.57	-219	yes	1.09959	1.96e-08	red
Vcpip1	1.53	-31	yes	0.110473	0.488856	grey
Vps37a	-1.81	-14.7	yes	0.00720073	0.976294	grey
Zbed6	1.64	-91.9	yes	0.111916	0.35713	grey
Zc3h13	0.715	-129	yes	0.0369409	0.75315	grey
Zcchc7	1.27	-110	yes	0.0233623	0.878361	grey
Zdhhc5	2.21	-13.7	yes	0.37245	0.00409611	grey
Zeb1	0.792	-38.2	yes	-0.300866	0.0502929	grey
Zfp318	0.86	-120	yes	0.0738975	0.704542	grey
Zfp407	2.83	-25.6	yes	0.0592938	0.747071	grey
Zfp608	2.46	-26	yes	0.170909	0.276218	grey
Zfpm1	0.935	-41.2	yes	0.386208	0.116877	grey
Zzz3	0.989	-40.6	yes	0.022998	0.883732	grey
A3galt2	1	-69.3	no	0.350705	0.109164	grey
Aaed1	-0.305	-62.4	no	0.760416	1.41e-05	grey
Aak1	1.97	-9.54	no	-0.00880802	0.962457	grey
Aamp	0.346	#NAME?	no	-0.226313	0.137166	grey
Aar2	-1.46	-10.1	no	-0.160269	0.498914	grey
Aars2	1.1	-4.7	no	-0.267282	0.346338	grey
Aatf	0.44	-60	no	0.584251	0.000505882	grey
Abca1	1.23	-32.7	no	1.19951	1.66e-07	grey
Abca3	0.594	-8.09	no	0.167086	0.309574	grey
Abca8a	-0.101	-124	no	-1.06398	8.49e-07	grey
Abcb10	-1.06	-4.75	no	0.0352433	0.899422	grey
Abcc1	0.0534	-8.12	no	-0.187682	0.302304	grey
Abcc5	1.07	-29.6	no	0.125646	0.593869	grey
Abcc9	-0.178	#NAME?	no	-0.671049	0.0096654	grey
Abcd2	1.03	-3.08	no	-0.724117	0.0197571	grey
Abcd3	0.116	-15.1	no	-0.728933	2.02e-06	grey
Abce1	0.308	-166	no	0.0756224	0.6547	grey
Abcf1	-0.00652	#NAME?	no	-0.0700454	0.662948	grey
Abcf2	0.374	-114	no	-0.0332371	0.823888	grey
Abcf3	0.472	-5.69	no	-0.227314	0.181188	grey
Abhd13	1.24	-25.5	no	-0.119864	0.657688	grey
Abhd15	0.935	-15.8	no	0.123703	0.743464	grey
Abhd17b	1.94	-8.54	no	-0.0677434	0.805214	grey
Abhd4	-0.615	-28.8	no	0.107517	0.453977	grey
Abhd5	0.282	-5.43	no	0.0355681	0.859617	grey
Abhd6	0.408	-35	no	0.55107	0.0155376	grey
Abi1	0.166	-24.2	no	0.0457034	0.802931	grey
Abi3	0.488	-3.71	no	0.806295	0.112189	grey
Abl1	-1.11	-2.69	no	-0.484703	0.190174	grey
Abl2	2.46	-2.5	no	1.09441	6.13e-08	grey
Ablim1	0.749	-122	no	-0.656405	0.00552576	grey
Ablim3	-0.285	-31.3	no	-0.630158	2.27e-05	grey
Abr	-0.318	-4.96	no	-0.16622	0.252956	grey
Abtb2	1.63	-8.67	no	0.653768	0.0455987	grey
Acad11	-0.722	-5.67	no	-0.133474	0.630651	grey
Acad9	1.65	-7.62	no	-0.353881	0.203889	grey
Acadl	0.162	-43.2	no	-1.23845	8.34e-05	grey
Acadm	0.0619	-56	no	-0.922603	0.0017043	grey
Acads	-0.248	-3.86	no	-0.716969	0.0520582	grey
Acadsb	-2.2	-2.5	no	-1.39235	9.85e-12	grey
Acap2	-0.0521	-137	no	0.0590611	0.670359	grey
Acat1	0.565	-83.1	no	-1.08262	0.00137992	grey
Acbd3	0.844	-275	no	0.166525	0.407544	grey
Acbd5	0.309	#NAME?	no	0.0668547	0.731151	grey
Acbd6	-0.435	-10.4	no	-0.114461	0.610559	grey
Ace	0.339	-26.5	no	0.451032	0.0108861	grey
Acer3	1.85	-2.32	no	0.575793	0.0128908	grey
Acin1	-0.0285	#NAME?	no	-0.260368	0.0153529	grey
Ackr3	-0.0864	-73.7	no	-0.606572	0.00581388	grey
Acot13	-0.109	-9.52	no	-1.97086	1.43e-05	grey
Acp2	0.22	-25.5	no	0.541281	0.0253122	grey
Acrbp	-0.579	-11.4	no	-0.0152006	0.98433	grey
Acsl1	0.246	-226	no	-1.15522	5.48e-05	grey
Acta2	-0.249	-15.6	no	-0.907034	0.00172467	grey
Actn1	0.199	#NAME?	no	-0.397856	0.0315618	grey
Actn4	1.12	-46.3	no	0.667419	1.85e-06	grey
Actr1a	-0.827	-11.6	no	-0.00871033	0.942997	grey
Actr1b	-0.73	-11.2	no	-0.0175018	0.909024	grey
Actr2	0.0977	-22.4	no	0.591018	1.42e-06	grey
Actr3	-0.057	-139	no	0.330063	0.0140751	grey
Actr8	0.548	-35.6	no	-0.581226	0.00717258	grey
Acvr1	-2.7	-4.11	no	0.109113	0.550741	grey
Acvr2a	0.11	-25.5	no	-0.373321	0.0723432	grey
Acvr2b	1.12	-3.58	no	-0.031785	0.945756	grey
Acvrl1	0.313	-164	no	0.110196	0.370817	grey
Acy1	-0.0756	-10.1	no	-0.573142	0.157147	grey
Adam10	1.46	-127	no	0.0561161	0.777963	grey
Adam12	0.757	-6.11	no	3.0671	1.62e-59	grey
Adam17	1.43	-17.3	no	0.26831	0.0300384	grey
Adam23	-1.11	-3.8	no	0.670207	0.00982282	grey
Adam8	-1.34	-6.45	no	0.794106	0.183436	grey
Adamts1	-0.0451	-237	no	-0.209365	0.419438	grey
Adamts10	-0.0998	-105	no	-0.700272	3.68e-07	grey
Adamts15	-1.49	-9.16	no	-1.49178	4.67e-07	grey
Adamts19	-1.29	-5.56	no	-1.9818	0.0242048	grey
Adamts2	-0.0602	-29.3	no	-0.160626	0.312116	grey
Adamts5	0.694	-71.2	no	0.0574131	0.855836	grey
Adamts6	1.13	-26	no	1.3644	4.74e-19	grey
Adamts8	0.515	-155	no	-0.45465	0.0868178	grey
Adamts9	0.114	-104	no	-0.17349	0.293525	grey
Adar	0.748	-6.6	no	-0.018937	0.919767	grey
Adarb1	0.27	-21.9	no	-0.463822	0.00146295	grey
Adcy5	0.178	-90.9	no	-0.709128	0.000119513	grey
Adcy6	-0.396	-112	no	-0.487595	0.00138054	grey
Adcy9	0.832	#NAME?	no	-0.444225	0.0244118	grey
Add1	0.376	-51.5	no	0.0561146	0.663698	grey
Add3	0.18	-25.1	no	-0.169243	0.225326	grey
Adgra2	-1.23	-16.5	no	0.303693	0.133196	grey
Adgre5	-0.707	-3.04	no	-0.376306	0.106702	grey
Adgrf5	0.35	-21	no	-0.426374	0.143934	grey
Adgrg6	-0.778	-16.1	no	-0.0648414	0.7732	grey
Adgrl1	-0.625	-11.7	no	-0.226596	0.311207	grey
Adgrl2	0.0641	-4.33	no	-0.0385494	0.783704	grey
Adh1	0.924	-26.2	no	-2.74271	2.99e-23	grey
Adipoq	0.383	#NAME?	no	-0.628552	0.00625367	grey
Adipor2	0.653	-85.9	no	0.0419189	0.766224	grey
Adnp	0.433	#NAME?	no	-0.14652	0.321887	grey
Adnp2	1.24	-110	no	-0.107436	0.714358	grey
Adprhl1	-0.523	-50.7	no	-1.2707	0.472667	grey
Adra1d	-0.128	#NAME?	no	-1.14794	0.00036778	grey
Adrb2	-1.08	-4.3	no	0.444265	0.319913	grey
Adrb3	1.26	-5.82	no	0.116136	0.816812	grey
Adsl	0.591	#NAME?	no	-0.564639	0.0325824	grey
Adss	1.39	-27.1	no	0.432794	0.0439338	grey
Adssl1	-1.06	-6.06	no	-2.0353	0.0224017	grey
Aebp1	0.106	#NAME?	no	-0.798208	1.58e-06	grey
Aebp2	0.236	-98.9	no	0.0300842	0.879529	grey
Aen	-0.308	-5.44	no	0.77772	0.047363	grey
Aes	-0.823	-4.3	no	-0.708188	0.00135412	grey
Afap1	0.132	#NAME?	no	-0.235079	0.222716	grey
Afap1l1	-0.63	-13.2	no	-0.243205	0.368888	grey
Afap1l2	-0.56	-67.4	no	0.266683	0.286777	grey
Afdn	0.0545	#NAME?	no	-0.475153	0.00456118	grey
Aff1	0.825	-3.7	no	-0.14802	0.308745	grey
Aff3	-0.339	-11.6	no	0.125781	0.421873	grey
Aff4	-0.526	-104	no	-0.0257875	0.845847	grey
Afg3l1	1.14	-23.7	no	0.485261	0.0332131	grey
Afg3l2	-0.422	-51.9	no	-0.384562	0.0669021	grey
Aftph	0.771	-85.2	no	-0.117462	0.572112	grey
Agap1	-0.346	-11.3	no	-0.207753	0.132616	grey
Agap2	-0.263	-2.79	no	0.218211	0.706128	grey
Agap3	1.33	-33.7	no	0.39078	0.00759981	grey
Agbl5	0.638	#NAME?	no	-0.0217782	0.963932	grey
Aggf1	0.301	-83.8	no	0.0753069	0.696809	grey
Agl	0.0851	-46.5	no	-0.748534	0.00819279	grey
Agpat3	1.26	-21.8	no	-0.691605	0.000891977	grey
Agpat4	3.46	-2.39	no	-0.417031	0.158525	grey
Agpat5	-0.939	-6.82	no	-0.114361	0.642539	grey
Agt	1.6	-10.7	no	-0.466922	0.207793	grey
Agtpbp1	-0.304	-35.3	no	-0.519384	0.000123872	grey
Ahctf1	0.601	-272	no	0.200541	0.125165	grey
Ahcyl1	-0.799	-34.6	no	-0.264372	0.131466	grey
Ahdc1	-0.804	-51.8	no	-0.514553	2.14e-05	grey
Ahi1	0.282	-227	no	-0.0155248	0.939022	grey
Ahnak	-0.0445	#NAME?	no	-0.258158	0.0577401	grey
Ahnak2	1.55	-53.7	no	0.904356	8.21e-06	grey
Ahsa1	-0.311	-72.2	no	-0.442407	0.0131719	grey
Ahsa2	0.556	-75.3	no	-0.155679	0.469683	grey
Aida	-0.39	-54.2	no	0.695889	6.42e-06	grey
Aifm2	-1.28	-3.14	no	-0.563654	0.0576865	grey
Aig1	0.068	-9.05	no	0.29853	0.13401	grey
Ajuba	1.86	-6.41	no	0.532058	0.0409267	grey
Ak2	0.871	-13.7	no	-0.282584	0.326645	grey
Ak6	0.166	-10.6	no	-0.209499	0.460644	grey
Akap1	0.212	#NAME?	no	-0.98103	4.14e-09	grey
Akap11	0.709	-55.2	no	-0.409448	0.00180066	grey
Akap12	-0.0978	-31.8	no	-0.525335	0.00980607	grey
Akap13	-0.0482	-80.2	no	0.273107	0.0254747	grey
Akap17a	0.185	#NAME?	no	-0.249367	0.0916567	grey
Akap17b	0.0421	-98.1	no	-1.25674	3.86e-08	grey
Akap2	0.35	-108	no	0.0740271	0.587291	grey
Akap6	0.0594	-62.9	no	-0.672734	0.0101814	grey
Akap8	0.249	-172	no	-0.0364996	0.816166	grey
Akap8l	-0.368	#NAME?	no	-0.426709	0.060219	grey
Akap9	0.542	-92.7	no	-0.0288317	0.805358	grey
Akirin1	2.13	-10.1	no	-0.164487	0.506315	grey
Akirin2	-1.53	-6.43	no	-0.121058	0.579697	grey
Akna	2.16	-8.76	no	0.808328	0.00154584	grey
Akr1a1	0.425	-79	no	0.0438541	0.761276	grey
Akt3	-0.526	-5.89	no	0.255084	0.181712	grey
Alcam	-0.372	-21.8	no	-1.17781	2.78e-10	grey
Aldh1a2	0.38	-45.7	no	1.95243	1.06e-09	grey
Aldh1a3	-0.23	-17.6	no	1.53474	2.76e-07	grey
Aldh2	-0.514	-138	no	-0.909351	4.5e-07	grey
Aldh3a2	-1.58	-10.4	no	-0.362713	0.034132	grey
Aldh7a1	-1.47	-4.4	no	0.0752477	0.771201	grey
Alg11	1.28	-2.91	no	-0.222163	0.373972	grey
Alkbh1	0.126	-4.76	no	0.0705213	0.725231	grey
Alms1	0.467	-83.7	no	-0.100729	0.483016	grey
Alpk1	-0.908	-85.9	no	-0.113448	0.62141	grey
Als2	-2.61	-3.32	no	0.178121	0.33064	grey
Alyref	-0.58	-25.8	no	-0.0533811	0.767307	grey
Amacr	0.415	-4.34	no	-0.251851	0.617406	grey
Amd1	1.32	-4.98	no	-0.257324	0.247569	grey
Amer1	1.32	-47.2	no	-0.352599	0.164804	grey
Amigo2	-0.0669	-16.5	no	-1.02632	0.0315534	grey
Ammecr1l	1.29	-3.57	no	0.241417	0.274125	grey
Amot	-0.392	-5.42	no	-0.371783	0.146857	grey
Amotl1	0.072	-133	no	-0.581725	6.56e-06	grey
Amotl2	-0.473	-118	no	-0.117509	0.352641	grey
Anapc1	1.52	-7.56	no	-0.166157	0.297245	grey
Anapc10	0.553	-7.83	no	0.0812879	0.781657	grey
Anapc4	2.1	-16.9	no	-0.238401	0.264065	grey
Anapc7	0.681	-18.2	no	-0.542385	0.00945779	grey
Angpt1	1.58	-6.36	no	-0.669556	0.00885781	grey
Angpt2	0.485	-69.1	no	-1.51401	4.37e-14	grey
Angptl1	0.453	-62.9	no	-1.72292	3e-08	grey
Angptl2	0.122	-189	no	0.507295	0.00355577	grey
Angptl4	-0.471	-17.4	no	-0.811597	0.0284885	grey
Ank2	-0.167	-21.1	no	-0.647736	0.000775421	grey
Ank3	2.87	-3.09	no	-1.13539	0.0310686	grey
Ankef1	0.833	-9.8	no	-0.31884	0.314147	grey
Ankhd1	0.472	-236	no	-0.132059	0.255244	grey
Ankib1	-0.166	-7.14	no	-0.176069	0.271399	grey
Ankle2	0.684	-108	no	-0.0091978	0.947396	grey
Ankmy2	-0.47	-40.1	no	-0.64393	4.97e-05	grey
Ankrd10	0.762	-18	no	-0.435908	0.00853351	grey
Ankrd11	1.48	-16.8	no	0.106101	0.459182	grey
Ankrd12	-1.85	-34.2	no	0.304519	0.0278499	grey
Ankrd13a	-0.843	-40.5	no	0.234005	0.0396944	grey
Ankrd17	0.0893	-293	no	0.0386433	0.715807	grey
Ankrd26	-0.71	-3	no	-0.404079	0.168654	grey
Ankrd28	0.886	-66	no	0.551347	0.00839743	grey
Ankrd33b	-0.232	-9.49	no	-1.55768	0.00202777	grey
Ankrd40	0.0974	#NAME?	no	-0.253752	0.0992688	grey
Ankrd42	2.17	-4.07	no	0.487468	0.0655744	grey
Ankrd49	0.597	-3.62	no	0.223061	0.392527	grey
Ankrd50	0.84	-6.93	no	-0.380125	0.0596852	grey
Ankrd6	0.976	-6.93	no	0.641218	0.122048	grey
Ankrd63	0.637	-5.2	no	1.43776	1.09e-06	grey
Anks1a	-1.38	-4	no	0.0900468	0.705528	grey
Ankzf1	0.0942	-8.43	no	0.0445263	0.805176	grey
Anln	2.52	-12.9	no	1.69	9.9e-10	grey
Ano1	0.186	-68.8	no	1.61819	1.68e-10	grey
Ano2	-0.918	-14.2	no	-1.69566	0.00897319	grey
Ano6	-3.03	-6.26	no	-0.212563	0.212671	grey
Ano8	-0.482	-154	no	-0.0787385	0.725363	grey
Anp32a	-0.801	-11.3	no	-0.802604	0.395075	grey
Anp32b	-0.0848	-22.8	no	0.331716	0.00314575	grey
Anp32e	-0.0619	-235	no	-0.735295	5.11e-09	grey
Antxr1	0.132	#NAME?	no	0.518111	0.0169778	grey
Antxr2	0.122	-65.2	no	0.132812	0.475288	grey
Anxa1	-0.142	-155	no	0.32545	0.0729991	grey
Anxa2	-0.0453	-232	no	0.622358	0.00011898	grey
Anxa3	-0.176	-10.4	no	-1.26353	0.000182752	grey
Anxa5	-0.356	-236	no	-0.344114	0.0289938	grey
Anxa6	-0.378	-71.1	no	-0.658072	8.19e-07	grey
Ap1ar	-0.0912	#NAME?	no	0.179388	0.360053	grey
Ap2a1	-0.578	-47.5	no	0.112694	0.411262	grey
Ap3b1	-0.132	-130	no	0.151392	0.227354	grey
Ap3d1	-0.0707	#NAME?	no	0.125002	0.308546	grey
Ap3s1	-0.104	-24	no	0.722435	0.00200639	grey
Ap4e1	1.27	-21.5	no	-0.00614874	0.982464	grey
Ap4s1	0.386	-269	no	-0.626742	0.117572	grey
Ap5b1	0.138	-2.97	no	0.0674186	0.821013	grey
Ap5z1	1.21	-3.43	no	0.534647	0.150824	grey
Apba2	1	-3.58	no	-0.423859	0.884138	grey
Apbb1	-0.669	-4.66	no	-0.36156	0.0515715	grey
Apbb1ip	1.2	-19.7	no	1.02329	2.74e-06	grey
Apbb2	0.45	-42.4	no	0.1483	0.433656	grey
Apc	1.71	-9.08	no	-0.0522464	0.657484	grey
Apex1	0.185	-6.16	no	0.39993	0.180179	grey
Aph1a	0.364	-8.51	no	0.60401	0.00361161	grey
Api5	0.324	-35.3	no	0.020937	0.884302	grey
Aplf	0.157	-16.8	no	0.498968	0.141053	grey
Aplnr	-0.0125	-60.3	no	1.80522	9.99e-08	grey
Aplp1	-0.14	-7.89	no	0.201909	0.597421	grey
Aplp2	0.234	-54.4	no	-0.0275365	0.77111	grey
Apobr	0.0589	-8.87	no	1.32578	0.000454674	grey
Apoe	-0.282	#NAME?	no	1.40874	2.72e-09	grey
Apol11a	-0.884	-41.3	no	-1.55461	3.51e-05	grey
Apol3	0.937	-9	no	0.0473824	0.871853	grey
Apol9a	0.0253	-232	no	-0.609969	0.0510096	grey
Apold1	1.45	-6.3	no	0.322658	0.177171	grey
Apool	0.784	-4.12	no	-0.77622	0.0440686	grey
App	-0.514	-179	no	0.113359	0.280338	grey
Appl1	-0.248	#NAME?	no	-0.102012	0.429303	grey
Aptx	-0.46	-75.6	no	-0.084417	0.739197	grey
Aqp1	-0.716	#NAME?	no	1.15979	4.45e-09	grey
Arap1	0.582	-61.5	no	0.587789	0.00171179	grey
Arap3	3.29	-6.88	no	0.422482	0.114494	grey
Arcn1	1.08	-8.45	no	-0.0158126	0.911518	grey
Arel1	0.461	-22.7	no	0.113503	0.537284	grey
Arf3	-0.0651	-13.4	no	0.740113	0.0293508	grey
Arf6	0.362	-187	no	0.446948	0.0198423	grey
Arfgap1	-0.168	-85.3	no	0.297483	0.149703	grey
Arfgap3	-0.747	-15.4	no	0.191622	0.283132	grey
Arfgef1	-0.437	-87.6	no	-0.156435	0.421114	grey
Arfgef2	-0.654	-69.9	no	-0.268647	0.0434043	grey
Arfip1	-0.734	-12	no	0.206463	0.32241	grey
Arglu1	-0.0238	#NAME?	no	-0.00210166	0.986282	grey
Arhgap11a	-0.303	-9.79	no	1.28851	9.87e-06	grey
Arhgap12	0.407	-81	no	-0.161844	0.361826	grey
Arhgap17	0.293	#NAME?	no	0.165966	0.359426	grey
Arhgap21	-0.256	-205	no	-0.151683	0.478666	grey
Arhgap22	1.37	-11	no	1.937	1.96e-08	grey
Arhgap23	-1.6	-29	no	0.514579	0.00229713	grey
Arhgap24	-0.122	-101	no	0.446691	0.0354928	grey
Arhgap25	0	-3.5	no	1.53466	1.49e-07	grey
Arhgap26	0.462	-9.41	no	0.602357	0.0297321	grey
Arhgap28	0.364	-14	no	0.460947	0.214414	grey
Arhgap29	0.266	#NAME?	no	0.123195	0.334286	grey
Arhgap30	-0.109	-178	no	1.88571	6.18e-10	grey
Arhgap31	0.165	-275	no	-0.00599229	0.98212	grey
Arhgap32	-0.812	-10.3	no	-0.166311	0.29832	grey
Arhgap35	0.741	-84.9	no	-0.0954056	0.421388	grey
Arhgap4	0.274	-19.2	no	1.45435	1.6e-05	grey
Arhgap42	-0.309	-2.66	no	0.0899108	0.689212	grey
Arhgap45	1.03	-51.2	no	1.95908	8.53e-12	grey
Arhgap5	0.531	-125	no	-0.110566	0.410751	grey
Arhgap6	-0.571	-5.02	no	-1.19226	8.05e-06	grey
Arhgap9	3.17	-1.33	no	1.96945	3.08e-09	grey
Arhgdia	0.116	-319	no	0.593967	1.18e-05	grey
Arhgdib	-0.255	-89.6	no	1.09791	7.43e-06	grey
Arhgef10	-0.309	-127	no	-0.0437728	0.766228	grey
Arhgef10l	0.566	-38.8	no	-0.403373	0.0414437	grey
Arhgef11	-0.246	-30.4	no	-0.00435088	0.977182	grey
Arhgef12	0.911	-31.6	no	-0.177248	0.158296	grey
Arhgef15	-0.112	-7.13	no	-0.337699	0.210841	grey
Arhgef2	0.0386	-46.7	no	0.28528	0.0629038	grey
Arhgef25	1.32	-65	no	-0.227836	0.264347	grey
Arhgef3	-0.141	-26.4	no	0.0242351	0.918339	grey
Arhgef39	1.4	-14	no	0.1604	0.829203	grey
Arhgef40	-0.247	#NAME?	no	0.127502	0.326335	grey
Arhgef5	-0.0929	#NAME?	no	0.332069	0.107413	grey
Arhgef7	0.57	-27.5	no	0.220647	0.194744	grey
Arid1a	-0.0257	#NAME?	no	0.0613102	0.657505	grey
Arid1b	-0.036	-270	no	-0.161147	0.155576	grey
Arid2	0.822	-58.9	no	-0.364926	0.0261179	grey
Arid4a	0.294	#NAME?	no	0.00891298	0.95714	grey
Arid4b	0.84	-10.1	no	-0.0494943	0.867055	grey
Arid5a	0.0934	-15	no	0.573482	0.0691085	grey
Arid5b	0.245	#NAME?	no	0.612981	0.000278023	grey
Arih1	0.171	-139	no	-0.186676	0.18106	grey
Arih2	0.105	#NAME?	no	-0.0988388	0.64822	grey
Arl10	1.54	-4.76	no	0.641361	0.0991203	grey
Arl13b	1.26	-7.51	no	-0.154472	0.312735	grey
Arl14ep	0.892	-10.9	no	0.0236029	0.902935	grey
Arl15	-0.177	-7.85	no	0.00492389	0.982774	grey
Arl3	0.606	-224	no	-0.553117	0.00108422	grey
Arl4a	0.46	-122	no	0.343984	0.0421468	grey
Arl4c	-0.898	-7.47	no	2.0696	7.02e-09	grey
Arl4d	0.344	-63.5	no	-2.01286	3.39e-06	grey
Arl5a	0.461	-35.2	no	-0.394358	0.0444519	grey
Arl6ip4	-0.733	-122	no	0.304565	0.143359	grey
Armc1	1.16	-15.8	no	-0.305349	0.145091	grey
Armc10	-0.12	-8.45	no	-0.541312	0.0115544	grey
Armc5	0.191	-46.2	no	-0.202616	0.281067	grey
Armcx2	-1.65	-4.04	no	-0.00170277	0.994469	grey
Armcx3	-0.115	-151	no	-0.107509	0.615701	grey
Armcx4	0.41	-176	no	0.733934	4.72e-05	grey
Armcx6	1	-17.3	no	-0.0383955	0.948969	grey
Arnt	0.621	-163	no	-0.203612	0.160299	grey
Arpc1b	0.0821	#NAME?	no	1.15105	1.11e-17	grey
Arpc2	-0.269	-208	no	0.790961	2.22e-07	grey
Arpc4	0.0326	-6.45	no	0.657285	4.43e-07	grey
Arpc5	0.693	-81.1	no	0.630174	0.00130887	grey
Arpc5l	1.21	-33.3	no	0.19428	0.561818	grey
Arrb1	0.804	-16.2	no	-0.191578	0.36015	grey
Arrdc3	0.111	-66.8	no	-0.150037	0.330132	grey
Arrdc4	0.649	-11.9	no	-0.276075	0.561445	grey
Arsa	-0.402	-67	no	0.524547	0.00666039	grey
Arse	1.55	-30.3	no	0.524927	0.0121373	grey
Arsi	-0.274	-74.8	no	1.57561	1.67e-06	grey
Arsj	-0.0945	-5.84	no	0.1052	0.796289	grey
Art3	-0.129	-52.7	no	-2.41435	0.0668683	grey
Arvcf	0.331	-6.34	no	-1.13657	0.00278544	grey
Asah2	-1.14	-9.08	no	-0.0538419	0.860329	grey
Asap1	-0.17	-46	no	0.17999	0.204836	grey
Asb3	-0.365	-21.8	no	-0.0702539	0.858321	grey
Asb8	0.294	-24.3	no	-0.0826331	0.747174	grey
Ascc2	0.958	-30.8	no	0.433068	0.0426472	grey
Ascc3	0.186	-7.68	no	0.0640995	0.615283	grey
Asf1a	0.015	-18.5	no	-0.0669832	0.831788	grey
Asgr2	0.712	-60.9	no	1.49512	0.00123677	grey
Ash1l	0.0444	#NAME?	no	-0.325642	0.00100547	grey
Ash2l	-0.469	-17	no	-0.178715	0.328538	grey
Asmtl	0.608	-138	no	0.0778828	0.768208	grey
Asns	1.49	-2.28	no	0.500882	0.111795	grey
Aspa	1	-3.5	no	-0.644621	0.052792	grey
Asph	-0.124	#NAME?	no	-0.347132	0.0170591	grey
Aspn	3.43	-42.7	no	-0.415942	0.731492	grey
Aspnl1	2.14	-3.17	no	-1.18823	0.200452	grey
Asun	-0.71	-47	no	-0.0330692	0.834616	grey
Asxl1	0.0856	-11.5	no	0.539774	0.0210689	grey
Asxl2	-0.649	-46.6	no	0.307766	0.047559	grey
Atad2	0.169	-163	no	0.330315	0.0210529	grey
Atad2b	-0.129	#NAME?	no	-0.0631899	0.756997	grey
Ate1	0.0463	-74.7	no	-0.25778	0.223083	grey
Atf1	-0.199	-86	no	0.0840169	0.614388	grey
Atf3	1.38	-5.59	no	-0.822117	0.219442	grey
Atf4	0.408	#NAME?	no	0.262071	0.185027	grey
Atf5	0.0573	-289	no	0.169469	0.143608	grey
Atf7	-0.115	-23.4	no	-0.0467684	0.787135	grey
Atf7ip	0.486	-14.7	no	-0.294782	0.0351621	grey
Atg101	0.0375	-14.2	no	0.0601834	0.807982	grey
Atg16l1	0.104	-9.14	no	-0.130511	0.451183	grey
Atg2a	0.19	-58.6	no	-0.142167	0.430698	grey
Atg2b	0.0377	-15.1	no	-0.204563	0.218716	grey
Atg4a	2.12	-8.5	no	0.0847178	0.81497	grey
Atg5	0.119	-92.2	no	0.0350432	0.906892	grey
Atic	0.678	-2.66	no	0.316462	0.0952612	grey
Atl3	0.0388	-91.2	no	0.065076	0.729877	grey
Atp11c	0.552	-8.74	no	0.0803914	0.665824	grey
Atp1a1	0.469	#NAME?	no	0.423874	0.0845705	grey
Atp1a2	0.253	#NAME?	no	-1.72777	1.67e-07	grey
Atp1b1	0.161	-52.2	no	-0.452049	0.0867176	grey
Atp1b3	0.556	#NAME?	no	0.608049	0.00073281	grey
Atp2a2	-0.213	-142	no	-2.05589	0.0287675	grey
Atp2b1	0.0965	#NAME?	no	0.912289	3.07e-16	grey
Atp2b4	0.0982	-82.4	no	-1.48607	6.5e-13	grey
Atp2c1	0.311	-96.6	no	0.228886	0.185746	grey
Atp5f1	0.322	-4.1	no	-0.891728	0.217481	grey
Atp5h	0.271	#NAME?	no	-0.753815	0.000987269	grey
Atp5i	0.0737	#NAME?	no	-1.05373	0.000247562	grey
Atp5j	-0.186	-127	no	-0.628792	0.0370955	grey
Atp5s	0.876	-5.29	no	-1.58008	0.00591141	grey
ATP6	0.253	#NAME?	no	-0.840579	0.000211788	grey
Atp6ap1	-0.884	-7.59	no	-0.0227225	0.884429	grey
Atp6v0e1	1.23	-93.9	no	-0.228521	0.21611	grey
Atp6v1b1	1.53	-7.99	no	-0.160609	0.919188	grey
Atp6v1b2	0.83	-2.72	no	0.122077	0.606915	grey
Atp6v1d	0.598	-78.2	no	-0.413068	0.137609	grey
Atp6v1e1	-0.262	-269	no	0.0330481	0.847447	grey
Atp6v1e2	2.5	-7.94	no	-1.81875	0.00309972	grey
Atp8b1	2.43	-6.65	no	1.26257	1.57e-19	grey
Atp8b2	0.478	-68.5	no	0.104259	0.363936	grey
Atp9b	1.13	-27.4	no	0.088328	0.543509	grey
Atpaf1	-0.392	-2.71	no	-0.307837	0.473025	grey
Atpif1	0.169	#NAME?	no	0.035957	0.785174	grey
Atrnl1	0.687	-21.5	no	-0.0221447	0.899387	grey
Atrx	-0.838	-14.6	no	-0.682729	2.29e-06	grey
Atxn2	0.173	#NAME?	no	-0.181167	0.210398	grey
Atxn3	0.585	-4.23	no	0.466809	0.0403997	grey
Atxn7	0.274	-27.7	no	0.230624	0.224114	grey
Atxn7l1	0.506	-3.49	no	0.126439	0.535605	grey
Atxn7l3	0.309	-19.4	no	0.358902	0.0745026	grey
Atxn7l3b	1.13	-23.5	no	0.0343599	0.836416	grey
Aurkaip1	-0.0433	-191	no	-0.188905	0.222896	grey
Aven	-0.616	-35.8	no	-0.0720613	0.803793	grey
Avpi1	0.127	-19.9	no	0.0634952	0.839662	grey
Axin2	0.541	-25	no	-0.65982	0.0121255	grey
Azi2	0.112	-6.62	no	-0.106056	0.601169	grey
B3galnt1	-1.32	-11.3	no	0.360644	0.0755942	grey
B3gat3	-0.817	-28.5	no	0.495966	0.0231228	grey
B3glct	1.2	-68	no	0.110365	0.527628	grey
B3gnt2	0.731	-73.6	no	0.246827	0.225321	grey
B3gnt8	1.12	-4.38	no	-0.317614	0.578593	grey
B3gnt9	-0.579	-23.2	no	0.624594	0.0104744	grey
B3gntl1	0.0535	-16.8	no	0.0709794	0.835431	grey
B4galt1	-0.028	-117	no	0.341154	0.127208	grey
B4galt4	-0.0334	-4.55	no	-0.525785	0.0609553	grey
B4galt6	0.527	-12.6	no	0.762519	0.00292699	grey
Babam1	-0.307	-27.1	no	0.277564	0.242922	grey
Bach2	-1.07	-3.75	no	-0.692732	0.10066	grey
Bag1	0.211	#NAME?	no	0.407169	0.0139822	grey
Bag2	0.531	-12.8	no	-0.45779	0.152308	grey
Bag3	0.662	-68.1	no	-0.309051	0.0289474	grey
Bag4	0.555	-23.4	no	0.143583	0.651813	grey
Bag5	1.51	-2.89	no	0.0852703	0.936324	grey
Bag6	0.165	-93.4	no	0.0817641	0.431616	grey
Bahcc1	0.369	-6.47	no	0.668219	0.00294117	grey
Bambi	-0.541	-3.83	no	-0.0382641	0.927506	grey
Banp	0.132	-17.8	no	-0.261841	0.147673	grey
Bap1	0.727	-77.1	no	-0.0404439	0.788878	grey
Basp1	-0.329	-11.7	no	2.12088	6.09e-14	grey
Baz1a	0.812	-27.7	no	1.02203	6.31e-11	grey
Baz1b	0.354	-150	no	-0.0809275	0.51809	grey
Baz2a	0.0997	#NAME?	no	-0.217397	0.156554	grey
Baz2b	-0.0624	#NAME?	no	0.0143816	0.913676	grey
Bbc3	-0.263	-5.27	no	0.648747	0.531803	grey
Bbof1	0.752	-3.85	no	-1.053	0.0746949	grey
Bbs7	1.09	-4.24	no	0.0723995	0.824213	grey
Bbx	-0.955	-8.9	no	0.075122	0.674416	grey
Bcam	0.8	-20.8	no	-0.13485	0.30499	grey
Bcan	-0.358	-11.4	no	-5.60844	0.0110617	grey
Bcap29	0.26	-39.7	no	-0.183966	0.469091	grey
Bcap31	0.301	-181	no	0.0964858	0.56889	grey
Bcar1	0.203	-10.4	no	0.241878	0.20707	grey
Bcar3	-0.682	-9.51	no	-0.278583	0.206791	grey
Bcas2	0.332	-61	no	-0.401022	0.0489712	grey
Bche	0.423	-45.8	no	-1.74334	1.08e-07	grey
Bcl2	-0.0588	-10.1	no	0.211245	0.525867	grey
Bcl2l1	1.07	-6.3	no	-0.0682246	0.672421	grey
Bcl2l13	0.268	-21.1	no	-0.11981	0.571888	grey
Bcl2l2	-0.826	-236	no	-0.0377537	0.844845	grey
Bcl7b	0.123	-77.8	no	-0.194217	0.28399	grey
Bcl9	0.206	-2.28	no	0.0530912	0.847869	grey
Bcl9l	-1.63	-81.6	no	-0.00293704	0.98596	grey
Bclaf1	0.688	-15.9	no	-0.124359	0.286364	grey
Bcorl1	0.419	-40.7	no	-0.257453	0.167398	grey
Bdkrb2	-2.09	-8.31	no	0.703798	0.0197994	grey
Bdnf	2.81	-18.3	no	1.7808	0.00784263	grey
Bdp1	-0.0365	-32	no	-0.0427796	0.669806	grey
Becn1	-0.946	-6.2	no	0.198588	0.198326	grey
Bet1l	-0.679	-111	no	-0.124713	0.50142	grey
Bex3	0.0147	-221	no	-0.360157	0.121066	grey
Bfar	0.157	-38.8	no	0.113278	0.48773	grey
Bgn	0.0926	#NAME?	no	1.28346	1.16e-15	grey
Bhlhb9	-0.259	-93.8	no	-0.327395	0.122416	grey
Bhlhe40	0.0849	#NAME?	no	1.09207	8.41e-10	grey
Bhlhe41	0.291	-14.3	no	1.11941	0.000185279	grey
Bicc1	0.194	-30.4	no	0.91156	3.46e-06	grey
Bicd2	-0.383	-16.5	no	-0.448508	0.000133318	grey
Bin1	-0.486	-56.3	no	0.139023	0.47549	grey
Birc2	-0.0306	-34	no	-0.58646	0.000232633	grey
Birc6	0.614	-18.8	no	0.00897283	0.927885	grey
Bivm	-0.812	-23.9	no	-0.303601	0.249674	grey
Bles03	0.629	-131	no	0.219493	0.434577	grey
Bloc1s2	0.217	-7	no	0.473615	0.349535	grey
Blzf1	0.496	-12	no	-0.175351	0.473486	grey
Bmf	-0.856	-5.19	no	-0.162571	0.575788	grey
Bmi1	0.944	-27.1	no	-0.269801	0.0768981	grey
Bmp2	1.29	-3.49	no	0.714094	0.163403	grey
Bmp2k	1.21	-20.3	no	0.914567	1.17e-07	grey
Bmp3	0.261	#NAME?	no	-1.46621	4.21e-09	grey
Bmp4	-0.223	#NAME?	no	-0.0379709	0.85302	grey
Bmp6	-0.505	-29.2	no	-0.379017	0.202268	grey
Bmpr1a	0.199	-52.2	no	-0.579591	0.00135923	grey
Bmpr1b	2.26	-1.85	no	-1.26659	1.3e-08	grey
Bmpr2	0.705	-52	no	0.138247	0.19829	grey
Bms1	1.24	-30.9	no	-0.246607	0.0459623	grey
Bnip2	-0.157	-15.2	no	-0.118097	0.432059	grey
Bnip3l	0.473	-29.1	no	0.0983889	0.5454	grey
Boc	-0.179	-298	no	0.126472	0.528727	grey
Bod1l1	0.543	#NAME?	no	-0.398237	0.000838056	grey
Bpgm	0.672	-4.96	no	0.210834	0.395845	grey
Bptf	2.22	-8.05	no	-0.151533	0.239774	grey
Brca2	3.32	-2.12	no	1.07616	0.000241557	grey
Brcc3	0.25	#NAME?	no	0.189873	0.297342	grey
Brd1	0.607	-19.9	no	-0.0763244	0.587941	grey
Brd3	0.313	-8.49	no	-0.165269	0.261133	grey
Brd4	-0.218	-238	no	0.149388	0.276602	grey
Brd7	0.167	#NAME?	no	0.449259	0.00136454	grey
Brd8	0.18	-14.3	no	-0.172257	0.330453	grey
Brd9	-0.216	#NAME?	no	0.0342106	0.816709	grey
Brf1	2.11	-3.94	no	-0.0707735	0.685787	grey
Brf2	-0.253	-3.64	no	-0.378641	0.372707	grey
Bri3	0.478	-37.5	no	-0.658049	0.00169745	grey
Brip1	3.3	-23	no	1.54547	8.98e-05	grey
Brix1	-0.554	-76.6	no	-0.129683	0.577241	grey
Brms1	-1.42	-2.64	no	0.936498	0.615717	grey
Brms1l	-0.426	-203	no	-0.190933	0.395396	grey
Brpf1	-0.667	-29.1	no	0.1561	0.307523	grey
Brpf3	0.491	-105	no	-0.150775	0.468762	grey
Brwd1	0.037	-287	no	-0.298233	0.0125996	grey
Brwd3	-0.14	-262	no	0.214265	0.264237	grey
Bsdc1	-0.495	-12.4	no	-0.111736	0.532237	grey
Bsg	1.3	-2.18	no	0.10004	0.511927	grey
Btaf1	0.543	-15.5	no	0.00702518	0.963014	grey
Btbd10	-0.158	-28.5	no	0.458826	0.0164823	grey
Btbd7	0.925	-29.7	no	-0.170178	0.252949	grey
Btbd9	0.234	-45.4	no	0.0930632	0.76641	grey
Btg2	0.00383	-47.4	no	-0.884865	0.00467948	grey
Btg3	2.57	-5.03	no	1.15523	7.81e-05	grey
Bub1b	0.678	-25.3	no	4.0813	1.82e-06	grey
Bud13	0.921	-6.13	no	-0.111946	0.628661	grey
Bysl	0.0842	-304	no	0.102838	0.606507	grey
Bzw2	-0.183	-42.9	no	-0.842899	0.080495	grey
C1d	0.258	-16.1	no	-0.0667176	0.856984	grey
C1galt1	0.81	-121	no	-0.0287483	0.86751	grey
C1galt1c1	0.719	-34.3	no	0.0967483	0.735513	grey
C1qb	0.999	#NAME?	no	2.03382	2.6e-23	grey
C1qbp	1.02	-122	no	-0.149439	0.485642	grey
C1qtnf1	0.908	-15.2	no	-0.64598	2.75e-05	grey
C1qtnf2	0.0114	#NAME?	no	-0.131509	0.646359	grey
C1qtnf7	-0.257	-174	no	-0.37558	0.0693269	grey
C1qtnf9	0.452	-85.3	no	-1.58848	0.00233358	grey
C1r	-0.265	#NAME?	no	0.911612	7.13e-10	grey
C1s	1.75	-32.9	no	1.35665	5.87e-11	grey
C2cd2	0.789	-4.44	no	0.0312754	0.81642	grey
C2cd3	3.05	-2.45	no	-0.221528	0.381967	grey
C4a	2.22	-84.3	no	1.796	0.000834612	grey
C5ar2	1.4	-17.6	no	2.2429	6.16e-09	grey
C6	0.515	-63.5	no	1.34669	0.000744795	grey
C7	0.245	#NAME?	no	0.402569	0.0535776	grey
Caap1	0.0778	-8.39	no	0.239385	0.381506	grey
Cab39	0.77	-5.75	no	-0.257973	0.134898	grey
Cables1	-1.89	-16.6	no	0.120708	0.584841	grey
Cacna1c	-0.239	-30.9	no	-0.63543	8.89e-07	grey
Cacna1d	2.82	-6.4	no	0.557527	0.0257197	grey
Cacna2d1	-0.0247	-65.5	no	-0.0510168	0.725496	grey
Cacnb2	-0.718	#NAME?	no	-1.07147	0.000273829	grey
Cactin	-0.239	-48.8	no	0.223806	0.417107	grey
Cacul1	0.221	-18.9	no	0.231211	0.253188	grey
Cacybp	-0.266	-265	no	-0.433538	0.0668461	grey
Calcrl	1.04	-15.6	no	0.429676	0.11015	grey
Cald1	0.139	#NAME?	no	0.0119843	0.959043	grey
Calhm2	0.12	-5.12	no	0.663805	0.000676783	grey
Calm1	0.241	#NAME?	no	0.581499	8.8e-05	grey
Calm2	0.344	-65.6	no	-0.0418488	0.867283	grey
Calm3	-0.0792	-253	no	-0.363413	0.0113027	grey
Calr	0.341	#NAME?	no	0.475038	0.000134335	grey
Calr4	-0.407	-6.15	no	-1.1989	0.348352	grey
Calu	0.0735	#NAME?	no	0.532595	0.00115386	grey
Camk1d	0.985	-7.02	no	0.663104	0.114726	grey
Camk2d	0.424	-3.98	no	-0.427236	0.00729484	grey
Camk2n1	0.00969	#NAME?	no	-1.16023	5.44e-06	grey
Camk4	0.337	-6.57	no	0.872624	0.716673	grey
Camkk1	-1.44	-5.86	no	0.0855922	0.726803	grey
Camlg	4	-3.01	no	0.0135055	0.965129	grey
Camsap1	0.186	-5.22	no	-0.161339	0.26466	grey
Camsap2	1.16	-13.2	no	0.0656774	0.55121	grey
Cand1	0.552	-13.8	no	-0.160972	0.275046	grey
Cant1	0.893	-6.97	no	0.151175	0.548533	grey
Canx	0.228	#NAME?	no	0.212686	0.0368573	grey
Capn15	0.803	-18.1	no	-0.0208912	0.949138	grey
Capn2	0.558	-85	no	-0.0980427	0.459198	grey
Caprin1	0.455	-38.9	no	0.122349	0.255274	grey
Capza2	0.131	-80.9	no	0.0125893	0.937109	grey
Capzb	0.476	#NAME?	no	-0.0423928	0.744676	grey
Car11	0.28	-5.58	no	-0.441638	0.304742	grey
Car3	-0.0585	-66.6	no	0.100499	0.644683	grey
Card10	-1.44	-3.34	no	-0.204328	0.380695	grey
Card6	0.437	-70.9	no	-0.0215799	0.926364	grey
Carhsp1	0.185	-102	no	1.18341	6.81e-10	grey
Cars	0.639	-270	no	0.630898	0.000639662	grey
Casc3	0.444	#NAME?	no	-0.301154	0.0415046	grey
Casd1	1.18	-59.3	no	-0.402728	0.147281	grey
Caskin2	0.0586	-3.97	no	-0.222003	0.316476	grey
Casp1	0.952	-2.63	no	0.94282	0.0460049	grey
Casp12	0.219	-77.4	no	-0.551955	0.0128387	grey
Casp8ap2	0.149	-198	no	0.087007	0.597088	grey
Casp9	0.902	-9.9	no	0.177577	0.639328	grey
Casq2	0.207	#NAME?	no	-0.160012	0.748357	grey
Cass4	2.07	-6.51	no	1.81979	0.0954516	grey
Cast	0.00495	#NAME?	no	-0.164967	0.239958	grey
Casz1	0.895	-4.66	no	-1.59877	1.79e-05	grey
Cat	0.112	-9.23	no	-1.02957	3.82e-06	grey
Catip	1.81	-5.2	no	-2.08395	0.433173	grey
Catsper2	1.21	-2.71	no	-0.199241	0.668564	grey
Cav1	-0.0383	-198	no	-1.33363	9.69e-12	grey
Cav3	1.47	-14.9	no	-0.842733	0.0437275	grey
Cbfa2t3	1.17	-15.7	no	-0.606648	0.00534031	grey
Cbl	-0.0369	-3.12	no	0.526174	0.00443783	grey
Cblb	-0.67	-13.8	no	0.0786307	0.675508	grey
Cbr3	1.47	-9.86	no	-0.325902	0.339427	grey
Cbr4	0.0838	-64.9	no	-0.535013	0.144634	grey
Cbx1	0.128	#NAME?	no	-0.116994	0.434568	grey
Cbx3	0.346	-46.3	no	-0.173356	0.274196	grey
Cbx5	0.412	#NAME?	no	-0.886857	5.28e-10	grey
Cbx6	0.804	-173	no	-0.0728618	0.661633	grey
Cc2d1a	1.12	-15.1	no	-0.304306	0.0493649	grey
Cc2d1b	0.422	-32.2	no	0.360739	0.106799	grey
Cc2d2a	-0.721	#NAME?	no	-0.586463	0.00201872	grey
Ccar1	-0.137	-264	no	-0.23667	0.135366	grey
Ccar2	0.272	-13.2	no	0.0692133	0.72082	grey
Ccdc102a	0.883	-13.1	no	0.360506	0.0538106	grey
Ccdc106	0.408	-18.6	no	-0.936257	0.0432013	grey
Ccdc107	0.289	-41.2	no	-0.457888	0.0242469	grey
Ccdc112	0.187	#NAME?	no	0.00372558	0.987104	grey
Ccdc12	0.192	-163	no	0.0624932	0.756414	grey
Ccdc124	0.294	-158	no	-0.193114	0.344508	grey
Ccdc125	2.05	-14.7	no	0.635774	0.158458	grey
Ccdc127	-0.207	-23	no	-0.228812	0.269729	grey
Ccdc130	-0.824	-81.7	no	-0.242014	0.354733	grey
Ccdc136	-0.163	-8.99	no	-0.21047	0.473998	grey
Ccdc137	-0.0411	-151	no	-0.129166	0.582574	grey
Ccdc141	0.377	-7.79	no	0.767926	0.328496	grey
Ccdc146	0.0795	-231	no	-0.080827	0.901841	grey
Ccdc149	-0.0938	-9.33	no	-0.331538	0.0988271	grey
Ccdc15	0.32	-28	no	-0.51515	0.050672	grey
Ccdc157	-1	-4.91	no	-0.442942	0.452153	grey
Ccdc170	0	-6.19	no	-1.63257	0.00322403	grey
Ccdc171	-0.129	-38.3	no	-1.05018	0.00264136	grey
Ccdc174	0.134	-16	no	-0.102095	0.675446	grey
Ccdc18	-0.443	-7.72	no	-0.453573	0.285484	grey
Ccdc180	-3.37	-10.3	no	-0.993393	0.707889	grey
Ccdc181	0.987	-66.5	no	-1.19267	0.00142555	grey
Ccdc186	0.888	-14.4	no	-0.39206	0.00328356	grey
Ccdc191	0.0267	-6.6	no	0.0539574	0.837598	grey
Ccdc25	0.328	#NAME?	no	-0.033599	0.836809	grey
Ccdc3	0.462	-37.6	no	-0.351471	0.246199	grey
Ccdc30	-0.263	-3.33	no	-0.851599	0.0535884	grey
Ccdc34	0.987	-127	no	-0.110467	0.729284	grey
Ccdc40	-0.784	-17.8	no	0.219701	0.878412	grey
Ccdc43	3.26	-3.38	no	-0.208578	0.3415	grey
Ccdc47	0.187	-28.9	no	-0.419356	0.000122997	grey
Ccdc50	-0.031	-26.7	no	-0.185365	0.0986505	grey
Ccdc57	0.58	-70.3	no	0.738651	0.000150859	grey
Ccdc58	-0.222	-43	no	0.0165284	0.967324	grey
Ccdc59	0.44	-30.1	no	-0.101933	0.702662	grey
Ccdc6	-0.161	-22.5	no	0.291798	0.242951	grey
Ccdc62	-0.189	-8.4	no	-0.515685	0.0645027	grey
Ccdc66	-0.189	-176	no	-0.432675	0.023383	grey
Ccdc69	0.415	-17.3	no	-1.24774	0.0447476	grey
Ccdc71	0.188	-77.8	no	0.133757	0.582016	grey
Ccdc77	-0.622	-46.6	no	-0.194748	0.647316	grey
Ccdc8	0.515	-14.8	no	0.149927	0.469653	grey
Ccdc80	1.21	-11.1	no	-0.14922	0.391657	grey
Ccdc82	0.897	-67.9	no	-0.0396637	0.858757	grey
Ccdc85b	0.885	-19.5	no	-0.35777	0.0730692	grey
Ccdc86	-0.00515	-34.8	no	-0.298895	0.283068	grey
Ccdc88a	0.606	#NAME?	no	-0.271105	0.0845227	grey
Ccdc88c	1.26	-24.3	no	1.02448	0.000317478	grey
Ccdc9	0.119	#NAME?	no	0.120553	0.454165	grey
Ccdc90b	0.68	-43.3	no	0.12281	0.556507	grey
Ccdc91	0.348	-216	no	-0.176428	0.25733	grey
Ccdc93	-0.503	-13.5	no	0.00965181	0.948113	grey
Ccdc94	0.28	-24.7	no	0.0246502	0.914248	grey
Ccdc96	-0.593	-12.1	no	-1.42963	0.04925	grey
Cchcr1	-0.402	-18.5	no	1.12687	3.75e-07	grey
Ccl21	0.322	-121	no	2.16205	1.04e-13	grey
Ccm2	0.823	-5.75	no	0.126545	0.520736	grey
Ccna2	-0.00123	#NAME?	no	2.2134	1.93e-06	grey
Ccnd1	1.52	-25.7	no	1.34438	4.27e-18	grey
Ccng1	-0.712	-29.9	no	-0.693807	0.215019	grey
Ccni	-0.354	-250	no	-0.500901	0.000964755	grey
Ccnl1	0.181	-53	no	0.0556907	0.717624	grey
Ccnl2	0.326	-83.8	no	0.0807843	0.529904	grey
Ccnt1	0.285	-16.8	no	-0.564103	0.277271	grey
Ccnt2	-0.295	-147	no	-0.156464	0.287968	grey
Ccpg1	0.0908	#NAME?	no	0.189649	0.245262	grey
Ccr1	0.17	-2.25	no	0.431971	0.501696	grey
Ccsap	-2.39	-18.1	no	1.07671	0.0509299	grey
Ccser1	0.113	-4.05	no	1.3693	0.0853112	grey
Ccser2	0.619	-53.7	no	-0.0965671	0.497507	grey
Cct2	0.344	#NAME?	no	-0.18365	0.284923	grey
Cct5	0.173	#NAME?	no	-0.374281	0.0031195	grey
Cct6a	0.58	-19.2	no	-0.467918	0.00529723	grey
Ccz1b	-0.133	-88.2	no	0.172977	0.26664	grey
Cd163	-0.499	-277	no	1.3749	2.03e-13	grey
Cd276	1.4	-3.3	no	0.462977	0.0391196	grey
Cd2bp2	0.0734	-17.7	no	-0.0974438	0.580873	grey
Cd300lf	3.39	-11.7	no	2.74084	0.0858117	grey
Cd302	0.481	-27.2	no	-0.266764	0.262425	grey
Cd34	0.727	-43.3	no	0.197677	0.0971797	grey
Cd4	0.744	-157	no	1.63456	2.43e-09	grey
Cd44	-0.234	#NAME?	no	1.66798	1.07e-20	grey
Cd47	1.56	-6.98	no	-0.0814939	0.622072	grey
Cd59	-0.318	-154	no	-0.506206	0.00513605	grey
Cd80	-1.23	-9.73	no	2.03347	2.2e-05	grey
Cd82	-0.781	-14.6	no	1.35618	1.16e-07	grey
Cd9	-0.354	-157	no	-0.5716	0.000546199	grey
Cd93	-0.17	-57.6	no	0.126583	0.430534	grey
Cdadc1	1.26	-13.4	no	-0.399571	0.0246884	grey
Cdc14a	-0.379	-7.11	no	-0.622229	0.0152549	grey
Cdc16	0.611	-57.1	no	-0.00386147	0.989837	grey
Cdc26	0.161	-6.5	no	-0.260269	0.261404	grey
Cdc27	0.11	-34.6	no	-0.224427	0.120134	grey
Cdc34	1.08	-34.7	no	-0.124942	0.617223	grey
Cdc37	-0.409	-184	no	-0.224602	0.0964843	grey
Cdc37l1	0.393	-110	no	-0.553489	0.00230068	grey
Cdc40	1.43	-25.7	no	-0.280261	0.351185	grey
Cdc42	0.913	-9.31	no	-0.139512	0.275933	grey
Cdc42bpa	0.149	#NAME?	no	-0.4728	0.000327122	grey
Cdc42bpb	0.166	-32.6	no	0.0598918	0.675692	grey
Cdc42bpg	0.0492	-9.02	no	-0.43999	0.0657385	grey
Cdc42ep3	0.472	-163	no	-0.757722	1.93e-05	grey
Cdc42ep4	1.04	-17.6	no	0.165571	0.446763	grey
Cdc42se1	-0.183	-41.5	no	0.567466	0.00387602	grey
Cdc5l	0.298	-139	no	-0.114145	0.377481	grey
Cdc73	-2.23	-84	no	-0.204729	0.228097	grey
Cdca2	4.81	-2.12	no	1.92349	0.00078411	grey
Cdca4	0.881	-16.5	no	0.396231	0.165158	grey
Cdca7	1.53	-8.05	no	1.33511	0.0136638	grey
Cdca7l	1.74	-4.15	no	1.97156	0.0877007	grey
Cdh11	0.385	-61.6	no	0.347016	0.0672202	grey
Cdh13	0.478	-57.3	no	0.800581	2.82e-06	grey
Cdh19	-1.13	-11.6	no	-0.656677	0.445937	grey
Cdh22	-0.973	-6.88	no	1.3201	0.107086	grey
Cdh23	0.592	-24.2	no	-0.839265	0.076669	grey
Cdh4	-1.64	-2.44	no	-5.80801	4.72e-10	grey
Cdh6	0.222	-110	no	-0.566199	0.00420897	grey
Cdk11b	-0.0347	#NAME?	no	-0.197001	0.100346	grey
Cdk12	0.287	-153	no	-0.048757	0.753536	grey
Cdk13	0.367	-82.3	no	0.0708689	0.608374	grey
Cdk14	0.833	-33.8	no	-0.0986689	0.605703	grey
Cdk16	0.652	-5.78	no	0.0695486	0.654861	grey
Cdk17	0.921	-6.4	no	0.33967	0.1476	grey
Cdk19	0.286	#NAME?	no	0.0108173	0.955316	grey
Cdk5rap2	0.46	-19.6	no	-0.292478	0.119528	grey
Cdk9	0.884	-8.49	no	0.288163	0.122188	grey
Cdkal1	-1.66	-11.1	no	-0.149579	0.616442	grey
Cdkl2	1.48	-6.62	no	-0.14574	0.626237	grey
Cdkn1b	-0.0784	#NAME?	no	-0.149652	0.435197	grey
Cdkn1c	0.745	-6.21	no	-0.450955	0.218749	grey
Cdkn2aip	0.406	-65.3	no	0.00074118	0.997206	grey
Cdkn2b	-1.85	-2.69	no	1.09499	0.416174	grey
Cdkn3	-0.607	-27.9	no	2.85817	4.3e-05	grey
Cdo1	-0.115	-100	no	-0.432058	0.00268015	grey
Cdr2	0.0207	-84.8	no	-0.00447314	0.984276	grey
Cdr2l	0.918	-8.69	no	0.431945	0.0180711	grey
Cdsn	0.813	-45.2	no	0.611598	0.128928	grey
Cdv3	0.734	-59.6	no	0.630992	1.2e-06	grey
Cdyl	0.338	-139	no	0.364195	0.00822531	grey
Cebpa	-0.222	-54.2	no	-0.160258	0.448487	grey
Cebpd	0.5	-17	no	1.19927	3.71e-12	grey
Cebpg	1.83	-15.5	no	0.553139	0.000204359	grey
Cebpz	0.265	#NAME?	no	-0.11612	0.503968	grey
Celf2	-0.0444	-7.39	no	-0.368315	0.018732	grey
Cenpb	-0.109	#NAME?	no	0.0721456	0.549895	grey
Cenpc	0.71	-110	no	-0.327817	0.138566	grey
Cenpe	-0.305	-2.25	no	1.65211	3.07e-12	grey
Cenpf	-0.515	-5.44	no	2.46979	8.66e-39	grey
Cenpj	1.19	-11.5	no	0.208056	0.360012	grey
Cep104	1.33	-30	no	-0.405867	0.00346605	grey
Cep112	0.0462	-3.09	no	0.0953838	0.758911	grey
Cep120	0.238	-191	no	0.109094	0.562405	grey
Cep128	0.828	-40.9	no	0.67586	0.00645913	grey
Cep131	0.308	-41.8	no	-0.325092	0.0853925	grey
Cep152	0.968	-3.25	no	0.460554	0.110596	grey
Cep162	1.04	-5.44	no	0.286783	0.439117	grey
Cep164	0.381	-8.26	no	0.443313	0.0104211	grey
Cep170	0.454	-11.5	no	0.0367235	0.83502	grey
Cep19	-0.113	-24	no	-0.367484	0.121321	grey
Cep250	0.416	-36.1	no	-0.301424	0.0477416	grey
Cep290	0.608	-2.96	no	-0.132016	0.436623	grey
Cep295	0.564	-18.5	no	0.0323544	0.90356	grey
Cep295nl	1.03	-20	no	0.307273	0.171677	grey
Cep350	0.748	-10.5	no	-0.195209	0.129427	grey
Cep57	0.81	-187	no	-0.643463	0.0189913	grey
Cep63	-0.215	-117	no	-0.236205	0.244414	grey
Cep68	0.0229	-219	no	-0.334703	0.0327888	grey
Cep83	0.971	-21.7	no	-0.330386	0.0563786	grey
Cep85	-0.00158	-95.4	no	0.18532	0.31825	grey
Cep85l	0.586	-107	no	-0.0876301	0.549861	grey
Cep95	0.64	-3.24	no	0.00438445	0.986549	grey
Cep97	-0.488	-9.26	no	0.434356	0.170613	grey
Cept1	0.708	-41.9	no	0.287948	0.177544	grey
Cercam	-0.133	#NAME?	no	0.591485	0.0028607	grey
Cerk	1.74	-6.86	no	0.796257	2.44e-05	grey
Cers2	0.393	-34	no	-0.10646	0.545052	grey
Cers4	-0.555	#NAME?	no	-0.596417	5.67e-05	grey
Ces1d	0.337	-17.4	no	-1.83601	3.09e-08	grey
Cetn2	0.456	-55.9	no	-0.629578	0.0237177	grey
Cfap36	0.384	#NAME?	no	-0.48612	0.0168033	grey
Cfap45	0.138	-11.6	no	0.352909	0.451352	grey
Cfap97	1.66	-4.11	no	0.146818	0.549194	grey
Cfdp1	0.198	-117	no	-0.11588	0.412292	grey
Cfh	0.728	-34.2	no	0.0525256	0.746964	grey
Cfl1	0.175	#NAME?	no	0.46949	0.0125435	grey
Cfl2	-0.35	-38.4	no	-0.425852	0.113198	grey
Cflar	0.425	-118	no	0.00123675	0.993226	grey
Cggbp1	0.576	#NAME?	no	0.14136	0.314376	grey
Cgn	1.18	-12.4	no	-0.712927	0.281168	grey
Cgnl1	-0.605	-292	no	-1.69902	1.02e-35	grey
Cgref1	0.388	-217	no	1.33476	1.36e-06	grey
Cgrrf1	0.612	-225	no	-0.292663	0.318137	grey
Chaf1a	-0.0555	#NAME?	no	0.54537	0.111736	grey
Champ1	0.0231	-10.2	no	-0.388738	0.0348067	grey
Chchd1	0.448	-17.1	no	-0.0849987	0.772256	grey
Chchd3	0.304	-31.6	no	-0.814679	0.00112421	grey
Chchd4	1.38	-5.66	no	-1.63867	0.00722987	grey
Chd1	0.0604	-297	no	0.294385	0.0214695	grey
Chd1l	-0.475	-15.7	no	0.00600292	0.980697	grey
Chd2	3.4	-2.8	no	-0.363301	0.0362062	grey
Chd3	-0.0857	#NAME?	no	-0.388138	0.0167994	grey
Chd4	-0.112	#NAME?	no	0.122952	0.243527	grey
Chd6	-1.77	-8.9	no	-0.418916	0.00470024	grey
Chd7	1.51	-66.6	no	0.338387	0.185716	grey
Chd8	1.04	-26.7	no	-0.185413	0.206831	grey
Chd9	-0.0696	-23.9	no	-0.505314	4.9e-05	grey
Chic1	-1.92	-2.53	no	-0.733145	0.0300403	grey
Chml	-0.946	-4.25	no	0.687517	0.129553	grey
Chmp1b	0.353	-52.8	no	0.410058	0.047851	grey
Chmp2b	-0.147	-251	no	0.0856634	0.683583	grey
Chmp4bl1	0.518	#NAME?	no	-0.443315	0.0128538	grey
Chmp4c	0.605	-29.3	no	0.0646701	0.8064	grey
Chmp5	0.507	-112	no	-0.089002	0.649151	grey
Chmp6	1.19	-6.79	no	0.666455	0.0514086	grey
Chmp7	1.68	-15.5	no	0.0260594	0.885463	grey
Chordc1	-1.04	-86.2	no	-0.722382	0.00432956	grey
Chpf	0.249	-140	no	0.801013	0.000113763	grey
Chpf2	0.947	-3.78	no	0.951281	9.28e-10	grey
Chpt1	0.168	#NAME?	no	-1.09603	8.78e-05	grey
Chrac1	0.194	-24	no	-0.508441	0.00541484	grey
Chrm4	-1.56	-16.9	no	-5.8167	0.128346	grey
Chrnb1	3.46	-2.23	no	-1.54893	0.0252279	grey
Chst11	1.74	-4.15	no	2.19763	8.4e-11	grey
Chst12	1.07	-27.7	no	0.125941	0.601322	grey
Chst2	0.202	-18.3	no	0.492697	0.161987	grey
Chst4	-0.363	-4.34	no	-1.29906	0.456173	grey
Chsy1	0.32	-180	no	0.127617	0.580868	grey
Chtf8	0.485	-2.78	no	0.0251788	0.879545	grey
Chtop	0.118	-32.7	no	0.471179	0.306718	grey
Chuk	-0.966	-19.6	no	0.00784419	0.971307	grey
Cic	-0.0885	-240	no	0.538017	1.78e-05	grey
Cidec	-0.14	-182	no	-1.19491	0.000189252	grey
Ciita	1.32	-2.72	no	2.58475	3.23e-13	grey
Cilp	0.213	-17.4	no	0.651018	0.00807958	grey
Cir1	0.364	-92.9	no	-0.376726	0.017757	grey
Cited2	0.922	-53.8	no	0.343705	0.0587262	grey
Ciz1	-1.5	-8.03	no	-0.0539421	0.800657	grey
Ckap2	1.41	-11.4	no	2.26427	2.56e-10	grey
Ckap4	-0.0419	-88.8	no	1.48853	8.6e-29	grey
Ckap5	-0.325	-18.1	no	-0.125177	0.369534	grey
Clasrp	-0.424	-40.1	no	-0.039639	0.809738	grey
Clcc1	0.389	-17.9	no	-0.0271141	0.877721	grey
Clcn3	0.479	-5.26	no	-0.625843	0.0301411	grey
Cldn5	0.408	-5.33	no	-0.963753	8.07e-05	grey
Clec11a	-0.686	#NAME?	no	1.97084	6.86e-18	grey
Clec14a	2.6	-6.79	no	0.563524	0.0232863	grey
Clec16a	0.138	-5.49	no	-0.176012	0.360491	grey
Clec1a	0.807	-4.12	no	-0.0986673	0.725593	grey
Clec3b	-0.116	#NAME?	no	-0.279268	0.199685	grey
Clec5a	1.94	-28	no	1.5126	0.190015	grey
Clec7a	1.33	-12	no	2.92778	2.66e-07	grey
Clec9a	0.0146	-19.9	no	-0.156531	0.755497	grey
Clic1	0.975	-81.4	no	1.06252	9.62e-10	grey
Clic6	-2.59	-14.2	no	-1.42642	0.0627463	grey
Clint1	-0.0979	#NAME?	no	0.0080655	0.946801	grey
Clip1	0.0093	-46.6	no	-0.315431	0.00313422	grey
Clip2	0.422	-12	no	1.06919	4.18e-09	grey
Clip3	2.42	-4.63	no	-1.79971	0.229794	grey
Clk2	-0.458	-22	no	0.247522	0.286033	grey
Clk4	0.463	-7.23	no	-0.14792	0.461799	grey
Clmn	-0.0247	-29.2	no	-1.80114	2.65e-09	grey
Clmp	-0.0785	-34.1	no	-0.0102977	0.968053	grey
Clns1a	-0.598	-20.7	no	0.0840002	0.656576	grey
Clock	-1.18	-21.2	no	-0.651466	8.74e-06	grey
Clpb	-1.3	-14.5	no	-0.0474199	0.849554	grey
Clspn	0.7	-6.36	no	1.49104	0.0607527	grey
Clstn1	-0.0721	#NAME?	no	-0.128878	0.446257	grey
Clta	-0.0258	#NAME?	no	0.299105	0.0135802	grey
Cltb	-0.326	#NAME?	no	0.114148	0.49039	grey
Cltc	1.41	-20.3	no	0.162499	0.129281	grey
Clu	0.0921	#NAME?	no	-0.566818	0.228931	grey
Cmah	0.819	-3.18	no	-1.77075	0.00276566	grey
Cmas	0.754	-11	no	-0.410048	0.0858643	grey
Cmc2	1.06	-12.8	no	0.130582	0.752838	grey
Cmklr1	-0.24	#NAME?	no	-0.305175	0.0646619	grey
Cmpk1	-0.386	-154	no	0.448064	0.00445094	grey
Cmss1	0.0902	#NAME?	no	0.578443	0.144346	grey
Cmtm6	1.28	-57.4	no	0.680542	8.83e-05	grey
Cmtr2	-1.58	-30.4	no	-0.168716	0.671866	grey
Cnbp	0.0437	-36.5	no	-0.296316	0.0191108	grey
Cngb1	-0.668	-27.5	no	0.443883	0.868779	grey
Cnn1	0.396	-196	no	-0.721408	0.0239325	grey
Cnn3	0.108	#NAME?	no	0.772938	0.000833505	grey
Cnnm2	2.22	-22.1	no	1.89392	2.13e-17	grey
Cnot1	0.497	-5.3	no	-0.0217629	0.85013	grey
Cnot10	-0.942	-10.6	no	-0.0399412	0.856629	grey
Cnot2	0.37	-28.3	no	-0.177633	0.233946	grey
Cnot4	0.798	-2.72	no	-0.217972	0.244769	grey
Cnot6l	0.0551	-4.41	no	0.382907	0.00424101	grey
Cnpy2	0.309	-22.7	no	-0.0772801	0.660698	grey
Cnpy3	0.225	-16.2	no	0.587137	0.000889198	grey
Cnpy4	-0.184	#NAME?	no	0.682892	1.02e-06	grey
Cnst	0.299	-18.2	no	-0.0271456	0.881011	grey
Cntln	0.647	-28.8	no	-0.0648701	0.81156	grey
Cntn2	-0.112	#NAME?	no	-1.3068	3.17e-06	grey
Cntnap1	-1.74	-3.61	no	-0.91802	0.00358514	grey
Cntrl	-0.738	-7.67	no	0.406151	0.00669486	grey
Coa5	0.624	-43.7	no	-0.836151	0.000178551	grey
Cobll1	0.862	-23.9	no	-0.803517	0.00667168	grey
Cog4	-1.51	-7.07	no	-0.321841	0.0593417	grey
Cog8	-1.03	-3.57	no	0.146024	0.639192	grey
Coil	-0.665	-29.5	no	0.0642232	0.867582	grey
Col12a1	1.13	-31.8	no	2.67533	3.76e-05	grey
Col13a1	2.14	-4.15	no	0.00435283	0.99423	grey
Col18a1	0.163	-275	no	0.928573	2.01e-12	grey
Col1a1	0.264	#NAME?	no	0.525008	6.07e-06	grey
Col1a2	-0.0707	-32.2	no	0.732027	0.117116	grey
Col27a1	-0.778	-5.33	no	-0.564866	0.0994709	grey
Col28a1	-1.53	-4.34	no	-0.581956	0.301763	grey
Col3a1	-0.081	#NAME?	no	0.343486	0.00278347	grey
Col4a1	-0.0336	#NAME?	no	1.22245	1.06e-32	grey
Col4a2	-0.362	#NAME?	no	1.03747	9.9e-19	grey
Col4a3	0.0725	-10.3	no	-0.709429	0.00642018	grey
Col4a3bp	1.33	-33.3	no	-0.0614197	0.701095	grey
Col4a5	-0.295	-11.5	no	-0.708136	6.39e-05	grey
Col5a1	0.216	#NAME?	no	0.837554	3.43e-09	grey
Col5a3	-1.19	-16.5	no	-0.546459	0.0180807	grey
Col6a1	-0.0273	#NAME?	no	0.580856	8.41e-06	grey
Col6a2	0.159	#NAME?	no	0.407901	0.000329899	grey
Col6a3	0.581	-129	no	0.92392	6.27e-11	grey
Col6a6	-0.44	-24.3	no	-2.75233	4.15e-12	grey
Col8a1	0.146	#NAME?	no	3.72412	5.14e-64	grey
Col8a2	2.11	-22.9	no	3.04121	8.19e-20	grey
Colec12	-1.02	-15.5	no	0.225395	0.181409	grey
Colgalt2	-1.4	-10.6	no	-0.655245	0.341333	grey
Colq	2.5	-3.5	no	0.572737	0.344456	grey
Commd1	0.925	-85.1	no	-0.309765	0.0498485	grey
Copb1	0.231	-52.1	no	0.254442	0.102289	grey
Copb2	0.428	-32.8	no	0.308301	0.0652269	grey
Cops2	1.6	-10.9	no	-0.308224	0.0456443	grey
Cops6	0.0896	-72.4	no	0.11148	0.672274	grey
Coq2	0.181	-13.3	no	-0.406198	0.251298	grey
Coq9	0.0977	-19	no	-1.28663	0.000581589	grey
Corin	-0.101	-121	no	-0.355701	0.126589	grey
Coro1c	0.555	-43.4	no	-0.457323	0.0201859	grey
Coro7	-0.712	-15.7	no	0.321525	0.184788	grey
COX1	0.242	#NAME?	no	-0.918819	0.000122588	grey
Cox11	1.78	-7.76	no	-0.191823	0.729486	grey
Cox19	-1.26	-4.91	no	-0.198896	0.638584	grey
COX2	0.434	#NAME?	no	-0.87035	0.00086421	grey
Cox5b	-0.205	-82.2	no	-1.07548	0.00177123	grey
Cox6a1	0.089	-51.7	no	-0.509213	0.0491619	grey
Cox7a2l	-0.108	-288	no	-0.143411	0.358872	grey
Cox7b	0.0677	#NAME?	no	-1.26564	0.000480659	grey
Cp	0.0123	#NAME?	no	0.368902	0.0318014	grey
Cpd	0.275	-170	no	-0.0304881	0.85399	grey
Cpe	0.081	-122	no	0.329828	0.00999997	grey
Cpeb4	-0.269	-42.1	no	-0.414981	0.00348637	grey
Cped1	0.176	-281	no	-0.446468	0.0154339	grey
Cplx1	0.936	-7.04	no	-2.56549	0.115866	grey
Cplx2	-0.399	#NAME?	no	-0.38692	0.0589058	grey
Cpne3	-0.899	-22.8	no	-0.324549	0.0597184	grey
Cpox	-0.272	-7.6	no	0.489405	0.0455385	grey
Cpped1	-1.03	-4.16	no	-0.0376854	0.931462	grey
Cpq	0.78	-47.2	no	0.656148	9.52e-06	grey
Cpsf2	0.317	-39.3	no	-0.045783	0.833238	grey
Cpsf3	2.61	-12.3	no	-0.393207	0.0380026	grey
Cpsf3l	0.0182	-6.45	no	0.120691	0.58581	grey
Cpsf4	-5.17	-4.2	no	0.269314	0.365351	grey
Cpsf6	0.465	-67.6	no	0.0120171	0.929725	grey
Cpsf7	-0.744	-12.1	no	-0.12852	0.52321	grey
Cpt2	-0.317	-43.1	no	-0.688788	0.00036513	grey
Cpxm2	0.306	-12.2	no	1.36316	6.33e-05	grey
Cracr2b	1.11	-34.3	no	-1.98691	0.0942668	grey
Cramp1	1.31	-15.3	no	0.245704	0.202659	grey
Crbn	0.212	-13.7	no	-0.412859	0.0187411	grey
Crcp	0.129	-21	no	-0.182723	0.352618	grey
Creb1	0.506	-54.6	no	0.00923482	0.966062	grey
Creb5	0.615	-7.11	no	-0.294434	0.143837	grey
Crebbp	0.229	-16.1	no	-0.104391	0.339157	grey
Crebl2	0.24	#NAME?	no	-0.661551	0.0049424	grey
Crebrf	0.432	#NAME?	no	-0.839589	5.2e-10	grey
Crebzf	1.31	-5.9	no	0.214163	0.173917	grey
Crem	1.15	-6.73	no	-0.225376	0.349774	grey
Crim1	-0.83	-3.65	no	-0.386656	0.00432576	grey
Crispld1	2.87	-2.72	no	-1.16733	0.00800972	grey
Crispld2	-0.113	-106	no	-1.56602	1.21e-24	grey
Crk	-0.0593	-151	no	0.22103	0.13999	grey
Crlf1	0.397	-47.6	no	1.06364	8.71e-05	grey
Crls1	0.055	-11.1	no	-0.595689	0.078287	grey
Crnkl1	0.6	-66.6	no	0.0430973	0.892684	grey
Crot	1.47	-9.36	no	-0.0268918	0.927928	grey
Crtc1	-0.0823	-28.8	no	-0.627897	0.000997969	grey
Crybg3	-0.935	-10.4	no	-0.143066	0.463254	grey
Csad	-0.118	-22.8	no	-0.588179	0.0217296	grey
Csde1	0.0248	-104	no	-0.361588	0.0123081	grey
Cse1l	-1.01	-14	no	-0.429664	0.0644594	grey
Csf1	-0.551	-64	no	0.149096	0.346104	grey
Csf2rb	1.36	-7.53	no	1.55768	1.65e-12	grey
Csgalnact1	1.77	-6.92	no	1.22169	2.31e-06	grey
Csgalnact2	0.0318	#NAME?	no	0.585996	0.000220081	grey
Csnk1d	-0.513	#NAME?	no	0.407091	0.0101065	grey
Csnk1e	-0.118	-79.4	no	0.129734	0.565383	grey
Csnk1g2	1.48	-10.9	no	0.106243	0.41779	grey
Csnk1g3	0.619	-41.8	no	-0.139548	0.415086	grey
Cspg4	0.322	#NAME?	no	0.331145	0.142577	grey
Cspp1	0.0696	#NAME?	no	0.0852513	0.64919	grey
Csrnp1	0.735	-16.5	no	0.548033	0.097931	grey
Csrp1	0.0524	#NAME?	no	-0.42233	0.100018	grey
Cstf1	-0.0931	-5.09	no	0.167954	0.539687	grey
Cstf2t	0.806	-24.8	no	0.0819477	0.674503	grey
Ctbp2	1.32	-11.9	no	-0.00245207	0.988563	grey
Ctbs	1.01	-15	no	0.533608	0.01562	grey
Ctcf	0.153	-255	no	-0.236733	0.0477475	grey
Ctcfl	-2.32	-3.5	no	-0.233951	0.896923	grey
Ctdnep1	-0.647	-45	no	0.0868022	0.703091	grey
Ctdp1	0.083	#NAME?	no	0.417783	0.00532761	grey
Ctdspl	0.188	-226	no	-0.0314503	0.90966	grey
Ctdspl2	1.39	-91.3	no	-0.274611	0.136555	grey
Ctgf	0.992	-259	no	2.02119	1.07e-18	grey
Ctif	-0.174	-2.99	no	0.73885	0.00930419	grey
Ctla2a	2.75	-4.03	no	-0.0911593	0.864779	grey
Ctnna1	0.284	-37	no	-0.334285	0.00549653	grey
Ctnna3	-0.00583	-1.83	no	-1.08975	0.00138587	grey
Ctnnb1	-0.0474	-46.9	no	-0.218943	0.0405382	grey
Ctnnbl1	0.478	-68.1	no	-0.0941105	0.669282	grey
Ctnnd1	0.251	-124	no	-0.124495	0.303191	grey
Ctr9	0.137	#NAME?	no	-0.184842	0.179479	grey
Ctsc	0.257	-3.13	no	-0.0115851	0.965785	grey
Ctsl	0.105	-64.4	no	0.334865	0.0218272	grey
Ctss	-1.04	-9.88	no	1.69357	4.45e-16	grey
Ctsz	1.26	-118	no	2.13577	1.05e-21	grey
Cttn	-0.415	-3.78	no	1.10545	0.245802	grey
Cttnbp2	2.24	-8.4	no	-0.17459	0.561106	grey
Cttnbp2nl	1.17	-4.9	no	0.25408	0.105614	grey
Ctu1	0.975	-3.52	no	0.696217	0.0987022	grey
Cuedc2	-0.213	-110	no	0.465512	0.104823	grey
Cul1	1.3	-22.1	no	-0.146903	0.30105	grey
Cul2	0.283	-8.25	no	-0.0167264	0.94901	grey
Cul3	0.695	-215	no	-0.129441	0.450746	grey
Cul4a	0.546	-68.9	no	-0.367039	0.00364126	grey
Cul4b	0.796	-52.3	no	0.324182	0.228755	grey
Cul5	0.638	#NAME?	no	-0.612897	5.85e-05	grey
Cul9	-0.231	-8.6	no	0.00835847	0.967973	grey
Cuta	1.44	-5.58	no	-0.146683	0.468424	grey
Cux1	0.936	#NAME?	no	0.393202	0.000220058	grey
Cwc15	-0.131	-208	no	-0.4085	0.00462771	grey
Cwc22	0.299	#NAME?	no	0.106106	0.472705	grey
Cwc25	0.451	-29.5	no	-0.142234	0.466358	grey
Cwc27	0.137	-14.3	no	-0.0262312	0.871977	grey
Cwf19l2	0.576	-61.9	no	-0.403293	0.0165782	grey
Cx3cl1	-1.26	-17.8	no	-1.07267	0.000501245	grey
Cxadr	0.948	-17	no	1.42816	0.219272	grey
Cxcl12	0.688	-142	no	0.965764	0.000201615	grey
Cxcl9	1.22	-5.4	no	1.58086	0.00472936	grey
Cyb5a	-1.49	-10.6	no	-0.418362	0.0301925	grey
Cyb5r1	-0.398	-11.1	no	0.343875	0.124686	grey
Cyb5r3	-0.21	#NAME?	no	0.308276	0.109778	grey
Cyb5r4	-0.0764	-146	no	0.1835	0.31296	grey
Cycs	0.301	-200	no	-1.13315	0.00475158	grey
Cyfip1	-0.647	-35.5	no	0.224942	0.0776944	grey
Cygb	-0.0437	-89	no	1.24024	7.74e-11	grey
Cyp1b1	-0.566	-14.9	no	0.224185	0.336592	grey
Cyp2j3	1.21	-9.01	no	-1.75676	2.84e-05	grey
Cyp2r1	0.0332	#NAME?	no	0.963589	0.583502	grey
Cyr61	-0.42	#NAME?	no	-0.90978	0.145335	grey
Cys1	1.13	-4.55	no	1.51467	0.00413402	grey
CYTB	0.314	#NAME?	no	-0.895666	0.000572055	grey
Cyth2	0.841	-30.4	no	0.182973	0.428295	grey
Cyth3	-0.115	-179	no	-0.0548859	0.701821	grey
Cyth4	0.13	-19.2	no	2.38767	1.5e-15	grey
Cyyr1	0.695	-5.12	no	0.140291	0.65534	grey
Daam1	-0.407	-87.3	no	-0.854666	1.12e-09	grey
Daam2	0.437	-11.2	no	-0.220616	0.407873	grey
Dab2	-0.0553	-65.5	no	0.971736	1.02e-13	grey
Dab2ip	0.0311	-29.9	no	-0.150051	0.214719	grey
Dach1	-0.126	-2.93	no	0.416132	0.233274	grey
Dact1	0.568	-5.77	no	-0.0466794	0.870757	grey
Dact3	0.907	-14	no	-0.330778	0.249206	grey
Dag1	0.235	-78.9	no	0.556946	1.42e-08	grey
Dap	0.203	-148	no	-0.166784	0.304128	grey
Daxx	-0.611	#NAME?	no	0.457985	0.0101476	grey
Dazap1	-1.32	-67.6	no	0.449422	0.0113764	grey
Dazap2	0.601	-137	no	-0.0328977	0.814406	grey
Dbi	-0.35	-76.1	no	-0.311654	0.113108	grey
Dbn1	-0.11	#NAME?	no	0.244609	0.231712	grey
Dbndd2	0.282	-43.2	no	0.214029	0.219207	grey
Dbnl	0.478	#NAME?	no	0.0367685	0.806356	grey
Dbp	0.386	-54.7	no	0.571368	0.0422123	grey
Dbr1	-0.724	-39.6	no	-0.274954	0.232029	grey
Dcaf1	0.445	-41.7	no	0.104694	0.560037	grey
Dcaf17	0.372	-133	no	0.366853	0.110875	grey
Dcaf5	-0.682	-11.3	no	0.0097045	0.955445	grey
Dcaf6	0.912	-27.4	no	-0.528529	0.000975133	grey
Dcaf8	0.976	-90.7	no	-0.46986	0.00174091	grey
Dcbld2	1	-9	no	-0.114799	0.580615	grey
Dchs1	-2.2	-2.37	no	0.135435	0.320283	grey
Dclk3	-1.22	-2.48	no	0.89825	0.453685	grey
Dclre1a	-0.413	-73.5	no	-0.0544326	0.810584	grey
Dclre1c	1.72	-14	no	0.571874	0.167213	grey
Dcn	0.628	-150	no	0.543227	0.000762705	grey
Dctn1	0.19	#NAME?	no	-0.289267	0.0335278	grey
Dctn2	0.00772	-99	no	-0.00682028	0.956408	grey
Dctn5	-0.519	-7.5	no	-0.163409	0.366236	grey
Dctn6	0.248	-213	no	-0.538497	0.0159026	grey
Dcun1d1	0.915	-89	no	-0.0599294	0.800167	grey
Dcun1d3	1.02	-24.2	no	0.233265	0.327467	grey
Dcun1d4	1	-2.03	no	-0.354345	0.216524	grey
Dcun1d5	0.645	-7.8	no	0.0491969	0.796424	grey
Dda1	0.423	-8.27	no	0.0325251	0.892568	grey
Ddhd1	0.475	-155	no	-0.178269	0.494723	grey
Ddit3	-0.176	-157	no	-0.0334263	0.863294	grey
Ddit4	0.481	-19.8	no	-0.205511	0.347589	grey
Ddost	-0.336	-61.2	no	0.600409	1.84e-05	grey
Ddr2	0.0648	#NAME?	no	-0.4129	0.0333572	grey
Ddrgk1	0.0364	#NAME?	no	-0.109131	0.397315	grey
Ddt	-0.306	-23.7	no	-0.382754	0.18258	grey
Ddx10	0.24	#NAME?	no	-0.224543	0.293083	grey
Ddx17	-0.578	-188	no	-0.191789	0.264037	grey
Ddx18	0.528	-37	no	-0.36165	0.0387952	grey
Ddx19a	-2.65	-30	no	0.0975578	0.648191	grey
Ddx20	0.737	-3.5	no	-0.53474	0.0558398	grey
Ddx21	1.37	-12.5	no	0.285331	0.0600441	grey
Ddx23	1.13	-43.9	no	-0.00447611	0.967336	grey
Ddx24	0.279	-269	no	-0.15175	0.270307	grey
Ddx27	0.669	-291	no	-0.143875	0.354186	grey
Ddx3	1.34	-43.9	no	-0.0935145	0.50269	grey
Ddx41	-0.491	-109	no	0.482459	0.0203987	grey
Ddx42	-0.165	-118	no	-0.0397008	0.749002	grey
Ddx46	0.466	-203	no	-0.0464714	0.683734	grey
Ddx47	-0.00738	#NAME?	no	-0.269718	0.132305	grey
Ddx49	1.36	-42.2	no	-0.0859044	0.760257	grey
Ddx5	-0.309	#NAME?	no	-0.261486	0.0191815	grey
Ddx50	0.222	-27.5	no	-0.267367	0.106792	grey
Ddx52	-0.712	-32.6	no	-0.27071	0.297948	grey
Ddx54	1.02	-16.7	no	0.68051	0.000167842	grey
Ddx55	0.59	-207	no	-0.278572	0.230139	grey
Ddx6	-0.362	-105	no	-0.145965	0.237272	grey
Decr1	0.292	-8.91	no	-0.946532	0.00768819	grey
Dedd	0.666	-40.2	no	0.240317	0.405407	grey
Dedd2	-0.804	-4.1	no	-0.105106	0.848037	grey
Degs1	0.605	-199	no	-0.0107502	0.944473	grey
Dek	0.166	#NAME?	no	-0.113982	0.471427	grey
Dennd1b	1.21	-8.71	no	-0.785489	0.00019989	grey
Dennd4a	0.494	-116	no	-0.731335	1.88e-05	grey
Dennd4c	0.348	-23.2	no	-0.308943	0.0390714	grey
Dennd5b	0.837	-26.5	no	0.0807326	0.637104	grey
Dennd6a	0.125	-57.6	no	-0.366923	0.0517842	grey
Denr	0.145	-53.2	no	0.0363198	0.867046	grey
Deptor	-0.789	-55.6	no	-0.0411815	0.84606	grey
Derl1	-0.066	-22.4	no	0.0570324	0.795591	grey
Des	0.0998	#NAME?	no	0.0993079	0.760433	grey
Dgcr8	1.19	-77.8	no	0.0414288	0.782955	grey
Dgkg	-2.32	-2.39	no	0.779922	0.057193	grey
Dgki	1.61	-22.5	no	-0.35292	0.131505	grey
Dgkq	-0.697	-4.24	no	0.304714	0.100757	grey
Dhrs3	-0.673	-8.57	no	-0.831116	0.00159888	grey
Dhrs4	-0.0945	-91.3	no	0.078321	0.781736	grey
Dhx15	-0.214	#NAME?	no	0.0495867	0.778192	grey
Dhx16	-0.39	-303	no	0.14592	0.393102	grey
Dhx29	0.921	-53.1	no	-0.0158026	0.940324	grey
Dhx32	0.645	-33.2	no	-0.405027	0.0944511	grey
Dhx34	1.02	-19.2	no	0.127135	0.646737	grey
Dhx36	-0.445	-5.92	no	-0.362742	0.0225825	grey
Dhx37	0.728	-65.6	no	-0.0705265	0.77149	grey
Dhx38	-0.0922	#NAME?	no	0.126037	0.369757	grey
Dhx40	0.0628	-140	no	-0.25153	0.246947	grey
Dhx57	-0.0656	-87.2	no	0.0237005	0.935883	grey
Dhx8	-0.0435	-152	no	-0.0100825	0.950711	grey
Dhx9	0.467	-124	no	-0.173525	0.230257	grey
Diaph1	0.19	-29.5	no	0.258332	0.04524	grey
Diaph2	-0.575	-13.3	no	0.322565	0.15897	grey
Diaph3	2.08	-7.79	no	1.17824	0.000390501	grey
Dicer1	0.945	-16.5	no	-0.254128	0.0657831	grey
Dido1	0.362	#NAME?	no	-0.070502	0.628648	grey
Diexf	-0.789	-32.8	no	0.172659	0.547342	grey
Dio2	2.78	-132	no	2.52928	7.36e-13	grey
Dio3	0.974	-11.9	no	7.59672	1.16e-28	grey
Dip2b	-0.336	-16.3	no	0.1279	0.48918	grey
Dirc2	-0.821	-19.5	no	-0.405197	0.0588611	grey
Dis3	2.34	-13.1	no	-0.222761	0.213616	grey
Disc1	2.53	-9.09	no	0.0695579	0.867068	grey
Disp1	0.363	-16.5	no	0.101849	0.695986	grey
Dixdc1	1.18	-6.67	no	0.262296	0.266175	grey
Dkc1	0.287	#NAME?	no	0.539271	0.00417238	grey
Dkk2	-0.879	-43.3	no	-0.652886	0.150929	grey
Dkk3	-0.406	-2.63	no	0.76655	2.72e-08	grey
Dlat	-0.00755	-71.4	no	-1.08661	0.000383556	grey
Dlc1	0.701	-164	no	0.154764	0.406843	grey
Dlg1	0.218	-290	no	-0.375078	0.0245198	grey
Dlg2	-0.494	-19.8	no	-0.538399	0.106818	grey
Dlg4	-0.737	-36.8	no	-0.281586	0.111352	grey
Dlg5	-0.837	-12.6	no	-0.0664034	0.69941	grey
Dlgap4	0.172	#NAME?	no	0.241666	0.0594113	grey
Dlst	0.179	-38	no	-0.820006	0.00103167	grey
Dlx1	1.1	-3.4	no	1.02972	0.492546	grey
Dmap1	0.508	-74.9	no	-0.211624	0.393923	grey
Dmd	0.345	-159	no	-1.09204	2.66e-11	grey
Dmp1	0.155	#NAME?	no	0.275037	0.196101	grey
Dmpk	0.433	-138	no	-0.527036	0.0057771	grey
Dmtf1	0.407	-4.83	no	-0.180396	0.245179	grey
Dmtn	0.336	-6.26	no	-1.65573	1.26e-05	grey
Dmwd	0.154	-57.8	no	-0.427458	0.0402451	grey
Dmxl1	0.964	-11.1	no	-0.258835	0.0213459	grey
Dnaaf2	0.433	-12	no	0.369714	0.20908	grey
Dnah17	2.39	-4.9	no	0.260022	0.707631	grey
Dnaja1	-0.19	#NAME?	no	-0.53021	0.0121302	grey
Dnaja4	-0.781	-91.2	no	-1.19724	0.000353061	grey
Dnajb1	-0.874	-46.4	no	-0.191293	0.447552	grey
Dnajb11	-1.26	-4.75	no	0.590156	0.00025425	grey
Dnajb12	0.551	-23.9	no	-0.00870654	0.946285	grey
Dnajb13	1	-1.59	no	-0.762278	0.599182	grey
Dnajb14	-0.0312	-14.6	no	-0.486649	0.0136749	grey
Dnajb2	-0.873	-21	no	-0.328573	0.0635705	grey
Dnajb3	-0.341	-3.84	no	-0.0238422	0.975416	grey
Dnajb4	0.33	#NAME?	no	-1.0697	5.96e-06	grey
Dnajb5	0.299	-40.6	no	-0.490791	0.0445171	grey
Dnajb6	0.979	-5.88	no	-0.0520976	0.69561	grey
Dnajb9	-0.661	-47.1	no	-0.268061	0.304746	grey
Dnajc1	-0.0285	#NAME?	no	0.182245	0.247896	grey
Dnajc10	0.331	-43.2	no	0.0566097	0.6095	grey
Dnajc11	-0.0824	#NAME?	no	-0.301329	0.224969	grey
Dnajc13	0.265	#NAME?	no	0.439862	0.000414776	grey
Dnajc15	-0.677	-12.7	no	-0.584658	0.046263	grey
Dnajc17	0.888	-7.35	no	-0.0995508	0.769144	grey
Dnajc19	-0.65	-12.8	no	-0.257531	0.23862	grey
Dnajc2	0.346	#NAME?	no	-0.148591	0.338385	grey
Dnajc21	0.518	#NAME?	no	-0.647171	0.00272921	grey
Dnajc25	0.669	-54.6	no	0.357658	0.144548	grey
Dnajc28	1.39	-13.2	no	-1.46636	0.000428422	grey
Dnajc3	0.359	-263	no	0.186402	0.262929	grey
Dnajc30	1.07	-3.66	no	-1.24707	0.0189782	grey
Dnajc7	-0.222	-8.41	no	-0.180445	0.22628	grey
Dnajc8	0.00623	#NAME?	no	-0.283296	0.0378137	grey
Dnajc9	0.286	-141	no	0.126742	0.564859	grey
Dnal4	1.46	-4.21	no	0.325185	0.392521	grey
Dnhd1	0.316	-24.5	no	0.108612	0.701496	grey
Dnlz	-0.783	-54.4	no	0.0665386	0.857941	grey
Dnm1	0.512	-11.7	no	0.0494881	0.830432	grey
Dnm1l	0.381	-27.7	no	-0.328169	0.108768	grey
Dnm2	-0.512	-19.9	no	0.368058	0.00784597	grey
Dnmbp	3.32	-1.82	no	-0.284347	0.144933	grey
Dnmt1	0.812	-103	no	0.561727	0.000683833	grey
Dnmt3a	-0.0155	-60.2	no	-0.376514	0.00664829	grey
Dnttip2	0.794	-52.5	no	-0.186557	0.279171	grey
Doc2b	-1.66	-3.62	no	-0.91402	0.00152272	grey
Dock1	0.733	-23.7	no	0.0073666	0.943845	grey
Dock10	0.152	-4.34	no	-0.298096	0.36932	grey
Dock11	0.973	-9.97	no	-0.313009	0.158971	grey
Dock4	0.0381	-12.2	no	-0.324765	0.241664	grey
Dock5	0.267	-6.47	no	1.15085	2.61e-11	grey
Dock7	0.201	#NAME?	no	-0.184585	0.222704	grey
Dock8	0.103	-16.7	no	1.70224	4.15e-35	grey
Dock9	0.676	-13.4	no	-0.335931	0.0114082	grey
Dohh	0.415	-3.78	no	-0.0703156	0.794506	grey
Dok1	-0.0224	-8.06	no	1.35301	0.000576068	grey
Dok2	-0.261	-18.8	no	1.06336	0.0131003	grey
Dolk	-0.706	-3.53	no	0.0187245	0.955668	grey
Donson	-0.159	-103	no	0.998896	0.0260766	grey
Dopey1	-0.205	-19.3	no	-0.161921	0.352473	grey
Dopey2	-0.378	-13.8	no	0.23518	0.209545	grey
Dot1l	-1.08	-31.9	no	-0.141729	0.435422	grey
Dpcd	-0.969	-10	no	-0.320589	0.292797	grey
Dpf2	-0.023	-38.6	no	-0.227805	0.323344	grey
Dph3	0.522	-9.15	no	0.0268342	0.921062	grey
Dpp8	-0.0619	-76.7	no	0.0334818	0.747941	grey
Dpt	-0.00561	#NAME?	no	-0.305131	0.0605087	grey
Dpy19l3	-1.41	-15.8	no	0.183333	0.462738	grey
Dpy19l4	1.68	-4.62	no	-0.334178	0.193352	grey
Dpysl3	-0.429	-56.9	no	0.491346	0.0222607	grey
Drap1	-0.0927	#NAME?	no	-0.206321	0.170812	grey
Drosha	0.194	#NAME?	no	-0.250332	0.0622266	grey
Dscr3	0.878	-11.3	no	0.220311	0.39156	grey
Dse	0.781	-7	no	0.622554	0.000469282	grey
Dsel	2.38	-3.56	no	0.333722	0.101989	grey
Dst	1.13	-22.4	no	0.23307	0.0663407	grey
Dstnl1	1.49	-3.15	no	-0.284932	0.311513	grey
Dtd2	1.81	-5.05	no	-1.68429	0.0155164	grey
Dtna	-0.0995	-15.6	no	-1.42479	2.54e-10	grey
Dtnbp1	-2.38	-4.72	no	0.321356	0.216829	grey
Dtx3l	3.03	-11.3	no	0.200961	0.590957	grey
Dtx4	1.1	-5.7	no	1.24674	8.77e-06	grey
Duoxa2	-0.193	-2.93	no	0.953333	0.738923	grey
Dus1l	1.72	-14.3	no	0.0122771	0.963826	grey
Dus3l	-1.12	-11.5	no	0.368325	0.165592	grey
Dusp1	0.195	#NAME?	no	-1.07794	0.0324447	grey
Dusp16	0.145	-12.7	no	-0.357541	0.252356	grey
Dusp18	-0.0101	-4.21	no	1.01321	5.86e-08	grey
Dusp22	-0.737	-4.06	no	0.175905	0.690634	grey
Dusp3	-0.0408	-56.9	no	-0.336789	0.0778119	grey
Duxbl1	2.17	-3.78	no	0.392129	0.367806	grey
Dync1h1	-2.74	-47.7	no	0.142392	0.115178	grey
Dync1li1	0.595	-19.3	no	0.334335	0.113132	grey
Dync1li2	-0.129	#NAME?	no	0.0777017	0.45141	grey
Dynll1	0.158	#NAME?	no	-0.553837	0.000443271	grey
Dynll2	-0.445	-108	no	-0.659673	0.00754499	grey
Dyrk1a	-0.623	-9.39	no	0.0657085	0.612918	grey
Dyrk2	1.33	-30.3	no	0.288683	0.0470264	grey
Dysf	-0.178	-145	no	-0.0673876	0.589338	grey
Dzf17	1.81	-4.09	no	0.258982	0.330212	grey
Dzip1	0.266	-9.6	no	-0.325312	0.152619	grey
Dzip1l	-0.423	-21	no	-0.215152	0.21799	grey
E2f1	-0.503	-4.55	no	0.486505	0.168273	grey
E2f3	0.807	-4.52	no	0.41465	0.353773	grey
Ebag9	0.292	-182	no	-0.155937	0.391925	grey
Ebf1	0.355	-6.93	no	0.236255	0.227907	grey
Echdc1	-0.389	-52.2	no	-0.243911	0.444792	grey
Ecm2	-2.13	-244	no	-0.432763	0.522949	grey
Ecsit	0.641	-10.1	no	-0.950538	0.0099265	grey
Edem2	-0.174	-281	no	1.18747	0.00103344	grey
Edem3	1.23	-49	no	0.336314	0.00665033	grey
Edf1	0.282	#NAME?	no	-0.211649	0.166666	grey
Ednra	-0.359	-26.3	no	-1.28002	2.45e-08	grey
Ednrb	0.47	-11	no	0.335844	0.215298	grey
Eea1	0.561	-6.41	no	-0.0621324	0.608342	grey
Eef1akmt1	-0.492	-4.07	no	0.287652	0.645169	grey
Eef1g	0.126	#NAME?	no	0.266914	0.0357629	grey
Eef2	0.166	-137	no	0.154668	0.193201	grey
Eef2k	-0.31	-282	no	-0.610839	0.00135118	grey
Eepd1	-0.000949	-8.83	no	-0.861997	8.02e-06	grey
Efcab14	0.538	-19.5	no	0.309563	0.0169211	grey
Efcc1	0.864	-5.17	no	-0.791266	0.0495905	grey
Efna1	1.33	-9.18	no	-0.39966	0.368979	grey
Efnb2	0.548	-133	no	0.0412194	0.878438	grey
Eftud2	-0.32	-127	no	0.0146596	0.948566	grey
Egln2	0.104	-69.3	no	0.326057	0.09274	grey
Egln3	0.394	-80.8	no	-1.25066	0.0050821	grey
Egr2	1.05	-48.6	no	1.55329	6.99e-06	grey
Egr3	3.19	-14.5	no	-0.851496	0.150816	grey
Ehbp1	-0.0908	-4.2	no	-0.654752	0.0196679	grey
Ehbp1l1	-0.185	#NAME?	no	-0.0251204	0.814995	grey
Ehd1	0.712	-107	no	-1.01261	9.5e-16	grey
Ehd2	0.282	#NAME?	no	-0.255113	0.0488888	grey
Ehd4	0.195	-145	no	-0.125312	0.664543	grey
Ehmt1	-0.148	-31.8	no	-0.0539127	0.739158	grey
Ehmt2	-0.167	#NAME?	no	0.405931	0.00864415	grey
Eid1	0.67	#NAME?	no	-0.204488	0.144003	grey
Eid2	1.96	-4.76	no	0.168331	0.829099	grey
Eid3	0.632	-182	no	0.68607	0.106024	grey
Eif1a	-0.659	-7.86	no	0.479491	0.00309547	grey
Eif1ad	-3.58	-2.94	no	0.126161	0.66192	grey
Eif1ax	0.883	-10.6	no	-0.110841	0.505491	grey
Eif1b	-0.0525	-13.4	no	-0.159106	0.670543	grey
Eif2a	0.593	-16.8	no	-0.41575	0.0549169	grey
Eif2ak1	-0.0395	-8.02	no	0.248955	0.103565	grey
Eif2ak2	-0.227	-33.3	no	0.054687	0.814095	grey
Eif2ak3	-0.0194	-26.4	no	0.153246	0.278885	grey
Eif2b5	0.922	-2.67	no	-0.443591	0.0107134	grey
Eif2s1	-0.597	-178	no	0.28761	0.185631	grey
Eif2s2	0.00509	#NAME?	no	0.179035	0.209786	grey
Eif2s3y	-0.537	-8.85	no	0.0542834	0.77172	grey
Eif3a	0.0807	#NAME?	no	0.0805074	0.384456	grey
Eif3b	0.119	-36.6	no	0.308742	0.0298021	grey
Eif3c	0.173	#NAME?	no	0.104005	0.270982	grey
Eif3d	-0.263	-130	no	-0.187436	0.202801	grey
Eif3h	-4.14	-63.2	no	0.723974	0.0481094	grey
Eif3l	-0.124	-22.2	no	-0.391759	0.0197306	grey
Eif3m	0.556	-112	no	0.0318038	0.831728	grey
Eif4a1	0.263	-105	no	0.498158	0.000835097	grey
Eif4a2	0.13	-43.4	no	-0.509342	1.98e-05	grey
Eif4a3	1.87	-4.31	no	0.260814	0.0939005	grey
Eif4b	0.0345	#NAME?	no	-0.154736	0.29947	grey
Eif4e	-0.107	-92	no	-0.450672	0.0174417	grey
Eif4e3	0.272	-44.1	no	-0.324143	0.172016	grey
Eif4enif1	-0.238	-32.8	no	0.267475	0.118996	grey
Eif4g1	0.128	#NAME?	no	0.196965	0.122331	grey
Eif4g2	-0.222	#NAME?	no	-0.149931	0.266057	grey
Eif4g3	-0.239	#NAME?	no	-0.0409775	0.705618	grey
Eif4h	0.317	#NAME?	no	0.0186205	0.906495	grey
Eif5	0.389	#NAME?	no	0.11139	0.424944	grey
Eif5a	-0.3	-244	no	0.377163	0.0191543	grey
Eif5b	0.242	#NAME?	no	-0.441184	0.0123971	grey
Elac1	0.183	-18	no	-0.600201	0.128685	grey
Elac2	0.312	-6.22	no	0.0790015	0.750979	grey
Elf1	0.648	-5.3	no	0.34025	0.109435	grey
Elf2	0.557	#NAME?	no	0.0871258	0.554141	grey
Elf4	0.576	-4.67	no	0.452587	0.0261253	grey
Elk3	-0.171	-8.6	no	1.07547	4.68e-11	grey
Elk4	0.169	-61.1	no	0.534149	0.00162919	grey
Ell2	0.459	-3.22	no	0.133408	0.565631	grey
Ell3	-0.116	-267	no	0.635229	0.0650038	grey
Elmo1	2.34	-6.2	no	0.124919	0.493084	grey
Elmsan1	2.15	-8.99	no	-0.24067	0.108891	grey
Eln	0.0545	#NAME?	no	-0.123114	0.656468	grey
Elovl1	0.143	-18.3	no	0.117103	0.61402	grey
Elp3	-0.338	-98.8	no	-0.193681	0.248596	grey
Emc1	-0.324	-22.5	no	-0.230875	0.104759	grey
Emc4	0.822	-29	no	-0.0210012	0.927914	grey
Emc9	-0.0735	-34	no	-0.630973	0.226839	grey
Emcn	1.43	-24.4	no	0.577851	0.121089	grey
Eme2	1.55	-15	no	0.119563	0.620332	grey
Emilin1	0.266	-30.1	no	0.882495	2.14e-07	grey
Emilin2	0.684	-12.2	no	0.000992377	0.996196	grey
Eml4	-0.304	-11.8	no	0.252699	0.145434	grey
Eml6	0.689	-5.79	no	-0.238974	0.499909	grey
Emp1	0.105	-290	no	1.4517	5.09e-21	grey
Emsy	0.325	-92.7	no	-0.0933426	0.467432	grey
Emx2	2.26	-12.6	no	-0.468413	0.573985	grey
Enah	0.456	#NAME?	no	-0.499934	0.0248692	grey
Enc1	0.239	-111	no	0.771508	6.1e-06	grey
Endod1	-0.531	-67.5	no	0.214213	0.339197	grey
Eng	0.635	-93.4	no	1.27809	5.68e-11	grey
Enox1	0.538	-136	no	-0.373081	0.370592	grey
Enpp1	0.484	-23.4	no	1.00089	4.91e-06	grey
Enpp2	0.549	-34.9	no	-0.115684	0.637423	grey
Enpp5	-1.28	-6.99	no	-0.352177	0.367886	grey
Entpd1	-5.72	-73.2	no	0.658284	0.300778	grey
Eny2	-0.638	-91.1	no	0.146266	0.54479	grey
Ep300	1.21	-23	no	-0.0360964	0.781334	grey
Ep400	1.29	-29.2	no	-0.0378043	0.766712	grey
Epb41	0.069	-31.6	no	-0.0936682	0.688098	grey
Epb41l1	0.506	-35.6	no	-0.537609	0.00715743	grey
Epb41l2	0.0529	#NAME?	no	0.046169	0.75306	grey
Epb41l3	-2.9	-10.9	no	1.04121	0.0269912	grey
Epc1	-0.43	-24.2	no	-0.32496	0.0250777	grey
Epc2	0.199	#NAME?	no	-0.132204	0.449533	grey
Epg5	-0.0728	-66.6	no	0.102788	0.539788	grey
Epha4	-0.57	-5.71	no	-2.76612	0.0050225	grey
Ephb4	0.928	-42.3	no	0.399695	0.011208	grey
Epm2aip1	1.37	-25.5	no	-0.484284	0.00201541	grey
Epn2	0.222	-56.2	no	-0.131399	0.481138	grey
Eppk1	1.93	-3.61	no	-0.393363	0.305684	grey
Eprs	0.692	-75.9	no	0.172113	0.174056	grey
Eps15	-0.0381	#NAME?	no	0.0254531	0.848879	grey
Eps15l1	-1.22	-4.32	no	0.12106	0.468293	grey
Eps8	0.55	-19	no	-0.544309	0.00417499	grey
Eqtn	0.126	-22.1	no	0.0757691	0.860755	grey
Erap1	-0.54	-9.35	no	0.182027	0.23654	grey
Erbb3	2.13	-23.2	no	2.49886	4.46e-15	grey
Erbb4	1.05	-64.9	no	0.878285	0.0113058	grey
Erbin	0.484	-270	no	-0.116837	0.246854	grey
Erc1	0.272	-29.3	no	0.0392006	0.776292	grey
Erc2	0.0234	-110	no	0.348688	0.872435	grey
Ercc3	0.12	-44.3	no	-0.236139	0.211447	grey
Ercc4	0.648	-18.9	no	0.676842	0.0376731	grey
Ercc5	0.294	-5.15	no	-0.618909	8.06e-05	grey
Ercc6	-0.0978	-271	no	-0.0487359	0.853419	grey
Ercc6l2	0.753	-23.8	no	-0.316205	0.0444011	grey
Erf	2.91	-3.84	no	1.2335	2.81e-12	grey
Erg	-0.322	#NAME?	no	1.5014	3.43e-12	grey
Ergic2	0.288	-69.6	no	-0.0979489	0.659046	grey
Eri1	0.135	-59.4	no	0.624603	0.015815	grey
Eri2	-0.933	-2.41	no	0.0383241	0.903019	grey
Erich1	1.09	-40.4	no	-0.521242	0.0145633	grey
Erlec1	0.993	-145	no	0.0987225	0.530636	grey
Erlin1	-0.0829	-48.8	no	0.712197	0.00153366	grey
Erlin2	-0.753	-14.2	no	-0.132435	0.460815	grey
Ern1	-0.0899	-6.83	no	0.105946	0.536765	grey
Erp29	0.306	#NAME?	no	1.13109	3.61e-16	grey
Errfi1	0.783	-65.7	no	-0.97621	0.000184455	grey
Esam	-0.732	-7.67	no	0.371936	0.0566028	grey
Esco1	0.101	-10.7	no	0.246283	0.276537	grey
Esf1	0.458	#NAME?	no	-0.460479	0.0069355	grey
Esm1	2.94	-101	no	4.96414	5.15e-38	grey
Etf1	-0.471	-81.4	no	0.213046	0.19974	grey
Etfa	0.406	-50.5	no	-1.05217	0.00069187	grey
Etfb	-0.0584	-64.7	no	-1.25115	0.000121733	grey
Etfdh	0.674	-14	no	-1.02409	0.000560078	grey
Etl4	0.632	-10.6	no	-0.30957	0.018613	grey
Ets1	0.319	-38.9	no	0.362994	0.00786785	grey
Ets2	0.213	-69.3	no	0.886643	1.37e-08	grey
Etv1	3.17	-2.39	no	-1.07878	0.0621638	grey
Etv3	-0.122	-33.3	no	0.0140178	0.924298	grey
Eva1b	0.33	-90.4	no	0.432382	0.0673181	grey
Eva1c	2.31	-13.7	no	-1.04911	8.08e-05	grey
Evc	-0.831	-6.64	no	-0.276691	0.155615	grey
Evi5	0.123	-232	no	-0.225525	0.144497	grey
Evi5l	0.0811	-25.9	no	0.0833222	0.676907	grey
Ewsr1	2.31	-102	no	1.31151	0.106374	grey
Exo5	0.997	-16	no	0.925148	0.0371286	grey
Exoc3	0.23	-57.7	no	-0.127948	0.514002	grey
Exoc5	-0.0885	-42.3	no	0.0268922	0.875148	grey
Exoc6	0.0244	-10.7	no	-0.34815	0.194462	grey
Exoc6b	1.72	-3.56	no	0.0990748	0.545876	grey
Exoc7	1.42	-4.07	no	-1.82511	0.31136	grey
Exoc8	-0.193	-6.18	no	0.160904	0.340294	grey
Exosc10	1.65	-7.29	no	-0.107889	0.420458	grey
Exosc2	-0.16	-4.07	no	0.498268	0.214943	grey
Exosc6	-0.88	-4.79	no	0.68548	0.152483	grey
Exosc9	-0.271	-15.4	no	-0.0890658	0.590272	grey
Exph5	-2.7	-3.22	no	-1.14551	0.142706	grey
Ext1	0.268	-228	no	0.718993	4.74e-08	grey
Ext2	-0.44	-13.4	no	0.200619	0.100956	grey
Extl3	0.666	-12.5	no	0.309698	0.0978582	grey
Eya4	-0.952	-5.66	no	-1.211	0.0125666	grey
Ezh1	-0.217	-65.1	no	-0.418274	0.00218427	grey
Ezh2	1.18	-31.3	no	0.649926	0.00453534	grey
Ezr	0.0468	#NAME?	no	-0.664585	0.000210467	grey
F11r	1.31	-10.4	no	0.0289738	0.886188	grey
F2r	-0.223	-116	no	2.18497	5.25e-28	grey
F8	1.47	-21.5	no	0.218062	0.232001	grey
F8a1	-2.56	-3.57	no	-0.711821	0.0787499	grey
Fabp4	0.195	#NAME?	no	-0.581477	0.0100744	grey
Fads2	0.0271	#NAME?	no	-1.61046	7.11e-16	grey
Faf1	-0.0426	-68.9	no	-0.153658	0.319327	grey
Faf2	0.338	-6.21	no	0.0160757	0.922499	grey
Fahd1	0.458	-188	no	-0.515764	0.0856088	grey
Fam104a	0.672	-95.4	no	0.0368437	0.864883	grey
Fam107a	0.762	-18.5	no	-2.51993	7.67e-13	grey
Fam107b	-0.285	-3.23	no	0.657241	0.000838681	grey
Fam110d	0.585	-3.4	no	0.904156	0.112885	grey
Fam111a	0.0825	-5.55	no	-2.02068	0.128586	grey
Fam114a1	-0.317	#NAME?	no	0.268787	0.203666	grey
Fam114a1l1	0.536	-100	no	0.123823	0.714104	grey
Fam114a2	0.524	-16.8	no	-0.121821	0.524225	grey
Fam117b	-0.758	-2.83	no	-0.160859	0.279777	grey
Fam120b	1.84	-5.25	no	-0.341186	0.0572312	grey
FAM120C	-0.0238	-2.95	no	-1.42013	1.96e-10	grey
Fam122a	1.68	-9.71	no	-0.43761	0.268539	grey
Fam126a	-0.176	-6.42	no	-0.595786	0.0116332	grey
Fam126b	-0.0602	-50.9	no	-0.301937	0.221893	grey
Fam129a	0.122	#NAME?	no	-2.01792	2.85e-24	grey
Fam133b	0.134	#NAME?	no	-0.543287	0.0315154	grey
Fam134c	0.404	-11.7	no	-0.116502	0.545585	grey
Fam135a	0.27	-220	no	-0.0910624	0.584176	grey
Fam136a	0.231	-7.17	no	-0.0365703	0.890729	grey
Fam13a	1.16	-17.6	no	-0.835914	0.0126776	grey
Fam13b	0.779	-13.9	no	0.119749	0.403338	grey
Fam149a	-0.149	-11.4	no	0.413874	0.0486065	grey
Fam149b1	0.871	-9.51	no	-0.168818	0.288032	grey
Fam160a1	-0.607	-16.8	no	-0.528715	0.542716	grey
Fam160a2	0.477	-6.01	no	0.138865	0.602572	grey
Fam160b2	-0.553	-6.44	no	-0.45423	0.0264151	grey
Fam166a	0.152	-5.23	no	1.26466	0.681247	grey
Fam168a	0.224	-117	no	-0.722438	1.54e-06	grey
Fam169b	2.36	-32.1	no	0.569879	0.268689	grey
Fam171a1	0.0878	#NAME?	no	0.422514	0.060628	grey
Fam171a2	1.58	-12.9	no	0.69481	0.0384308	grey
Fam171b	-0.497	-20.9	no	-1.00804	1.05e-05	grey
Fam175b	1.18	-7.6	no	-0.0237063	0.902856	grey
Fam177a1	0.207	#NAME?	no	0.395933	0.0107601	grey
Fam181b	0.585	-2.72	no	0.791317	0.455402	grey
Fam184a	-0.994	-7.74	no	0.485378	0.265552	grey
Fam189a1	0.386	-8.06	no	2.27081	0.401483	grey
Fam192a	0.188	-195	no	0.141994	0.422185	grey
Fam193a	3.32	-3.61	no	0.0143376	0.948472	grey
Fam193b	0.000888	-7.13	no	-0.347564	0.104403	grey
Fam198b	0.494	-166	no	1.36567	7.38e-11	grey
Fam204a	0.724	-23.6	no	0.108551	0.69	grey
Fam208a	0.913	-24.5	no	-0.179513	0.141794	grey
Fam208b	0.831	-16.1	no	-0.358016	0.0528686	grey
Fam20c	0.646	-289	no	0.609811	5.94e-05	grey
Fam210a	-0.434	#NAME?	no	-0.491993	0.0129129	grey
Fam210b	-0.933	-15.4	no	-1.52339	3.06e-12	grey
Fam212b	-0.992	-43.9	no	-1.51875	8.6e-10	grey
Fam214a	0.213	-47.3	no	-0.281022	0.135541	grey
Fam214b	1.02	-13	no	0.574393	0.0421431	grey
Fam217b	-0.134	-117	no	-0.356103	0.205885	grey
Fam21c	0.282	-158	no	0.0995335	0.436436	grey
Fam227b	-0.139	-11.5	no	-0.25701	0.856922	grey
Fam32a	-0.0474	#NAME?	no	-0.023911	0.888667	grey
Fam46a	0.0174	-12.7	no	0.600567	0.00486883	grey
Fam49b	-0.597	-6	no	0.719632	0.00327055	grey
Fam50a	0.763	-16.4	no	-0.931539	0.723257	grey
Fam53a	-0.644	-16.4	no	-0.208304	0.45234	grey
Fam53c	0.0199	-15.7	no	-0.242146	0.256958	grey
Fam58b	-0.363	-2.68	no	-0.107983	0.850178	grey
Fam63b	-0.411	-17	no	-0.968511	0.00431929	grey
Fam65c	-0.737	-3.65	no	-0.171375	0.784655	grey
Fam69a	1.69	-8.11	no	-0.161179	0.550244	grey
Fam76a	-0.14	-14.6	no	0.524374	0.00609793	grey
Fam78b	-1.95	-9.81	no	-1.53212	0.00484669	grey
Fam8a1	1	-28.8	no	-0.247378	0.158004	grey
Fam92a1	1.34	-8.06	no	-0.336407	0.232155	grey
Fam98a	-0.244	#NAME?	no	-0.0140795	0.936251	grey
Fan1	-3.92	-7.45	no	-0.202328	0.572128	grey
Fancc	-1.7	-3.5	no	-0.444818	0.0706582	grey
Fance	-0.414	-71.8	no	0.199564	0.498951	grey
Farp2	0.0234	-8.37	no	0.42874	0.00919197	grey
Fas	1.39	-20	no	-0.0980304	0.792695	grey
Faslg	5.23	-22.2	no	1.94777	0.563504	grey
Fastkd5	-0.457	-2.67	no	-0.0120843	0.972296	grey
Fat1	0.473	-132	no	0.855409	1.59e-10	grey
Fat4	0.557	-14.1	no	-0.132686	0.441572	grey
Fbl	-0.819	#NAME?	no	0.384	0.244509	grey
Fbln2	-0.128	-101	no	1.28555	1.87e-08	grey
Fbln5	-0.171	#NAME?	no	-0.512388	0.0144576	grey
Fbn1	0.439	-284	no	0.698074	1.23e-05	grey
Fbrs	0.0525	-3.24	no	0.0977568	0.479484	grey
Fbxl13	0.322	-4.38	no	-2.79865	0.335045	grey
Fbxl19	0.75	-5.28	no	0.16691	0.563567	grey
Fbxl20	-1.51	-5.04	no	-0.102344	0.637349	grey
Fbxl22	-0.55	-5.19	no	-1.08893	1.13e-05	grey
Fbxl3	-0.295	-7.21	no	0.0104201	0.959505	grey
Fbxo11	0.351	-68.9	no	-0.0532691	0.737829	grey
Fbxo15	0.806	-30.1	no	-0.831345	0.218554	grey
Fbxo18	0.148	-11.4	no	0.0947321	0.558096	grey
Fbxo28	-0.0269	-15.1	no	0.238131	0.395877	grey
Fbxo3	-1.42	-8.68	no	-0.25175	0.154444	grey
Fbxo30	-0.515	-6.34	no	0.519801	0.00252745	grey
Fbxo31	2.03	-8.05	no	-0.228447	0.447994	grey
Fbxo38	1.77	-5.92	no	-0.402576	0.0445469	grey
Fbxo40	0.657	-11.1	no	-2.57346	0.000132097	grey
Fbxo5	1.65	-22.8	no	1.0564	0.0572279	grey
Fbxw11	0.0395	-11.8	no	0.00337175	0.985958	grey
Fbxw2	0.5	-88.9	no	-0.327251	0.0543088	grey
Fbxw4	0.639	-237	no	0.252977	0.369605	grey
Fbxw7	-0.242	-233	no	-0.348023	0.0881115	grey
Fcgr1a	2.97	-25.7	no	1.99636	9.36e-05	grey
Fcho2	0.477	-157	no	0.0987331	0.537295	grey
Fcna	0.701	-58.5	no	1.84861	4.32e-12	grey
Fcrl2	-0.0544	-5.29	no	3.09935	2.53e-07	grey
Fdx1l	-0.741	-52.1	no	0.0299087	0.893259	grey
Fem1a	0.857	-28.3	no	-0.780107	0.00824957	grey
Fem1b	0.512	-59	no	-0.134004	0.501422	grey
Fem1c	0.827	-20.6	no	-0.105594	0.675227	grey
Fen1	-0.0227	-7.35	no	0.954613	0.122967	grey
Fer	-0.692	-15.3	no	-0.00992227	0.962897	grey
Fermt2	0.265	-133	no	-0.351611	0.0337272	grey
Fes	0.42	-33.3	no	1.80384	6.59e-09	grey
Fez2	0.131	-5.2	no	0.0993448	0.655424	grey
Ffar4	2.09	-5.68	no	-0.416528	0.83793	grey
Fgd3	-0.862	-12	no	1.87475	2.48e-08	grey
Fgd5	0.212	#NAME?	no	-0.379123	0.0309683	grey
Fgd6	-0.136	-3.47	no	0.47456	0.0898119	grey
Fgf12	0.884	-29.3	no	-1.89861	8.89e-16	grey
Fgf14	2.28	-5.21	no	-1.03583	0.00330667	grey
Fgf18	1.28	-75	no	0.632042	0.378355	grey
Fgf2	1.8	-3.94	no	-0.539972	0.242338	grey
Fgf9	1.93	-3.43	no	1.72747	0.146868	grey
Fgfr1op2	0.0916	-84.2	no	0.316484	0.00668471	grey
Fgfr2	-0.00838	-94.4	no	-0.21611	0.34414	grey
Fgfr3	-0.0498	-11.1	no	0.113526	0.668715	grey
Fh	0.542	-28.9	no	-0.907715	0.00499858	grey
Fhad1	-0.791	-5.02	no	-1.22818	0.358338	grey
Fhl1	0.986	-123	no	-0.41389	0.0345363	grey
Fhod3	0.129	-152	no	-2.40824	1.05e-16	grey
Fibin	0.263	-12.5	no	0.691003	0.000171771	grey
Fig4	-0.382	-35.2	no	-0.231158	0.272608	grey
Fignl1	-0.193	-2.94	no	-0.727294	0.593385	grey
Filip1	-0.162	#NAME?	no	-1.68092	1.33e-09	grey
Filip1l	0.0559	-14	no	-0.0571104	0.796823	grey
Fip1l1	-0.219	#NAME?	no	-0.136293	0.276232	grey
Fjx1	1.15	-3.66	no	1.53138	2.43e-05	grey
Fkbp14	-0.363	-4.15	no	0.0591306	0.822754	grey
Fkbp15	-0.118	-6.98	no	0.2528	0.33268	grey
Fkbp2	-0.292	-80.9	no	0.0548274	0.796127	grey
Fkbp3	0.416	#NAME?	no	-0.553966	0.096281	grey
Fkbp4	1.36	-5.47	no	-1.23402	1.07e-06	grey
Fkbp5	-0.45	#NAME?	no	-1.20799	0.000398141	grey
Fkbp7	-0.085	-239	no	0.377096	0.0426245	grey
Fkbp8	-0.105	-19.4	no	-0.0275092	0.85037	grey
Fkbp9	-0.809	-47.4	no	0.464951	0.000705436	grey
Fkrp	0.712	-24.6	no	-0.131674	0.609878	grey
Fktn	0.581	-24.6	no	-0.1491	0.367764	grey
Fli1	0.82	-294	no	0.61204	0.00327981	grey
Flii	0.243	-15.1	no	-0.181455	0.0845454	grey
Flna	-0.0821	#NAME?	no	-0.631428	0.00949527	grey
Flnc	-0.457	-40.5	no	-0.704585	0.00785939	grey
Flot1	0.139	-321	no	0.235957	0.0736503	grey
Flot2	0.231	-232	no	-0.395982	0.00238888	grey
Flrt1	-0.138	-4.06	no	-0.710297	0.0156196	grey
Flrt2	1.92	-6.17	no	1.54386	3.87e-21	grey
Flt1	1.49	-4.58	no	0.460201	0.0241953	grey
Flvcr2	0.815	-14.2	no	1.06176	0.00101584	grey
Flywch1	0.035	-284	no	-0.28162	0.234779	grey
Fmn1	-0.753	-22.8	no	1.99367	8.26e-10	grey
Fmnl3	0.812	-12.7	no	1.14701	2.74e-17	grey
Fmo2	-1.07	-12	no	-1.67991	2.98e-09	grey
Fmo4	2.58	-4.34	no	-0.148154	0.739389	grey
Fmr1	0.309	#NAME?	no	0.0106543	0.952785	grey
Fn1	0.0838	#NAME?	no	2.95056	6.68e-51	grey
Fn3krp	-0.766	-9.61	no	-0.396256	0.10677	grey
Fnbp1	-0.142	#NAME?	no	0.310184	0.230341	grey
Fnbp1l	0.553	-4.24	no	0.514364	0.0440144	grey
Fnbp4	-0.139	#NAME?	no	-0.0195978	0.890621	grey
Fndc1	0.833	-130	no	2.25954	7.55e-07	grey
Fndc3a	0.444	-15.7	no	-0.0489152	0.776972	grey
Fndc3b	-0.095	#NAME?	no	0.487783	0.00347724	grey
Fndc5	-1.41	-13.8	no	-2.16365	1.41e-13	grey
Fnip1	0.655	-9.75	no	-0.129124	0.347135	grey
Fnip2	1.02	-16.5	no	0.568482	0.00644731	grey
Fos	-0.305	#NAME?	no	-2.07722	0.0072488	grey
Fosb	-0.211	-17.6	no	-1.54877	0.144862	grey
Foxc1	0.991	-145	no	-0.896584	1.85e-05	grey
Foxg1	-3.65	-33.4	no	-0.394443	0.556007	grey
Foxj3	-0.876	-8.09	no	-0.261224	0.0521882	grey
Foxk1	-1.05	-12.6	no	0.0319559	0.911109	grey
Foxk2	0.0551	-11.8	no	0.155321	0.435162	grey
Foxn2	0.602	-35.8	no	0.480466	0.060299	grey
Foxn3	-0.196	-59.2	no	-0.510798	0.00251981	grey
Foxo1	0.829	-96.5	no	-0.951295	1.4e-10	grey
Foxo3	0.169	-51.8	no	-0.42049	0.0129315	grey
Foxo4	0.364	-53.8	no	-0.255308	0.268731	grey
Foxp1	0.0117	-12.7	no	0.573997	2.37e-05	grey
Foxp2	-0.164	-21.2	no	-0.401973	0.119921	grey
Foxred1	-0.402	-34.8	no	-0.929284	0.000455216	grey
Fra10ac1	0.452	-50	no	-0.162647	0.493119	grey
Frat2	1.22	-31.6	no	0.807634	0.050252	grey
Frem1	4.32	-5.78	no	2.23468	8.4e-08	grey
Frg1	-0.512	-98.6	no	-0.244254	0.320703	grey
Frk	1.44	-15.9	no	-0.351064	0.212175	grey
Frmd4b	1.08	-38.3	no	0.955395	1.79e-08	grey
Frs2	0.126	-19.5	no	-0.0598929	0.765856	grey
Fry	-0.173	-28.5	no	0.453244	0.00161236	grey
Fryl	-0.677	-36.2	no	-0.579786	0.000239721	grey
Frzb	0.084	-21.3	no	0.00674932	0.978352	grey
Fsd1l	-0.621	-6.17	no	-1.28054	0.0121271	grey
Fst	-0.23	-72.7	no	1.82832	1.17e-09	grey
Fstl1	0.0758	#NAME?	no	0.376138	0.0335602	grey
Ftsj3	-0.11	-43.2	no	0.133021	0.507512	grey
Furin	0.802	-33.8	no	0.448091	0.000210483	grey
Fus	-0.0988	-109	no	0.112341	0.425366	grey
Fut11	-0.544	-8.05	no	0.170369	0.486409	grey
Fut8	0.376	-23.7	no	-0.0495081	0.842396	grey
Fxr2	-0.718	-43.6	no	-0.0382514	0.795423	grey
Fyb	0.7	-146	no	1.43591	6.86e-06	grey
Fyco1	-0.588	-10	no	-1.02098	2.88e-06	grey
Fyttd1	1.62	-56.9	no	-0.212274	0.215534	grey
Fzd1	1.04	-17.6	no	0.464652	0.098893	grey
Fzd4	-0.0863	-27.7	no	-0.00296684	0.989035	grey
G3bp1	0.0451	-12.5	no	-0.418441	0.00345432	grey
G3bp2	-0.00711	-309	no	-0.178406	0.215626	grey
G4	-0.154	-9.6	no	0.0301935	0.924857	grey
Gab1	-0.219	-58.2	no	0.126871	0.511711	grey
Gab2	-0.379	-26.8	no	0.233766	0.0917287	grey
Gabarapl1	0.188	#NAME?	no	0.0122419	0.938674	grey
Gabbr1	0.908	-11.8	no	-0.00472031	0.979974	grey
Gabpa	0.938	-6.4	no	-0.356635	0.0488667	grey
Gabpb2	0.0997	-40.8	no	-0.0402866	0.812212	grey
Gadd45a	-0.0268	-95.7	no	0.507546	0.101439	grey
Gadd45b	0.767	-13.4	no	2.49459	1.15e-09	grey
Gadd45g	0.299	-157	no	-0.03047	0.911326	grey
Gadd45gip1	-0.623	-167	no	-0.363488	0.0556306	grey
Gal3st4	-1.22	-1.85	no	0.153865	0.679506	grey
Galnt1	1.06	-58.5	no	0.829013	3.05e-06	grey
Galnt15	-0.791	-14.9	no	-0.436348	0.107944	grey
Galnt4	0.663	-6.44	no	-0.0298228	0.925471	grey
Galnt7	-0.869	-16.4	no	-0.0388587	0.897237	grey
Gap43	1.96	-19.2	no	1.32712	0.29872	grey
Gapdh	-0.0826	-134	no	-0.353423	0.480193	grey
Gar1	2.17	-25	no	0.418662	0.50651	grey
Gars	0.558	-141	no	0.682959	2.53e-05	grey
Gas2l1	-0.0902	-16.2	no	0.59858	0.000114397	grey
Gas6	-0.0423	-129	no	0.101466	0.61083	grey
Gas7	-0.529	-182	no	1.23452	4.2e-18	grey
Gas8	-0.393	-25.8	no	-0.407522	0.252688	grey
Gata6	-0.239	-43	no	-0.57947	0.00110027	grey
Gatad1	0.364	-17.1	no	0.140655	0.434916	grey
Gatad2a	-0.334	-69.6	no	0.308717	0.0355488	grey
Gatad2b	0.0814	-41.5	no	-0.0465945	0.753923	grey
Gatb	-0.605	-7.93	no	-0.244315	0.444381	grey
Gba	1.36	-13	no	0.813638	1.57e-05	grey
Gbas	-0.489	-8.47	no	-0.906003	0.0187274	grey
Gbf1	0.787	-7.15	no	-0.100216	0.491895	grey
Gbp1	-1.76	-17.1	no	-1.49865	0.278349	grey
Gbp2	0.413	-251	no	0.453893	0.0316974	grey
Gbp4	-0.631	-5.61	no	1.07476	0.160238	grey
Gbp5	-0.225	-35.1	no	0.581091	0.0998309	grey
Gcc1	-1.06	-22.4	no	0.31504	0.157843	grey
Gcc2	-0.111	-84.8	no	-0.43499	0.00267899	grey
Gcdh	-0.595	-89.5	no	-0.750069	1.3e-05	grey
Gclc	0.193	-7.18	no	-0.0933329	0.720549	grey
Gcnt1	-1.13	-2.76	no	1.22587	0.000922052	grey
Gdf11	-0.406	-153	no	0.476731	0.105927	grey
Gdf6	-0.688	-6.68	no	3.81266	1.28e-22	grey
Gdi1	-0.46	-90	no	-0.410236	0.00474131	grey
Gdi2	0.335	-199	no	0.152814	0.212712	grey
Gem	-0.175	-59.9	no	-0.495199	0.0394647	grey
Gemin4	2.32	-3.97	no	-0.00336548	0.990798	grey
Gemin5	-0.126	-3.88	no	0.0350559	0.894066	grey
Gemin6	0.735	-3.91	no	-0.697359	0.0814808	grey
Gfap	0.89	-3.61	no	-1.69118	0.00490643	grey
Gfm1	-0.0811	-34	no	-0.383189	0.166415	grey
Gfod1	3.46	-2.66	no	1.0391	4.13e-06	grey
Gfod2	0.558	-9.1	no	0.199899	0.512624	grey
Gfra1	2.15	-11.7	no	-1.00602	3.77e-05	grey
[truncated: 3,899 more rows]
