# Supplementary material for: Transcriptome-Wide N6-Methyladenosine Alternations in Pulmonary Arteries of Monocrotaline-Induced Pulmonary Arterial Hypertension in Rats and Novel Therapeutic Targets
Source: Biomedicines. 2024 Feb 4;12(2):364. doi: 10.3390/biomedicines12020364 (PMC10886831; doi:10.3390/biomedicines12020364)
Supplement: Supplementary file 1 [file biomedicines-12-00364-s001.zip › Supplemental Table S4.xlsx]

## Sheet: Sheet1
ID	Gene.symbol	Gene.title	log2(fold change)	#NAME?
8102800	SLC7A11	solute carrier family 7 member 11	2.631	5.867
7971077	POSTN	periostin	2.496	4.417
8057056	TTN	titin	2.243	5.607
7951246	MMP8	matrix metallopeptidase 8	2.041	3.448
7919314	FMO5	flavin containing monooxygenase 5	1.918	5.643
8057377	CCDC141	coiled-coil domain containing 141	1.912	5.187
8146957	PI15	peptidase inhibitor 15	1.9	4.535
8048864	CCL20	C-C motif chemokine ligand 20	1.892	2.617
7970864	HSPH1	heat shock protein family H (Hsp110) member 1	1.87	4.1
7902495	NEXN	nexilin F-actin binding protein	1.802	7.646
7960794	CD163	CD163 molecule	1.789	5.864
8103722	HSP90AA6P	heat shock protein 90 alpha family class A member 6, pseudogene	1.759	5.821
7917771	DNTTIP2	deoxynucleotidyltransferase terminal interacting protein 2	1.727	6.282
7936419	CCDC186	coiled-coil domain containing 186	1.714	7.31
8095680	CXCL8	C-X-C motif chemokine ligand 8	1.705	2.497
8059710	SNORD20	small nucleolar RNA, C/D box 20	1.7	4.564
8083709	SMC4	structural maintenance of chromosomes 4	1.689	7.738
7995258	ZNF267	zinc finger protein 267	1.667	5.487
7981335	HSP90AA1	heat shock protein 90 alpha family class A member 1	1.63	5.187
8021635	SERPINB2	serpin family B member 2	1.622	2.54
8169504	SLC6A14	solute carrier family 6 member 14	1.614	4.024
8088560	ADAMTS9	ADAM metallopeptidase with thrombospondin type 1 motif 9	1.602	3.552
7983663	USP8	ubiquitin specific peptidase 8	1.596	8.158
7983763	MAPK6	mitogen-activated protein kinase 6	1.589	7.285
8085628	ANKRD28	ankyrin repeat domain 28	1.579	4.655
8058052	HSPD1	heat shock protein family D (Hsp60) member 1	1.568	5.079
8044236	GCC2	GRIP and coiled-coil domain containing 2	1.562	6.65
8047401	CFLAR	CASP8 and FADD like apoptosis regulator	1.54	7.558
8121949	LAMA2	laminin subunit alpha 2	1.535	5.44
7903092	FNBP1L	formin binding protein 1 like	1.531	5.886
7947245	HSP90AA2P	heat shock protein 90 alpha family class A member 2, pseudogene	1.531	5.701
7927936	DDX21	DEAD-box helicase 21	1.526	4.153
8050302	ROCK2	Rho associated coiled-coil containing protein kinase 2	1.523	7.598
8125919	FKBP5///LOC285847///FKBP5	FK506 binding protein 5///uncharacterized LOC285847///FK506 binding protein 5	1.499	3.033
7943413	BIRC3	baculoviral IAP repeat containing 3	1.495	3.734
8081069	ZNF654	zinc finger protein 654	1.488	7.045
8098758	ZNF721	zinc finger protein 721	1.484	6.573
8149071	ANGPT2	angiopoietin 2	1.476	3.92
8030978	ZNF845	zinc finger protein 845	1.476	5.609
7908459	CFH	complement factor H	1.468	5.226
8020903	GALNT1	polypeptide N-acetylgalactosaminyltransferase 1	1.468	8.729
7922598	ANGPTL1	angiopoietin like 1	1.458	6.977
8089930	GOLGB1	golgin B1	1.455	7.06
7958174	TXNRD1	thioredoxin reductase 1	1.454	4.327
8056222	DPP4	dipeptidyl peptidase 4	1.451	5.023
8006112	NSRP1	nuclear speckle splicing regulatory protein 1	1.445	7.5
8096415	MMRN1	multimerin 1	1.442	3.168
7950983	CHORDC1	cysteine and histidine rich domain containing 1	1.44	4.845
8142307	PNPLA8	patatin like phospholipase domain containing 8	1.435	5.837
7922912	TPR	translocated promoter region, nuclear basket protein	1.433	6.322
7933877	JMJD1C	jumonji domain containing 1C	1.428	5.565
7939314	EHF	ETS homologous factor	1.423	6.476
8042830	MTHFD2	methylenetetrahydrofolate dehydrogenase (NADP+ dependent) 2, methenyltetrahydrofolate cyclohydrolase	1.416	4.241
8174893	THOC2	THO complex 2	1.404	5.754
8127841	PGM3	phosphoglucomutase 3	1.399	4.648
8022441	ROCK1	Rho associated coiled-coil containing protein kinase 1	1.397	7.679
8088700	TMF1	TATA element modulatory factor 1	1.396	6.321
8035842	ZNF91	zinc finger protein 91	1.395	7.188
8113305	CHD1	chromodomain helicase DNA binding protein 1	1.394	5.538
7976814	SNORD114-2	small nucleolar RNA, C/D box 114-2	1.392	3.705
8068062	USP16	ubiquitin specific peptidase 16	1.389	7.756
7965436	EEA1	early endosome antigen 1	1.383	6.928
7934898	ANKRD22	ankyrin repeat domain 22	1.373	3.661
7925525	CEP170	centrosomal protein 170	1.373	5.537
8095773	USO1	USO1 vesicle transport factor	1.371	6.746
7922229	SELE	selectin E	1.37	2.42
8053741	ANKRD20A8P///ANKRD20A4///ANKRD20A2///ANKRD20A3///ANKRD20A5P///ANKRD20A1	ankyrin repeat domain 20 family member A8, pseudogene///ankyrin repeat domain 20 family member A4///ankyrin repeat domain 20 family member A2///ankyrin repeat domain 20 family member A3///ankyrin repeat domain 20 family member A5, pseudogene///ankyrin repeat domain 20 family member A1	1.368	4.999
8106354	IQGAP2	IQ motif containing GTPase activating protein 2	1.367	5.564
7936614	EIF3A	eukaryotic translation initiation factor 3 subunit A	1.361	5.606
8120441	PHF3	PHD finger protein 3	1.361	5.339
8103951	ACSL1	acyl-CoA synthetase long-chain family member 1	1.353	3.73
7962212	PKP2	plakophilin 2	1.351	4.584
8113157	TTC37	tetratricopeptide repeat domain 37	1.349	5.023
7986250	CHD2	chromodomain helicase DNA binding protein 2	1.348	7.279
8107942	RAD50	RAD50 double strand break repair protein	1.348	5.604
8142975	MIR29A	microRNA 29a	1.345	4.249
8097480	NAA15	N(alpha)-acetyltransferase 15, NatA auxiliary subunit	1.345	5.777
8134122	AKAP9	A-kinase anchoring protein 9	1.344	6.087
8043861	EIF5B	eukaryotic translation initiation factor 5B	1.344	6.289
7907171	BLZF1	basic leucine zipper nuclear factor 1	1.343	5.72
8047300	AOX1	aldehyde oxidase 1	1.342	3.514
8040440	GEN1	GEN1, Holliday junction 5' flap endonuclease	1.333	6.577
7965064	OSBPL8	oxysterol binding protein like 8	1.331	6.874
8097991	TDO2	tryptophan 2,3-dioxygenase	1.33	2.983
7978595	BAZ1A	bromodomain adjacent to zinc finger domain 1A	1.329	5.257
8052149	PSME4	proteasome activator subunit 4	1.329	6.315
8078569	GOLGA4	golgin A4	1.326	6.403
8147891	PKHD1L1	polycystic kidney and hepatic disease 1 (autosomal recessive)-like 1	1.326	2.77
8163107	MIR32	microRNA 32	1.324	3.329
7930422	SMC3	structural maintenance of chromosomes 3	1.32	6.675
7962590	RPAP3	RNA polymerase II associated protein 3	1.317	7.35
8043981	IL1R2	interleukin 1 receptor type 2	1.315	3.047
8101659	SPARCL1	SPARC like 1	1.314	4.669
8054064	ANKRD36B	ankyrin repeat domain 36B	1.312	5.317
8041149	WDR43	WD repeat domain 43	1.31	5.164
8104930	SLC1A3	solute carrier family 1 member 3	1.308	3.909
7974483	KTN1	kinectin 1	1.306	5.981
8020779	DSG2	desmoglein 2	1.304	4.644
7958200	EID3	EP300 interacting inhibitor of differentiation 3	1.302	3.687
7978776	MIS18BP1	MIS18 binding protein 1	1.3	5.562
8069553	NRIP1	nuclear receptor interacting protein 1	1.298	4.769
7965123	PPP1R12A	protein phosphatase 1 regulatory subunit 12A	1.297	6.293
8140967	SAMD9	sterile alpha motif domain containing 9	1.297	3.846
8046848	ZC3H15	zinc finger CCCH-type containing 15	1.296	6.86
7901765	HOOK1	hook microtubule tethering protein 1	1.292	8.443
8107578	SRFBP1	serum response factor binding protein 1	1.291	7.442
8139832	ZNF117	zinc finger protein 117	1.291	5.17
8052269	CCDC88A	coiled-coil domain containing 88A	1.288	5.765
7993664	CCP110	centriolar coiled-coil protein 110	1.286	5.818
8144812	PCM1	pericentriolar material 1	1.282	5.941
7930276	SLK	STE20 like kinase	1.281	4.98
7956878	IRAK3	interleukin 1 receptor associated kinase 3	1.28	4.387
8138466	MACC1	metastasis associated in colon cancer 1	1.28	4.505
8172268	MIR222	microRNA 222	1.277	4.462
8059413	DOCK10	dedicator of cytokinesis 10	1.275	5.023
8055978	LOC100421561///FAM133CP///FAM133DP///FAM133B	family with sequence similarity 133 member B pseudogene///family with sequence similarity 133, member A pseudogene///family with sequence similarity 133, member A pseudogene///family with sequence similarity 133 member B	1.275	8.386
7954752	DNM1L	dynamin 1 like	1.274	6.327
7917433	ODF2L	outer dense fiber of sperm tails 2 like	1.269	6.879
8050443	SMC6	structural maintenance of chromosomes 6	1.268	6.242
7907790	CEP350	centrosomal protein 350	1.267	6.445
8135601	MET	MET proto-oncogene, receptor tyrosine kinase	1.266	5.632
7988605	COPS2	COP9 signalosome subunit 2	1.265	6.673
7971920	HNRNPA3///HNRNPA3P1	heterogeneous nuclear ribonucleoprotein A3///heterogeneous nuclear ribonucleoprotein A3 pseudogene 1	1.262	6.409
7924351	EPRS	glutamyl-prolyl-tRNA synthetase	1.259	6.067
7988581	SECISBP2L	SECIS binding protein 2 like	1.258	3.713
8005204	CCDC144CP///CCDC144NL///CCDC144B///CCDC144A	coiled-coil domain containing 144C, pseudogene///coiled-coil domain containing 144 family, N-terminal like///coiled-coil domain containing 144B (pseudogene)///coiled-coil domain containing 144A	1.255	2.269
8055913	PRPF40A	pre-mRNA processing factor 40 homolog A	1.25	6.405
7977058	EIF5	eukaryotic translation initiation factor 5	1.248	4.882
8129773	BCLAF1	BCL2 associated transcription factor 1	1.246	4.846
7925978	FAM208B	family with sequence similarity 208 member B	1.246	4.751
8130032	FBXO30	F-box protein 30	1.246	4.977
8129728	AHI1	Abelson helper integration site 1	1.245	4.734
8124307	CMAHP	cytidine monophospho-N-acetylneuraminic acid hydroxylase, pseudogene	1.244	3.11
8151559	SLC10A5	solute carrier family 10 member 5	1.244	6.516
8100378	RPL21P44	ribosomal protein L21 pseudogene 44	1.242	4.411
8059689	NCL	nucleolin	1.241	5.304
8166230	TXLNG	taxilin gamma	1.24	7.536
8120022	CDC5L	cell division cycle 5 like	1.238	5.932
8129134	ROS1///LRIG3///SLC34A2///ROS1	ROS proto-oncogene 1, receptor tyrosine kinase///leucine rich repeats and immunoglobulin like domains 3///solute carrier family 34 member 2///ROS proto-oncogene 1, receptor tyrosine kinase	1.238	4.227
8053737	LOC102725104///LOC101059935///ANKRD20A8P	putative ankyrin repeat domain-containing protein 20A12 pseudogene///ankyrin repeat domain-containing protein 18A-like///ankyrin repeat domain 20 family member A8, pseudogene	1.236	4.1
7974621	ARID4A	AT-rich interaction domain 4A	1.235	5.462
7932911	KIF5B///KIF5B	kinesin family member 5B///kinesin family member 5B	1.235	6.639
8056426	TTC21B	tetratricopeptide repeat domain 21B	1.235	5.233
8097098	USP53	ubiquitin specific peptidase 53	1.233	5.15
7951271	MMP1	matrix metallopeptidase 1	1.232	2.6
7952673	FLJ45950	FLJ45950 protein	1.231	3.97
8153935	ZNF252P	zinc finger protein 252, pseudogene	1.231	6.081
8043687	ANKRD36	ankyrin repeat domain 36	1.23	6.556
8171006	BRCC3	BRCA1/BRCA2-containing complex subunit 3	1.23	6.459
8084844	OPA1	OPA1, mitochondrial dynamin like GTPase	1.23	6.666
8044049	IL18RAP	interleukin 18 receptor accessory protein	1.229	3.463
8104838	DNAJC21	DnaJ heat shock protein family (Hsp40) member C21	1.227	7.016
8080419	GNL3	G protein nucleolar 3	1.224	3.925
8054712	IL1A	interleukin 1 alpha	1.224	2.877
8115606	SLU7	SLU7 homolog, splicing factor	1.224	6.114
7922408	SNORD78	small nucleolar RNA, C/D box 78	1.221	4.113
7987145	FMN1	formin 1	1.22	5.869
7946815	PIK3C2A	phosphatidylinositol-4-phosphate 3-kinase catalytic subunit type 2 alpha	1.218	5.218
7969651	DNAJC3	DnaJ heat shock protein family (Hsp40) member C3	1.215	5.191
8162147	ZCCHC6	zinc finger CCHC-type containing 6	1.215	5.277
8035808	ZNF100	zinc finger protein 100	1.212	6.757
7954382	PYROXD1	pyridine nucleotide-disulphide oxidoreductase domain 1	1.211	6.738
8106743	VCAN	versican	1.211	2.788
7989885	LOC646358///DNAJB14	DnaJ heat shock protein family (Hsp40) member B14 pseudogene///DnaJ heat shock protein family (Hsp40) member B14	1.21	8.206
8132318	ANLN	anillin actin binding protein	1.208	7.273
8062603	TOP1	topoisomerase (DNA) I	1.208	6.391
7999841	SMG1	SMG1, nonsense mediated mRNA decay associated PI3K related kinase	1.207	4.847
7999752	LYRM2///ZC3H11A	LYR motif containing 2///zinc finger CCCH-type containing 11A	1.206	4.825
7971967	DIS3	DIS3 homolog, exosome endoribonuclease and 3'-5' exoribonuclease	1.205	5.485
8096176	PTPN13	protein tyrosine phosphatase, non-receptor type 13	1.202	4.366
8122440	LTV1	LTV1 ribosome biogenesis factor	1.2	6.388
7925622	AHCTF1P1///AHCTF1	AT-hook containing transcription factor 1 pseudogene 1///AT-hook containing transcription factor 1	1.198	5.731
7921344	ELL2	elongation factor for RNA polymerase II 2	1.198	3.189
7965200	CCDC59	coiled-coil domain containing 59	1.195	7.953
7933084	NAMPT	nicotinamide phosphoribosyltransferase	1.195	3.319
8041015	SLC4A1AP	solute carrier family 4 member 1 adaptor protein	1.194	7.854
8131975	TAX1BP1	Tax1 binding protein 1	1.194	6.362
8155770	SMC5	structural maintenance of chromosomes 5	1.193	5.535
8099860	RFC1	replication factor C subunit 1	1.187	4.907
7908488	CFHR1	complement factor H related 1	1.185	6.192
8058552	IDH1	isocitrate dehydrogenase (NADP(+)) 1, cytosolic	1.185	5.641
7995583	CHD9	chromodomain helicase DNA binding protein 9	1.183	5.499
7974851	HIF1A	hypoxia inducible factor 1 alpha subunit	1.182	4.63
8162352	NOL8	nucleolar protein 8	1.182	5.377
8172056	RPGR	retinitis pigmentosa GTPase regulator	1.182	4.494
8106141	FCHO2	FCH domain only 2	1.18	6.236
8140971	SAMD9L	sterile alpha motif domain containing 9 like	1.18	3.249
8150757	RB1CC1	RB1 inducible coiled-coil 1	1.179	5.78
8049016	PSMD1	proteasome 26S subunit, non-ATPase 1	1.178	5.102
8078272	NR1D2	nuclear receptor subfamily 1 group D member 2	1.176	3.446
8069541	SAMSN1	SAM domain, SH3 domain and nuclear localization signals 1	1.176	3.228
8152668	ATAD2	ATPase family, AAA domain containing 2	1.168	6.73
7926410	MRC1	mannose receptor, C type 1	1.165	4.067
7958130	HSP90B1	heat shock protein 90 beta family member 1	1.161	4.984
7968678	FREM2	FRAS1 related extracellular matrix protein 2	1.158	3.926
7961900	ITPR2	inositol 1,4,5-trisphosphate receptor type 2	1.157	5.493
7915015	GNL2	G protein nucleolar 2	1.156	5.031
8028186	ZNF146	zinc finger protein 146	1.155	5.293
8129071	FRK	fyn related Src family tyrosine kinase	1.154	5.28
7946703	COPB1	coatomer protein complex subunit beta 1	1.153	5.64
7902977	KIAA1107	KIAA1107	1.153	4.615
7970681	RNF6	ring finger protein 6	1.152	5.274
8171449	ACE2	angiotensin I converting enzyme 2	1.151	5.165
8151592	CA1	carbonic anhydrase 1	1.15	2.83
8099410	BOD1L1	biorientation of chromosomes in cell division 1 like 1	1.149	5.738
7971422	ZC3H13	zinc finger CCCH-type containing 13	1.147	6.577
8100428	CLOCK	clock circadian regulator	1.144	6.164
8091141	XRN1	5'-3' exoribonuclease 1	1.144	5.494
7980861	CATSPERB	cation channel sperm associated auxiliary subunit beta	1.142	4.731
8166876	DDX3X	DEAD-box helicase 3, X-linked	1.142	4.474
8142554	AASS	aminoadipate-semialdehyde synthase	1.139	4.239
8082940	ARMC8	armadillo repeat containing 8	1.139	7.304
8128472	ASCC3	activating signal cointegrator 1 complex subunit 3	1.139	5.161
8106280	HMGCR	3-hydroxy-3-methylglutaryl-CoA reductase	1.139	3.219
8160088	MPDZ	multiple PDZ domain crumbs cell polarity complex component	1.139	4.592
8151711	NBN	nibrin	1.139	6.92
8096733	SGMS2	sphingomyelin synthase 2	1.139	2.768
8168691	DIAPH2	diaphanous related formin 2	1.138	6.455
8169750	STAG2	stromal antigen 2	1.138	6.148
8047339	BZW1	basic leucine zipper and W2 domains 1	1.137	5.762
7961546	EPS8	epidermal growth factor receptor pathway substrate 8	1.137	5.711
8152041	RNF19A	ring finger protein 19A, RBR E3 ubiquitin protein ligase	1.137	5.489
8142452	TFEC	transcription factor EC	1.135	6.154
8052762	GFPT1	glutamine--fructose-6-phosphate transaminase 1	1.133	5.59
8163839	C5	complement component 5	1.132	5.362
8159854	PUM3	pumilio RNA binding family member 3	1.13	4.36
7954810	LRRK2	leucine rich repeat kinase 2	1.129	2.504
8144786	SLC7A2	solute carrier family 7 member 2	1.129	5.269
8091562	DHX36	DEAH-box helicase 36	1.127	5.704
7957186	TBC1D15	TBC1 domain family member 15	1.126	5.638
7954511	STK38L	serine/threonine kinase 38 like	1.125	5.796
8130211	SYNE1	spectrin repeat containing nuclear envelope protein 1	1.122	4.632
8121277	AIM1	absent in melanoma 1	1.121	4.623
7975224	EIF2S1	eukaryotic translation initiation factor 2 subunit alpha	1.121	4.836
7970954	DCLK1	doublecortin like kinase 1	1.118	3.702
7938313	IPO7	importin 7	1.118	5.642
8103601	DDX60L	DEAD-box helicase 60-like	1.117	3.356
8103932	CENPU	centromere protein U	1.116	3.716
8160297	PLIN2	perilipin 2	1.116	3.133
8046975	WDR75	WD repeat domain 75	1.115	6.148
8173615	RLIM	ring finger protein, LIM domain interacting	1.114	5.232
8102594	TNIP3	TNFAIP3 interacting protein 3	1.114	2.557
8173673	ATRX	ATRX, chromatin remodeler	1.113	5.491
8056184	ITGB6///ITGB6	integrin subunit beta 6///integrin subunit beta 6	1.113	5.668
7965022	KRR1	KRR1, small subunit processome component homolog	1.112	6.844
8045539	KYNU	kynureninase	1.111	3.943
7951351	PDGFD	platelet derived growth factor D	1.111	3.32
7938448	USP47	ubiquitin specific peptidase 47	1.111	5.376
8174474	ACSL4	acyl-CoA synthetase long-chain family member 4	1.11	3.879
8107208	FER	FER tyrosine kinase	1.11	6.056
8052443	USP34	ubiquitin specific peptidase 34	1.11	6.131
7962274	KIF21A	kinesin family member 21A	1.108	4.709
8047518	NOP58	NOP58 ribonucleoprotein	1.108	5.717
8091048	COPB2	coatomer protein complex subunit beta 2	1.106	4.409
8083569	TIPARP	TCDD inducible poly(ADP-ribose) polymerase	1.106	3.795
7908022	DHX9	DEAH-box helicase 9	1.105	4.996
7965964	SLC41A2	solute carrier family 41 member 2	1.105	5.087
8163275	KIAA0368	KIAA0368	1.104	4.706
8097647	ABCE1	ATP binding cassette subfamily E member 1	1.102	5.145
8053834	ANKRD36///ANKRD36B	ankyrin repeat domain 36///ankyrin repeat domain 36B	1.102	4.527
8161415	LOC101059935///ANKRD20A8P	ankyrin repeat domain-containing protein 18A-like///ankyrin repeat domain 20 family member A8, pseudogene	1.102	3.799
8051882	LRPPRC	leucine rich pentatricopeptide repeat containing	1.101	5.048
8127234	DST	dystonin	1.1	4.831
8113064	LYSMD3	LysM domain containing 3	1.1	6.246
8044263	RANBP2	RAN binding protein 2	1.1	7.188
8082688	DNAJC13	DnaJ heat shock protein family (Hsp40) member C13	1.099	3.938
7989253	SLTM	SAFB like transcription modulator	1.099	6.944
8044745	DDX18	DEAD-box helicase 18	1.098	4.776
7969703	IPO5	importin 5	1.098	5.095
8105267	ITGA2	integrin subunit alpha 2	1.097	2.125
8125941	SRPK1	SRSF protein kinase 1	1.097	4.945
8102720	ANKRD50	ankyrin repeat domain 50	1.094	4.578
8014574	DDX52	DEAD-box helicase 52	1.093	5.316
8085815	TOP2B	topoisomerase (DNA) II beta	1.093	5.093
8173135	ALAS2	5'-aminolevulinate synthase 2	1.092	3.406
7935146	NOC3L	NOC3 like DNA replication regulator	1.092	4.419
8111941	HMGCS1	3-hydroxy-3-methylglutaryl-CoA synthase 1	1.09	2.982
7938687	NUCB2	nucleobindin 2	1.09	6.395
8164701	SETX	senataxin	1.089	5.061
7961710	ABCC9	ATP binding cassette subfamily C member 9	1.088	3.506
8055021	IWS1	IWS1, SUPT6H interacting protein	1.088	6.26
8014974	TOP2A	topoisomerase (DNA) II alpha	1.088	5.925
7939197	HIPK3	homeodomain interacting protein kinase 3	1.087	4.649
7974920	SYNE2	spectrin repeat containing nuclear envelope protein 2	1.087	4.479
8116760	RIOK1	RIO kinase 1	1.086	6.016
8122464	UTRN	utrophin	1.086	4.607
8120992	ZNF292	zinc finger protein 292	1.086	4.481
8151871	CCNE2	cyclin E2	1.085	5.065
8148070	COL14A1	collagen type XIV alpha 1 chain	1.085	2.275
8095269	POLR2B	RNA polymerase II subunit B	1.085	5.105
8096938	LARP7///ZGRF1///LARP7	La ribonucleoprotein domain family member 7///zinc finger GRF-type containing 1///La ribonucleoprotein domain family member 7	1.084	5.861
8160016	RANBP6	RAN binding protein 6	1.084	6.085
8041138	SPDYA	speedy/RINGO cell cycle regulator family member A	1.084	3.394
8008834	CLTC	clathrin heavy chain	1.083	4.927
8068522	TTC3	tetratricopeptide repeat domain 3	1.083	5.294
8173766	BRWD3	bromodomain and WD repeat domain containing 3	1.082	6.9
8112182	MIER3	MIER family member 3	1.082	5.987
7942839	PCF11	PCF11 cleavage and polyadenylation factor subunit	1.082	4.885
8161945	RASEF	RAS and EF-hand domain containing	1.082	4.276
8140709	KIAA1324L	KIAA1324 like	1.081	3.903
8030980	ZNF761///ZNF525///ZNF845///ZNF765	zinc finger protein 761///zinc finger protein 525///zinc finger protein 845///zinc finger protein 765	1.081	5.004
8083146	PLS1	plastin 1	1.08	6.89
7993756	ACSM3	acyl-CoA synthetase medium-chain family member 3	1.079	3.594
8104350	ICE1	interactor of little elongation complex ELL subunit 1	1.079	4.92
8089596	CFAP44	cilia and flagella associated protein 44	1.078	4.381
8168412	JPX	JPX transcript, XIST activator (non-protein coding)	1.078	4.841
8106303	POLK	DNA polymerase kappa	1.078	4.629
8110032	CREBRF	CREB3 regulatory factor	1.075	6.107
8085954	AZI2	5-azacytidine induced 2	1.074	7.126
8113469	PJA2	praja ring finger ubiquitin ligase 2	1.074	6.29
7929201	BTAF1	B-TFIID TATA-box binding protein associated factor 1	1.073	4.554
8147244	NECAB1	N-terminal EF-hand calcium binding protein 1	1.073	3.615
7969243	CKAP2	cytoskeleton associated protein 2	1.072	5.417
7965264	CEP290	centrosomal protein 290	1.071	6.228
8111019	DNAH5	dynein axonemal heavy chain 5	1.071	2.4
8114455	HSPA9	heat shock protein family A (Hsp70) member 9	1.071	4.271
7957806	SCYL2	SCY1 like pseudokinase 2	1.071	6.702
8107613	SNX2	sorting nexin 2	1.07	5.631
7977674	SUPT16H	SPT16 homolog, facilitates chromatin remodeling subunit	1.07	5.187
8059596	TRIP12	thyroid hormone receptor interactor 12	1.07	4.346
8046895	FAM171B	family with sequence similarity 171 member B	1.069	7.149
8097148	KIAA1109	KIAA1109	1.068	3.898
7974066	PNN	pinin, desmosome associated protein	1.068	7.091
8020468	RBBP8	RB binding protein 8, endonuclease	1.067	7.739
8156935	ZNF189	zinc finger protein 189	1.067	6.554
7968577	NBEA	neurobeachin	1.066	4.969
8084206	B3GNT5	UDP-GlcNAc:betaGal beta-1,3-N-acetylglucosaminyltransferase 5	1.065	2.99
8020068	ANKRD12	ankyrin repeat domain 12	1.064	6.314
8135955	CALU	calumenin	1.064	4.465
8135497	ZNF277	zinc finger protein 277	1.064	7.121
8105714	SREK1	splicing regulatory glutamic acid and lysine rich protein 1	1.063	7.155
7980923	TRIP11	thyroid hormone receptor interactor 11	1.063	4.858
8135532	LSMEM1	leucine rich single-pass membrane protein 1	1.062	3.582
8104944	NIPBL	NIPBL, cohesin loading factor	1.062	5.493
8104788	RAI14	retinoic acid induced 14	1.061	4.82
8152148	UBR5	ubiquitin protein ligase E3 component n-recognin 5	1.06	4.137
8169541	DOCK11	dedicator of cytokinesis 11	1.059	4.242
7986010	IQGAP1	IQ motif containing GTPase activating protein 1	1.059	4.606
8136347	CALD1	caldesmon 1	1.058	4.378
7943126	CEP295	centrosomal protein 295	1.056	4.542
8171418	PIGA	phosphatidylinositol glycan anchor biosynthesis class A	1.056	3.639
7956795	TBK1	TANK binding kinase 1	1.056	6.001
7964937	ZFC3H1	zinc finger C3H1-type containing	1.056	5.505
7932554	ARHGAP21	Rho GTPase activating protein 21	1.055	4.957
7984540	KIF23	kinesin family member 23	1.055	6.478
8138381	AGR2	anterior gradient 2, protein disulphide isomerase family member	1.053	4.08
7961829	BCAT1	branched chain amino acid transaminase 1	1.053	3.81
7931226	ZRANB1	zinc finger RANBP2-type containing 1	1.053	6.061
7972069	MYCBP2	MYC binding protein 2, E3 ubiquitin protein ligase	1.049	4.489
8091678	VEPH1	ventricular zone expressed PH domain containing 1	1.049	3.54
8142646	IQUB	IQ motif and ubiquitin domain containing	1.048	2.458
8175369	MAP7D3	MAP7 domain containing 3	1.048	5.97
7999520	RSL1D1	ribosomal L1 domain containing 1	1.048	5.463
8057394	SESTD1	SEC14 and spectrin domain containing 1	1.047	4.895
8026007	ZNF791	zinc finger protein 791	1.047	5.1
8084146	FXR1	FMR1 autosomal homolog 1	1.046	5.597
8081171	CRYBG3	crystallin beta-gamma domain containing 3	1.045	4.412
8090988	CEP70	centrosomal protein 70	1.044	4.355
8146243	HOOK3	hook microtubule tethering protein 3	1.042	7.53
8109830	SPDL1	spindle apparatus coiled-coil protein 1	1.042	6.003
7906863	UAP1	UDP-N-acetylglucosamine pyrophosphorylase 1	1.042	2.99
8068105	BACH1	BTB domain and CNC homolog 1	1.041	3.956
8105353	SKIV2L2	Ski2 like RNA helicase 2	1.041	5.29
7988467	FBN1	fibrillin 1	1.04	2.634
7956670	USP15	ubiquitin specific peptidase 15	1.04	5.88
8034390	ZNF799	zinc finger protein 799	1.04	5.59
8154233	CD274	CD274 molecule	1.039	3.012
8120552	FAM135A	family with sequence similarity 135 member A	1.039	5.397
8148358	PHF20L1	PHD finger protein 20-like 1	1.038	5.999
8038993	ZNF28	zinc finger protein 28	1.038	5.954
8166500	ZFX	zinc finger protein, X-linked	1.037	6.43
8058591	ACADL	acyl-CoA dehydrogenase, long chain	1.035	3.184
7974447	SOCS4	suppressor of cytokine signaling 4	1.034	6.304
7927267	FAM35DP///FAM35BP///FAM35A	family with sequence similarity 35, member A pseudogene///family with sequence similarity 35, member A pseudogene///family with sequence similarity 35 member A	1.033	5.089
7973918	FAM177A1	family with sequence similarity 177 member A1	1.032	6.42
7967420	SBNO1	strawberry notch homolog 1	1.032	7.146
8091764	KPNA4	karyopherin subunit alpha 4	1.031	5.204
8038949	ZNF841	zinc finger protein 841	1.031	3.972
8129379	ECHDC1	ethylmalonyl-CoA decarboxylase 1	1.029	6.205
8127787	IBTK	inhibitor of Bruton tyrosine kinase	1.029	6.087
8155946	VPS13A	vacuolar protein sorting 13 homolog A	1.029	5.166
8095230	SRP72	signal recognition particle 72	1.028	4.529
8142585	CADPS2	calcium dependent secretion activator 2	1.027	4.84
8043043	DNAH6	dynein axonemal heavy chain 6	1.027	1.929
8091972	MECOM	MDS1 and EVI1 complex locus	1.027	5.429
8180359	PDE4DIP	phosphodiesterase 4D interacting protein	1.026	3.522
7970999	SPG20	spastic paraplegia 20 (Troyer syndrome)	1.024	5.26
8090772	TOPBP1	topoisomerase (DNA) II binding protein 1	1.024	5.614
8102328	CFI	complement factor I	1.022	5.964
8155673	PIP5K1B	phosphatidylinositol-4-phosphate 5-kinase type 1 beta	1.022	4.446
8131292	RBAK	RB associated KRAB zinc finger	1.022	5.468
8056457	SCN1A	sodium voltage-gated channel alpha subunit 1	1.022	3.51
8030993	ZNF761	zinc finger protein 761	1.022	6.591
7939902	LOC646813	DEAH-box helicase 9 pseudogene	1.021	5.314
8129618	VNN1	vanin 1	1.021	2.926
8050719	ITSN2	intersectin 2	1.02	5.157
8133914	DMTF1	cyclin D binding myb like transcription factor 1	1.019	5.04
8106098	MAP1B	microtubule associated protein 1B	1.019	4.044
7906400	IFI16	interferon gamma inducible protein 16	1.018	4.072
8149500	MTUS1	microtubule associated tumor suppressor 1	1.018	4.623
8113286	RIOK2	RIO kinase 2	1.018	5.623
8084173	ATP11B	ATPase phospholipid transporting 11B (putative)	1.017	5.678
7927854	HNRNPH3	heterogeneous nuclear ribonucleoprotein H3	1.017	5.848
8045933	TANK	TRAF family member associated NFKB activator	1.017	6.379
8135464	DLD	dihydrolipoamide dehydrogenase	1.016	6.315
8135514	IFRD1	interferon related developmental regulator 1	1.016	4.549
7971965	LOC100129884///LOC100129884	uncharacterized LOC100129884///uncharacterized LOC100129884	1.016	6.677
8113881	RAPGEF6	Rap guanine nucleotide exchange factor 6	1.016	5.981
7922889	IVNS1ABP	influenza virus NS1A binding protein	1.015	3.479
8101304	RASGEF1B	RasGEF domain family member 1B	1.015	3.111
8016745	SPAG9	sperm associated antigen 9	1.015	5.717
8039054	ZNF347	zinc finger protein 347	1.015	4.897
8053668	EIF2AK3	eukaryotic translation initiation factor 2 alpha kinase 3	1.014	4.74
8166140	MOSPD2	motile sperm domain containing 2	1.014	4.198
8122058	ARG1	arginase 1	1.013	2.296
8069532	HSPA13	heat shock protein family A (Hsp70) member 13	1.013	4.612
8059279	EPHA4	EPH receptor A4	1.012	4.827
8058024	SF3B1	splicing factor 3b subunit 1	1.012	4.95
8122807	AKAP12	A-kinase anchoring protein 12	1.01	4.081
7943690	DDX10	DEAD-box helicase 10	1.01	5.185
7935027	IDE	insulin degrading enzyme	1.01	5.866
8124498	ZNF204P	zinc finger protein 204, pseudogene	1.01	4.049
8046759	DNAJC10	DnaJ heat shock protein family (Hsp40) member C10	1.009	5.707
8116910	HIVEP1	human immunodeficiency virus type I enhancer binding protein 1	1.009	4.663
7917604	ZNF644	zinc finger protein 644	1.009	6.767
8096296	HSP90AB3P	heat shock protein 90 alpha family class B member 3, pseudogene	1.008	5.071
8084794	IL1RAP	interleukin 1 receptor accessory protein	1.008	2.934
7951038	SNORA40///TAF1D	small nucleolar RNA, H/ACA box 40///TATA-box binding protein associated factor, RNA polymerase I subunit D	1.007	3.122
7943890	LOC100132686	uncharacterized LOC100132686	1.006	5.202
7929719	R3HCC1L	R3H domain and coiled-coil containing 1 like	1.006	5.517
7979698	ATP6V1D	ATPase H+ transporting V1 subunit D	1.005	4.767
8095080	PDGFRA	platelet derived growth factor receptor alpha	1.005	3.274
7930470	SHOC2	SHOC2, leucine rich repeat scaffold protein	1.005	7.058
8092849	ATP13A3	ATPase 13A3	1.003	4.443
7956910	CAND1	cullin associated and neddylation dissociated 1	1.003	5.115
8123744	F13A1	coagulation factor XIII A chain	1.003	3.612
8057486	PDE1A	phosphodiesterase 1A	1.003	2.751
7967255	CLIP1	CAP-Gly domain containing linker protein 1	1.002	5.582
8145702	WRN	Werner syndrome RecQ like helicase	1.001	7.816
7969881	TPP2	tripeptidyl peptidase 2	1	5.007
8156982	SMC2	structural maintenance of chromosomes 2	0.999	5.217
8105136	ZNF131	zinc finger protein 131	0.999	7.662
8141898	DNAJC2	DnaJ heat shock protein family (Hsp40) member C2	0.998	6.198
8087951	PBRM1	polybromo 1	0.998	5.166
7962499	SCAF11	SR-related CTD associated factor 11	0.998	5.181
7975068	ZBTB1	zinc finger and BTB domain containing 1	0.998	6.345
7903049	CCDC18	coiled-coil domain containing 18	0.997	5.083
8040386	DDX1	DEAD/H-box helicase 1	0.997	4.613
8042144	REL	REL proto-oncogene, NF-kB subunit	0.997	4.491
8129231	FAM184A	family with sequence similarity 184 member A	0.996	4.401
8113097	KIAA0825	KIAA0825	0.996	5.044
7929258	KIF11	kinesin family member 11	0.996	5.855
8131479	MIOS	meiosis regulator for oocyte development	0.996	6.498
8151549	IMPA1	inositol monophosphatase 1	0.995	5.849
7922976	PTGS2	prostaglandin-endoperoxide synthase 2	0.995	2.186
8030831	ZNF175	zinc finger protein 175	0.995	4.992
8152477	RAD21	RAD21 cohesin complex component	0.994	5.177
8104760	TARS	threonyl-tRNA synthetase	0.994	4.595
7966851	TAOK3	TAO kinase 3	0.993	5.079
8045736	FMNL2	formin like 2	0.992	4.825
8006638	GGNBP2	gametogenetin binding protein 2	0.992	6.692
8107164	PPIP5K2	diphosphoinositol pentakisphosphate kinase 2	0.992	4.873
8106827	ADGRV1	adhesion G protein-coupled receptor V1	0.99	4.13
7972487	DOCK9	dedicator of cytokinesis 9	0.989	2.858
8100251	FRYL	FRY like transcription coactivator	0.989	3.349
8151149	ARFGEF1	ADP ribosylation factor guanine nucleotide exchange factor 1	0.988	5.371
8070557	ZBTB21	zinc finger and BTB domain containing 21	0.988	3.54
8157534	CNTRL	centriolin	0.987	6.125
8091954	GOLIM4	golgi integral membrane protein 4	0.987	5.16
7961693	LDHB	lactate dehydrogenase B	0.986	6.21
8084016	PIK3CA	phosphatidylinositol-4,5-bisphosphate 3-kinase catalytic subunit alpha	0.986	5.575
8105084	C7	complement component 7	0.985	3.102
8013908	NUFIP2	NUFIP2, FMR1 interacting protein 2	0.985	4.422
7927062	ZNF33A	zinc finger protein 33A	0.985	5.729
8038925	ZNF615	zinc finger protein 615	0.985	5.631
7914342	FABP3	fatty acid binding protein 3	0.984	2.228
7957043	FRS2	fibroblast growth factor receptor substrate 2	0.984	5.798
7910950	KMO	kynurenine 3-monooxygenase (kynurenine 3-hydroxylase)	0.984	3.308
8006123	CPD	carboxypeptidase D	0.983	4.363
7918768	DENND2C	DENN domain containing 2C	0.983	3.97
8020508	RIOK3	RIO kinase 3	0.983	5.742
7932041	UPF2	UPF2 regulator of nonsense transcripts homolog (yeast)	0.983	5.997
7981111	DICER1	dicer 1, ribonuclease III	0.982	3.711
8172266	MIR221	microRNA 221	0.982	2.391
8052654	PELI1	pellino E3 ubiquitin protein ligase 1	0.982	2.86
8150889	SDR16C5	short chain dehydrogenase/reductase family 16C, member 5	0.982	3.756
7954729	FGD4	FYVE, RhoGEF and PH domain containing 4	0.981	4.483
8048940	SP100	SP100 nuclear antigen	0.981	4.092
8094719	N4BP2	NEDD4 binding protein 2	0.98	5.925
8046213	UBR3	ubiquitin protein ligase E3 component n-recognin 3 (putative)	0.98	4.761
8045455	UBXN4	UBX domain protein 4	0.979	4.895
7989387	VPS13C	vacuolar protein sorting 13 homolog C	0.979	4.161
8106025	BDP1	B double prime 1, subunit of RNA polymerase III transcription initiation factor IIIB	0.978	6.517
8039034	ZNF160	zinc finger protein 160	0.977	6.144
8059393	CUL3	cullin 3	0.976	6.441
8088745	FRMD4B	FERM domain containing 4B	0.976	5.26
8020898	ZNF271P	zinc finger protein 271, pseudogene	0.976	4.84
8168447	PBDC1	polysaccharide biosynthesis domain containing 1	0.975	5.982
7933509	PGBD3///ERCC6	piggyBac transposable element derived 3///ERCC excision repair 6, chromatin remodeling factor	0.975	4.127
8096301	SPP1	secreted phosphoprotein 1	0.975	2.159
8148208	FAM91A1	family with sequence similarity 91 member A1	0.974	5.046
8045919	2023-03-07	membrane associated ring-CH-type finger 7	0.973	5.322
8120883	DOPEY1	dopey family member 1	0.973	3.988
8100798	SULT1B1	sulfotransferase family 1B member 1	0.973	2.843
8097903	TLR2	toll like receptor 2	0.972	3.559
7971620	KPNA3	karyopherin subunit alpha 3	0.971	6.923
8111698	RICTOR	RPTOR independent companion of MTOR complex 2	0.971	4.223
8135661	CFTR	cystic fibrosis transmembrane conductance regulator	0.967	3.356
7902269	SRSF11	serine and arginine rich splicing factor 11	0.967	5.206
8121161	UFL1	UFM1 specific ligase 1	0.967	5.125
8095736	AREG	amphiregulin	0.966	2.288
8056060	BAZ2B	bromodomain adjacent to zinc finger domain 2B	0.966	5.113
8112081	DHX29	DEAH-box helicase 29	0.966	4.728
8113914	FNIP1	folliculin interacting protein 1	0.965	5.862
7962441	TWF1	twinfilin actin binding protein 1	0.965	6.948
8112772	AP3B1	adaptor related protein complex 3 beta 1 subunit	0.964	6.241
7976307	GOLGA5	golgin A5	0.964	5.519
8091737	IFT80	intraflagellar transport 80	0.964	5.199
7909898	MIA3	MIA family member 3, ER export factor	0.964	4.919
7916592	MYSM1	Myb like, SWIRM and MPN domains 1	0.964	5.08
8089234	ZBTB11	zinc finger and BTB domain containing 11	0.964	5.007
7965873	IGF1	insulin like growth factor 1	0.963	2.6
7933139	ZNF33B	zinc finger protein 33B	0.963	4.117
7929609	C10orf12	chromosome 10 open reading frame 12	0.962	6.024
8063437	TSHZ2	teashirt zinc finger homeobox 2	0.962	3.018
8038919	ZNF350	zinc finger protein 350	0.962	7.13
7924773	CDC42BPA	CDC42 binding protein kinase alpha	0.961	5.706
8043324	RGPD2///RGPD6///RGPD8///RGPD3///RGPD1///RGPD4///RGPD5///RANBP2	RANBP2-like and GRIP domain containing 2///RANBP2-like and GRIP domain containing 6///RANBP2-like and GRIP domain containing 8///RANBP2-like and GRIP domain containing 3///RANBP2-like and GRIP domain containing 1///RANBP2-like and GRIP domain containing 4///RANBP2-like and GRIP domain containing 5///RAN binding protein 2	0.961	4.182
8083876	SKIL	SKI-like proto-oncogene	0.961	4.919
8038933	ZNF614	zinc finger protein 614	0.961	4.94
7916747	JAK1	Janus kinase 1	0.96	3.916
8011832	NUP88	nucleoporin 88	0.96	4.693
8133770	CCDC146	coiled-coil domain containing 146	0.959	4.76
8046861	ITGAV	integrin subunit alpha V	0.959	4.859
7976598	PAPOLA	poly(A) polymerase alpha	0.959	6.599
8106122	TNPO1	transportin 1	0.959	4.939
7989146	MNS1	meiosis specific nuclear structural 1	0.958	3.545
8054872	TFCP2L1	transcription factor CP2-like 1	0.958	3.193
8121489	AMD1	adenosylmethionine decarboxylase 1	0.957	3.94
8017212	USP32	ubiquitin specific peptidase 32	0.957	5.211
8083090	ZBTB38	zinc finger and BTB domain containing 38	0.957	3.183
8035838	ZNF724	zinc finger protein 724	0.957	3.474
8104449	CCT5	chaperonin containing TCP1 subunit 5	0.956	4.038
8138670	HNRNPA2B1	heterogeneous nuclear ribonucleoprotein A2/B1	0.956	5.021
7929078	KIF20B	kinesin family member 20B	0.956	6.911
7939158	QSER1	glutamine and serine rich 1	0.956	4.613
7938370	SWAP70	SWAP switching B-cell complex 70kDa subunit	0.956	5.18
8021984	YES1	YES proto-oncogene 1, Src family tyrosine kinase	0.956	5.74
8106516	JMY	junction mediating and regulatory protein, p53 cofactor	0.955	5.566
8135392	HBP1	HMG-box transcription factor 1	0.954	4.561
8045619	EPC2	enhancer of polycomb homolog 2	0.953	5.678
8129953	HIVEP2	human immunodeficiency virus type I enhancer binding protein 2	0.953	2.518
7938702	NCR3LG1	natural killer cell cytotoxicity receptor 3 ligand 1	0.953	2.869
8167763	TSPYL2	TSPY like 2	0.953	4.778
8042737	ALMS1	ALMS1, centrosome and basal body associated protein	0.952	4.737
7961654	RECQL	RecQ like helicase	0.952	4.985
8083605	RSRC1	arginine and serine rich coiled-coil 1	0.952	5.502
8108134	DDX46	DEAD-box helicase 46	0.951	6.7
8127698	PHIP	pleckstrin homology domain interacting protein	0.951	3.989
8174985	SMARCA1	SWI/SNF related, matrix associated, actin dependent regulator of chromatin, subfamily a, member 1	0.951	4.544
8085360	TIMP4	TIMP metallopeptidase inhibitor 4	0.951	4.216
7990092	MYO9A	myosin IXA	0.95	4.206
8079079	NKTR	natural killer cell triggering receptor	0.95	3.712
7968746	WBP4	WW domain binding protein 4	0.949	6.066
8113130	MCTP1	multiple C2 and transmembrane domain containing 1	0.948	3.539
8080685	SLMAP	sarcolemma associated protein	0.948	6.904
8127977	SYNCRIP	synaptotagmin binding cytoplasmic RNA interacting protein	0.948	6.671
8161701	TMEM2	transmembrane protein 2	0.948	3.793
7968333	USPL1	ubiquitin specific peptidase like 1	0.948	5.654
8083183	U2SURP	U2 snRNP associated SURP domain containing	0.947	5.019
7938422	CTR9	CTR9 homolog, Paf1/RNA polymerase II complex component	0.946	4.645
8164165	HSPA5	heat shock protein family A (Hsp70) member 5	0.946	4.212
8107532	HSD17B4	hydroxysteroid 17-beta dehydrogenase 4	0.945	4.305
8121861	NCOA7	nuclear receptor coactivator 7	0.945	4.656
7917148	AIDA	axin interactor, dorsalization associated	0.944	5.394
8041592	EML4///ALK	echinoderm microtubule associated protein like 4///anaplastic lymphoma receptor tyrosine kinase	0.944	3.977
8174717	UPF3B	UPF3 regulator of nonsense transcripts homolog B (yeast)	0.944	5.607
8094638	WDR19	WD repeat domain 19	0.944	4.756
7933772	ANK3	ankyrin 3, node of Ranvier (ankyrin G)	0.943	3.449
8147724	ATP6V1C1	ATPase H+ transporting V1 subunit C1	0.943	5.992
7956989	MDM2	MDM2 proto-oncogene	0.943	5.721
8090277	OSBPL11	oxysterol binding protein like 11	0.943	4.703
8147580	VPS13B	vacuolar protein sorting 13 homolog B	0.943	4.066
8069711	LTN1	listerin E3 ubiquitin protein ligase 1	0.942	4.994
8166826	USP9X	ubiquitin specific peptidase 9, X-linked	0.942	5.578
7947694	CKAP5	cytoskeleton associated protein 5	0.941	4.346
7965723	UHRF1BP1L	UHRF1 binding protein 1 like	0.939	7.315
8083941	ECT2	epithelial cell transforming 2	0.938	4.73
8058627	ERBB4	erb-b2 receptor tyrosine kinase 4	0.938	3.52
8157524	TLR4	toll like receptor 4	0.938	3.692
8105681	ERBIN	erbb2 interacting protein	0.937	6.869
8042588	MPHOSPH10	M-phase phosphoprotein 10	0.937	6.107
7917182	ADGRL4	adhesion G protein-coupled receptor L4	0.936	5.967
7946048	HBG2///HBG1	hemoglobin subunit gamma 2///hemoglobin subunit gamma 1	0.935	2.331
8120783	MYO6	myosin VI	0.935	5.109
7924526	TP53BP2	tumor protein p53 binding protein 2	0.934	3.992
8145365	DOCK5	dedicator of cytokinesis 5	0.933	2.941
8020149	NAPG	NSF attachment protein gamma	0.933	3.511
8099760	ARAP2	ArfGAP with RhoGAP domain, ankyrin repeat and PH domain 2	0.932	3.887
8112337	SREK1IP1	SREK1 interacting protein 1	0.932	6.566
8005689	USP32P2///USP32P1	ubiquitin specific peptidase 32 pseudogene 2///ubiquitin specific peptidase 32 pseudogene 1	0.932	2.755
7965359	ATP2B1	ATPase plasma membrane Ca2+ transporting 1	0.931	4.095
8056611	LRP2	LDL receptor related protein 2	0.931	1.745
8155602	LOC102725104///ANKRD20A21P///LOC101059935///ANKRD20A12P///ANKRD20A8P///ANKRD20A4///ANKRD20A2///ANKRD20A3///ANKRD20A5P///ANKRD20A1	putative ankyrin repeat domain-containing protein 20A12 pseudogene///ankyrin repeat domain 20 family member A21, pseudogene///ankyrin repeat domain-containing protein 18A-like///ankyrin repeat domain 20 family member A12, pseudogene///ankyrin repeat domain 20 family member A8, pseudogene///ankyrin repeat domain 20 family member A4///ankyrin repeat domain 20 family member A2///ankyrin repeat domai…	0.93	3.398
8138504	RAPGEF5	Rap guanine nucleotide exchange factor 5	0.93	3.218
7981192	ATG2B	autophagy related 2B	0.929	3.867
7951140	LOC100131541	uncharacterized LOC100131541	0.929	3.425
7969390	PIBF1	progesterone immunomodulatory binding factor 1	0.929	5.969
8065032	ESF1	ESF1 nucleolar pre-rRNA processing protein homolog	0.928	5.617
7935058	MYOF	myoferlin	0.928	3.677
7935707	CHUK	conserved helix-loop-helix ubiquitous kinase	0.927	5.2
8057441	CWC22	CWC22 homolog, spliceosome-associated protein	0.927	5.136
8047865	PIKFYVE	phosphoinositide kinase, FYVE-type zinc finger containing	0.927	5.106
8021470	PMAIP1	phorbol-12-myristate-13-acetate-induced protein 1	0.927	1.799
8046169	PPIG	peptidylprolyl isomerase G	0.926	5.47
8101099	SDAD1	SDA1 domain containing 1	0.926	5.523
7983910	AQP9	aquaporin 9	0.925	1.852
8134351	PPP1R9A	protein phosphatase 1 regulatory subunit 9A	0.925	4.564
8100615	UBA6	ubiquitin like modifier activating enzyme 6	0.925	5.978
8090237	ZNF148	zinc finger protein 148	0.925	5.224
8014487	ACACA	acetyl-CoA carboxylase alpha	0.924	3.848
7903565	GPSM2	G-protein signaling modulator 2	0.924	4.458
8008493	LUC7L3	LUC7 like 3 pre-mRNA splicing factor	0.923	4.62
7996954	NFAT5	nuclear factor of activated T-cells 5	0.923	5.604
7926916	ZEB1	zinc finger E-box binding homeobox 1	0.923	4.673
7938762	GTF2H1	general transcription factor IIH subunit 1	0.921	5.684
8065730	EIF2S2	eukaryotic translation initiation factor 2 subunit beta	0.92	6.497
7931914	IL2RA	interleukin 2 receptor subunit alpha	0.92	2.688
8004111	RABEP1	rabaptin, RAB GTPase binding effector protein 1	0.92	5.655
7947248	KIF18A	kinesin family member 18A	0.919	5.558
8147079	LRRCC1	leucine rich repeat and coiled-coil centrosomal protein 1	0.919	5.662
8106602	ZFYVE16	zinc finger FYVE-type containing 16	0.919	6.323
7917779	GCLM	glutamate-cysteine ligase modifier subunit	0.918	2.153
7917996	LRRC39	leucine rich repeat containing 39	0.918	5.476
8042086	VRK2	vaccinia related kinase 2	0.918	5.8
7987892	ZNF106	zinc finger protein 106	0.917	3.323
8078110	CAPN7	calpain 7	0.916	5.395
8180326	BAGE4	B melanoma antigen family member 4	0.915	6.453
7995552	CYLD	CYLD lysine 63 deubiquitinase	0.915	3.495
8160581	TOPORS	TOP1 binding arginine/serine rich protein	0.915	4.735
8111584	C5orf42	chromosome 5 open reading frame 42	0.914	5.947
7950990	SLC36A4	solute carrier family 36 member 4	0.914	6.11
8081431	ALCAM	activated leukocyte cell adhesion molecule	0.913	4.201
7951447	CWF19L2	CWF19-like 2, cell cycle control (S. pombe)	0.913	5.124
8136259	MKLN1	muskelin 1	0.913	4.249
8009417	KPNA2	karyopherin subunit alpha 2	0.912	4.368
7990636	LINC00597	long intergenic non-protein coding RNA 597	0.912	4.281
7924405	RAB3GAP2	RAB3 GTPase activating non-catalytic protein subunit 2	0.912	4.17
8122265	TNFAIP3	TNF alpha induced protein 3	0.912	3.42
8088958	GBE1	glucan (1,4-alpha-), branching enzyme 1	0.911	5.57
8116664	PRPF4B	pre-mRNA processing factor 4B	0.911	4.351
7982358	ARHGAP11A	Rho GTPase activating protein 11A	0.91	3.661
8093053	TFRC	transferrin receptor	0.91	3.282
8134180	ANKIB1	ankyrin repeat and IBR domain containing 1	0.909	4.764
8096682	ARHGEF38	Rho guanine nucleotide exchange factor 38	0.909	2.689
7931216	FAM175B	family with sequence similarity 175 member B	0.909	4.679
7958846	PTPN11	protein tyrosine phosphatase, non-receptor type 11	0.909	4.928
7951008	TAF1D	TATA-box binding protein associated factor, RNA polymerase I subunit D	0.909	5.029
7908614	CAMSAP2	calmodulin regulated spectrin associated protein family member 2	0.908	5.372
8174253	MORF4L2	mortality factor 4 like 2	0.908	4.588
8042270	UGP2	UDP-glucose pyrophosphorylase 2	0.908	4.697
7903239	AGL	amylo-alpha-1, 6-glucosidase, 4-alpha-glucanotransferase	0.907	4.796
8091354	HLTF	helicase like transcription factor	0.907	4.09
8166278	SCML1	sex comb on midleg-like 1 (Drosophila)	0.907	3.922
8134051	CFAP69	cilia and flagella associated protein 69	0.906	3.375
7982597	THBS1	thrombospondin 1	0.906	2.192
8038998	ZNF468	zinc finger protein 468	0.906	6.165
8035847	ZNF675	zinc finger protein 675	0.906	7.007
8104079	FAT1	FAT atypical cadherin 1	0.905	4.461
7987869	TMEM87A	transmembrane protein 87A	0.905	4.519
7927732	ARID5B	AT-rich interaction domain 5B	0.904	3.547
8056257	FAP	fibroblast activation protein alpha	0.904	2.799
7950606	RSF1	remodeling and spacing factor 1	0.904	5.713
8013305	ZNF286B///ZNF286A	zinc finger protein 286B///zinc finger protein 286A	0.904	5.713
8176234	CLIC2	chloride intracellular channel 2	0.903	4.978
7954090	EMP1	epithelial membrane protein 1	0.903	2.181
8089112	FILIP1L	filamin A interacting protein 1 like	0.903	4.174
8168622	KLHL4	kelch like family member 4	0.903	4.189
8027312	ZNF429	zinc finger protein 429	0.903	4.058
8042601	ZNF638	zinc finger protein 638	0.903	5.052
8041283	BIRC6	baculoviral IAP repeat containing 6	0.902	4.707
8149116	DEFA1B///DEFA3///DEFA1	defensin alpha 1B///defensin alpha 3///defensin alpha 1	0.902	1.83
8092905	LSG1	large 60S subunit nuclear export GTPase 1	0.902	4.531
7909931	BROX	BRO1 domain and CAAX motif containing	0.901	7.237
7912852	EIF1AX	eukaryotic translation initiation factor 1A, X-linked	0.901	6.62
8096669	TET2	tet methylcytosine dioxygenase 2	0.901	3.943
8105040	OSMR	oncostatin M receptor	0.9	2.911
7906819	ATF6	activating transcription factor 6	0.899	4.562
8017421	CCDC47	coiled-coil domain containing 47	0.899	5.614
8067839	FGF7P3///FGF7P6///FGF7	fibroblast growth factor 7 pseudogene 3///fibroblast growth factor 7 pseudogene 6///fibroblast growth factor 7	0.899	3.306
8105778	PIK3R1	phosphoinositide-3-kinase regulatory subunit 1	0.899	3.534
8081465	BBX	BBX, HMG-box containing	0.898	3.832
8102076	CENPE	centromere protein E	0.896	6.09
8099897	UGDH	UDP-glucose 6-dehydrogenase	0.896	3.104
8139165	VPS41	VPS41, HOPS complex subunit	0.896	4.117
8035813	ZNF43	zinc finger protein 43	0.896	5.969
7983630	FGF7	fibroblast growth factor 7	0.895	2.028
8128394	PNISR	PNN interacting serine and arginine rich protein	0.895	3.567
7939424	API5	apoptosis inhibitor 5	0.894	4.504
7979044	NIN	ninein	0.894	5.355
7978449	HECTD1	HECT domain E3 ubiquitin protein ligase 1	0.892	4.189
7916077	NRDC	nardilysin convertase	0.892	4.34
8000003	THUMPD1	THUMP domain containing 1	0.892	5.279
7985829	FANCI	Fanconi anemia complementation group I	0.891	5.141
8138834	FKBP14	FK506 binding protein 14	0.891	4.199
8090577	MBD4	methyl-CpG binding domain 4, DNA glycosylase	0.891	5.682
7951497	NPAT	nuclear protein, coactivator of histone transcription	0.891	5
7984112	RAB8B	RAB8B, member RAS oncogene family	0.891	5.412
7965979	ALDH1L2	aldehyde dehydrogenase 1 family member L2	0.89	4.143
8091190	ATR	ATR serine/threonine kinase	0.89	4.775
8156581	ERCC6L2	ERCC excision repair 6 like 2	0.89	4.886
7911178	NLRP3	NLR family pyrin domain containing 3	0.89	3.371
8045946	PSMD14	proteasome 26S subunit, non-ATPase 14	0.89	5.239
8036324	ZNF260	zinc finger protein 260	0.89	3.848
7943349	ARHGAP42	Rho GTPase activating protein 42	0.889	5.043
8112139	IL6ST	interleukin 6 signal transducer	0.889	4.218
7988713	TRPM7	transient receptor potential cation channel subfamily M member 7	0.889	6.562
8113616	FEM1C	fem-1 homolog C	0.888	4.584
7988921	MYO5A	myosin VA	0.888	3.701
8152553	TAF2	TATA-box binding protein associated factor 2	0.888	5.464
8143663	EZH2	enhancer of zeste 2 polycomb repressive complex 2 subunit	0.887	3.953
8080973	PPP4R2	protein phosphatase 4 regulatory subunit 2	0.887	6.708
7980547	SEL1L	SEL1L ERAD E3 ligase adaptor subunit	0.887	3.985
7957890	UTP20	UTP20, small subunit processome component	0.887	3.519
8085660	DPH3	diphthamide biosynthesis 3	0.886	5.616
8046099	NOSTRIN	nitric oxide synthase trafficking	0.886	2.679
7946107	OR52N1	olfactory receptor family 52 subfamily N member 1	0.886	2.321
8082100	PARP14	poly(ADP-ribose) polymerase family member 14	0.886	2.744
8117630	ZNF165	zinc finger protein 165	0.886	3.627
8107330	APC	APC, WNT signaling pathway regulator	0.885	4.339
8007885	NSF	N-ethylmaleimide sensitive factor, vesicle fusing ATPase	0.885	3.478
7943715	ZC3H12C	zinc finger CCCH-type containing 12C	0.885	4.848
7929562	ZNF518A	zinc finger protein 518A	0.885	3.447
7929168	TNKS2	tankyrase 2	0.884	4.418
8097335	HSPA4L	heat shock protein family A (Hsp70) member 4 like	0.883	2.392
8103979	CFAP97	cilia and flagella associated protein 97	0.882	5.618
8129706	HBS1L	HBS1 like translational GTPase	0.882	5.102
7932765	MPP7	membrane palmitoylated protein 7	0.882	4.593
7975521	RBM25	RNA binding motif protein 25	0.882	5.959
7970569	SACS	sacsin molecular chaperone	0.882	4.331
8027439	ZNF507	zinc finger protein 507	0.882	3.803
8070046	PAXBP1	PAX3 and PAX7 binding protein 1	0.881	5.236
8001423	RPGRIP1L	RPGRIP1 like	0.881	5.613
8099649	DHX15	DEAH-box helicase 15	0.88	4.406
7960411	C12orf4	chromosome 12 open reading frame 4	0.879	5.169
7925364	HEATR1	HEAT repeat containing 1	0.879	2.768
8060813	MCM8	minichromosome maintenance 8 homologous recombination repair factor	0.879	6.835
8047606	NBEAL1	neurobeachin like 1	0.879	5.156
8166408	PHEX	phosphate regulating endopeptidase homolog, X-linked	0.878	2.929
7918955	GDAP2	ganglioside induced differentiation associated protein 2	0.877	3.977
7988876	MYO5C	myosin VC	0.877	4.058
7976810	SNORD113-3	small nucleolar RNA, C/D box 113-3	0.877	2.97
7904364	WDR3	WD repeat domain 3	0.876	4.057
7951545	EXPH5	exophilin 5	0.875	3.438
7917532	GBP2	guanylate binding protein 2	0.875	2.911
7923119	ZBTB41	zinc finger and BTB domain containing 41	0.875	4.287
8115524	CLINT1	clathrin interactor 1	0.873	5.077
8138922	KBTBD2	kelch repeat and BTB domain containing 2	0.873	4.5
7987981	UBR1	ubiquitin protein ligase E3 component n-recognin 1	0.873	4.195
7954245	PLEKHA5	pleckstrin homology domain containing A5	0.872	5.511
8100902	ANKRD17	ankyrin repeat domain 17	0.871	4.402
8017736	CEP112	centrosomal protein 112	0.871	5.001
8109062	FBXO38	F-box protein 38	0.87	3.925
7921909	CCDC190	coiled-coil domain containing 190	0.869	2.07
7988789	DMXL2	Dmx like 2	0.869	3.773
8160011	KIAA2026	KIAA2026	0.869	4.381
7967304	RSRC2	arginine and serine rich coiled-coil 2	0.869	5.847
7923967	YOD1	YOD1 deubiquitinase	0.869	4.471
7983350	EIF3J	eukaryotic translation initiation factor 3 subunit J	0.868	5.099
8099364	ZNF518B	zinc finger protein 518B	0.868	4.735
8043697	ANKRD36BP2///ANKRD36C///ANKRD36///ANKRD36B	ankyrin repeat domain 36B pseudogene 2///ankyrin repeat domain 36C///ankyrin repeat domain 36///ankyrin repeat domain 36B	0.867	5.223
8154670	IFT74	intraflagellar transport 74	0.867	7.317
7951554	RDX	radixin	0.867	4.761
8172876	SMC1A	structural maintenance of chromosomes 1A	0.867	5.249
8047127	MYO1B	myosin IB	0.866	4.098
8023561	LMAN1	lectin, mannose binding 1	0.865	5.104
7951422	MSANTD4	Myb/SANT DNA binding domain containing 4 with coiled-coils	0.865	4.711
8035765	ZNF14	zinc finger protein 14	0.865	5.238
7925672	ZNF670	zinc finger protein 670	0.865	3.733
7954527	ARNTL2	aryl hydrocarbon receptor nuclear translocator like 2	0.864	4.378
7985555	EFTUD1P1///EFL1	elongation factor Tu GTP binding domain containing 1 pseudogene 1///elongation factor like GTPase 1	0.864	4.007
7958216	KIAA1033	KIAA1033	0.864	4.39
7989365	RORA	RAR related orphan receptor A	0.864	4.239
7989849	DENND4A	DENN domain containing 4A	0.862	4.337
8084971	SENP5	SUMO1/sentrin specific peptidase 5	0.862	4.105
8061579	TPX2	TPX2, microtubule nucleation factor	0.862	5.618
7903519	PRPF38B	pre-mRNA processing factor 38B	0.861	7.406
8094460	RBPJ	recombination signal binding protein for immunoglobulin kappa J region	0.861	5.836
8116247	ZNF354A	zinc finger protein 354A	0.861	5.229
7994161	RBBP6	RB binding protein 6, ubiquitin ligase	0.86	5.454
8081645	C3orf52	chromosome 3 open reading frame 52	0.859	3.29
8145782	MAK16	MAK16 homolog	0.859	4.551
7930454	PDCD4	programmed cell death 4 (neoplastic transformation inhibitor)	0.859	6.077
8038942	ZNF432	zinc finger protein 432	0.859	4.835
7975676	BBOF1	basal body orientation factor 1	0.858	3.1
8107474	DMXL1	Dmx like 1	0.858	4.934
8057933	GTF3C3	general transcription factor IIIC subunit 3	0.858	4.494
8093258	IQCG	IQ motif containing G	0.858	3.594
8128894	REV3L	REV3 like, DNA directed polymerase zeta catalytic subunit	0.857	5.897
8146482	TGS1	trimethylguanosine synthase 1	0.857	6.239
8130556	SOD2	superoxide dismutase 2, mitochondrial	0.856	2.712
7908978	ZC3H11A	zinc finger CCCH-type containing 11A	0.856	3.769
7979367	EXOC5	exocyst complex component 5	0.855	4.991
7937915	RRM1	ribonucleotide reductase catalytic subunit M1	0.855	3.712
8051963	SRBD1	S1 RNA binding domain 1	0.855	5.281
8030908	ZNF480	zinc finger protein 480	0.855	6.956
7908330	C1orf27	chromosome 1 open reading frame 27	0.854	6.001
8027368	ZNF254	zinc finger protein 254	0.854	5.672
8025984	ZNF844	zinc finger protein 844	0.854	3.488
8175492	ATP11C	ATPase phospholipid transporting 11C	0.853	5.374
8023481	NARS	asparaginyl-tRNA synthetase	0.853	4.515
8057517	NCKAP1	NCK associated protein 1	0.853	5.53
8130567	TCP1	t-complex 1	0.853	4.665
8094240	CD38	CD38 molecule	0.852	2.221
8098177	KLHL2	kelch like family member 2	0.852	5.123
8096098	COPS4	COP9 signalosome subunit 4	0.851	7.118
7978866	NEMF	nuclear export mediator factor	0.851	7.61
7971541	SUCLA2	succinate-CoA ligase ADP-forming beta subunit	0.851	5.029
7955019	ARID2	AT-rich interaction domain 2	0.85	5.633
7898910	PNRC2	proline rich nuclear receptor coactivator 2	0.85	5.015
8008547	TOM1L1	target of myb1 like 1 membrane trafficking protein	0.85	4.551
8047784	ZDBF2	zinc finger DBF-type containing 2	0.85	5.475
8147262	OTUD6B	OTU domain containing 6B	0.849	6.51
7955646	EIF4B	eukaryotic translation initiation factor 4B	0.848	4.399
7901385	OSBPL9	oxysterol binding protein like 9	0.848	4.682
8052680	RAB1A	RAB1A, member RAS oncogene family	0.848	7.586
8098581	SNX25	sorting nexin 25	0.848	2.595
7911138	CNST	consortin, connexin sorting protein	0.847	4.701
8162850	TEX10	testis expressed 10	0.847	5.154
7932678	YME1L1	YME1 like 1 ATPase	0.847	5.663
8027304	ZNF493	zinc finger protein 493	0.847	5.104
7954631	FAR2	fatty acyl-CoA reductase 2	0.846	2.606
7990582	SCAPER	S-phase cyclin A associated protein in the ER	0.846	3.872
7911017	SDCCAG8	serologically defined colon cancer antigen 8	0.846	4.096
8146637	YTHDF3	YTH N6-methyladenosine RNA binding protein 3	0.846	6.554
8011823	ZNF594	zinc finger protein 594	0.845	4.022
8017964	ABCA6	ATP binding cassette subfamily A member 6	0.844	3.196
8089954	IQCB1	IQ motif containing B1	0.844	4.447
7949931	KMT5B	lysine methyltransferase 5B	0.844	4.322
8091283	PLOD2	procollagen-lysine,2-oxoglutarate 5-dioxygenase 2	0.844	4.656
8148280	SQLE	squalene epoxidase	0.844	3.7
8025998	ZNF136	zinc finger protein 136	0.844	5.01
8122756	PLEKHG1///PLEKHG1	pleckstrin homology and RhoGEF domain containing G1///pleckstrin homology and RhoGEF domain containing G1	0.843	3.03
8114083	AFF4	AF4/FMR2 family member 4	0.842	4.37
7986520	DNM1P46///DNM1P46	dynamin 1 pseudogene 46///dynamin 1 pseudogene 46	0.842	3.489
8056408	GALNT3	polypeptide N-acetylgalactosaminyltransferase 3	0.841	4.208
7984263	HACD3	3-hydroxyacyl-CoA dehydratase 3	0.84	4.201
7931754	IDI1	isopentenyl-diphosphate delta isomerase 1	0.84	4.704
8150491	KAT6A	lysine acetyltransferase 6A	0.84	3.088
8152782	KIAA0196	KIAA0196	0.84	3.721
8092328	MCCC1	methylcrotonoyl-CoA carboxylase 1	0.84	3.287
8021685	CCDC102B	coiled-coil domain containing 102B	0.839	3.594
8162313	IARS	isoleucyl-tRNA synthetase	0.839	3.203
7951112	MTMR2	myotubularin related protein 2	0.839	4.339
8164013	STRBP	spermatid perinuclear RNA binding protein	0.839	5.779
8027241	ZNF253	zinc finger protein 253	0.839	4.921
7971197	ELF1	E74 like ETS transcription factor 1	0.838	5.056
7952451	LOC100130428	IGYY565	0.838	3.794
7989023	RAB27A	RAB27A, member RAS oncogene family	0.838	4.904
8081256	TBC1D23	TBC1 domain family member 23	0.838	7.118
8173059	WNK3	WNK lysine deficient protein kinase 3	0.838	6.227
8113369	SLCO4C1	solute carrier organic anion transporter family member 4C1	0.837	2.565
8100870	ADAMTS3	ADAM metallopeptidase with thrombospondin type 1 motif 3	0.836	6.269
8081362	CEP97	centrosomal protein 97	0.836	5.182
7955361	LARP4	La ribonucleoprotein domain family member 4	0.836	4.658
8021653	SERPINB8	serpin family B member 8	0.836	2.37
8050190	ADAM17	ADAM metallopeptidase domain 17	0.835	3.519
7943424	BIRC2	baculoviral IAP repeat containing 2	0.834	5.304
8082607	ATP2C1	ATPase secretory pathway Ca2+ transporting 1	0.833	5.504
7943297	CEP57	centrosomal protein 57	0.833	4.874
7915130	SF3A3	splicing factor 3a subunit 3	0.833	4.864
8093336	ABCA11P///ZNF141	ATP binding cassette subfamily A member 11, pseudogene///zinc finger protein 141	0.832	5.185
8065089	KIF16B	kinesin family member 16B	0.832	4.576
7970624	CENPJ	centromere protein J	0.831	4.685
8017634	DDX5	DEAD-box helicase 5	0.831	3.988
7917912	DPYD	dihydropyrimidine dehydrogenase	0.831	4.025
8121916	RSPO3	R-spondin 3	0.831	5.47
7903803	AHCYL1	adenosylhomocysteinase like 1	0.83	3.26
8089835	FSTL1	follistatin like 1	0.83	3.163
8114861	LARS	leucyl-tRNA synthetase	0.83	3.801
8096538	RAP1GDS1	Rap1 GTPase-GDP dissociation stimulator 1	0.83	5.599
8079346	SACM1L	SAC1 suppressor of actin mutations 1-like (yeast)	0.83	3.533
8180325	BAGE5	B melanoma antigen family member 5	0.829	5.741
7954711	KIAA1551	KIAA1551	0.829	4.304
8092295	CCDC39	coiled-coil domain containing 39	0.828	2.385
8096959	ANK2	ankyrin 2, neuronal	0.827	2.989
8128429	CCNC	cyclin C	0.827	7.233
8105463	GPBP1	GC-rich promoter binding protein 1	0.827	5.291
7904486	NBPF25P///NBPF19///NBPF20///NBPF10///NBPF8///NBPF9///NBPF15///NBPF11///NBPF12///NBPF3///NBPF1///NBPF14	neuroblastoma breakpoint family member 25, pseudogene///neuroblastoma breakpoint family member 19///neuroblastoma breakpoint family member 20///neuroblastoma breakpoint family member 10///neuroblastoma breakpoint family member 8///neuroblastoma breakpoint family member 9///neuroblastoma breakpoint family member 15///neuroblastoma breakpoint family member 11///neuroblastoma breakpoint family membe…	0.827	5.126
7963157	RACGAP1	Rac GTPase activating protein 1	0.827	6.113
7918825	CSDE1	cold shock domain containing E1	0.826	3.899
7982757	KNL1	kinetochore scaffold 1	0.826	6.324
7918622	SLC16A1	solute carrier family 16 member 1	0.826	3.523
8116780	DSP	desmoplakin	0.825	2.467
7952988	ERC1	ELKS/RAB6-interacting/CAST family member 1	0.825	5.56
8021015	PIK3C3	phosphatidylinositol 3-kinase catalytic subunit type 3	0.825	5.103
8052418	PUS10	pseudouridylate synthase 10	0.825	5.08
8121181	FHL5	four and a half LIM domains 5	0.824	2.855
8100179	NFXL1	nuclear transcription factor, X-box binding like 1	0.824	6.53
8007071	CDC6	cell division cycle 6	0.823	3.358
8098121	RAPGEF2	Rap guanine nucleotide exchange factor 2	0.823	4.164
8008566	STXBP4	syntaxin binding protein 4	0.823	4.317
8001693	CNOT1	CCR4-NOT transcription complex subunit 1	0.822	3.604
8166925	MAOA	monoamine oxidase A	0.822	3.169
8061324	XRN2	5'-3' exoribonuclease 2	0.822	4.1
8135277	KMT2E	lysine methyltransferase 2E	0.821	5.388
8022283	PIEZO2	piezo type mechanosensitive ion channel component 2	0.821	4.424
8077353	TRNT1	tRNA nucleotidyl transferase 1	0.821	3.905
8162631	ZNF510	zinc finger protein 510	0.821	4.507
8126798	ADGRF5	adhesion G protein-coupled receptor F5	0.82	3.18
8056829	CIR1	corepressor interacting with RBPJ, 1	0.82	5.792
7982889	NUSAP1	nucleolar and spindle associated protein 1	0.82	4.991
8103079	PRMT9	protein arginine methyltransferase 9	0.82	5.225
8171762	RPS6KA3	ribosomal protein S6 kinase A3	0.82	4.296
8022882	ZNF24	zinc finger protein 24	0.82	3.31
7933047	CUL2	cullin 2	0.819	5.821
8043283	KDM3A	lysine demethylase 3A	0.819	3.216
7923453	KDM5B	lysine demethylase 5B	0.819	4.068
8049512	LRRFIP1	LRR binding FLII interacting protein 1	0.819	4.323
8075130	PITPNB	phosphatidylinositol transfer protein beta	0.819	5.072
8120382	ZNF451	zinc finger protein 451	0.819	4.649
8090133	CCDC14	coiled-coil domain containing 14	0.818	3.1
8105523	KIF2A	kinesin family member 2A	0.818	5.965
7907404	SUCO	SUN domain containing ossification factor	0.818	6.259
7938331	ZNF143	zinc finger protein 143	0.818	4.787
7925500	CHML	CHM like, Rab escort protein 2	0.817	3.706
8051501	EIF2AK2	eukaryotic translation initiation factor 2 alpha kinase 2	0.817	2.883
7922637	TOR1AIP2	torsin 1A interacting protein 2	0.817	3.728
8067903	USP25	ubiquitin specific peptidase 25	0.817	5.362
8085774	ZNF385D	zinc finger protein 385D	0.817	2.926
8017312	MED13	mediator complex subunit 13	0.816	5.326
7975203	MPP5	membrane palmitoylated protein 5	0.816	4.517
8091009	PIK3CB	phosphatidylinositol-4,5-bisphosphate 3-kinase catalytic subunit beta	0.816	5.277
8035782	ZNF682	zinc finger protein 682	0.816	3.476
8052024	FBXO11	F-box protein 11	0.815	5.038
7917103	ZZZ3	zinc finger ZZ-type containing 3	0.815	4.698
7957633	METAP2	methionyl aminopeptidase 2	0.814	5.132
8096463	SMARCAD1	SWI/SNF-related, matrix-associated actin-dependent regulator of chromatin, subfamily a, containing DEAD/H box 1	0.814	4.116
7990879	EFL1	elongation factor like GTPase 1	0.813	4.922
8114326	FAM13B	family with sequence similarity 13 member B	0.813	6.392
8045697	RIF1	replication timing regulatory factor 1	0.813	4.836
8006030	TAOK1	TAO kinase 1	0.813	4.937
7921434	AIM2	absent in melanoma 2	0.812	2.436
7922823	EDEM3	ER degradation enhancing alpha-mannosidase like protein 3	0.812	4.563
7930008	NOLC1	nucleolar and coiled-body phosphoprotein 1	0.812	3.006
8174340	RBM41	RNA binding motif protein 41	0.812	4.602
8020323	RNMT	RNA guanine-7 methyltransferase	0.812	5.889
8004144	MIS12	MIS12, kinetochore complex component	0.811	3.178
7970602	PARP4	poly(ADP-ribose) polymerase family member 4	0.811	3.359
8020702	TAF4B	TATA-box binding protein associated factor 4b	0.811	3.224
8160213	TTC39B	tetratricopeptide repeat domain 39B	0.81	3.833
8054997	MAP3K2	mitogen-activated protein kinase kinase kinase 2	0.809	4.733
7924701	ACBD3	acyl-CoA binding domain containing 3	0.808	5.429
8180328	BAGE2	B melanoma antigen family member 2	0.808	6.335
8079021	CTNNB1	catenin beta 1	0.808	3.731
7940147	FAM111B	family with sequence similarity 111 member B	0.808	5.676
7942527	POLD3	DNA polymerase delta 3, accessory subunit	0.808	4.882
8097841	TRIM2	tripartite motif containing 2	0.808	4.124
8063283	CSE1L	chromosome segregation 1 like	0.807	5.276
7991406	PRC1	protein regulator of cytokinesis 1	0.807	5.944
8081115	ARL13B	ADP ribosylation factor like GTPase 13B	0.806	4.793
8173848	HDX	highly divergent homeobox	0.806	5.476
7923131	DENND1B	DENN domain containing 1B	0.805	5.101
8127158	GCLC	glutamate-cysteine ligase catalytic subunit	0.805	4.673
8065071	FLRT3	fibronectin leucine rich transmembrane protein 3	0.804	3.724
7908041	LAMC1	laminin subunit gamma 1	0.804	3.799
7934278	P4HA1///P4HA1	prolyl 4-hydroxylase subunit alpha 1///prolyl 4-hydroxylase subunit alpha 1	0.804	3.014
7999326	USP7	ubiquitin specific peptidase 7	0.804	4.251
8036813	ZNF780B	zinc finger protein 780B	0.804	3.804
7985695	AKAP13	A-kinase anchoring protein 13	0.803	3.615
7925201	ARID4B	AT-rich interaction domain 4B	0.803	4.923
7945014	CHEK1	checkpoint kinase 1	0.803	3.579
7968516	PDS5B	PDS5 cohesin associated factor B	0.803	4.445
8076515	ARFGAP3	ADP ribosylation factor GTPase activating protein 3	0.802	3.48
8097600	SMARCA5	SWI/SNF related, matrix associated, actin dependent regulator of chromatin, subfamily a, member 5	0.802	4.705
7942032	PPP6R3	protein phosphatase 6 regulatory subunit 3	0.801	4.822
8108927	RBM27	RNA binding motif protein 27	0.801	6.051
8147483	MTDH	metadherin	0.8	6.08
8134036	STEAP2	STEAP2 metalloreductase	0.8	1.876
7985166	IREB2	iron responsive element binding protein 2	0.799	4.302
8112220	PDE4D	phosphodiesterase 4D	0.799	3.652
7962516	SLC38A1	solute carrier family 38 member 1	0.799	3.334
8135576	TES	testin LIM domain protein	0.799	4.177
7927071	ZNF37A	zinc finger protein 37A	0.799	4.361
7923086	ASPM	abnormal spindle microtubule assembly	0.798	4.325
8108015	HSPA4	heat shock protein family A (Hsp70) member 4	0.798	3.875
8109403	MFAP3	microfibrillar associated protein 3	0.798	3.211
7995382	PHKB	phosphorylase kinase regulatory subunit beta	0.798	4.196
8023043	PSTPIP2	proline-serine-threonine phosphatase interacting protein 2	0.798	4.009
7926356	PTER	phosphotriesterase related	0.798	5.384
8048717	SGPP2	sphingosine-1-phosphate phosphatase 2	0.798	2.082
8113491	STARD4	StAR related lipid transfer domain containing 4	0.798	4.025
8172158	CASK	calcium/calmodulin dependent serine protein kinase	0.797	6.14
7970655	MTMR6	myotubularin related protein 6	0.797	5.134
7901123	NASP	nuclear autoantigenic sperm protein	0.797	4.79
8150988	ASPH	aspartate beta-hydroxylase	0.796	4.876
8109507	ITK	IL2 inducible T-cell kinase	0.796	2.512
8051443	STRN	striatin	0.796	4.512
8025958	ZNF440	zinc finger protein 440	0.796	4.778
7965486	CEP83	centrosomal protein 83	0.795	4.856
8056977	NFE2L2	nuclear factor, erythroid 2 like 2	0.795	4.273
7943218	PANX1	pannexin 1	0.795	2.533
8045090	UGGT1	UDP-glucose glycoprotein glucosyltransferase 1	0.794	4.146
7916969	ZRANB2	zinc finger RANBP2-type containing 2	0.794	4.667
8047815	FASTKD2	FAST kinase domains 2	0.793	4.815
8089652	NAA50	N(alpha)-acetyltransferase 50, NatE catalytic subunit	0.793	5.894
7944560	ARHGEF12	Rho guanine nucleotide exchange factor 12	0.792	3.982
7962013	ERGIC2	ERGIC and golgi 2	0.792	5.949
8129418	PTPRK	protein tyrosine phosphatase, receptor type K	0.792	4.139
7936567	RAB11FIP2	RAB11 family interacting protein 2	0.792	6.496
8147206	RIPK2	receptor interacting serine/threonine kinase 2	0.792	3.683
8021924	THOC1	THO complex 1	0.791	4.969
7987325	AQR	aquarius intron-binding spliceosomal factor	0.79	4.31
8091658	CCNL1	cyclin L1	0.79	3.348
8142194	LAMB1	laminin subunit beta 1	0.79	2.579
8127854	ME1	malic enzyme 1	0.79	4.411
7953211	TIGAR	TP53 induced glycolysis regulatory phosphatase	0.79	4.254
7987361	ZNF770	zinc finger protein 770	0.79	5.344
8048733	ACSL3	acyl-CoA synthetase long-chain family member 3	0.789	4.333
7917516	GBP1P1///GBP3///GBP1	guanylate binding protein 1 pseudogene 1///guanylate binding protein 3///guanylate binding protein 1	0.789	1.95
7958379	PWP1	PWP1 homolog, endonuclein	0.789	4.001
8040173	TAF1B	TATA-box binding protein associated factor, RNA polymerase I subunit B	0.789	4.883
8180405	ARL4A	ADP ribosylation factor like GTPase 4A	0.788	4.649
8090817	C3orf36	chromosome 3 open reading frame 36	0.788	2.161
8169272	ATG4A	autophagy related 4A cysteine peptidase	0.787	4.777
8152340	NUDCD1	NudC domain containing 1	0.787	3.614
8138401	SNX13	sorting nexin 13	0.787	5.134
8120102	CD2AP	CD2 associated protein	0.786	5.967
8135235	PMPCB	peptidase, mitochondrial processing beta subunit	0.786	5.72
7943605	ACAT1	acetyl-CoA acetyltransferase 1	0.785	4.774
8089999	KPNA1	karyopherin subunit alpha 1	0.785	4.412
7957052	CCT2	chaperonin containing TCP1 subunit 2	0.784	4.473
8152703	FBXO32	F-box protein 32	0.784	3.143
7973770	SCFD1	sec1 family domain containing 1	0.784	5.323
7984641	ARIH1	ariadne RBR E3 ubiquitin protein ligase 1	0.783	5.604
7995574	HNRNPA1P6///HNRNPA1P33///HNRNPA1P27///HNRNPA1P10///HNRNPA1L2///HNRNPA1	heterogeneous nuclear ribonucleoprotein A1 pseudogene 6///heterogeneous nuclear ribonucleoprotein A1 pseudogene 33///heterogeneous nuclear ribonucleoprotein A1 pseudogene 27///heterogeneous nuclear ribonucleoprotein A1 pseudogene 10///heterogeneous nuclear ribonucleoprotein A1-like 2///heterogeneous nuclear ribonucleoprotein A1	0.783	4.291
8124144	DEK	DEK proto-oncogene	0.782	5.33
8122013	L3MBTL3	l(3)mbt-like 3 (Drosophila)	0.782	3.906
8097356	PLK4	polo like kinase 4	0.782	4.635
8009075	TANC2	tetratricopeptide repeat, ankyrin repeat and coiled-coil containing 2	0.782	3.15
8174322	MORC4	MORC family CW-type zinc finger 4	0.781	3.857
8085914	SLC4A7	solute carrier family 4 member 7	0.781	5.091
7980463	SNW1	SNW domain containing 1	0.781	3.941
8154765	DNAJA1	DnaJ heat shock protein family (Hsp40) member A1	0.78	2.659
8127756	LCA5	LCA5, lebercilin	0.78	6.901
7926283	PRPF18	pre-mRNA processing factor 18	0.78	3.824
8079198	ZNF660	zinc finger protein 660	0.78	4.665
8107005	CAST	calpastatin	0.779	4.73
7962537	SLC38A2	solute carrier family 38 member 2	0.779	4.546
8000156	SMG1P3///SMG1P1///SMG1P5///SMG1	SMG1P3, nonsense mediated mRNA decay associated PI3K related kinase pseudogene 3///SMG1P1, nonsense mediated mRNA decay associated PI3K related kinase pseudogene 1///SMG1P5, nonsense mediated mRNA decay associated PI3K related kinase pseudogene 5///SMG1, nonsense mediated mRNA decay associated PI3K related kinase	0.779	3.398
8006239	NF1	neurofibromin 1	0.778	3.996
8169473	PLS3	plastin 3	0.778	3.66
8120758	SENP6	SUMO1/sentrin specific peptidase 6	0.778	6.132
8081055	CHMP2B	charged multivesicular body protein 2B	0.777	5.555
7904000	DDX20	DEAD-box helicase 20	0.777	6.35
7973756	G2E3	G2/M-phase specific E3 ubiquitin protein ligase	0.777	4.608
8084589	MAP3K13	mitogen-activated protein kinase kinase kinase 13	0.777	3.764
7908421	TROVE2	TROVE domain family member 2	0.777	4.019
7905099	VPS45	vacuolar protein sorting 45 homolog	0.777	3.708
7970763	FLT1	fms related tyrosine kinase 1	0.776	2.178
8007992	KPNB1	karyopherin subunit beta 1	0.776	3.675
7910706	LGALS8	galectin 8	0.776	3.267
8102482	SEC24D	SEC24 homolog D, COPII coat complex component	0.776	4.143
8055890	STAM2	signal transducing adaptor molecule 2	0.776	4.681
8123137	ACAT2	acetyl-CoA acetyltransferase 2	0.775	2.922
7909708	CENPF	centromere protein F	0.775	5.804
8145570	ESCO2	establishment of sister chromatid cohesion N-acetyltransferase 2	0.775	6.91
7904881	PDIA3P1///PDIA3	protein disulfide isomerase family A member 3 pseudogene 1///protein disulfide isomerase family A member 3	0.775	4.747
8089627	SPICE1	spindle and centriole associated protein 1	0.775	3.43
8081740	ATP6V1A	ATPase H+ transporting V1 subunit A	0.774	3.691
8095163	EXOC1	exocyst complex component 1	0.774	3.348
7936578	FAM204A	family with sequence similarity 204 member A	0.774	4.758
8049199	GIGYF2	GRB10 interacting GYF protein 2	0.774	3.989
8097388	LARP1B	La ribonucleoprotein domain family member 1B	0.774	7.424
8170428	MTM1	myotubularin 1	0.774	4.7
7989224	ADAM10	ADAM metallopeptidase domain 10	0.773	4.027
8107282	WDR36	WD repeat domain 36	0.773	3.984
8105481	GAPT	GRB2-binding adaptor protein, transmembrane	0.771	3.676
7982712	KNSTRN	kinetochore localized astrin/SPAG5 binding protein	0.771	2.77
7948898	SNHG1///SNORD31	small nucleolar RNA host gene 1///small nucleolar RNA, C/D box 31	0.771	3.283
8131666	ITGB8	integrin subunit beta 8	0.77	2.357
7973924	KIAA0391	KIAA0391	0.77	4.266
8008885	MIR21	microRNA 21	0.77	2
8105191	PARP8	poly(ADP-ribose) polymerase family member 8	0.77	4.412
8046726	SSFA2	sperm specific antigen 2	0.77	3.653
8079217	ZNF35	zinc finger protein 35	0.77	3.476
8004784	ALOX15B	arachidonate 15-lipoxygenase, type B	0.769	2.081
8044818	CFAP221	cilia and flagella associated protein 221	0.769	5.204
7989347	ICE2	interactor of little elongation complex ELL subunit 2	0.769	5.683
7932885	ARHGAP12	Rho GTPase activating protein 12	0.768	4.79
7983704	GLDN	gliomedin	0.768	1.753
7903032	MTF2	metal response element binding transcription factor 2	0.768	4.564
8052307	PPP4R3B	protein phosphatase 4 regulatory subunit 3B	0.768	6.177
8124262	TDP2	tyrosyl-DNA phosphodiesterase 2	0.768	5.023
7943442	DYNC2H1	dynein cytoplasmic 2 heavy chain 1	0.767	4.995
8046346	HAT1	histone acetyltransferase 1	0.767	6.857
8083494	MME	membrane metallo-endopeptidase	0.767	2.116
7995994	RSPRY1	ring finger and SPRY domain containing 1	0.767	4.575
7960158	ZNF10	zinc finger protein 10	0.767	3.78
8180350	BAGE	B melanoma antigen	0.766	5.002
8035793	ZNF737///ZNF737	zinc finger protein 737///zinc finger protein 737	0.766	4.257
8175102	ENOX2	ecto-NOX disulfide-thiol exchanger 2	0.765	4.041
8089314	IFT57	intraflagellar transport 57	0.765	4.187
8149555	PSD3	pleckstrin and Sec7 domain containing 3	0.765	4.821
8157933	ZBTB43	zinc finger and BTB domain containing 43	0.765	3.465
7954036	APOLD1///DDX47	apolipoprotein L domain containing 1///DEAD-box helicase 47	0.764	3.996
8166956	KDM6A	lysine demethylase 6A	0.764	4.344
7903404	RNPC3	RNA binding region (RNP1, RRM) containing 3	0.764	3.689
8161747	ZFAND5	zinc finger AN1-type containing 5	0.764	4.369
8083630	GFM1	G elongation factor mitochondrial 1	0.763	3.667
8155397	ANKRD20A21P///ANKRD20A8P///ANKRD20A4///ANKRD20A2///ANKRD20A3///ANKRD20A5P///ANKRD20A1	ankyrin repeat domain 20 family member A21, pseudogene///ankyrin repeat domain 20 family member A8, pseudogene///ankyrin repeat domain 20 family member A4///ankyrin repeat domain 20 family member A2///ankyrin repeat domain 20 family member A3///ankyrin repeat domain 20 family member A5, pseudogene///ankyrin repeat domain 20 family member A1	0.762	3.072
8101728	FAM13A	family with sequence similarity 13 member A	0.762	3.016
8027292	ZNF431	zinc finger protein 431	0.762	5.2
8066303	CHD6	chromodomain helicase DNA binding protein 6	0.761	3.248
8086555	LZTFL1	leucine zipper transcription factor like 1	0.761	4.533
7903407	RNPC3///AMY2B	RNA binding region (RNP1, RRM) containing 3///amylase, alpha 2B (pancreatic)	0.76	3.151
7934026	DNA2	DNA replication helicase/nuclease 2	0.759	4.705
8116835	GCNT2	glucosaminyl (N-acetyl) transferase 2, I-branching enzyme (I blood group)	0.759	2.189
8093961	KIAA0232	KIAA0232	0.759	4.246
8150599	PRKDC	protein kinase, DNA-activated, catalytic polypeptide	0.759	3.628
8050336	E2F6	E2F transcription factor 6	0.758	4.564
7999532	GSPT1	G1 to S phase transition 1	0.758	4.808
8107691	PHAX	phosphorylated adaptor for RNA export	0.758	5.698
8067295	SLMO2-ATP5E///PRELID3B	SLMO2-ATP5E readthrough///PRELI domain containing 3B	0.757	4.886
7992877	ZNF75A	zinc finger protein 75a	0.757	4.557
8058570	KANSL1L	KAT8 regulatory NSL complex subunit 1 like	0.756	4.714
7922406	SNORD79	small nucleolar RNA, C/D box 79	0.756	2.585
8077513	THUMPD3	THUMP domain containing 3	0.756	4.223
8098084	ETFDH	electron transfer flavoprotein dehydrogenase	0.755	3.555
7900235	MACF1	microtubule-actin crosslinking factor 1	0.755	3.269
8090898	STAG1	stromal antigen 1	0.755	4.909
7916443	USP24	ubiquitin specific peptidase 24	0.755	3.562
8168472	ATP7A	ATPase copper transporting alpha	0.754	4.194
7989750	CILP	cartilage intermediate layer protein	0.754	2.933
8128650	SEC63	SEC63 homolog, protein translocation regulator	0.754	4.905
7910539	SPRTN	SprT-like N-terminal domain	0.754	5.126
8025973	ZNF700	zinc finger protein 700	0.754	3.886
7972737	LIG4	DNA ligase 4	0.753	5.013
8130038	SHPRH	SNF2 histone linker PHD RING helicase	0.753	3.457
8166289	CDKL5	cyclin dependent kinase like 5	0.752	3.455
8021301	RAB27B	RAB27B, member RAS oncogene family	0.752	3.047
8066009	RBM39	RNA binding motif protein 39	0.752	4.994
8054804	CCDC93	coiled-coil domain containing 93	0.751	3.96
8051413	FAM98A	family with sequence similarity 98 member A	0.751	3.213
8001876	NAE1	NEDD8 activating enzyme E1 subunit 1	0.751	6.469
8156945	RNF20	ring finger protein 20	0.751	4.997
8094848	SLC30A9	solute carrier family 30 member 9	0.751	4.078
7902891	ZNF326	zinc finger protein 326	0.751	5.569
8112687	COL4A3BP	collagen type IV alpha 3 binding protein	0.75	5.261
8132070	GARS	glycyl-tRNA synthetase	0.75	3.853
8156521	MIRLET7F1	microRNA let-7f-1	0.75	2.943
7901804	PATJ	PATJ, crumbs cell polarity complex component	0.75	3.42
7947040	SPTY2D1	SPT2 chromatin protein domain containing 1	0.75	3.947
8152453	TRPS1	transcriptional repressor GATA binding 1	0.75	2.952
8098328	GALNT7	polypeptide N-acetylgalactosaminyltransferase 7	0.749	4.037
7925257	LYST	lysosomal trafficking regulator	0.749	3.024
8083094	RASA2	RAS p21 protein activator 2	0.749	4.382
8095545	RUFY3	RUN and FYVE domain containing 3	0.749	4.446
8092095	TNIK	TRAF2 and NCK interacting kinase	0.749	3.602
7960143	ZNF84	zinc finger protein 84	0.749	3.547
8016324	CDC27	cell division cycle 27	0.748	4.645
8127646	FILIP1	filamin A interacting protein 1	0.748	3.791
7960221	KDM5A	lysine demethylase 5A	0.748	3.649
8106193	UTP15	UTP15, small subunit processome component	0.748	3.747
7967900	ZMYM2	zinc finger MYM-type containing 2	0.748	5.207
8170971	DKC1	dyskerin pseudouridine synthase 1	0.747	3.844
7937020	MKI67	marker of proliferation Ki-67	0.747	3.919
8174598	IL13RA2	interleukin 13 receptor subunit alpha 2	0.746	4.585
8097792	SNORD73A///RPS3A	small nucleolar RNA, C/D box 73A///ribosomal protein S3A	0.746	3.653
8013671	SPAG5	sperm associated antigen 5	0.746	6.353
7917199	TTLL7	tubulin tyrosine ligase like 7	0.746	4.512
8132943	CCT6A	chaperonin containing TCP1 subunit 6A	0.745	3.35
7948896	SNHG1///SNORD22	small nucleolar RNA host gene 1///small nucleolar RNA, C/D box 22	0.745	3.552
7968835	AKAP11	A-kinase anchoring protein 11	0.744	2.812
7951372	CASP4	caspase 4	0.744	3.424
8056343	COBLL1	cordon-bleu WH2 repeat protein like 1	0.744	4.87
8142143	COG5	component of oligomeric golgi complex 5	0.744	3.647
8017776	HELZ	helicase with zinc finger	0.744	4.807
8077499	LINC00312	long intergenic non-protein coding RNA 312	0.744	2.274
8147848	OXR1	oxidation resistance 1	0.744	4.338
8057599	TFPI	tissue factor pathway inhibitor	0.744	3.663
8163023	IKBKAP	inhibitor of kappa light polypeptide gene enhancer in B-cells, kinase complex-associated protein	0.743	3.128
8082869	PPP2R3A	protein phosphatase 2 regulatory subunit B''alpha	0.743	4.074
8135218	LRRC17	leucine rich repeat containing 17	0.742	2.116
8124059	NUP153	nucleoporin 153	0.742	4.481
8152988	SLA	Src-like-adaptor	0.742	2.966
8133089	ZNF92	zinc finger protein 92	0.742	6.529
7969228	ALG11///UTP14C	ALG11, alpha-1,2-mannosyltransferase///UTP14, small subunit processome component homolog C (S. cerevisiae)	0.741	3.125
7962085	IPO8	importin 8	0.741	3.221
7969493	SCEL	sciellin	0.741	2.763
7965769	SLC5A8	solute carrier family 5 member 8	0.741	1.932
8046201	SSB	Sjogren syndrome antigen B	0.741	4.884
8152656	ZHX1-C8orf76///ZHX1	ZHX1-C8orf76 readthrough///zinc fingers and homeoboxes 1	0.741	5.339
8081564	CD96	CD96 molecule	0.74	3.37
7988537	CEP152	centrosomal protein 152	0.74	4.614
8105612	CWC27	CWC27 spliceosome associated protein homolog	0.74	5.291
7924327	GPATCH2	G-patch domain containing 2	0.74	4.693
7971461	LCP1	lymphocyte cytosolic protein 1	0.74	2.885
8103106	LRBA	LPS responsive beige-like anchor protein	0.74	3.26
8068289	SON	SON DNA binding protein	0.74	3.262
8174103	GK3P///GK	glycerol kinase 3 pseudogene///glycerol kinase	0.739	2.177
8041888	MSH6	mutS homolog 6	0.739	3.476
8099926	PDS5A	PDS5 cohesin associated factor A	0.739	5.614
7916669	DOCK7	dedicator of cytokinesis 7	0.738	4.568
8152133	RRM2B	ribonucleotide reductase regulatory TP53 inducible subunit M2B	0.738	5.227
7931168	ACADSB	acyl-CoA dehydrogenase, short/branched chain	0.737	3.08
7966046	MTERF2	mitochondrial transcription termination factor 2	0.737	4.278
7942174	PPFIA1	PTPRF interacting protein alpha 1	0.737	4.75
8063242	ARFGEF2	ADP ribosylation factor guanine nucleotide exchange factor 2	0.736	3.257
7989037	DYX1C1-CCPG1///CCPG1	DYX1C1-CCPG1 readthrough (NMD candidate)///cell cycle progression 1	0.736	4.147
7941272	MALAT1	metastasis associated lung adenocarcinoma transcript 1 (non-protein coding)	0.736	4.343
7926836	RAB18	RAB18, member RAS oncogene family	0.736	5.844
8078834	WDR48	WD repeat domain 48	0.736	3.47
8129458	ARHGAP18	Rho GTPase activating protein 18	0.735	3.064
7969935	BIVM-ERCC5///ERCC5	BIVM-ERCC5 readthrough///ERCC excision repair 5, endonuclease	0.735	3.524
8131475	C1GALT1	core 1 synthase, glycoprotein-N-acetylgalactosamine 3-beta-galactosyltransferase 1	0.735	3.805
8045381	CCNT2	cyclin T2	0.735	3.776
8137054	CUL1	cullin 1	0.735	3.988
8108301	KIF20A	kinesin family member 20A	0.735	4.046
7923173	MIR181B1	microRNA 181b-1	0.735	3.012
8042119	PAPOLG	poly(A) polymerase gamma	0.735	3.577
8097628	HHIP	hedgehog interacting protein	0.734	2.655
8083616	MLF1	myeloid leukemia factor 1	0.734	2.56
8060897	PLCB4	phospholipase C beta 4	0.734	2.801
8028200	ZNF567	zinc finger protein 567	0.734	3.938
7909164	CTSE	cathepsin E	0.733	2.24
8084045	MFN1	mitofusin 1	0.733	4.221
7919226	POLR3C	RNA polymerase III subunit C	0.733	5.113
8081343	TRMT10C	tRNA methyltransferase 10C, mitochondrial RNase P subunit	0.733	4.324
7921583	COPA	coatomer protein complex subunit alpha	0.732	3.466
8000329	PALB2	partner and localizer of BRCA2	0.732	4.478
8140668	SEMA3A	semaphorin 3A	0.732	2.605
7973850	AKAP6	A-kinase anchoring protein 6	0.731	3.145
8078248	CTCFL///SP100///HMGB1	CCCTC-binding factor like///SP100 nuclear antigen///high mobility group box 1	0.731	5.85
7917707	EVI5	ecotropic viral integration site 5	0.73	6.282
7974653	KIAA0586	KIAA0586	0.73	4.476
7946105	OR52N5	olfactory receptor family 52 subfamily N member 5	0.729	2.141
7950391	PGM2L1	phosphoglucomutase 2 like 1	0.729	3.32
8055688	RND3	Rho family GTPase 3	0.729	2.506
8108981	STK32A	serine/threonine kinase 32A	0.728	2.448
8110463	ZNF354B	zinc finger protein 354B	0.728	4.274
8136095	AHCYL2	adenosylhomocysteinase like 2	0.727	3.014
7982620	EIF2AK4	eukaryotic translation initiation factor 2 alpha kinase 4	0.727	2.85
8126860	MUT	methylmalonyl-CoA mutase	0.727	3.545
7956658	SLC16A7	solute carrier family 16 member 7	0.727	3.242
8180327	BAGE3	B melanoma antigen family member 3	0.726	5.296
7931062	BTBD16	BTB domain containing 16	0.726	2.728
7928800	CCSER2	coiled-coil serine rich protein 2	0.726	5.115
8141094	PDK4	pyruvate dehydrogenase kinase 4	0.726	2.406
8131550	SCIN	scinderin	0.726	4.038
8122672	TAB2	TGF-beta activated kinase 1/MAP3K7 binding protein 2	0.726	4.154
8099449	FBXL5	F-box and leucine rich repeat protein 5	0.725	4.475
8007919	LRRC37A2///LRRC37A6P///LRRC37A3///LRRC37A4P///LRRC37A	leucine rich repeat containing 37 member A2///leucine rich repeat containing 37 member A6, pseudogene///leucine rich repeat containing 37 member A3///leucine rich repeat containing 37 member A4, pseudogene///leucine rich repeat containing 37A	0.725	2.323
8063211	NCOA3	nuclear receptor coactivator 3	0.725	2.78
7989094	NEDD4	neural precursor cell expressed, developmentally down-regulated 4, E3 ubiquitin protein ligase	0.725	3.734
8115814	SH3PXD2B	SH3 and PX domains 2B	0.725	2.441
8058940	USP37	ubiquitin specific peptidase 37	0.725	4.493
8048146	XRCC5	X-ray repair cross complementing 5	0.725	3.418
7988970	FAM214A	family with sequence similarity 214 member A	0.724	4.596
8059319	FARSB	phenylalanyl-tRNA synthetase beta subunit	0.723	3.671
8157858	GAPVD1	GTPase activating protein and VPS9 domains 1	0.723	4.312
7982957	MGA	MGA, MAX dimerization protein	0.723	3.225
8094278	NCAPG	non-SMC condensin I complex subunit G	0.723	5.268
8130374	FBXO5	F-box protein 5	0.722	4.943
7980246	MLH3	mutL homolog 3	0.722	2.844
8081386	NFKBIZ	NFKB inhibitor zeta	0.722	3.183
7907310	PRRC2C	proline rich coiled-coil 2C	0.722	4.327
7932637	ANKRD26	ankyrin repeat domain 26	0.721	5.202
7907104	DCAF6	DDB1 and CUL4 associated factor 6	0.721	5.071
8083523	GMPS	guanine monophosphate synthase	0.721	5.014
8130087	PPIL4	peptidylprolyl isomerase like 4	0.721	6.067
7913814	SYF2	SYF2 pre-mRNA splicing factor	0.721	4.094
8078600	TCEA1	transcription elongation factor A1	0.721	7.561
8083333	EIF2A	eukaryotic translation initiation factor 2A	0.72	4.584
8170326	FMR1	fragile X mental retardation 1	0.72	4.291
7957850	GAS2L3	growth arrest specific 2 like 3	0.72	2.914
7955890	HNRNPA1	heterogeneous nuclear ribonucleoprotein A1	0.72	2.973
8119993	HSP90AB1	heat shock protein 90 alpha family class B member 1	0.72	3.777
7936826	IKZF5	IKAROS family zinc finger 5	0.72	5.532
8105545	IPO11	importin 11	0.72	3.565
8021418	MALT1	MALT1 paracaspase	0.72	4.974
8103289	PLRG1	pleiotropic regulator 1	0.72	4.722
7907492	RABGAP1L	RAB GTPase activating protein 1 like	0.72	3.235
8052626	VPS54	VPS54, GARP complex subunit	0.72	4.993
8147156	WWP1	WW domain containing E3 ubiquitin protein ligase 1	0.72	4.164
8154531	DENND4C	DENN domain containing 4C	0.719	4.208
8022393	PTPN2	protein tyrosine phosphatase, non-receptor type 2	0.719	3.783
8162117	GOLM1	golgi membrane protein 1	0.718	4.599
7970381	LOC102725104///ANKRD20A8P	putative ankyrin repeat domain-containing protein 20A12 pseudogene///ankyrin repeat domain 20 family member A8, pseudogene	0.718	2.312
7958275	POLR3B	RNA polymerase III subunit B	0.718	4.225
7928444	VCL	vinculin	0.718	2.246
7957386	ACSS3	acyl-CoA synthetase short-chain family member 3	0.717	3.409
7919715	ANP32E	acidic nuclear phosphoprotein 32 family member E	0.717	6.999
8068305	ITSN1	intersectin 1	0.717	5.001
8061772	MAPRE1	microtubule associated protein RP/EB family member 1	0.717	3.575
7974146	PRPF39	pre-mRNA processing factor 39	0.717	5.286
7936529	SHTN1	shootin 1	0.717	5.614
8169683	ZBTB33	zinc finger and BTB domain containing 33	0.717	4.539
8046604	AGPS	alkylglycerone phosphate synthase	0.716	5.266
7938951	ANO5	anoctamin 5	0.716	3.495
7934301	ECD	ecdysoneless cell cycle regulator	0.716	4.043
7966462	NAA25	N(alpha)-acetyltransferase 25, NatB auxiliary subunit	0.716	3.973
7907657	RALGPS2	Ral GEF with PH domain and SH3 binding motif 2	0.716	4.539
7916836	SERBP1	SERPINE1 mRNA binding protein 1	0.716	4.765
8104422	MTRR	5-methyltetrahydrofolate-homocysteine methyltransferase reductase	0.715	2.085
8028248	ZNF570	zinc finger protein 570	0.715	5.261
8062211	RPF2	ribosome production factor 2 homolog	0.714	4.453
8173629	ABCB7	ATP binding cassette subfamily B member 7	0.713	3.692
7962112	CAPRIN2	caprin family member 2	0.713	3.45
7906900	DDR2	discoidin domain receptor tyrosine kinase 2	0.713	2.683
7904853	GPR89A///GPR89B	G protein-coupled receptor 89A///G protein-coupled receptor 89B	0.713	4.418
8103011	OTUD4	OTU deubiquitinase 4	0.713	4.04
8092201	TBL1XR1	transducin (beta)-like 1 X-linked receptor 1	0.713	5.512
7918725	TRIM33	tripartite motif containing 33	0.713	5.384
8147994	UTP23	UTP23, small subunit processome component	0.713	5.206
7917850	ARHGAP29	Rho GTPase activating protein 29	0.712	2.27
8017262	BRIP1	BRCA1 interacting protein C-terminal helicase 1	0.712	7.115
8146579	CHD7	chromodomain helicase DNA binding protein 7	0.712	4.537
8022473	ESCO1	establishment of sister chromatid cohesion N-acetyltransferase 1	0.712	5.8
8098103	FNIP2	folliculin interacting protein 2	0.712	3.26
8154416	CCDC171	coiled-coil domain containing 171	0.711	5.106
7951686	IL18	interleukin 18	0.711	2.435
8161865	PRUNE2	prune homolog 2	0.711	2.952
8124280	FAM65B	family with sequence similarity 65 member B	0.71	2.225
8052742	FBXO48	F-box protein 48	0.71	4.765
7904340	MAN1A2	mannosidase alpha class 1A member 2	0.71	5.497
7925792	ZMYND11	zinc finger MYND-type containing 11	0.71	3.955
8100026	ATP8A1	ATPase phospholipid transporting 8A1	0.709	2.936
7969060	FNDC3A	fibronectin type III domain containing 3A	0.709	5.021
7903188	PTBP2	polypyrimidine tract binding protein 2	0.709	4.288
8101624	KLHL8	kelch like family member 8	0.708	4.424
7909285	PFKFB2	6-phosphofructo-2-kinase/fructose-2,6-biphosphatase 2	0.708	3.258
8105633	PPWD1	peptidylprolyl isomerase domain and WD repeat containing 1	0.708	3.51
8106784	RASA1	RAS p21 protein activator 1	0.708	3.839
7948906	SNHG1///SNORD27	small nucleolar RNA host gene 1///small nucleolar RNA, C/D box 27	0.708	2.127
8139840	ERV3-1	endogenous retrovirus group 3 member 1	0.707	2.665
8057719	HIBCH	3-hydroxyisobutyryl-CoA hydrolase	0.707	3.94
8146468	RP1	retinitis pigmentosa 1 (autosomal dominant)	0.707	2.116
7922412	SNORD77	small nucleolar RNA, C/D box 77	0.707	1.968
8030997	ZNF813	zinc finger protein 813	0.707	5.27
8145293	ADAM28	ADAM metallopeptidase domain 28	0.706	2.945
7928471	ADK	adenosine kinase	0.706	4.348
8023497	ATP8B1	ATPase phospholipid transporting 8B1	0.706	3.09
8133976	DBF4	DBF4 zinc finger	0.706	2.849
7978932	SOS2	SOS Ras/Rho guanine nucleotide exchange factor 2	0.706	6.844
8019046	EIF4A3	eukaryotic translation initiation factor 4A3	0.705	3.362
7965048	NAP1L1	nucleosome assembly protein 1 like 1	0.705	4.299
8031650	ZNF471	zinc finger protein 471	0.705	3.707
8098707	HSP90AA4P	heat shock protein 90 alpha family class A member 4, pseudogene	0.704	4.677
7939434	TTC17	tetratricopeptide repeat domain 17	0.704	3.231
8119529	UBR2	ubiquitin protein ligase E3 component n-recognin 2	0.704	4.116
8024532	ZNF57	zinc finger protein 57	0.704	4.41
8128043	CNR1	cannabinoid receptor 1	0.703	2.694
8097066	METTL14	methyltransferase like 14	0.703	4.487
8017810	PSMD12	proteasome 26S subunit, non-ATPase 12	0.703	4.774
7969017	RB1	RB transcriptional corepressor 1	0.703	5.418
7917255	SSX2IP	SSX family member 2 interacting protein	0.703	4.494
8097570	USP38	ubiquitin specific peptidase 38	0.703	5.103
8038952	ZNF616	zinc finger protein 616	0.703	4.61
8149942	CCDC25	coiled-coil domain containing 25	0.702	3.935
8067206	CTCFL	CCCTC-binding factor like	0.702	5.911
7925565	HNRNPU	heterogeneous nuclear ribonucleoprotein U	0.702	4.33
7946365	STK33	serine/threonine kinase 33	0.702	2.681
8043995	IL1R1	interleukin 1 receptor type 1	0.701	2.816
7902861	LRRC8B	leucine rich repeat containing 8 family member B	0.701	3.374
7967386	MPHOSPH9	M-phase phosphoprotein 9	0.701	4.392
8045514	SPOPL	speckle type BTB/POZ protein like	0.701	4.472
8146544	UBXN2B	UBX domain protein 2B	0.701	4.169
8000028	DCUN1D3	defective in cullin neddylation 1 domain containing 3	0.7	2.945
8070097	DNAJC28	DnaJ heat shock protein family (Hsp40) member C28	0.7	5.68
8131519	PHF14	PHD finger protein 14	0.7	4.816
8171901	TAB3	TGF-beta activated kinase 1/MAP3K7 binding protein 3	0.7	5.042
8114470	LRRTM2	leucine rich repeat transmembrane neuronal 2	0.699	3.298
8083757	NMD3	NMD3 ribosome export adaptor	0.699	4.19
7908553	PTPRC	protein tyrosine phosphatase, receptor type C	0.699	3.183
7902425	ST6GALNAC3	ST6 N-acetylgalactosaminide alpha-2,6-sialyltransferase 3	0.699	3.444
7979179	ERO1A	endoplasmic reticulum oxidoreductase 1 alpha	0.698	5.02
7988687	GABPB1	GA binding protein transcription factor beta subunit 1	0.698	3.94
8128260	MAP3K7	mitogen-activated protein kinase kinase kinase 7	0.698	4.837
8081590	PHLDB2	pleckstrin homology like domain family B member 2	0.698	3.687
8108510	ANKHD1-EIF4EBP3///ANKHD1///EIF4EBP3///ANKHD1-EIF4EBP3///ANKHD1///EIF4EBP3	ANKHD1-EIF4EBP3 readthrough///ankyrin repeat and KH domain containing 1///eukaryotic translation initiation factor 4E binding protein 3///ANKHD1-EIF4EBP3 readthrough///ankyrin repeat and KH domain containing 1///eukaryotic translation initiation factor 4E binding protein 3	0.697	4.164
8070341	BRWD1	bromodomain and WD repeat domain containing 1	0.697	4.814
7958158	HCFC2	host cell factor C2	0.697	3.445
8100714	YTHDC1	YTH domain containing 1	0.697	4.672
8094911	ATP10D	ATPase phospholipid transporting 10D (putative)	0.696	2.437
8096425	CCSER1	coiled-coil serine rich protein 1	0.696	4.263
8132843	HAUS6	HAUS augmin like complex subunit 6	0.696	3.505
8055445	DARS	aspartyl-tRNA synthetase	0.695	4.486
7956697	MON2	MON2 homolog, regulator of endosome-to-Golgi trafficking	0.695	3.801
7999496	ZC3H7A	zinc finger CCCH-type containing 7A	0.695	4.668
8025945	ZNF441	zinc finger protein 441	0.695	3.402
7972369	UGGT2	UDP-glucose glycoprotein glucosyltransferase 2	0.694	4.582
8097543	ZNF330	zinc finger protein 330	0.694	3.84
7931268	BCCIP	BRCA2 and CDKN1A interacting protein	0.693	4.666
8093191	DLG1	discs large MAGUK scaffold protein 1	0.693	4.817
8150036	KIF13B	kinesin family member 13B	0.693	5.656
7959408	KNTC1	kinetochore associated 1	0.693	4.674
8023191	SMAD2	SMAD family member 2	0.693	3.028
7922610	ABL2	ABL proto-oncogene 2, non-receptor tyrosine kinase	0.692	2.667
7994006	BOLA2-SMG1P6///SMG1P3///SMG1P1///SMG1P5///BOLA2///SMG1P2///SMG1	BOLA2-SMG1P6 readthrough///SMG1P3, nonsense mediated mRNA decay associated PI3K related kinase pseudogene 3///SMG1P1, nonsense mediated mRNA decay associated PI3K related kinase pseudogene 1///SMG1P5, nonsense mediated mRNA decay associated PI3K related kinase pseudogene 5///bolA family member 2///SMG1P2, nonsense mediated mRNA decay associated PI3K related kinase pseudogene 2///SMG1, nonsense me…	0.692	3.65
8160622	SMU1	DNA replication regulator and spliceosomal factor	0.692	3.583
7958346	TMEM263	transmembrane protein 263	0.692	7.495
7968800	DGKH	diacylglycerol kinase eta	0.691	3.505
7940153	FAM111A	family with sequence similarity 111 member A	0.691	2.477
7971692	INTS6	integrator complex subunit 6	0.691	3.558
8162276	NFIL3	nuclear factor, interleukin 3 regulated	0.691	2.036
8091600	PLCH1	phospholipase C eta 1	0.691	3.381
7978628	PPP2R3C	protein phosphatase 2 regulatory subunit B''gamma	0.691	5.914
8109802	RARS	arginyl-tRNA synthetase	0.691	5.146
7965541	FGD6	FYVE, RhoGEF and PH domain containing 6	0.689	3.426
7950810	SYTL2	synaptotagmin like 2	0.689	4.842
8106730	XRCC4	X-ray repair cross complementing 4	0.689	4.39
8116494	ZFP62	ZFP62 zinc finger protein	0.689	2.984
8129181	GOPC	golgi associated PDZ and coiled-coil motif containing	0.688	3.876
8052143	GPR75	G protein-coupled receptor 75	0.688	2.859
7932966	ITGB1	integrin subunit beta 1	0.688	3.469
8091550	KIAA1328	KIAA1328	0.688	2.777
8146863	SULF1	sulfatase 1	0.688	3.187
7944195	UBE4A	ubiquitination factor E4A	0.688	2.828
8154449	CNTLN	centlein	0.687	4.058
7969438	LMO7	LIM domain 7	0.687	4.379
7940259	MS4A14///MS4A7	membrane spanning 4-domains A14///membrane spanning 4-domains A7	0.687	1.863
8154793	NFX1	nuclear transcription factor, X-box binding 1	0.687	3.358
8088065	SFMBT1	Scm-like with four mbt domains 1	0.687	4.827
7927972	VPS26A	VPS26, retromer complex component A	0.687	6.287
8001149	VPS35	VPS35 retromer complex component	0.687	3.145
8022118	EPB41L3	erythrocyte membrane protein band 4.1 like 3	0.686	3.251
7920839	RIT1	Ras like without CAAX 1	0.686	3.639
8027674	ZNF302	zinc finger protein 302	0.686	3.494
7943842	C11orf57	chromosome 11 open reading frame 57	0.685	5.407
8094876	GUF1///GUF1	GUF1 homolog, GTPase///GUF1 homolog, GTPase	0.685	5.246
8130580	SNORA29	small nucleolar RNA, H/ACA box 29	0.685	2.844
8169949	STK26	serine/threonine protein kinase 26	0.685	3.146
8123129	WTAP	Wilms tumor 1 associated protein	0.685	3.275
8027260	ZNF486	zinc finger protein 486	0.685	4.465
8136293	EXOC4	exocyst complex component 4	0.684	2.963
8166104	OFD1	OFD1, centriole and centriolar satellite protein	0.684	3.744
7957072	RAB3IP	RAB3A interacting protein	0.684	4.502
8044613	CBWD6///CBWD3///CBWD5///CBWD2///CBWD1///CBWD6///CBWD3///CBWD5///CBWD1	COBW domain containing 6///COBW domain containing 3///COBW domain containing 5///COBW domain containing 2///COBW domain containing 1///COBW domain containing 6///COBW domain containing 3///COBW domain containing 5///COBW domain containing 1	0.683	4.326
7924119	INTS7	integrator complex subunit 7	0.683	3.84
8129522	MED23	mediator complex subunit 23	0.683	3.385
7962427	PUS7L	pseudouridylate synthase 7 like	0.683	3.753
7983502	BLOC1S6	biogenesis of lysosomal organelles complex 1 subunit 6	0.682	5.374
7982904	RTF1	RTF1 homolog, Paf1/RNA polymerase II complex component	0.682	4.206
8057771	STAT4	signal transducer and activator of transcription 4	0.682	3.25
8156826	TGFBR1	transforming growth factor beta receptor 1	0.682	3.743
7920766	ASH1L	ASH1 like histone lysine methyltransferase	0.681	4.447
8072015	GRK3	G protein-coupled receptor kinase 3	0.681	3.971
8102389	ZGRF1	zinc finger GRF-type containing 1	0.681	4.346
8130408	IPCEF1///CNKSR3	interaction protein for cytohesin exchange factors 1///CNKSR family member 3	0.68	4.529
8160487	PLAA	phospholipase A2 activating protein	0.68	5.446
7924582	WDR26	WD repeat domain 26	0.68	5.941
7960150	ZNF140	zinc finger protein 140	0.68	4.367
8096617	BANK1	B-cell scaffold protein with ankyrin repeats 1	0.679	4.524
8111629	NUP155	nucleoporin 155	0.679	5.631
8166525	POLA1	DNA polymerase alpha 1, catalytic subunit	0.679	3.986
7968232	SNORD102	small nucleolar RNA, C/D box 102	0.679	4.381
8046461	ZAK	sterile alpha motif and leucine zipper containing kinase AZK	0.679	3.161
8114080	GDF9	growth differentiation factor 9	0.678	2.252
7975416	PCNX1	pecanex homolog 1 (Drosophila)	0.678	3.673
7948908	SNHG1///SNORD26	small nucleolar RNA host gene 1///small nucleolar RNA, C/D box 26	0.678	2.181
8095854	2023-09-11	septin 11	0.677	2.731
7927108	BMS1	BMS1, ribosome biogenesis factor	0.677	5.015
8110522	CANX	calnexin	0.677	3.953
8141076	PON2	paraoxonase 2	0.677	3.833
7908204	HMCN1	hemicentin 1	0.676	2.407
8097857	MND1	meiotic nuclear divisions 1	0.676	3.213
8033754	ZNF266	zinc finger protein 266	0.676	3.032
7961964	ASUN	asunder, spermatogenesis regulator	0.675	4.869
8069565	BTG3	BTG anti-proliferation factor 3	0.675	3.594
7925342	ERO1B	endoplasmic reticulum oxidoreductase 1 beta	0.675	2.748
7916562	HNRNPA1P6///HNRNPA1P10///HNRNPA1L2///HNRNPA1	heterogeneous nuclear ribonucleoprotein A1 pseudogene 6///heterogeneous nuclear ribonucleoprotein A1 pseudogene 10///heterogeneous nuclear ribonucleoprotein A1-like 2///heterogeneous nuclear ribonucleoprotein A1	0.675	3.957
7993310	MKL2	MKL1/myocardin like 2	0.675	2.065
8149448	MSR1	macrophage scavenger receptor 1	0.675	2.084
8180407	NPM1	nucleophosmin	0.675	3.02
7931031	TACC2	transforming acidic coiled-coil containing protein 2	0.675	2.679
7927681	BICC1	BicC family RNA binding protein 1	0.674	3.115
7986068	BLM	Bloom syndrome RecQ like helicase	0.674	5.632
7989073	PRTG	protogenin	0.674	2.273
7976189	PSMC1	proteasome 26S subunit, ATPase 1	0.674	3.346
7999608	RRN3	RRN3 homolog, RNA polymerase I transcription factor	0.674	3.788
8098500	CDKN2AIP	CDKN2A interacting protein	0.673	3.146
8078155	GALNT15	polypeptide N-acetylgalactosaminyltransferase 15	0.673	3.214
8143988	KMT2C	lysine methyltransferase 2C	0.673	4.091
7952522	PUS3	pseudouridylate synthase 3	0.673	3.482
8098379	WDR17	WD repeat domain 17	0.673	2.997
8084541	VPS8///VPS8	VPS8, CORVET complex subunit///VPS8, CORVET complex subunit	0.672	4.03
8117646	ZKSCAN8	zinc finger with KRAB and SCAN domains 8	0.672	3.602
8140037	BAZ1B	bromodomain adjacent to zinc finger domain 1B	0.671	5.041
8041713	PPM1B	protein phosphatase, Mg2+/Mn2+ dependent 1B	0.67	4.971
7902345	TYW3	tRNA-yW synthesizing protein 3 homolog	0.67	4.783
8055980	CYTIP	cytohesin 1 interacting protein	0.669	3.216
7969263	HNRNPA1L2	heterogeneous nuclear ribonucleoprotein A1-like 2	0.669	3.878
7961865	KRAS	KRAS proto-oncogene, GTPase	0.669	5.02
8154254	RIC1	RIC1 homolog, RAB6A GEF complex partner 1	0.669	3.337
8056491	SCN9A	sodium voltage-gated channel alpha subunit 9	0.669	4.569
8100231	TEC	tec protein tyrosine kinase	0.669	4.339
8101511	WDFY3	WD repeat and FYVE domain containing 3	0.669	2.839
8015490	DNAJC7	DnaJ heat shock protein family (Hsp40) member C7	0.668	4.803
7916045	EPS15	epidermal growth factor receptor pathway substrate 15	0.668	4.045
8133030	GABPA	GA binding protein transcription factor alpha subunit	0.668	2.621
8129861	IFNGR1	interferon gamma receptor 1	0.668	3.056
8107234	MAN2A1	mannosidase alpha class 2A member 1	0.668	5.461
8098195	MSMO1	methylsterol monooxygenase 1	0.668	2.045
8031669	ZNF470	zinc finger protein 470	0.668	3.752
8168345	ACRC	acidic repeat containing	0.667	3.657
8000013	ERI2	ERI1 exoribonuclease family member 2	0.667	4.964
8133818	PHTF2	putative homeodomain transcription factor 2	0.667	5.409
8100808	SULT1E1	sulfotransferase family 1E member 1	0.667	1.748
8031825	ZNF587B///ZNF814	zinc finger protein 587B///zinc finger protein 814	0.667	2.544
8103922	CASP3	caspase 3	0.666	4.153
8121429	FIG4	FIG4 phosphoinositide 5-phosphatase	0.666	2.716
8047059	HNRNPCL1///HNRNPC	heterogeneous nuclear ribonucleoprotein C-like 1///heterogeneous nuclear ribonucleoprotein C (C1/C2)	0.666	3.409
8046380	ITGA6	integrin subunit alpha 6	0.666	2.279
8095705	MTHFD2L	methylenetetrahydrofolate dehydrogenase (NADP+ dependent) 2-like	0.666	4.94
8101376	SEC31A	SEC31 homolog A, COPII coat complex component	0.666	4.543
7975459	SIPA1L1	signal induced proliferation associated 1 like 1	0.666	3.238
8051528	CEBPZ	CCAAT/enhancer binding protein zeta	0.665	4.536
7903541	STXBP3	syntaxin binding protein 3	0.665	5.723
8084100	USP13	ubiquitin specific peptidase 13 (isopeptidase T-3)	0.665	3.173
8134219	VPS50	VPS50, EARP/GARPII complex subunit	0.665	4.465
7977693	CHD8	chromodomain helicase DNA binding protein 8	0.664	3.306
8120602	OGFRL1	opioid growth factor receptor like 1	0.664	5.088
8108403	MATR3	matrin 3	0.663	4.778
8043251	PTCD3	pentatricopeptide repeat domain 3	0.663	3.409
7929334	CEP55	centrosomal protein 55	0.662	3.974
8091503	GPR171	G protein-coupled receptor 171	0.662	3.288
8051547	PRKD3	protein kinase D3	0.662	4.55
7900555	CCDC30	coiled-coil domain containing 30	0.661	2.366
8080621	CCDC66	coiled-coil domain containing 66	0.661	4.627
7922410	SNORD44	small nucleolar RNA, C/D box 44	0.661	3.321
8113733	CEP120	centrosomal protein 120	0.66	4.814
8156873	INVS	inversin	0.66	3.765
8136401	NUP205	nucleoporin 205	0.66	3.446
7936559	PDZD8	PDZ domain containing 8	0.66	3.799
7900395	RLF	rearranged L-myc fusion	0.66	3.391
8020267	CEP192	centrosomal protein 192	0.659	3.009
7936322	GPAM	glycerol-3-phosphate acyltransferase, mitochondrial	0.659	1.812
8101013	RCHY1	ring finger and CHY zinc finger domain containing 1	0.659	5.872
8083826	SEC62	SEC62 homolog, preprotein translocation factor	0.659	5.286
8019877	SMCHD1	structural maintenance of chromosomes flexible hinge domain containing 1	0.659	3.15
7951032	SNORA1///TAF1D	small nucleolar RNA, H/ACA box 1///TATA-box binding protein associated factor, RNA polymerase I subunit D	0.659	2.16
8138116	ZNF12	zinc finger protein 12	0.659	3.306
7969096	CDADC1	cytidine and dCMP deaminase domain containing 1	0.658	6.417
8102342	ELOVL6	ELOVL fatty acid elongase 6	0.658	3.958
7925823	GTPBP4	GTP binding protein 4	0.658	3.623
8050128	KIDINS220	kinase D-interacting substrate 220kDa	0.658	2.132
8146550	SDCBP	syndecan binding protein	0.658	4.584
8166730	CYBB	cytochrome b-245 beta chain	0.657	2.699
8054227	REV1	REV1, DNA directed polymerase	0.657	3.717
8038967	ZNF83	zinc finger protein 83	0.657	2.58
8122818	ARMT1	acidic residue methyltransferase 1	0.656	4.646
7933192	HNRNPA3P1	heterogeneous nuclear ribonucleoprotein A3 pseudogene 1	0.656	3.969
7957715	NEDD1	neural precursor cell expressed, developmentally down-regulated 1	0.656	4.049
8169186	TBC1D8B	TBC1 domain family member 8B	0.656	3.4
8095539	UTP3	UTP3, small subunit processome component homolog (S. cerevisiae)	0.656	2.626
8051464	HEATR5B	HEAT repeat containing 5B	0.655	2.58
7921916	RGS5	regulator of G-protein signaling 5	0.655	2.089
7913001	UBR4	ubiquitin protein ligase E3 component n-recognin 4	0.655	2.278
8016858	COIL	coilin	0.654	3.177
8082075	DTX3L	deltex E3 ubiquitin ligase 3L	0.654	2.263
8102817	ELF2	E74 like ETS transcription factor 2	0.654	5.724
8143341	KDM7A	lysine demethylase 7A	0.654	3.286
8096635	NFKB1	nuclear factor kappa B subunit 1	0.654	2.443
8065280	RALGAPA2	Ral GTPase activating protein catalytic alpha subunit 2	0.654	2.303
8049552	RBM44	RNA binding motif protein 44	0.654	2.256
7989132	RFX7	regulatory factor X7	0.654	4.077
7956759	SRGAP1	SLIT-ROBO Rho GTPase activating protein 1	0.654	4.456
8114653	TAF7	TATA-box binding protein associated factor 7	0.654	3.809
8033789	ZNF121	zinc finger protein 121	0.654	5.009
7902367	ACADM	acyl-CoA dehydrogenase, C-4 to C-12 straight chain	0.653	6.671
8050658	ATAD2B	ATPase family, AAA domain containing 2B	0.653	6.089
8131583	BZW2	basic leucine zipper and W2 domains 2	0.653	2.143
7926821	MASTL	microtubule associated serine/threonine kinase like	0.653	3.832
8093156	NCBP2	nuclear cap binding protein subunit 2	0.653	3.667
7901867	USP1	ubiquitin specific peptidase 1	0.653	5.905
7930380	ADD3	adducin 3	0.652	3.142
7974473	FBXO34	F-box protein 34	0.652	3.363
8045835	GALNT5///GALNT5	polypeptide N-acetylgalactosaminyltransferase 5///polypeptide N-acetylgalactosaminyltransferase 5	0.652	1.966
8092021	LRRC31	leucine rich repeat containing 31	0.652	1.762
7915926	STIL	SCL/TAL1 interrupting locus	0.652	5.205
8030950	ZNF701	zinc finger protein 701	0.652	3.004
8120719	CD109	CD109 molecule	0.651	3.237
7903507	FAM102B	family with sequence similarity 102 member B	0.651	3.66
8102162	INTS12	integrator complex subunit 12	0.651	4.57
7971361	NUFIP1	NUFIP1, FMR1 interacting protein 1	0.651	4.053
8088820	RYBP	RING1 and YY1 binding protein	0.651	4.219
8065018	TASP1	taspase 1	0.651	6.796
8130505	EZR///ROS1	ezrin///ROS proto-oncogene 1, receptor tyrosine kinase	0.65	2.512
7902565	ADGRL2	adhesion G protein-coupled receptor L2	0.649	1.814
8166157	BMX	BMX non-receptor tyrosine kinase	0.649	2.893
8121588	DSE	dermatan sulfate epimerase	0.649	2.545
8103415	FAM198B	family with sequence similarity 198 member B	0.649	1.879
8135378	PRKAR2B	protein kinase cAMP-dependent type II regulatory subunit beta	0.649	3.355
8121825	RNF217	ring finger protein 217	0.649	4.567
8166219	SYAP1	synapse associated protein 1	0.649	5.529
8151561	ZFAND1	zinc finger AN1-type containing 1	0.649	5.281
7927710	CDK1	cyclin dependent kinase 1	0.648	4.297
8108378	CTNNA1	catenin alpha 1	0.648	2.646
7979307	DLGAP5	DLG associated protein 5	0.648	4.915
8089584	NEPRO	nucleolus and neural progenitor protein	0.648	6.081
7908351	PLA2G4A	phospholipase A2 group IVA	0.648	4.134
8058221	TRAK2	trafficking kinesin protein 2	0.648	2.8
7974029	TTC6	tetratricopeptide repeat domain 6	0.648	4.26
8052233	CLHC1	clathrin heavy chain linker domain containing 1	0.647	3.734
7929061	IFIT1B	interferon induced protein with tetratricopeptide repeats 1B	0.647	2.237
8169598	ZCCHC12	zinc finger CCHC-type containing 12	0.647	3.443
8124502	ZNF184	zinc finger protein 184	0.647	4.199
7903119	ABCD3	ATP binding cassette subfamily D member 3	0.646	3.314
7989323	BNIP2	BCL2 interacting protein 2	0.646	4.722
8059905	COL6A3	collagen type VI alpha 3 chain	0.645	1.879
7936949	DHX32	DEAH-box helicase 32 (putative)	0.645	3.274
7931873	GDI2	GDP dissociation inhibitor 2	0.645	3.319
7916910	LRRC40	leucine rich repeat containing 40	0.645	4.92
7983335	CTDSPL2	CTD small phosphatase like 2	0.644	4.631
7939137	EIF3M	eukaryotic translation initiation factor 3 subunit M	0.644	4.524
7927536	NCOA4	nuclear receptor coactivator 4	0.644	3.281
8146794	PREX2	phosphatidylinositol-3,4,5-trisphosphate dependent Rac exchange factor 2	0.644	2.135
8146000	ADAM9	ADAM metallopeptidase domain 9	0.643	4.112
7957106	CNOT2	CCR4-NOT transcription complex subunit 2	0.643	4.562
7927146	CSGALNACT2	chondroitin sulfate N-acetylgalactosaminyltransferase 2	0.643	4.856
8112274	ELOVL7	ELOVL fatty acid elongase 7	0.643	4.782
8133788	PTPN12	protein tyrosine phosphatase, non-receptor type 12	0.643	4.691
8089867	RABL3	RAB, member of RAS oncogene family like 3	0.643	4.416
8131957	SNX10	sorting nexin 10	0.643	3.535
8006325	SUZ12	SUZ12 polycomb repressive complex 2 subunit	0.643	5.221
7974125	FAM179B	family with sequence similarity 179 member B	0.642	4.63
7989516	HERC1	HECT and RLD domain containing E3 ubiquitin protein ligase family member 1	0.642	2.62
8163795	PSMD5	proteasome 26S subunit, non-ATPase 5	0.642	2.896
8157700	RABGAP1	RAB GTPase activating protein 1	0.642	3.146
7897890	VPS13D	vacuolar protein sorting 13 homolog D	0.642	2.528
7934812	WAPL	WAPL cohesin release factor	0.642	4.903
7968883	LACC1	laccase domain containing 1	0.641	5.229
8083968	NLGN1	neuroligin 1	0.641	3.777
7956949	NUP107	nucleoporin 107	0.641	6.342
8045289	RHOQ	ras homolog family member Q	0.641	6.072
8064879	TRMT6	tRNA methyltransferase 6	0.641	3.828
7957613	VEZT	vezatin, adherens junctions transmembrane protein	0.641	3.051
8034379	ZNF442	zinc finger protein 442	0.641	3.754
8053288	GCFC2	GC-rich sequence DNA-binding factor 2	0.64	5.002
8151842	KIAA1429	KIAA1429	0.64	3.217
7914235	SRSF4	serine and arginine rich splicing factor 4	0.64	5.204
8133049	ZNF107	zinc finger protein 107	0.64	5.692
7968484	BRCA2	BRCA2, DNA repair associated	0.639	5.619
8160531	C9orf72	chromosome 9 open reading frame 72	0.639	2.829
8061986	ITCH	itchy E3 ubiquitin protein ligase	0.639	6.675
7973414	NGDN	neuroguidin	0.639	2.597
7948379	OSBP	oxysterol binding protein	0.639	3.69
8094556	PGM2	phosphoglucomutase 2	0.639	4.388
8173892	CHM	CHM, Rab escort protein 1	0.638	3.839
7967933	IFT88	intraflagellar transport 88	0.638	5.218
8050367	NBAS	neuroblastoma amplified sequence	0.638	2.837
7968132	NUP58	nucleoporin 58	0.638	3.039
7918275	WDR47	WD repeat domain 47	0.638	4.297
8124459	ZNF322	zinc finger protein 322	0.638	2.922
8155849	ANXA1	annexin A1	0.637	4.212
8000167	BOLA2-SMG1P6///LOC101060386///SMG1P3///SMG1P1///SMG1P5///BOLA2///SMG1P2///SLC7A5P2///SMG1	BOLA2-SMG1P6 readthrough///putative uncharacterized SMG1-like protein///SMG1P3, nonsense mediated mRNA decay associated PI3K related kinase pseudogene 3///SMG1P1, nonsense mediated mRNA decay associated PI3K related kinase pseudogene 1///SMG1P5, nonsense mediated mRNA decay associated PI3K related kinase pseudogene 5///bolA family member 2///SMG1P2, nonsense mediated mRNA decay associated PI3K re…	0.637	3.671
8130422	CNKSR3///CNKSR3	CNKSR family member 3///CNKSR family member 3	0.637	1.896
8153959	DOCK8	dedicator of cytokinesis 8	0.637	1.986
7927233	FAM21A///FAM21C	family with sequence similarity 21 member A///family with sequence similarity 21 member C	0.637	2.875
8104506	TRIO	trio Rho guanine nucleotide exchange factor	0.637	2.76
8109712	HMMR	hyaluronan mediated motility receptor	0.636	4.186
8051670	SOS1	SOS Ras/Rac guanine nucleotide exchange factor 1	0.636	3.421
7973902	SRP54	signal recognition particle 54	0.636	5.431
8017885	ABCA8	ATP binding cassette subfamily A member 8	0.635	2.104
8160559	DDX58	DEXD/H-box helicase 58	0.635	1.748
8180311	DYNC1I2	dynein cytoplasmic 1 intermediate chain 2	0.635	2.994
8089372	KIAA1524	KIAA1524	0.635	5.093
8113709	LOX	lysyl oxidase	0.635	2.422
7971373	TPT1	tumor protein, translationally-controlled 1	0.635	2.834
7925550	ADSS	adenylosuccinate synthase	0.634	6.23
8136341	BPGM	bisphosphoglycerate mutase	0.634	2.819
7963187	LIMA1	LIM domain and actin binding 1	0.634	2.845
8114158	PPP2CA	protein phosphatase 2 catalytic subunit alpha	0.634	4.504
7926851	WAC	WW domain containing adaptor with coiled-coil	0.634	5.032
7927169	ZNF487	zinc finger protein 487	0.634	3.13
7954969	IRAK4	interleukin 1 receptor associated kinase 4	0.633	3.573
8041383	LTBP1	latent transforming growth factor beta binding protein 1	0.633	2.488
7902822	PKN2	protein kinase N2	0.633	4.471
8129108	ZUFSP	zinc finger with UFM1 specific peptidase domain	0.633	4.934
8103341	MAP9	microtubule associated protein 9	0.632	5.236
8160332	MLLT3	MLLT3, super elongation complex subunit	0.632	3.541
8060854	PLCB1	phospholipase C beta 1	0.632	2.948
7917359	ZNHIT6	zinc finger HIT-type containing 6	0.632	3.079
7965812	GNPTAB	N-acetylglucosamine-1-phosphate transferase alpha and beta subunits	0.631	3.679
8135363	PIK3CG	phosphatidylinositol-4,5-bisphosphate 3-kinase catalytic subunit gamma	0.631	3.274
7927814	SIRT1	sirtuin 1	0.631	4.826
8141107	SLC25A13	solute carrier family 25 member 13	0.631	4.026
8089647	USF3	upstream transcription factor family member 3	0.631	4.264
8167601	USP27X	ubiquitin specific peptidase 27, X-linked	0.631	2.811
8031748	ZNF749	zinc finger protein 749	0.631	2.425
8115181	DCTN4	dynactin subunit 4	0.63	3.734
8171921	DMD	dystrophin	0.63	4.811
8104901	IL7R	interleukin 7 receptor	0.63	2.434
8007850	LRRC37A2///LRRC37A6P///LRRC37A3///LRRC37A4P///LRRC37A///LRRC37A2	leucine rich repeat containing 37 member A2///leucine rich repeat containing 37 member A6, pseudogene///leucine rich repeat containing 37 member A3///leucine rich repeat containing 37 member A4, pseudogene///leucine rich repeat containing 37A///leucine rich repeat containing 37 member A2	0.63	2.601
8060997	SPTLC3	serine palmitoyltransferase long chain base subunit 3	0.63	1.878
8083901	FNDC3B	fibronectin type III domain containing 3B	0.629	3.841
8157233	HSDL2	hydroxysteroid dehydrogenase like 2	0.629	3.048
8047174	SLC39A10	solute carrier family 39 member 10	0.629	3.941
8054217	TXNDC9	thioredoxin domain containing 9	0.629	4.608
8145454	BNIP3L	BCL2 interacting protein 3 like	0.628	5.089
7942914	EED	embryonic ectoderm development	0.628	5.824
8103206	FBXW7	F-box and WD repeat domain containing 7	0.628	3.66
8056734	TLK1	tousled like kinase 1	0.627	5.904
7975066	AKAP5	A-kinase anchoring protein 5	0.626	3.31
7926531	ARL5B	ADP ribosylation factor like GTPase 5B	0.626	3.174
7950764	DLG2	discs large MAGUK scaffold protein 2	0.626	3.757
8133176	RABGEF1	RAB guanine nucleotide exchange factor 1	0.626	3.123
8146717	C8orf44-SGK3///SGK3	C8orf44-SGK3 readthrough///serum/glucocorticoid regulated kinase family member 3	0.625	4.414
8113010	CCNH	cyclin H	0.625	2.798
7980496	CEP128	centrosomal protein 128	0.625	5.442
7938592	FAR1	fatty acyl-CoA reductase 1	0.625	4.343
8175683	MIR224///GABRE	microRNA 224///gamma-aminobutyric acid type A receptor epsilon subunit	0.625	2.507
8086706	SETD2	SET domain containing 2	0.625	5.389
7979281	WDHD1	WD repeat and HMG-box DNA binding protein 1	0.625	3.54
7988644	ATP8B4	ATPase phospholipid transporting 8B4 (putative)	0.624	3.157
8135544	FOXP2	forkhead box P2	0.624	3.857
8101043	G3BP2	G3BP stress granule assembly factor 2	0.624	3.755
7921076	GPATCH4	G-patch domain containing 4	0.624	3.569
7910550	TSNAX-DISC1///TSNAX	TSNAX-DISC1 readthrough (NMD candidate)///translin associated factor X	0.624	4.669
7979204	FERMT2	fermitin family member 2	0.623	3.564
8116297	HNRNPH1	heterogeneous nuclear ribonucleoprotein H1 (H)	0.623	4.755
8068266	IFNAR1	interferon alpha and beta receptor subunit 1	0.623	3.47
7907611	RASAL2	RAS protein activator like 2	0.623	2.634
8013262	USP32P2///USP32P1///USP32///USP6	ubiquitin specific peptidase 32 pseudogene 2///ubiquitin specific peptidase 32 pseudogene 1///ubiquitin specific peptidase 32///ubiquitin specific peptidase 6	0.623	2.282
8162639	ZNF782	zinc finger protein 782	0.623	5.208
8022711	DSC2	desmocollin 2	0.622	3.848
8081853	POGLUT1	protein O-glucosyltransferase 1	0.622	3.361
8142618	RNF133	ring finger protein 133	0.622	2.598
8150287	WHSC1L1	Wolf-Hirschhorn syndrome candidate 1-like 1	0.622	3.841
8035803	ZNF708	zinc finger protein 708	0.622	5.629
7943620	ATM	ATM serine/threonine kinase	0.621	2.754
8127563	COL12A1	collagen type XII alpha 1 chain	0.621	2.435
7928909	FAM35A	family with sequence similarity 35 member A	0.621	4.682
7957298	NAV3	neuron navigator 3	0.621	3.542
8116622	RIPK1	receptor interacting serine/threonine kinase 1	0.621	2.496
8173825	RPS6KA6	ribosomal protein S6 kinase A6	0.621	4.438
8034393	ZNF443	zinc finger protein 443	0.621	2.226
8081503	DZIP3	DAZ interacting zinc finger protein 3	0.62	3.575
8097128	EXOSC9	exosome component 9	0.62	3.782
8098041	TMEM144	transmembrane protein 144	0.62	4.396
8011245	TSR1	TSR1, ribosome maturation factor	0.62	2.93
8033780	ZNF426	zinc finger protein 426	0.62	3.944
8045563	ARHGAP15	Rho GTPase activating protein 15	0.619	3.733
8093112	UBXN7	UBX domain protein 7	0.619	4.589
8140864	CYP51A1	cytochrome P450 family 51 subfamily A member 1	0.618	3.39
8156164	LOC389765///KIF27	kinesin family member 27 pseudogene///kinesin family member 27	0.618	4.274
7988245	MFAP1	microfibrillar associated protein 1	0.618	3.935
8167006	RP2	retinitis pigmentosa 2 (X-linked recessive)	0.618	3.96
7902771	SH3GLB1	SH3 domain containing GRB2 like endophilin B1	0.618	4.907
8016088	CCDC43	coiled-coil domain containing 43	0.617	3.66
7921637	CD84	CD84 molecule	0.617	2.772
8084219	KLHL24	kelch like family member 24	0.617	2.633
7962760	SENP1	SUMO1/sentrin specific peptidase 1	0.617	5.483
7939368	TRIM44	tripartite motif containing 44	0.617	4.35
8030946	ZNF808	zinc finger protein 808	0.617	4.245
8060225	HDLBP	high density lipoprotein binding protein	0.616	3.09
8050565	PUM2	pumilio RNA binding family member 2	0.616	2.671
8140686	SEMA3D	semaphorin 3D	0.616	1.773
8069574	C21orf91	chromosome 21 open reading frame 91	0.615	3.133
8023727	DSEL	dermatan sulfate epimerase-like	0.615	3.071
7969677	MBNL2	muscleblind like splicing regulator 2	0.615	3.716
8098705	MTRF1L	mitochondrial translational release factor 1 like	0.615	4.461
8067305	SYCP2	synaptonemal complex protein 2	0.615	4.306
8144516	ERI1	exoribonuclease 1	0.614	3.386
7932000	KIN	Kin17 DNA and RNA binding protein	0.614	5.083
8012961	NCOR1	nuclear receptor corepressor 1	0.614	3.242
7974380	PSMC6	proteasome 26S subunit, ATPase 6	0.614	4.828
7903703	GNAI3	G protein subunit alpha i3	0.613	4.149
7978718	SEC23A	Sec23 homolog A, coat complex II component	0.613	4
8099834	TLR1	toll like receptor 1	0.613	3.325
8015715	BECN1	beclin 1	0.612	3.381
8123920	ELOVL2	ELOVL fatty acid elongase 2	0.612	2.721
8006345	RHOT1	ras homolog family member T1	0.612	3.858
8124273	C6orf62	chromosome 6 open reading frame 62	0.611	5.028
8065256	CRNKL1	crooked neck pre-mRNA splicing factor 1	0.611	3.843
8004694	CYB5D1	cytochrome b5 domain containing 1	0.611	1.999
7936408	DCLRE1A	DNA cross-link repair 1A	0.611	3.951
7991722	LOC102724093///GOLGA6L3///GOLGA6L10///GOLGA6L4///GOLGA6L17P///GOLGA6L9///GOLGA6L5P	golgin subfamily A member 6-like protein 4///golgin A6 family-like 3///golgin A6 family-like 10///golgin A6 family-like 4///golgin A6 family-like 17, pseudogene///golgin A6 family-like 9///golgin A6 family-like 5, pseudogene	0.611	3.637
8169603	LONRF3	LON peptidase N-terminal domain and ring finger 3	0.611	2.518
8088535	PSMD6	proteasome 26S subunit, non-ATPase 6	0.611	3.282
8089026	STX19	syntaxin 19	0.611	5.717
7962831	CCNT1	cyclin T1	0.61	3.473
8009205	DDX42	DEAD-box helicase 42	0.61	3.578
7912157	ERRFI1	ERBB receptor feedback inhibitor 1	0.61	2.928
8180356	RPL7L1	ribosomal protein L7 like 1	0.61	3.291
7924686	SDE2	SDE2 telomere maintenance homolog	0.61	2.872
8157216	UGCG	UDP-glucose ceramide glucosyltransferase	0.61	2.011
7952305	BMPR1A	bone morphogenetic protein receptor type 1A	0.609	3.059
8118345	CFB	complement factor B	0.609	2.819
7947969	FNBP4	formin binding protein 4	0.609	3.661
7989013	RSL24D1	ribosomal L24 domain containing 1	0.609	3.837
8103975	SLED1	proteoglycan 3 pseudogene	0.609	2.535
8092800	ATP13A4	ATPase 13A4	0.608	2.153
8042223	EHBP1	EH domain binding protein 1	0.608	3.122
8123274	MAP3K4	mitogen-activated protein kinase kinase kinase 4	0.608	2.802
7954589	REP15	RAB15 effector protein	0.608	3.492
8114193	SAR1B	secretion associated Ras related GTPase 1B	0.608	3.223
8152255	SLC25A32	solute carrier family 25 member 32	0.608	4.009
7971159	TNAP	TRAFs and NIK-associated protein	0.608	2.853
7904018	CTTNBP2NL	CTTNBP2 N-terminal like	0.607	3.309
8092933	ACAP2	ArfGAP with coiled-coil, ankyrin repeat and PH domains 2	0.606	4.339
8152297	ANGPT1	angiopoietin 1	0.606	2.35
8154333	KDM4C	lysine demethylase 4C	0.606	3.316
7918467	LRIF1	ligand dependent nuclear receptor interacting factor 1	0.606	2.949
8058428	NDUFS1	NADH:ubiquinone oxidoreductase core subunit S1	0.606	3.572
7935320	TM9SF3	transmembrane 9 superfamily member 3	0.606	6.351
7938035	TRIM22	tripartite motif containing 22	0.606	2.174
8169969	PHF6	PHD finger protein 6	0.604	2.902
8127498	MIR30C2	microRNA 30c-2	0.603	2.256
8175076	ZNF280C	zinc finger protein 280C	0.603	3.195
8021113	C18orf25	chromosome 18 open reading frame 25	0.602	3.178
8041487	GPATCH11	G-patch domain containing 11	0.602	4.877
8040552	NCOA1	nuclear receptor coactivator 1	0.602	3.544
8098512	TRAPPC11	trafficking protein particle complex 11	0.602	2.545
8005501	TVP23C-CDRT4///TVP23C///TVP23B	TVP23C-CDRT4 readthrough///trans-golgi network vesicle protein 23 homolog C (S. cerevisiae)///trans-golgi network vesicle protein 23 homolog B (S. cerevisiae)	0.602	5.152
8066745	ZNF334	zinc finger protein 334	0.602	3.299
8040142	CPSF3	cleavage and polyadenylation specific factor 3	0.601	4.14
8147516	MATN2	matrilin 2	0.601	2.274
8156718	NCBP1	nuclear cap binding protein subunit 1	0.601	4.072
8105663	NLN	neurolysin	0.601	3.442
7972297	ABCC4	ATP binding cassette subfamily C member 4	0.6	2.191
8044391	MERTK	MER proto-oncogene, tyrosine kinase	0.6	2.149
7915787	PIK3R3	phosphoinositide-3-kinase regulatory subunit 3	0.6	1.998
8141052	PON1	paraoxonase 1	0.6	4.292
8075542	PRR14L	proline rich 14 like	0.6	4.206
8123767	SSR1	signal sequence receptor subunit 1	0.6	4.343
8117321	TRIM38	tripartite motif containing 38	0.6	2.207
8154733	ACO1	aconitase 1	0.599	2.644
8058203	ALS2CR12	amyotrophic lateral sclerosis 2 chromosome region candidate 12	0.599	2.32
8121461	CDC40	cell division cycle 40	0.599	3.73
8047217	COQ10B	coenzyme Q10B	0.599	3.93
8146756	CSPP1	centrosome and spindle pole associated protein 1	0.599	3.936
7931239	EDRF1	erythroid differentiation regulatory factor 1	0.599	3.146
7913571	HNRNPR	heterogeneous nuclear ribonucleoprotein R	0.599	4.804
8156167	NAA35	N(alpha)-acetyltransferase 35, NatC auxiliary subunit	0.599	3.98
7900201	UTP11	UTP11, small subunit processome component homolog (S. cerevisiae)	0.599	4.495
8082673	ACPP	acid phosphatase, prostate	0.598	2.674
7965652	CDK17	cyclin dependent kinase 17	0.598	4.971
8106626	FAM151B	family with sequence similarity 151 member B	0.598	6.023
8022356	SPIRE1	spire type actin nucleation factor 1	0.598	3.219
8171041	VAMP7	vesicle associated membrane protein 7	0.598	7.15
8148333	EFR3A	EFR3 homolog A	0.597	2.943
7946610	EIF4G2	eukaryotic translation initiation factor 4 gamma 2	0.597	3.56
7909992	FBXO28	F-box protein 28	0.597	5.163
8045816	GPD2	glycerol-3-phosphate dehydrogenase 2	0.597	2.429
8169868	UTP14A	UTP14A small subunit processome component	0.597	3.354
8030954	ZNF137P	zinc finger protein 137, pseudogene	0.597	3.496
8029280	CD177	CD177 molecule	0.596	1.901
7974697	DAAM1	dishevelled associated activator of morphogenesis 1	0.596	2.293
8000184	IGSF6	immunoglobulin superfamily member 6	0.596	2.227
7993999	LOC101060386///SMG1P3///SMG1P1///SMG1P5///SMG1P2///SMG1	putative uncharacterized SMG1-like protein///SMG1P3, nonsense mediated mRNA decay associated PI3K related kinase pseudogene 3///SMG1P1, nonsense mediated mRNA decay associated PI3K related kinase pseudogene 1///SMG1P5, nonsense mediated mRNA decay associated PI3K related kinase pseudogene 5///SMG1P2, nonsense mediated mRNA decay associated PI3K related kinase pseudogene 2///SMG1, nonsense mediate…	0.596	3.374
8168303	TAF1	TATA-box binding protein associated factor 1	0.596	3.663
8022767	TRAPPC8	trafficking protein particle complex 8	0.596	3.618
8093332	ZNF876P	zinc finger protein 876, pseudogene	0.596	5.822
7939242	CAPRIN1	cell cycle associated protein 1	0.595	3.635
7997381	CENPN	centromere protein N	0.595	3.61
8081758	GRAMD1C	GRAM domain containing 1C	0.595	4.775
8079237	KIF15	kinesin family member 15	0.595	3.69
8151254	NCOA2	nuclear receptor coactivator 2	0.595	3.306
8051396	NLRC4	NLR family CARD domain containing 4	0.595	2.15
8022251	PPP4R1	protein phosphatase 4 regulatory subunit 1	0.595	2.955
8087374	C3orf62	chromosome 3 open reading frame 62	0.594	2.533
8057554	CACYBP	calcyclin binding protein	0.594	3.092
8083429	MBNL1	muscleblind like splicing regulator 1	0.594	3.986
8022531	NPC1	NPC intracellular cholesterol transporter 1	0.594	2.265
8111796	PRKAA1	protein kinase AMP-activated catalytic subunit alpha 1	0.594	5.214
7956826	TBC1D30	TBC1 domain family member 30	0.594	3.66
8100603	CENPC	centromere protein C	0.593	3.394
8154178	JAK2	Janus kinase 2	0.593	2.796
8121144	MANEA	mannosidase endo-alpha	0.593	3.616
8096556	METAP1	methionyl aminopeptidase 1	0.593	3.555
7913712	SRSF10	serine and arginine rich splicing factor 10	0.593	4.139
8049827	2023-09-02	septin 2	0.592	2.933
8147172	CPNE3	copine 3	0.592	3.013
7919815	CTSK	cathepsin K	0.592	2.341
8067955	CXADR	coxsackie virus and adenovirus receptor	0.592	4.373
8107673	GRAMD3	GRAM domain containing 3	0.592	2.879
7936064	NT5C2///NT5C2	5'-nucleotidase, cytosolic II///5'-nucleotidase, cytosolic II	0.592	3.083
8116848	PAK1IP1	PAK1 interacting protein 1	0.592	2.226
8090256	SNX4	sorting nexin 4	0.592	6.071
8162294	SPTLC1	serine palmitoyltransferase long chain base subunit 1	0.592	2.876
8093320	ZNF718///ZNF595	zinc finger protein 718///zinc finger protein 595	0.592	4.087
8095187	CEP135	centrosomal protein 135	0.591	5.385
8129045	HDAC2	histone deacetylase 2	0.591	5.337
8171837	KLHL15	kelch like family member 15	0.591	2.901
8021208	ME2	malic enzyme 2	0.591	4.196
8160040	PTPRD	protein tyrosine phosphatase, receptor type D	0.591	2.861
8147661	SPAG1	sperm associated antigen 1	0.591	3.753
8094190	CC2D2A	coiled-coil and C2 domain containing 2A	0.59	3.444
8022674	CDH2	cadherin 2	0.59	1.751
7960594	CHD4	chromodomain helicase DNA binding protein 4	0.59	2.474
7902930	HSP90B3P	heat shock protein 90 beta family member 3, pseudogene	0.59	4.208
8055426	MCM6	minichromosome maintenance complex component 6	0.59	4.091
8062213	PHF20	PHD finger protein 20	0.59	3.271
7932796	SVIL	supervillin	0.59	2.498
7944285	ARCN1	archain 1	0.589	3.604
7952325	HSPA8	heat shock protein family A (Hsp70) member 8	0.589	2.427
7978917	LINC01599	long intergenic non-protein coding RNA 1599	0.589	2.463
7957478	TMTC3	transmembrane and tetratricopeptide repeat containing 3	0.589	4
7932433	NSUN6	NOP2/Sun RNA methyltransferase family member 6	0.588	3.468
8113591	PGGT1B	protein geranylgeranyltransferase type I subunit beta	0.588	4.59
8159876	RFX3	regulatory factor X3	0.588	3.264
8161346	ZNF658B///ZNF658	zinc finger protein 658B (pseudogene)///zinc finger protein 658	0.588	3.397
8055377	ZRANB3	zinc finger RANBP2-type containing 3	0.588	3.598
8106448	PDE8B	phosphodiesterase 8B	0.587	1.918
8101934	DNAJB14	DnaJ heat shock protein family (Hsp40) member B14	0.586	4.805
8078360	STT3B	STT3B, catalytic subunit of the oligosaccharyltransferase complex	0.586	3.973
8140478	GSAP	gamma-secretase activating protein	0.585	2.427
8140878	KRIT1	KRIT1, ankyrin repeat containing	0.585	3.841
8101587	MAPK10	mitogen-activated protein kinase 10	0.585	3.657
7938348	WEE1	WEE1 G2 checkpoint kinase	0.585	2.211
8035249	NR2F6	nuclear receptor subfamily 2 group F member 6	-0.585	3.493
8158523	PTPA	protein phosphatase 2 phosphatase activator	-0.585	3.489
8071920	SNRPD3	small nuclear ribonucleoprotein D3 polypeptide	-0.585	2.038
8140196	STAG3L5P-PVRIG2P-PILRB///STAG3L2///STAG3L3///STAG3L1///STAG3	STAG3L5P-PVRIG2P-PILRB readthrough///stromal antigen 3-like 2 (pseudogene)///stromal antigen 3-like 3 (pseudogene)///stromal antigen 3-like 1 (pseudogene)///stromal antigen 3	-0.585	5.515
7992639	TBC1D24	TBC1 domain family member 24	-0.585	4.899
7951781	C11orf71	chromosome 11 open reading frame 71	-0.586	4.304
8160441	CDKN2A	cyclin dependent kinase inhibitor 2A	-0.586	3.766
7926896	CKS1B	CDC28 protein kinase regulatory subunit 1B	-0.586	4.861
7998251	METTL26	methyltransferase like 26	-0.586	4.268
7941136	VPS51	VPS51, GARP complex subunit	-0.586	3.717
8145865	ADGRA2	adhesion G protein-coupled receptor A2	-0.587	3.441
8126446	C6orf226	chromosome 6 open reading frame 226	-0.587	3.033
8131143	LFNG	LFNG O-fucosylpeptide 3-beta-N-acetylglucosaminyltransferase	-0.587	3.078
8163930	NDUFA8	NADH:ubiquinone oxidoreductase subunit A8	-0.587	4.271
8125687	RGL2	ral guanine nucleotide dissociation stimulator like 2	-0.587	4.409
7911591	SLC35E2B	solute carrier family 35 member E2B	-0.587	4.223
8011724	VMO1	vitelline membrane outer layer 1 homolog	-0.587	3.258
7925904	AKR1E2	aldo-keto reductase family 1 member E2	-0.588	3.73
8009755	ARMC7	armadillo repeat containing 7	-0.588	3.784
8098762	ATP5I	ATP synthase, H+ transporting, mitochondrial Fo complex subunit E	-0.588	3.724
7919625	HIST2H2BD///HIST2H2BC///HIST2H2BE	histone cluster 2, H2bd (pseudogene)///histone cluster 2, H2bc (pseudogene)///histone cluster 2, H2be	-0.588	3.966
8032455	PLEKHJ1	pleckstrin homology domain containing J1	-0.588	4.218
8032392	MKNK2	MAP kinase interacting serine/threonine kinase 2	-0.589	3.451
7919326	ACP6	acid phosphatase 6, lysophosphatidic	-0.59	5.22
8117608	HIST1H2AL///HIST1H2AL	histone cluster 1, H2al///histone cluster 1, H2al	-0.59	3.304
8060339	NRSN2	neurensin 2	-0.59	2.598
7923662	PIK3C2B	phosphatidylinositol-4-phosphate 3-kinase catalytic subunit type 2 beta	-0.59	2.506
8037505	TRAPPC6A	trafficking protein particle complex 6A	-0.59	4.63
8164653	UCK1	uridine-cytidine kinase 1	-0.59	5.045
8134117	FZD1	frizzled class receptor 1	-0.591	4.696
7949765	PPP1CA	protein phosphatase 1 catalytic subunit alpha	-0.591	4.517
7984257	RNU5A-1	RNA, U5A small nuclear 1	-0.591	3.108
8028930	RAB4B-EGLN2///MIA-RAB4B///RAB4B	RAB4B-EGLN2 readthrough (NMD candidate)///MIA-RAB4B readthrough (NMD candidate)///RAB4B, member RAS oncogene family	-0.592	3.827
7992402	NDUFB10	NADH:ubiquinone oxidoreductase subunit B10	-0.593	5.101
8117583	HIST1H3H///HIST1H2AI	histone cluster 1, H3h///histone cluster 1, H2ai	-0.594	2.715
7898585	MINOS1-NBL1///NBL1	MINOS1-NBL1 readthrough///neuroblastoma 1, DAN family BMP antagonist	-0.594	3.943
7949540	C11orf68	chromosome 11 open reading frame 68	-0.595	3.41
8018264	HID1	HID1 domain containing	-0.595	3.114
8006415	TMEM98	transmembrane protein 98	-0.595	4.446
7911720	PEX10	peroxisomal biogenesis factor 10	-0.596	3.432
8019802	RNU2-1	RNA, U2 small nuclear 1	-0.596	6.399
7981947	SNORD109B///SNORD109A	small nucleolar RNA, C/D box 109B///small nucleolar RNA, C/D box 109A	-0.596	2.658
8052925	TEX261	testis expressed 261	-0.596	3.836
7959070	PEBP1	phosphatidylethanolamine binding protein 1	-0.597	2.824
8139977	STAG3L5P-PVRIG2P-PILRB///STAG3L2///STAG3L3///STAG3L1	STAG3L5P-PVRIG2P-PILRB readthrough///stromal antigen 3-like 2 (pseudogene)///stromal antigen 3-like 3 (pseudogene)///stromal antigen 3-like 1 (pseudogene)	-0.597	5.325
7933209	C10orf25	chromosome 10 open reading frame 25	-0.598	4.324
7912239	GPR157	G protein-coupled receptor 157	-0.598	3.745
8045009	GYPC	glycophorin C (Gerbich blood group)	-0.598	3.504
8010086	METTL23	methyltransferase like 23	-0.598	3.966
8012212	ZBTB4	zinc finger and BTB domain containing 4	-0.598	3.81
8178090	C6orf48///SVIL	chromosome 6 open reading frame 48///supervillin	-0.599	3.588
8117589	HIST1H3H	histone cluster 1, H3h	-0.599	2.559
8138224	NDUFA4	NDUFA4, mitochondrial complex associated	-0.599	2.956
8062864	WISP2	WNT1 inducible signaling pathway protein 2	-0.599	2.477
8164293	AK1	adenylate kinase 1	-0.6	2.867
8026698	BABAM1///BABAM1	BRISC and BRCA1 A complex member 1///BRISC and BRCA1 A complex member 1	-0.6	4.41
8111930	LOC100132356	uncharacterized LOC100132356	-0.6	2.307
7941732	RCE1	Ras converting CAAX endopeptidase 1	-0.6	4.368
8063074	ZSWIM1	zinc finger SWIM-type containing 1	-0.6	4.271
8093166	PIGZ	phosphatidylinositol glycan anchor biosynthesis class Z	-0.601	3.012
8061227	SLC24A3	solute carrier family 24 member 3	-0.601	2.505
8114593	APBB3	amyloid beta precursor protein binding family B member 3	-0.602	3.514
8158214	COQ4///COQ4	coenzyme Q4///coenzyme Q4	-0.602	5.018
7973352	LRP10	LDL receptor related protein 10	-0.602	3.891
8017460	PTCRA///SMARCD2	pre T-cell antigen receptor alpha///SWI/SNF related, matrix associated, actin dependent regulator of chromatin, subfamily d, member 2	-0.602	4.906
7945944	RHOG	ras homolog family member G	-0.602	3.882
7948741	B3GAT3	beta-1,3-glucuronyltransferase 3	-0.603	3.764
8125537	HLA-DMA	major histocompatibility complex, class II, DM alpha	-0.603	4.134
8078008	LSM3	LSM3 homolog, U6 small nuclear RNA and mRNA degradation associated	-0.603	2.9
8031933	RPS5	ribosomal protein S5	-0.603	5.079
8040365	TRIB2	tribbles pseudokinase 2	-0.603	4.078
7953166	TSPAN9	tetraspanin 9	-0.603	3.398
7905691	ZNF320///RPS27///RGS4///RPS27	zinc finger protein 320///ribosomal protein S27///regulator of G-protein signaling 4///ribosomal protein S27	-0.603	4.533
8125752	CUTA	cutA divalent cation tolerance homolog	-0.604	4.448
7963614	ITGB7	integrin subunit beta 7	-0.604	3.97
7931977	ITIH5	inter-alpha-trypsin inhibitor heavy chain family member 5	-0.604	3.742
8001547	PLLP	plasmolipin	-0.604	2.659
8177851	C6orf136	chromosome 6 open reading frame 136	-0.605	3.688
8063497	CASS4	Cas scaffolding protein family member 4	-0.605	1.911
8125463	HLA-DQB2///HLA-DQB1	major histocompatibility complex, class II, DQ beta 2///major histocompatibility complex, class II, DQ beta 1	-0.605	2.419
7926677	OTUD1	OTU deubiquitinase 1	-0.605	2.339
7968004	SGCG	sarcoglycan gamma	-0.605	2.286
7944275	TMEM25	transmembrane protein 25	-0.605	3.313
8039791	ZBTB45	zinc finger and BTB domain containing 45	-0.605	4.684
8029489	BCAM	basal cell adhesion molecule (Lutheran blood group)	-0.606	2.857
8124413	HIST1H4D	histone cluster 1, H4d	-0.606	1.858
7996563	HSD11B2	hydroxysteroid 11-beta dehydrogenase 2	-0.606	3.064
[truncated: 733 more rows]
