# Supplementary material for: Transcriptome-Wide N6-Methyladenosine Alternations in Pulmonary Arteries of Monocrotaline-Induced Pulmonary Arterial Hypertension in Rats and Novel Therapeutic Targets
Source: Biomedicines. 2024 Feb 4;12(2):364. doi: 10.3390/biomedicines12020364 (PMC10886831; doi:10.3390/biomedicines12020364)
Supplement: Supplementary file 1 [file biomedicines-12-00364-s001.zip › Supplemental Table S5.xlsx]

## Sheet: Sheet1
ID	Gene.symbol	Gene.title	log2(fold change)	#NAME?
230332_at	ZCCHC7	zinc finger CCHC-type containing 7	4.832	9.462
214777_at	IGKC	immunoglobulin kappa constant	4.701	3.555
214218_s_at	XIST	X inactive specific transcript (non-protein coding)	4.531	2.738
236293_at	RHOH	ras homolog family member H	4.409	8.914
213906_at	MYBL1	MYB proto-oncogene like 1	4.181	6.002
238593_at	C11orf80	chromosome 11 open reading frame 80	4.08	7.02
220940_at	ANKRD36B	ankyrin repeat domain 36B	3.769	7.497
230505_at	LOC145474	uncharacterized LOC145474	3.732	9.149
230292_at	LOC100996412	uncharacterized LOC100996412	3.731	6.451
239757_at	ZFAND6	zinc finger AN1-type containing 6	3.721	7.133
242918_at	NASP	nuclear autoantigenic sperm protein	3.698	8.928
235730_at	NUTM2B-AS1	NUTM2B antisense RNA 1	3.69	8.784
1558569_at	LOC100131541	uncharacterized LOC100131541	3.668	8.876
230086_at	FNBP1	formin binding protein 1	3.636	6.885
233813_at	PPP1R16B	protein phosphatase 1 regulatory subunit 16B	3.633	7.966
219957_at	RUFY2	RUN and FYVE domain containing 2	3.632	8.12
1556183_at	ANKRD36BP2	ankyrin repeat domain 36B pseudogene 2	3.617	4.001
233261_at	EBF1	early B-cell factor 1	3.615	7.444
228455_at	RBM15	RNA binding motif protein 15	3.597	10.15
1561079_at	ANKRD28	ankyrin repeat domain 28	3.593	9.366
1570507_at	SCAF11	SR-related CTD associated factor 11	3.591	9.173
216984_x_at	IGLJ3///IGLV1-44///CKAP2///IGLV@///IGLC1	immunoglobulin lambda joining 3///immunoglobulin lambda variable 1-44///cytoskeleton associated protein 2///immunoglobulin lambda variable cluster///immunoglobulin lambda constant 1	3.554	3
1561884_at	CEPT1	choline/ethanolamine phosphotransferase 1	3.504	7.86
203408_s_at	SATB1	SATB homeobox 1	3.492	6.155
240383_at	UBE2D3	ubiquitin conjugating enzyme E2 D3	3.475	8.234
1560706_at	NEDD9	neural precursor cell expressed, developmentally down-regulated 9	3.471	9.414
216560_x_at	IGLC1	immunoglobulin lambda constant 1	3.433	2.631
1556820_a_at	DLEU2	deleted in lymphocytic leukemia 2 (non-protein coding)	3.412	8.941
1552343_s_at	PDE7A	phosphodiesterase 7A	3.385	8.617
239243_at	ZNF638-IT1///ZNF638	ZNF638 intronic transcript 1///zinc finger protein 638	3.366	7.987
1553349_at	ARID2	AT-rich interaction domain 2	3.352	7.331
1557071_s_at	NUB1	negative regulator of ubiquitin like proteins 1	3.348	6.345
207746_at	POLQ	DNA polymerase theta	3.33	6.687
214059_at	IFI44	interferon induced protein 44	3.329	4.361
230462_at	NUMB	NUMB, endocytic adaptor protein	3.3	6.911
211643_x_at	IGK///IGKC	immunoglobulin kappa locus///immunoglobulin kappa constant	3.285	3.158
235060_at	LOC100190986	uncharacterized LOC100190986	3.28	7.299
227383_at	LOC727820	uncharacterized LOC727820	3.268	8.015
1553185_at	RASEF	RAS and EF-hand domain containing	3.252	8.725
1570571_at	CCDC91	coiled-coil domain containing 91	3.246	8.649
223746_at	STK4	serine/threonine kinase 4	3.236	8.218
226587_at	PWAR6	Prader Willi/Angelman region RNA 6	3.231	9.215
226444_at	LOC107985971	uncharacterized LOC107985971	3.221	8.512
211868_x_at	IGHV4-31///IGHM///IGHG3///IGHG2///IGHG1///IGHD///IGHA2///IGHA1///IGH	immunoglobulin heavy variable 4-31///immunoglobulin heavy constant mu///immunoglobulin heavy constant gamma 3 (G3m marker)///immunoglobulin heavy constant gamma 2 (G2m marker)///immunoglobulin heavy constant gamma 1 (G1m marker)///immunoglobulin heavy constant delta///immunoglobulin heavy constant alpha 2 (A2m marker)///immunoglobulin heavy constant alpha 1///immunoglobulin heavy locus	3.217	3.254
1569652_at	MLLT3	MLLT3, super elongation complex subunit	3.204	7.213
1559038_at	2023-09-02	septin 2	3.203	6.122
230097_at	GART	phosphoribosylglycinamide formyltransferase, phosphoribosylglycinamide synthetase, phosphoribosylaminoimidazole synthetase	3.193	8.515
1557239_at	BBX	BBX, HMG-box containing	3.179	7.589
210109_at	SND1-IT1	SND1 intronic transcript 1	3.179	6.635
209936_at	RBM5	RNA binding motif protein 5	3.173	7.419
228173_at	GNAS	GNAS complex locus	3.169	9.864
1557418_at	ACSL4	acyl-CoA synthetase long-chain family member 4	3.163	6.834
216211_at	FAM208B	family with sequence similarity 208 member B	3.158	8.89
238449_at	SMG1P5	SMG1P5, nonsense mediated mRNA decay associated PI3K related kinase pseudogene 5	3.137	9.175
1556672_a_at	RBM6	RNA binding motif protein 6	3.132	8.852
213089_at	LOC100272216	uncharacterized LOC100272216	3.071	6.675
236816_at	NAA25	N(alpha)-acetyltransferase 25, NatB auxiliary subunit	3.069	7.326
1557718_at	PPP2R5C	protein phosphatase 2 regulatory subunit B'gamma	3.048	8.759
238549_at	CBFA2T2	CBFA2/RUNX1 translocation partner 2	3.047	6.257
236561_at	TGFBR1	transforming growth factor beta receptor 1	3.039	6.317
235927_at	XPO1	exportin 1	3.005	7.506
236367_at	SMG7	SMG7, nonsense mediated mRNA decay factor	3	7.418
241938_at	QKI	QKI, KH domain containing RNA binding	2.978	7.433
219049_at	CSGALNACT1	chondroitin sulfate N-acetylgalactosaminyltransferase 1	2.965	4.398
1553693_s_at	CBR4	carbonyl reductase 4	2.962	7.411
232478_at	MIR181A2HG	MIR181A2 host gene	2.953	4.651
244659_at	TRIP12	thyroid hormone receptor interactor 12	2.949	9.301
230270_at	PRPF38B	pre-mRNA processing factor 38B	2.943	9.224
204055_s_at	CTAGE5	CTAGE family member 5, ER export factor	2.929	7.045
1565786_x_at	FLJ45482	uncharacterized LOC645566	2.923	5.138
215888_at	PDS5B	PDS5 cohesin associated factor B	2.91	7.354
215599_at	GUSBP9///GUSBP3	glucuronidase, beta pseudogene 9///glucuronidase, beta pseudogene 3	2.902	5.261
230885_at	LOC101930112///SPG7	uncharacterized LOC101930112///SPG7, paraplegin matrix AAA peptidase subunit	2.892	6.808
216527_at	HCG18	HLA complex group 18 (non-protein coding)	2.891	6.693
1557065_at	YLPM1	YLP motif containing 1	2.871	8.543
233063_s_at	GMDS-AS1	GMDS antisense RNA 1 (head to head)	2.859	6.403
232879_at	CRTC3	CREB regulated transcription coactivator 3	2.845	7.729
229584_at	LRRK2	leucine rich repeat kinase 2	2.84	2.178
238736_at	REV3L	REV3 like, DNA directed polymerase zeta catalytic subunit	2.838	6.915
239740_at	ETV6	ETS variant 6	2.825	6.774
227952_at	ZNF595	zinc finger protein 595	2.822	2.635
232489_at	TRMT13	tRNA methyltransferase 13 homolog	2.821	7.571
1558678_s_at	MALAT1	metastasis associated lung adenocarcinoma transcript 1 (non-protein coding)	2.814	7.083
236976_at	FANCA	Fanconi anemia complementation group A	2.813	6.992
230707_at	SORL1	sortilin related receptor 1	2.784	5.991
210528_at	MR1	major histocompatibility complex, class I-related	2.777	5.926
232034_at	LINC00537	long intergenic non-protein coding RNA 537	2.773	6.463
1559490_at	LRCH3	leucine rich repeats and calponin homology domain containing 3	2.77	7.112
1556035_s_at	ZNF207	zinc finger protein 207	2.764	8.502
222310_at	SCAF4	SR-related CTD associated factor 4	2.762	5.366
213359_at	HNRNPD	heterogeneous nuclear ribonucleoprotein D	2.758	7.266
234366_x_at	IGLJ3///CKAP2///IGLV@///IGLC1	immunoglobulin lambda joining 3///cytoskeleton associated protein 2///immunoglobulin lambda variable cluster///immunoglobulin lambda constant 1	2.757	2.395
228387_at	LINC01355	long intergenic non-protein coding RNA 1355	2.754	8.13
229455_at	LOC102723694	uncharacterized LOC102723694	2.752	7.386
228426_at	CLEC2D	C-type lectin domain family 2 member D	2.744	4.438
1568983_a_at	GABPB1-AS1	GABPB1 antisense RNA 1	2.744	3.552
240052_at	ITPR1	inositol 1,4,5-trisphosphate receptor type 1	2.733	6.962
217671_at	DSERG1	Down syndrome encephalopathy related protein 1	2.723	7.913
243824_at	LINC01410	long intergenic non-protein coding RNA 1410	2.723	7.094
239014_at	CCAR1	cell division cycle and apoptosis regulator 1	2.715	8.126
233463_at	RASSF6	Ras association domain family member 6	2.706	5.083
228613_at	RAB11FIP3	RAB11 family interacting protein 3	2.703	7.183
1556053_at	DNAJC7	DnaJ heat shock protein family (Hsp40) member C7	2.686	7.401
221616_s_at	TAF9B	TATA-box binding protein associated factor 9b	2.685	5.005
229513_at	STRBP	spermatid perinuclear RNA binding protein	2.676	5.888
223797_at	LOC114224	uncharacterized LOC114224	2.667	8.242
235469_at	FAM133DP///FAM133B	family with sequence similarity 133, member A pseudogene///family with sequence similarity 133 member B	2.659	5.77
235926_at	ANAPC5	anaphase promoting complex subunit 5	2.654	7.712
232098_at	DST	dystonin	2.64	3.186
214917_at	PRKAA1	protein kinase AMP-activated catalytic subunit alpha 1	2.64	8.106
214657_s_at	MIR612///NEAT1	microRNA 612///nuclear paraspeckle assembly transcript 1 (non-protein coding)	2.637	6.553
236754_at	PPP1R2	protein phosphatase 1 regulatory inhibitor subunit 2	2.632	6.828
216510_x_at	IGHV3-23///IGHV4-31///IGHM///IGHG1///IGHA1	immunoglobulin heavy variable 3-23///immunoglobulin heavy variable 4-31///immunoglobulin heavy constant mu///immunoglobulin heavy constant gamma 1 (G1m marker)///immunoglobulin heavy constant alpha 1	2.61	3.137
1557267_s_at	GEN1	GEN1, Holliday junction 5' flap endonuclease	2.605	7.708
215921_at	NPIPA5///NPIPB6///NPIPB8///NPIPB3	nuclear pore complex interacting protein family member A5///nuclear pore complex interacting protein family member B6///nuclear pore complex interacting protein family member B8///nuclear pore complex interacting protein family member B3	2.602	5.148
1565703_at	SMAD4	SMAD family member 4	2.602	7.325
232055_at	SFXN1	sideroflexin 1	2.598	5.939
215470_at	GTF2H2B	general transcription factor IIH subunit 2B (pseudogene)	2.595	6.562
234884_x_at	CKAP2///IGLV@///IGLC1	cytoskeleton associated protein 2///immunoglobulin lambda variable cluster///immunoglobulin lambda constant 1	2.594	2.214
1559025_at	2023-09-09	septin 9	2.591	6.205
226811_at	FAM46C	family with sequence similarity 46 member C	2.565	4.208
1559214_at	FBXO22	F-box protein 22	2.563	5.367
227921_at	LOC105379499///FLJ45482	uncharacterized LOC105379499///uncharacterized LOC645566	2.563	6.107
236649_at	DTWD1	DTW domain containing 1	2.562	6.868
239930_at	GALNT2	polypeptide N-acetylgalactosaminyltransferase 2	2.561	6.426
232213_at	PELI1	pellino E3 ubiquitin protein ligase 1	2.559	6.576
238214_at	LRRC69	leucine rich repeat containing 69	2.558	7.169
1557081_at	RBM25	RNA binding motif protein 25	2.558	7.872
207492_at	NGLY1	N-glycanase 1	2.557	7.015
237107_at	PRKRA	protein activator of interferon induced protein kinase EIF2AK2	2.553	6.519
213472_at	HNRNPH1	heterogeneous nuclear ribonucleoprotein H1 (H)	2.552	6.485
1559739_at	CHPT1	choline phosphotransferase 1	2.55	8.241
230494_at	SLC20A1	solute carrier family 20 member 1	2.55	6.223
228723_at	NPTN-IT1	NPTN intronic transcript 1	2.54	7.2
1560128_x_at	C5orf56	chromosome 5 open reading frame 56	2.534	7.432
1556493_a_at	KDM4C	lysine demethylase 4C	2.529	6.612
215611_at	TCF12	transcription factor 12	2.511	7.311
205316_at	SLC15A2	solute carrier family 15 member 2	2.508	6.863
242060_x_at	PHF11	PHD finger protein 11	2.5	5.735
232551_at	SLC26A6	solute carrier family 26 member 6	2.495	8.205
237759_at	CD48	CD48 molecule	2.494	6.313
1553145_at	TAPT1-AS1	TAPT1 antisense RNA 1 (head to head)	2.488	6.591
1560145_at	MKLN1	muskelin 1	2.484	7.707
244700_at	SEC61B	Sec61 translocon beta subunit	2.483	6.732
215209_at	SEC24D	SEC24 homolog D, COPII coat complex component	2.481	3.777
218589_at	LPAR6	lysophosphatidic acid receptor 6	2.476	5.045
213212_x_at	LOC102724093///GOLGA6L4///GOLGA6L9///GOLGA6L5P	golgin subfamily A member 6-like protein 4///golgin A6 family-like 4///golgin A6 family-like 9///golgin A6 family-like 5, pseudogene	2.469	6.039
230128_at	CKAP2	cytoskeleton associated protein 2	2.466	3.833
1568943_at	INPP5D	inositol polyphosphate-5-phosphatase D	2.46	7.503
236431_at	U2SURP	U2 snRNP associated SURP domain containing	2.457	7.838
229272_at	FNBP4	formin binding protein 4	2.451	4.885
1557305_at	TACC1	transforming acidic coiled-coil containing protein 1	2.435	7.498
215318_at	MINOS1P1	mitochondrial inner membrane organizing system 1 pseudogene 1	2.427	6.401
243664_at	TXNL1	thioredoxin like 1	2.419	5.162
1568834_s_at	CCDC90B	coiled-coil domain containing 90B	2.413	7.771
227232_at	EVL	Enah/Vasp-like	2.407	6.506
214132_at	ATP5C1	ATP synthase, H+ transporting, mitochondrial F1 complex, gamma polypeptide 1	2.406	5.774
1562031_at	JAK2	Janus kinase 2	2.404	6.227
227074_at	CCDC18-AS1	CCDC18 antisense RNA 1	2.401	6.207
225107_at	HNRNPA2B1	heterogeneous nuclear ribonucleoprotein A2/B1	2.398	7.083
229413_s_at	PCGF3	polycomb group ring finger 3	2.397	6.321
215322_at	LONRF1	LON peptidase N-terminal domain and ring finger 1	2.393	6.647
232991_at	ARL17B///ARL17A	ADP ribosylation factor like GTPase 17B///ADP ribosylation factor like GTPase 17A	2.388	5.931
232311_at	B2M	beta-2-microglobulin	2.385	7.202
220220_at	LRRC37A2///LRRC37A4P	leucine rich repeat containing 37 member A2///leucine rich repeat containing 37 member A4, pseudogene	2.384	7.423
1554447_at	JPX	JPX transcript, XIST activator (non-protein coding)	2.383	4.927
203748_x_at	RBMS1	RNA binding motif single stranded interacting protein 1	2.374	4.485
232623_at	LOC100128751	INM04	2.373	7.159
228071_at	GIMAP7	GTPase, IMAP family member 7	2.365	2.202
214641_at	COL4A3	collagen type IV alpha 3 chain	2.359	6.33
238295_at	TEFM	transcription elongation factor, mitochondrial	2.354	5.772
228152_s_at	DDX60L	DEAD-box helicase 60-like	2.352	2.711
215268_at	KIAA0754	KIAA0754	2.35	6.034
1558486_at	ZNF493	zinc finger protein 493	2.35	6.443
208109_s_at	LINC00597	long intergenic non-protein coding RNA 597	2.349	5.757
220576_at	PGAP1	post-GPI attachment to proteins 1	2.345	4.801
226840_at	H2AFY	H2A histone family member Y	2.342	7.229
227884_at	TAF15	TATA-box binding protein associated factor 15	2.342	5.896
216765_at	MAP2K5	mitogen-activated protein kinase kinase 5	2.34	7.004
1556277_a_at	PAPD4	poly(A) RNA polymerase D4, non-canonical	2.34	6.244
1554501_at	TSC22D4	TSC22 domain family member 4	2.34	6.842
220704_at	IKZF1	IKAROS family zinc finger 1	2.338	4.386
1557706_at	ZHX2	zinc fingers and homeoboxes 2	2.336	6.655
213856_at	CD47	CD47 molecule	2.33	7.752
214815_at	TRIM33	tripartite motif containing 33	2.329	6.036
240990_at	RAB5A	RAB5A, member RAS oncogene family	2.328	6.383
231166_at	GPR155	G protein-coupled receptor 155	2.325	3.986
220710_at	ANP32A-IT1	ANP32A intronic transcript 1	2.323	7.187
216983_s_at	ZNF224	zinc finger protein 224	2.309	7.569
236841_at	LOC100134445	uncharacterized LOC100134445	2.296	6.936
240586_at	ENAM	enamelin	2.29	4.239
1555878_at	RPS24	ribosomal protein S24	2.29	6.586
232330_at	COA1	cytochrome c oxidase assembly factor 1 homolog	2.289	7.849
243179_at	LOC101928433	uncharacterized LOC101928433	2.287	6.695
1557360_at	LRPPRC	leucine rich pentatricopeptide repeat containing	2.276	5.845
235482_at	PCBP1-AS1	PCBP1 antisense RNA 1	2.276	6.964
239511_s_at	SRSF4	serine and arginine rich splicing factor 4	2.275	6.629
1556049_at	RTN4	reticulon 4	2.274	7.116
236019_at	RAB12	RAB12, member RAS oncogene family	2.271	7.922
212980_at	AHSA2	AHA1, activator of heat shock 90kDa protein ATPase homolog 2 (yeast)	2.269	6.839
232613_at	PBRM1	polybromo 1	2.268	5.841
234210_x_at	ACTR2	ARP2 actin related protein 2 homolog	2.267	7.211
236621_at	RPS27	ribosomal protein S27	2.267	6.064
236316_at	FAM3C	family with sequence similarity 3 member C	2.262	4.346
211386_at	MGC12488	uncharacterized protein MGC12488	2.26	6.081
220546_at	LOC101929115///KMT2A	uncharacterized LOC101929115///lysine methyltransferase 2A	2.254	7.165
207078_at	MED6	mediator complex subunit 6	2.254	6.469
215151_at	DOCK10	dedicator of cytokinesis 10	2.252	6.191
222087_at	MIR1204///PVT1	microRNA 1204///Pvt1 oncogene (non-protein coding)	2.251	6.467
215336_at	AKAP11	A-kinase anchoring protein 11	2.249	7.471
234762_x_at	NLN	neurolysin	2.248	6.467
1568865_at	FNTB	farnesyltransferase, CAAX box, beta	2.245	5.666
213517_at	PCBP2	poly(rC) binding protein 2	2.24	5.916
231904_at	U2AF1	U2 small nuclear RNA auxiliary factor 1	2.239	7.076
1569126_at	CCNC	cyclin C	2.233	5.512
233874_at	SLAIN2	SLAIN motif family member 2	2.233	6.009
220221_at	VPS13D	vacuolar protein sorting 13 homolog D	2.231	6.788
242280_x_at	CPEB4	cytoplasmic polyadenylation element binding protein 4	2.229	5.594
206169_x_at	ZC3H7B	zinc finger CCCH-type containing 7B	2.215	6.462
81737_at	LOC100505915	uncharacterized LOC100505915	2.209	5.844
220035_at	NUP210	nucleoporin 210	2.207	5.956
233019_at	CNOT7	CCR4-NOT transcription complex subunit 7	2.203	6.32
233869_x_at	DKFZP586B0319	DKFZP586B0319 protein	2.201	7.169
226877_at	RPL32P3	ribosomal protein L32 pseudogene 3	2.199	6.788
211996_s_at	LOC101060275///NPIPA5///NPIPB5///NPIPB11///LOC613037///NPIPB4///NPIPB3	putative NPIP-like protein LOC613037///nuclear pore complex interacting protein family member A5///nuclear pore complex interacting protein family member B5///nuclear pore complex interacting protein family member B11///nuclear pore complex interacting protein member///nuclear pore complex interacting protein family member B4///nuclear pore complex interacting protein family member B3	2.198	7.409
244427_at	KIF23	kinesin family member 23	2.194	7.499
1556088_at	RPAIN	RPA interacting protein	2.194	6.835
232180_at	UGP2	UDP-glucose pyrophosphorylase 2	2.194	5.549
1569142_at	TRIM13	tripartite motif containing 13	2.18	7.393
241425_at	NUP58	nucleoporin 58	2.175	6.71
211650_x_at	IGHV3-23///IGHV4-31///IGHM///IGHG3///IGHG1///IGHD///IGHA1///IGH	immunoglobulin heavy variable 3-23///immunoglobulin heavy variable 4-31///immunoglobulin heavy constant mu///immunoglobulin heavy constant gamma 3 (G3m marker)///immunoglobulin heavy constant gamma 1 (G1m marker)///immunoglobulin heavy constant delta///immunoglobulin heavy constant alpha 1///immunoglobulin heavy locus	2.173	4.74
236700_at	EIF3C	eukaryotic translation initiation factor 3 subunit C	2.172	5.986
228392_at	ZNF302	zinc finger protein 302	2.172	5.059
215175_at	PCNX1	pecanex homolog 1 (Drosophila)	2.169	4.394
216682_s_at	SUPT20H	SPT20 homolog, SAGA complex component	2.165	6.128
1553165_at	SYNRG	synergin, gamma	2.161	6.129
212913_at	MSH5-SAPCD1///SAPCD1	MSH5-SAPCD1 readthrough (NMD candidate)///suppressor APC domain containing 1	2.159	4.511
1569519_at	LOC102724250///NBPF26///NBPF10///NBPF8///NBPF9///NBPF15///NBPF11///NBPF12///NBPF1///NBPF14	neuroblastoma breakpoint family member 1///neuroblastoma breakpoint family member 26///neuroblastoma breakpoint family member 10///neuroblastoma breakpoint family member 8///neuroblastoma breakpoint family member 9///neuroblastoma breakpoint family member 15///neuroblastoma breakpoint family member 11///neuroblastoma breakpoint family member 12///neuroblastoma breakpoint family member 1///neurobl…	2.157	5.456
232346_at	LOC388692	uncharacterized LOC388692	2.157	6.865
232633_at	XRCC5	X-ray repair cross complementing 5	2.157	7.311
212956_at	TBC1D9	TBC1 domain family member 9	2.156	3.04
242512_at	MYO9A	myosin IXA	2.149	5.368
215002_at	NPIPA5///NPIPB5///NPIPB11///NPIPB8///LOC613037///NPIPB4///NPIPB3	nuclear pore complex interacting protein family member A5///nuclear pore complex interacting protein family member B5///nuclear pore complex interacting protein family member B11///nuclear pore complex interacting protein family member B8///nuclear pore complex interacting protein member///nuclear pore complex interacting protein family member B4///nuclear pore complex interacting protein family …	2.146	4.297
232182_at	LOC286272	uncharacterized LOC286272	2.144	3.996
221919_at	HNRNPA1	heterogeneous nuclear ribonucleoprotein A1	2.136	6.94
242427_at	WAC	WW domain containing adaptor with coiled-coil	2.136	4.715
244766_at	LOC102723773///LOC101060604///LOC101060596///LOC101060386///SMG1P7///NPIPA5///SMG1P3///NPIPB5///SMG1P1///LOC613037///SMG1P5///BOLA2///SMG1P2///NPIPB4///SLC7A5P1///SMG1	serine/threonine-protein kinase SMG1-like///putative L-type amino acid transporter 1-like protein IMAA///serine/threonine-protein kinase SMG1-like///putative uncharacterized SMG1-like protein///SMG1P7, nonsense mediated mRNA decay associated PI3K related kinase pseudogene 7///nuclear pore complex interacting protein family member A5///SMG1P3, nonsense mediated mRNA decay associated PI3K related k…	2.133	6.82
214723_x_at	ANKRD36	ankyrin repeat domain 36	2.132	3.478
212921_at	SMYD2	SET and MYND domain containing 2	2.132	8.175
230077_at	SDHAP2///SDHAP1///LOC220729///SDHA	succinate dehydrogenase complex flavoprotein subunit A pseudogene 2///succinate dehydrogenase complex flavoprotein subunit A pseudogene 1///succinate dehydrogenase complex flavoprotein subunit A pseudogene///succinate dehydrogenase complex flavoprotein subunit A	2.127	7.35
232371_at	2023-03-07	membrane associated ring-CH-type finger 7	2.124	7.939
239086_at	IDNK	IDNK, gluconokinase	2.124	4.851
238456_at	LOC100289230	uncharacterized LOC100289230	2.124	4.558
205518_s_at	CMAHP	cytidine monophospho-N-acetylneuraminic acid hydroxylase, pseudogene	2.123	2.701
230028_at	KIAA0907	KIAA0907	2.121	7.126
1563497_at	USP25	ubiquitin specific peptidase 25	2.116	7.09
238886_at	TMED10	transmembrane p24 trafficking protein 10	2.113	7.02
1555920_at	CBX3	chromobox 3	2.108	6.047
214163_at	HSPB11	heat shock protein family B (small) member 11	2.103	4.808
234949_at	FRG1BP	FSHD region gene 1 family member B, pseudogene	2.101	6.699
215170_s_at	CEP152	centrosomal protein 152	2.099	6.862
226808_at	ZNF862	zinc finger protein 862	2.096	5.712
220609_at	LOC202181	SUMO interacting motifs containing 1 pseudogene	2.094	5.414
1562110_at	IWS1	IWS1, SUPT6H interacting protein	2.09	6.985
230805_at	MIR142	microRNA 142	2.081	5.879
219574_at	2023-03-01	membrane associated ring-CH-type finger 1	2.077	3.707
231989_s_at	LOC101060604///NPIPA5///SMG1P3///NPIPB5///SMG1P1///LOC613037///NPIPB4///SLC7A5P1///NPIPB3	putative L-type amino acid transporter 1-like protein IMAA///nuclear pore complex interacting protein family member A5///SMG1P3, nonsense mediated mRNA decay associated PI3K related kinase pseudogene 3///nuclear pore complex interacting protein family member B5///SMG1P1, nonsense mediated mRNA decay associated PI3K related kinase pseudogene 1///nuclear pore complex interacting protein member///nu…	2.074	7.186
226934_at	CPSF6	cleavage and polyadenylation specific factor 6	2.069	6.728
235720_at	CRIP3	cysteine rich protein 3	2.069	6.538
1552622_s_at	UPK3BL///POLR2J3///LOC441259///POLR2J2///POLR2J	uroplakin 3B-like///RNA polymerase II subunit J3///PMS1 homolog 2, mismatch repair system component pseudogene///RNA polymerase II subunit J2///RNA polymerase II subunit J	2.069	4.484
212719_at	PHLPP1	PH domain and leucine rich repeat protein phosphatase 1	2.066	3.788
1557828_a_at	TMEM267	transmembrane protein 267	2.064	6.113
1568815_a_at	DDX50	DEAD-box helicase 50	2.063	7.577
212813_at	JAM3	junctional adhesion molecule 3	2.063	4.135
243851_at	RAB3GAP2///AURKAPS1	RAB3 GTPase activating non-catalytic protein subunit 2///aurora kinase A pseudogene 1	2.063	6.669
228620_at	LOC101927027	uncharacterized LOC101927027	2.059	4.627
238982_at	DENR	density regulated re-initiation and release factor	2.058	7.529
206983_at	CCR6	C-C motif chemokine receptor 6	2.057	2.009
232516_x_at	DAP3	death associated protein 3	2.056	6.51
212454_x_at	HNRNPDL	heterogeneous nuclear ribonucleoprotein D like	2.053	7.081
232441_at	KRR1	KRR1, small subunit processome component homolog	2.053	6.41
208015_at	SMAD1	SMAD family member 1	2.053	4.176
218750_at	TAF1D	TATA-box binding protein associated factor, RNA polymerase I subunit D	2.047	7.703
208797_s_at	GOLGA8A	golgin A8 family member A	2.041	5.86
244508_at	2023-09-07	septin 7	2.038	2.848
244132_x_at	ZNF518A	zinc finger protein 518A	2.037	4.942
240111_at	RHOBTB3	Rho related BTB domain containing 3	2.027	6.752
229871_at	SAMD4B	sterile alpha motif domain containing 4B	2.026	7.121
239219_at	AURKB	aurora kinase B	2.023	3.577
226344_at	ZMAT1	zinc finger matrin-type 1	2.023	4.745
204759_at	RCBTB2	RCC1 and BTB domain containing protein 2	2.021	4.421
201034_at	ADD3	adducin 3	2.019	4.528
209315_at	HBS1L	HBS1 like translational GTPase	2.019	5.315
1556743_at	ZNF654	zinc finger protein 654	2.019	7.261
244654_at	MYO1G	myosin IG	2.013	5.302
1552719_at	CASC4	cancer susceptibility candidate 4	2.012	6.725
232012_at	CAPN1	calpain 1	2.011	7.266
226062_x_at	FAM63A	family with sequence similarity 63 member A	2.009	6.999
1561206_at	KLHL8	kelch like family member 8	2.009	4.25
205383_s_at	ZBTB20	zinc finger and BTB domain containing 20	2.009	4.289
215203_at	GOLGA4	golgin A4	2.006	7.399
229899_s_at	ZFAS1	ZNFX1 antisense RNA 1	2.006	6.061
215508_at	BUB1	BUB1 mitotic checkpoint serine/threonine kinase	2.005	5.682
1555858_at	THUMPD3-AS1	THUMPD3 antisense RNA 1	2.005	5.64
214594_x_at	ATP8B1	ATPase phospholipid transporting 8B1	1.998	7.083
1558621_at	CABLES1	Cdk5 and Abl enzyme substrate 1	1.994	4.772
215201_at	REPS1	RALBP1 associated Eps domain containing 1	1.993	5.411
1554595_at	SYMPK	symplekin	1.983	5.966
215567_at	FCF1	FCF1 rRNA-processing protein	1.982	5.952
1569940_at	SLC6A16	solute carrier family 6 member 16	1.978	5.852
205594_at	ZNF652	zinc finger protein 652	1.977	5.18
206848_at	COX20	COX20, cytochrome c oxidase assembly factor	1.974	6.418
222018_at	NACA	nascent polypeptide-associated complex alpha subunit	1.972	6.83
1556601_a_at	SPATA13	spermatogenesis associated 13	1.964	5.091
1556607_at	EHD4	EH domain containing 4	1.961	6.22
232483_at	MED17	mediator complex subunit 17	1.958	5.461
220521_s_at	ATG16L1	autophagy related 16 like 1	1.957	5.006
235217_at	LINC01004	long intergenic non-protein coding RNA 1004	1.956	5.352
229033_s_at	MUM1	melanoma associated antigen (mutated) 1	1.954	4.854
220720_x_at	MZT2B	mitotic spindle organizing protein 2B	1.954	6.763
1557675_at	RAF1	Raf-1 proto-oncogene, serine/threonine kinase	1.954	7.011
244029_at	LOC100131043	uncharacterized LOC100131043	1.953	4.478
236492_at	PPP2R2A	protein phosphatase 2 regulatory subunit Balpha	1.952	7.145
1559249_at	ATXN1	ataxin 1	1.95	2.621
1560659_at	LINC00342	long intergenic non-protein coding RNA 342	1.948	5.776
233399_x_at	ZNF252P	zinc finger protein 252, pseudogene	1.948	4.814
238732_at	COL24A1	collagen type XXIV alpha 1 chain	1.941	3.621
1554608_at	TGOLN2	trans-golgi network protein 2	1.938	5.609
243092_at	PAN3-AS1	PAN3 antisense RNA 1	1.934	5.293
241385_at	LARP7	La ribonucleoprotein domain family member 7	1.931	6.31
222336_at	SMIM14	small integral membrane protein 14	1.926	6.114
232045_at	PHACTR1	phosphatase and actin regulator 1	1.925	4.013
232030_at	EPG5	ectopic P-granules autophagy protein 5 homolog	1.922	4.376
235315_at	TSC22D1	TSC22 domain family member 1	1.921	2.495
218793_s_at	SCML1	sex comb on midleg-like 1 (Drosophila)	1.92	6.16
238049_at	GRAMD3	GRAM domain containing 3	1.918	3.378
1561973_at	SMARCC2	SWI/SNF related, matrix associated, actin dependent regulator of chromatin subfamily c member 2	1.916	5.121
211634_x_at	IGHM	immunoglobulin heavy constant mu	1.915	2.022
239948_at	NUP153	nucleoporin 153	1.914	6.152
232362_at	CCDC18	coiled-coil domain containing 18	1.911	3.417
231911_at	ERMN	ermin	1.91	6.226
236930_at	LOC101930388///LOC101928143///NUMB	uncharacterized LOC101930388///uncharacterized LOC101928143///NUMB, endocytic adaptor protein	1.909	3.18
223679_at	CTNNB1	catenin beta 1	1.906	5.496
238055_at	LOC100505549	uncharacterized LOC100505549	1.904	5.177
226783_at	PHYKPL	5-phosphohydroxy-L-lysine phospho-lyase	1.904	5.462
220918_at	RUNX1-IT1	RUNX1 intronic transcript 1	1.904	5.356
229261_at	SOS1-IT1	SOS1 intronic transcript 1	1.903	5.702
1559584_a_at	C16orf54	chromosome 16 open reading frame 54	1.902	3.166
209006_s_at	RSRP1	arginine and serine rich protein 1	1.901	4.8
230328_at	LOC101930306///RRN3P1///RRN3P2///RRN3	uncharacterized LOC101930306///RRN3 homolog, RNA polymerase I transcription factor pseudogene 1///RRN3 homolog, RNA polymerase I transcription factor pseudogene 2///RRN3 homolog, RNA polymerase I transcription factor	1.899	6.439
244377_at	SLC1A4	solute carrier family 1 member 4	1.899	5.35
1557477_at	STIM1	stromal interaction molecule 1	1.899	4.943
1559964_at	LOC401261	uncharacterized LOC401261	1.898	5.011
203397_s_at	GALNT3	polypeptide N-acetylgalactosaminyltransferase 3	1.896	2.624
219403_s_at	HPSE	heparanase	1.894	2.951
229814_at	TNFAIP8	TNF alpha induced protein 8	1.893	5.554
243256_at	MKNK1	MAP kinase interacting serine/threonine kinase 1	1.889	5.185
240246_at	FRG1JP	FSHD region gene 1 family member J, pseudogene	1.886	6.153
202127_at	PRPF4B	pre-mRNA processing factor 4B	1.879	7.22
215024_at	CCZ1B	CCZ1 homolog B, vacuolar protein trafficking and biogenesis associated	1.877	5.72
238880_at	GTF3A	general transcription factor IIIA	1.877	5.691
209447_at	SYNE1	spectrin repeat containing nuclear envelope protein 1	1.873	3.741
214715_x_at	ZNF160	zinc finger protein 160	1.87	6.481
1559582_at	RHOQ	ras homolog family member Q	1.869	5.796
220774_at	DYM	dymeclin	1.867	5.402
218502_s_at	TRPS1	transcriptional repressor GATA binding 1	1.86	5.709
238642_at	ANKRD13D	ankyrin repeat domain 13D	1.853	7.794
238987_at	B4GALT1	beta-1,4-galactosyltransferase 1	1.852	4.831
221973_at	LOC100506123///LOC100506076	uncharacterized LOC100506123///uncharacterized LOC100506076	1.852	4.649
1559593_a_at	MED26	mediator complex subunit 26	1.847	6.788
208054_at	HERC4	HECT and RLD domain containing E3 ubiquitin protein ligase 4	1.843	5.979
1556967_at	ZDHHC14	zinc finger DHHC-type containing 14	1.838	5.504
235199_at	RNF125	ring finger protein 125	1.837	2.609
242492_at	CLNS1A	chloride nucleotide-sensitive channel 1A	1.835	6.559
216557_x_at	IGHV4-31///IGHM///IGHG3///IGHG1///IGHD///IGHA1	immunoglobulin heavy variable 4-31///immunoglobulin heavy constant mu///immunoglobulin heavy constant gamma 3 (G3m marker)///immunoglobulin heavy constant gamma 1 (G1m marker)///immunoglobulin heavy constant delta///immunoglobulin heavy constant alpha 1	1.833	2.966
212384_at	ATP6V1G2-DDX39B///SNORD84///DDX39B	ATP6V1G2-DDX39B readthrough (NMD candidate)///small nucleolar RNA, C/D box 84///DEAD-box helicase 39B	1.831	6.743
241388_at	LOC101927451	uncharacterized LOC101927451	1.831	5.468
1563455_at	SIK3	SIK family kinase 3	1.831	6.003
232135_at	SAP30L	SAP30 like	1.83	5.765
203096_s_at	RAPGEF2	Rap guanine nucleotide exchange factor 2	1.828	3.087
233226_at	PTPN9	protein tyrosine phosphatase, non-receptor type 9	1.827	4.973
1553292_s_at	SGK494	uncharacterized serine/threonine-protein kinase SgK494	1.824	5.569
1557283_a_at	ZNF519	zinc finger protein 519	1.823	7.029
243709_at	SLC38A9	solute carrier family 38 member 9	1.821	3.796
239283_at	TMED5	transmembrane p24 trafficking protein 5	1.82	5.746
243649_at	FBXO7	F-box protein 7	1.819	4.353
204446_s_at	ALOX5	arachidonate 5-lipoxygenase	1.818	2.807
217317_s_at	HERC2P9///HERC2P2	hect domain and RLD 2 pseudogene 9///hect domain and RLD 2 pseudogene 2	1.818	5.132
206965_at	KLF12	Kruppel like factor 12	1.818	4.436
215600_x_at	FBXW12	F-box and WD repeat domain containing 12	1.816	7.295
222152_at	PDCD6	programmed cell death 6	1.815	6.421
223915_at	BCOR	BCL6 corepressor	1.814	6.782
231825_x_at	ATF7IP	activating transcription factor 7 interacting protein	1.813	6.262
232469_x_at	SSBP3-AS1	SSBP3 antisense RNA 1	1.81	6.223
226999_at	RNPC3	RNA binding region (RNP1, RRM) containing 3	1.801	6.023
215588_x_at	RIOK3	RIO kinase 3	1.8	5.19
235536_at	SNORD89	small nucleolar RNA, C/D box 89	1.799	4.625
242903_at	IFNGR1	interferon gamma receptor 1	1.795	3.913
239742_at	LOC101930415	uncharacterized LOC101930415	1.793	3.439
238744_at	DPH6	diphthamine biosynthesis 6	1.784	4.335
1554638_at	ZFYVE16	zinc finger FYVE-type containing 16	1.784	4.55
215143_at	DPY19L2P2	DPY19L2 pseudogene 2	1.783	6.984
211929_at	HNRNPA3	heterogeneous nuclear ribonucleoprotein A3	1.783	5.406
204165_at	WASF1	WAS protein family member 1	1.783	3.376
203337_x_at	ITGB1BP1	integrin subunit beta 1 binding protein 1	1.779	3.052
238560_at	CALCOCO2	calcium binding and coiled-coil domain 2	1.778	6.475
236836_at	LOC105379045	uncharacterized LOC105379045	1.778	5.569
1563629_a_at	ERVK13-1	endogenous retrovirus group K13 member 1	1.77	4.585
228480_at	VAPA	VAMP associated protein A	1.77	4.658
1557585_at	ATP6V1H	ATPase H+ transporting V1 subunit H	1.768	5.536
1556373_a_at	FAM185A	family with sequence similarity 185 member A	1.767	4.948
228643_at	RAB30-AS1	RAB30 antisense RNA 1 (head to head)	1.764	3.399
219371_s_at	KLF2	Kruppel like factor 2	1.76	4.531
228390_at	RAB30	RAB30, member RAS oncogene family	1.76	3.719
1558739_at	BORCS5	BLOC-1 related complex subunit 5	1.758	4.422
235902_at	HERC2P7	hect domain and RLD 2 pseudogene 7	1.758	3.565
206316_s_at	KNTC1	kinetochore associated 1	1.751	4.876
1570210_x_at	PPP6R2	protein phosphatase 6 regulatory subunit 2	1.751	6.477
215011_at	SNHG3///SNORA73A	small nucleolar RNA host gene 3///small nucleolar RNA, H/ACA box 73A	1.749	6.352
233089_at	QRSL1	glutaminyl-tRNA synthase (glutamine-hydrolyzing)-like 1	1.747	6.033
214673_s_at	HUWE1	HECT, UBA and WWE domain containing 1, E3 ubiquitin protein ligase	1.746	5.94
213666_at	2023-09-06	septin 6	1.745	5.609
237475_x_at	CCDC152	coiled-coil domain containing 152	1.745	6.788
230710_at	MIR210HG	MIR210 host gene	1.744	4.524
226419_s_at	SRSF1	serine and arginine rich splicing factor 1	1.744	5.851
215694_at	SPATA5L1	spermatogenesis associated 5 like 1	1.742	3.859
221530_s_at	BHLHE41	basic helix-loop-helix family member e41	1.74	2.082
1557945_at	TCTE3	t-complex-associated-testis-expressed 3	1.738	6.485
227835_at	LOC389831	uncharacterized LOC389831	1.734	2.034
239442_at	CEP68	centrosomal protein 68	1.731	6.973
205976_at	FASTKD2	FAST kinase domains 2	1.731	4.544
215067_x_at	PRDX2	peroxiredoxin 2	1.731	5.954
232017_at	TJP2	tight junction protein 2	1.73	4.305
1556597_a_at	LOC284513	uncharacterized LOC284513	1.726	4.191
1558686_at	MPV17L	MPV17 mitochondrial inner membrane protein like	1.725	4.965
210656_at	EED	embryonic ectoderm development	1.722	5.138
1557293_at	LINC00969	long intergenic non-protein coding RNA 969	1.72	5.598
226670_s_at	PABPC1L	poly(A) binding protein cytoplasmic 1 like	1.72	5.84
210347_s_at	BCL11A	B-cell CLL/lymphoma 11A	1.719	4.672
225740_x_at	MDM4	MDM4, p53 regulator	1.718	5.965
239188_at	PPP2R3C	protein phosphatase 2 regulatory subunit B''gamma	1.718	5.528
233014_at	IDI1	isopentenyl-diphosphate delta isomerase 1	1.717	5.489
232586_x_at	LOC100133315	transient receptor potential cation channel, subfamily C, member 2-like	1.716	4.449
215985_at	HCG8///ZNRD1ASP	HLA complex group 8///zinc ribbon domain containing 1 antisense, pseudogene	1.714	7.219
1559128_at	HSDL2	hydroxysteroid dehydrogenase like 2	1.714	6.322
231592_at	TSIX	TSIX transcript, XIST antisense RNA	1.711	2.826
1569320_at	GPBP1L1	GC-rich promoter binding protein 1 like 1	1.709	3.869
220572_at	LOC100506282	uncharacterized LOC100506282	1.709	5.33
213596_at	CASP4	caspase 4	1.707	4.953
237005_at	EMC3-AS1	EMC3 antisense RNA 1	1.707	6.038
1565743_at	N4BP2L2	NEDD4 binding protein 2 like 2	1.707	5.952
225421_at	PM20D2	peptidase M20 domain containing 2	1.707	3.387
225017_at	CCDC14	coiled-coil domain containing 14	1.703	5.525
224826_at	GPCPD1	glycerophosphocholine phosphodiesterase 1	1.703	5.985
231954_at	MIR4453///DKFZP434I0714	microRNA 4453///uncharacterized protein DKFZP434I0714	1.703	6.614
217731_s_at	ITM2B	integral membrane protein 2B	1.702	3.272
233068_at	CRIPT	CXXC repeat containing interactor of PDZ3 domain	1.701	4.245
234759_at	LOC100287497	septin 7 pseudogene	1.7	4.15
233101_at	MTMR9	myotubularin related protein 9	1.7	6.798
215179_x_at	PGF	placental growth factor	1.699	5.991
227724_at	NUTM2B-AS1///NUTM2A-AS1	NUTM2B antisense RNA 1///NUTM2A antisense RNA 1	1.698	5.701
239237_at	TRG-AS1	T cell receptor gamma locus antisense RNA 1	1.697	2.714
210424_s_at	LOC101930583///GOLGA8B///GOLGA8A	uncharacterized LOC101930583///golgin A8 family member B///golgin A8 family member A	1.695	5.438
1557118_a_at	INTS6-AS1	INTS6 antisense RNA 1	1.692	4.52
208358_s_at	UGT8	UDP glycosyltransferase 8	1.692	4.233
234981_x_at	CMBL	carboxymethylenebutenolidase homolog	1.689	6.845
221264_s_at	TARDBP	TAR DNA binding protein	1.688	5.454
232722_at	RNASET2	ribonuclease T2	1.687	6.514
215058_at	DENND5B	DENN domain containing 5B	1.685	4.558
242876_at	AKT3	AKT serine/threonine kinase 3	1.684	6.16
228577_x_at	ODF2L	outer dense fiber of sperm tails 2 like	1.683	4.585
215920_s_at	NPIPA5///NPIPB6///NPIPB15///PDXDC2P///NPIPB3///NPIPA1	nuclear pore complex interacting protein family member A5///nuclear pore complex interacting protein family member B6///nuclear pore complex interacting protein family member B15///pyridoxal dependent decarboxylase domain containing 2, pseudogene///nuclear pore complex interacting protein family member B3///nuclear pore complex interacting protein family member A1	1.681	5.856
1560081_at	RAD51-AS1	RAD51 antisense RNA 1 (head to head)	1.68	4.677
218976_at	DNAJC12	DnaJ heat shock protein family (Hsp40) member C12	1.679	2.267
203020_at	RABGAP1L	RAB GTPase activating protein 1 like	1.677	4.456
212845_at	SAMD4A	sterile alpha motif domain containing 4A	1.676	3.461
1555960_at	HINT1	histidine triad nucleotide binding protein 1	1.675	5.642
204563_at	SELL	selectin L	1.668	3.325
235526_at	SOX6	SRY-box 6	1.663	4.397
236918_s_at	LRRC34	leucine rich repeat containing 34	1.662	2.773
204131_s_at	FOXO3	forkhead box O3	1.66	2.815
229457_at	ANKHD1	ankyrin repeat and KH domain containing 1	1.659	6.599
220603_s_at	MCTP2	multiple C2 and transmembrane domain containing 2	1.659	2.23
238412_at	LOC101060405///RRN3P3	putative RRN3-like protein RRN3P1///RRN3 homolog, RNA polymerase I transcription factor pseudogene 3	1.656	6.011
237560_at	MRPS5	mitochondrial ribosomal protein S5	1.656	5.156
207365_x_at	USP34	ubiquitin specific peptidase 34	1.656	5.735
217602_at	LOC101060363///PPIA	peptidyl-prolyl cis-trans isomerase A pseudogene///peptidylprolyl isomerase A	1.651	4.703
206792_x_at	LOC729966///PDE4C	uncharacterized LOC729966///phosphodiesterase 4C	1.651	6.515
230424_at	NREP	neuronal regeneration related protein	1.65	3.704
232179_at	LOC158863	uncharacterized LOC158863	1.649	5.376
243435_at	LOC101927338///KCNQ1OT1	uncharacterized LOC101927338///KCNQ1 opposite strand/antisense transcript 1 (non-protein coding)	1.647	5.671
227095_at	LEPROT	leptin receptor overlapping transcript	1.646	2.801
226404_at	RBM39	RNA binding motif protein 39	1.646	5.123
1570505_at	ABCB4	ATP binding cassette subfamily B member 4	1.643	3.951
1555892_s_at	PSMD5-AS1	PSMD5 antisense RNA 1 (head to head)	1.643	5.574
220071_x_at	HAUS2	HAUS augmin like complex subunit 2	1.641	6.587
241018_at	TMEM59	transmembrane protein 59	1.64	5.75
214705_at	PATJ	PATJ, crumbs cell polarity complex component	1.637	4.653
207563_s_at	OGT	O-linked N-acetylglucosamine (GlcNAc) transferase	1.636	5.641
220068_at	VPREB3	pre-B lymphocyte 3	1.635	4.297
231106_at	BMS1P6	BMS1, ribosome biogenesis factor pseudogene 6	1.634	5.152
1552621_at	UPK3BL///POLR2J3///POLR2J2///POLR2J	uroplakin 3B-like///RNA polymerase II subunit J3///RNA polymerase II subunit J2///RNA polymerase II subunit J	1.633	3.248
233321_x_at	LOC90834///BRD1	uncharacterized protein BC001742///bromodomain containing 1	1.632	6.095
215855_s_at	TMF1	TATA element modulatory factor 1	1.631	5.914
228999_at	CHD2	chromodomain helicase DNA binding protein 2	1.63	5.755
214369_s_at	RASGRP2	RAS guanyl releasing protein 2	1.628	2.806
242966_x_at	RFX2	regulatory factor X2	1.627	5.176
215404_x_at	FGFR1	fibroblast growth factor receptor 1	1.626	6.526
215504_x_at	ANKRD10-IT1	ANKRD10 intronic transcript 1	1.62	5.375
221850_x_at	LOC101060581///AGAP7P///AGAP12P///AGAP6///AGAP11///AGAP4	arf-GAP with GTPase, ANK repeat and PH domain-containing protein 5-like///ArfGAP with GTPase domain, ankyrin repeat and PH domain 7, pseudogene///ArfGAP with GTPase domain, ankyrin repeat and PH domain 12, pseudogene///ArfGAP with GTPase domain, ankyrin repeat and PH domain 6///ArfGAP with GTPase domain, ankyrin repeat and PH domain 11///ArfGAP with GTPase domain, ankyrin repeat and PH domain 4	1.62	5.297
1565716_at	FUS	FUS RNA binding protein	1.619	4.33
224667_x_at	ANAPC16	anaphase promoting complex subunit 16	1.616	5.943
238924_at	BMS1P5	BMS1, ribosome biogenesis factor pseudogene 5	1.613	4.858
221834_at	LOC100507577///LONP2	uncharacterized LOC100507577///lon peptidase 2, peroxisomal	1.611	5.152
1558802_at	TM2D1	TM2 domain containing 1	1.608	6.435
205771_s_at	AKAP7	A-kinase anchoring protein 7	1.607	2.31
240661_at	LOC100506459	uncharacterized LOC100506459	1.607	5.845
1559856_s_at	KMT2A	lysine methyltransferase 2A	1.606	4.608
215409_at	LPCAT4	lysophosphatidylcholine acyltransferase 4	1.606	6.196
229389_at	ATG16L2	autophagy related 16 like 2	1.605	4.542
1554455_at	LINS1	lines homolog 1	1.602	4.194
243683_at	MORF4L2	mortality factor 4 like 2	1.6	4.608
1560741_at	SNURF///SNRPN	SNRPN upstream reading frame///small nuclear ribonucleoprotein polypeptide N	1.6	4.805
243047_at	FAM193B	family with sequence similarity 193 member B	1.599	4.424
1558369_at	MPHOSPH9	M-phase phosphoprotein 9	1.599	6.224
214850_at	SMA4	glucuronidase beta pseudogene	1.598	3.944
235580_at	ZNF141	zinc finger protein 141	1.598	5.295
230664_at	H2BFXP	H2B histone family member X, pseudogene	1.595	2.684
238127_at	GAS6-AS1	GAS6 antisense RNA 1	1.594	2.031
236267_at	ZNF346	zinc finger protein 346	1.593	6.546
203126_at	IMPA2	inositol monophosphatase 2	1.59	3.204
1559094_at	FBXO9	F-box protein 9	1.587	5.601
232772_at	LOC221272	uncharacterized LOC221272	1.587	5.306
236562_at	ZNF439	zinc finger protein 439	1.587	4.169
227745_at	RNF139-AS1	RNF139 antisense RNA 1 (head to head)	1.584	5.214
211038_s_at	CROCCP2	ciliary rootlet coiled-coil, rootletin pseudogene 2	1.582	6.341
217104_at	ST20	suppressor of tumorigenicity 20	1.581	2.745
1557384_at	LOC100506639///ZNF131	uncharacterized LOC100506639///zinc finger protein 131	1.58	4.398
1557895_at	FLJ35934	FLJ35934	1.578	3.452
1558956_s_at	IFT80	intraflagellar transport 80	1.577	5.363
206828_at	TXK	TXK tyrosine kinase	1.577	3.583
219836_at	ZBED2	zinc finger BED-type containing 2	1.577	5.142
220735_s_at	SENP7	SUMO1/sentrin specific peptidase 7	1.575	3.998
212847_at	FUBP1	far upstream element binding protein 1	1.573	4.429
1555446_s_at	TRAPPC10	trafficking protein particle complex 10	1.571	5.342
205583_s_at	ALG13	ALG13, UDP-N-acetylglucosaminyltransferase subunit	1.569	5
217544_at	MIR3916	microRNA 3916	1.568	5.158
232980_at	LMBRD1	LMBR1 domain containing 1	1.562	2.833
216206_x_at	MAP2K7	mitogen-activated protein kinase kinase 7	1.557	6.25
233775_x_at	LOC100289333	uncharacterized LOC100289333	1.555	3.116
224428_s_at	CDCA7	cell division cycle associated 7	1.553	5.035
227793_at	MIRLET7D	microRNA let-7d	1.551	4.901
206061_s_at	DICER1	dicer 1, ribonuclease III	1.548	3.94
215978_x_at	ZNF721	zinc finger protein 721	1.548	4.499
240868_at	LOC100129406	uncharacterized LOC100129406	1.547	6.495
214241_at	NDUFB8	NADH:ubiquinone oxidoreductase subunit B8	1.545	5.069
211908_x_at	IGK	immunoglobulin kappa locus	1.544	3.872
237747_at	LOC100507281	uncharacterized LOC100507281	1.542	4.425
226301_at	SLC18B1	solute carrier family 18 member B1	1.541	2.577
236910_at	MRPL39	mitochondrial ribosomal protein L39	1.54	4.752
212689_s_at	KDM3A	lysine demethylase 3A	1.538	5.085
201294_s_at	WSB1	WD repeat and SOCS box containing 1	1.538	4.643
230403_at	RFX3	regulatory factor X3	1.537	4.157
239244_at	LOC100507616	uncharacterized LOC100507616	1.536	5.521
215349_at	BTBD18	BTB domain containing 18	1.534	5.192
204076_at	ENTPD4	ectonucleoside triphosphate diphosphohydrolase 4	1.534	3.948
1569257_at	FMNL1	formin like 1	1.534	4.688
1552334_at	TRIOBP	TRIO and F-actin binding protein	1.534	4.335
210965_x_at	CDK13	cyclin dependent kinase 13	1.533	5.681
1556318_s_at	CAND1	cullin associated and neddylation dissociated 1	1.532	3.965
241624_at	LOC389834	ankyrin repeat domain 57 pseudogene	1.53	5.771
232814_x_at	APOPT1	apoptogenic 1, mitochondrial	1.527	5.774
213546_at	DKFZP586I1420	uncharacterized protein DKFZp586I1420	1.527	5.5
215057_at	LINC00894	long intergenic non-protein coding RNA 894	1.527	6.343
209829_at	FAM65B	family with sequence similarity 65 member B	1.526	2.768
242578_x_at	SLC22A3	solute carrier family 22 member 3	1.526	5.366
225899_x_at	LOC101929819///LOC100133331///LOC100133182///LINC01001///LOC100132062///LOC729737///LINC01000///LINC01002	uncharacterized LOC101929819///uncharacterized LOC100133331///putative uncharacterized protein FLJ44672///long intergenic non-protein coding RNA 1001///uncharacterized LOC100132062///uncharacterized LOC729737///long intergenic non-protein coding RNA 1000///long intergenic non-protein coding RNA 1002	1.525	4.985
1562412_at	GPR89B	G protein-coupled receptor 89B	1.523	3.879
1557370_s_at	MYCBP2	MYC binding protein 2, E3 ubiquitin protein ligase	1.523	5.29
227934_at	KPNA5	karyopherin subunit alpha 5	1.52	4.772
1562238_at	USPL1	ubiquitin specific peptidase like 1	1.519	3.626
226641_at	ANKRD44	ankyrin repeat domain 44	1.518	4.074
242287_at	CLIP1	CAP-Gly domain containing linker protein 1	1.518	6.327
1556732_at	EML4	echinoderm microtubule associated protein like 4	1.517	3.302
222139_at	ERV3-2	endogenous retrovirus group 3 member 2	1.516	2.841
222285_at	IGHD	immunoglobulin heavy constant delta	1.516	4.465
204439_at	IFI44L	interferon induced protein 44 like	1.515	5.192
231270_at	LOC100507258///CA13	uncharacterized LOC100507258///carbonic anhydrase 13	1.515	2.612
1558697_a_at	KIAA0430	KIAA0430	1.514	4.904
204861_s_at	NAIP	NLR family apoptosis inhibitory protein	1.514	2.348
232230_at	OLMALINC	oligodendrocyte maturation-associated long intergenic non-coding RNA	1.514	2.867
1566079_at	RPS16P5	ribosomal protein S16 pseudogene 5	1.513	3.998
225327_at	FAM214A	family with sequence similarity 214 member A	1.512	3.208
1555996_s_at	MIR1248///SNORA81///SNORA4///SNORD2///SNORA63///EIF4A2	microRNA 1248///small nucleolar RNA, H/ACA box 81///small nucleolar RNA, H/ACA box 4///small nucleolar RNA, C/D box 2///small nucleolar RNA, H/ACA box 63///eukaryotic translation initiation factor 4A2	1.512	3.93
204352_at	TRAF5	TNF receptor associated factor 5	1.511	5.086
236386_at	SUZ12P1	SUZ12 polycomb repressive complex 2 subunit pseudogene 1	1.507	3.551
226651_at	HOMER1	homer scaffolding protein 1	1.506	2.424
225636_at	STAT2	signal transducer and activator of transcription 2	1.506	4.65
241755_at	UQCRC2	ubiquinol-cytochrome c reductase core protein II	1.501	4.297
221208_s_at	MSANTD2	Myb/SANT DNA binding domain containing 2	1.499	4.42
220796_x_at	SLC35E1	solute carrier family 35 member E1	1.496	4.588
231252_at	KANSL1L	KAT8 regulatory NSL complex subunit 1 like	1.493	4.736
228670_at	TEP1	telomerase associated protein 1	1.493	4.217
241483_at	CLNK	cytokine dependent hematopoietic cell linker	1.491	2.692
213748_at	TRIM66	tripartite motif containing 66	1.491	5.401
230235_at	MCTS1	MCTS1, re-initiation and release factor	1.487	5.122
214602_at	COL4A4	collagen type IV alpha 4 chain	1.486	4.24
1558088_a_at	UBE2I	ubiquitin conjugating enzyme E2 I	1.485	5.163
205098_at	CCR1	C-C motif chemokine receptor 1	1.483	2.653
240168_at	XPO7	exportin 7	1.483	5.884
221123_x_at	FBXO16///ZNF395	F-box protein 16///zinc finger protein 395	1.482	5.276
206551_x_at	KLHL24	kelch like family member 24	1.481	5.602
1553710_at	FAM218A	family with sequence similarity 218 member A	1.48	2.931
238775_at	ITFG1	integrin alpha FG-GAP repeat containing 1	1.477	4.831
1558002_at	STRAP	serine/threonine kinase receptor associated protein	1.475	6.339
1569362_at	ALCAM	activated leukocyte cell adhesion molecule	1.472	3.668
225626_at	PAG1	phosphoprotein membrane anchor with glycosphingolipid microdomains 1	1.472	2.13
242114_at	LOC101060424	otoancorin-like	1.471	5.064
229090_at	ZEB1-AS1	ZEB1 antisense RNA 1	1.471	4.604
212192_at	KCTD12	potassium channel tetramerization domain containing 12	1.469	2.21
1552789_at	SEC62	SEC62 homolog, preprotein translocation factor	1.469	3.008
232485_at	SNX29	sorting nexin 29	1.469	3.891
228216_at	ZBTB37	zinc finger and BTB domain containing 37	1.468	4.982
1556336_at	LOC101928747///RBMX///SNORD61	uncharacterized LOC101928747///RNA binding motif protein, X-linked///small nucleolar RNA, C/D box 61	1.467	4.131
224873_s_at	MRPS25	mitochondrial ribosomal protein S25	1.465	5.052
243108_at	RANBP9	RAN binding protein 9	1.462	5.794
226126_at	TBCK	TBC1 domain containing kinase	1.462	5.284
233530_at	SDCBP2-AS1	SDCBP2 antisense RNA 1	1.461	4.596
242735_x_at	ELF2	E74 like ETS transcription factor 2	1.456	6.387
215919_s_at	MRPS11	mitochondrial ribosomal protein S11	1.456	5.33
214291_at	RPL17-C18orf32///SNORD58C///SNORD58A///SNORD58B///RPL17	RPL17-C18orf32 readthrough///small nucleolar RNA, C/D box 58C///small nucleolar RNA, C/D box 58A///small nucleolar RNA, C/D box 58B///ribosomal protein L17	1.456	4.225
210985_s_at	SP100	SP100 nuclear antigen	1.456	2.455
244104_at	MGAT3	mannosyl (beta-1,4-)-glycoprotein beta-1,4-N-acetylglucosaminyltransferase	1.455	3.544
208488_s_at	CR1	complement component 3b/4b receptor 1 (Knops blood group)	1.454	3.082
235423_at	ORC2	origin recognition complex subunit 2	1.453	5.435
232463_at	LINC00685	long intergenic non-protein coding RNA 685	1.452	4.397
236295_s_at	NLRC3	NLR family CARD domain containing 3	1.45	4.572
214925_s_at	SPTAN1	spectrin alpha, non-erythrocytic 1	1.449	2.132
215887_at	ZNF277	zinc finger protein 277	1.449	4.914
234991_at	ZXDC	ZXD family zinc finger C	1.449	4.599
208498_s_at	ACTG1P4///AMY2B///AMY2A///AMY1C///AMY1B///AMY1A	actin gamma 1 pseudogene 4///amylase, alpha 2B (pancreatic)///amylase, alpha 2A (pancreatic)///amylase, alpha 1C (salivary)///amylase, alpha 1B (salivary)///amylase, alpha 1A (salivary)	1.443	3.567
228655_at	CHORDC1///NAALAD2	cysteine and histidine rich domain containing 1///N-acetylated alpha-linked acidic dipeptidase 2	1.441	5.293
213677_s_at	PMS1	PMS1 homolog 1, mismatch repair system component	1.44	5.005
244801_at	PSMB7	proteasome subunit beta 7	1.44	4.532
226969_at	MTR	5-methyltetrahydrofolate-homocysteine methyltransferase	1.439	4.38
204040_at	RNF144A	ring finger protein 144A	1.439	2.537
1565620_at	AGAP4	ArfGAP with GTPase domain, ankyrin repeat and PH domain 4	1.436	5.397
232645_at	LOC153684	uncharacterized LOC153684	1.436	3.733
230245_s_at	LINC00926	long intergenic non-protein coding RNA 926	1.435	3.503
212779_at	KIAA1109	KIAA1109	1.434	5.309
226110_at	PTAR1	protein prenyltransferase alpha subunit repeat containing 1	1.433	5.327
1559039_at	DHX36	DEAH-box helicase 36	1.432	4.978
213998_s_at	DDX17	DEAD-box helicase 17	1.43	5.271
235421_at	MAP3K8	mitogen-activated protein kinase kinase kinase 8	1.429	4.572
229240_at	ZDHHC21	zinc finger DHHC-type containing 21	1.429	4.611
220113_x_at	POLR1B	RNA polymerase I subunit B	1.428	6.4
215351_at	RTCA	RNA 3'-terminal phosphate cyclase	1.428	3.896
1559993_at	SFXN3	sideroflexin 3	1.426	5.001
238653_at	LRIG2	leucine rich repeats and immunoglobulin like domains 2	1.425	3.418
221139_s_at	CSAD	cysteine sulfinic acid decarboxylase	1.424	4.334
213686_at	VPS13A	vacuolar protein sorting 13 homolog A	1.424	5.708
242714_at	LOC101928429	uncharacterized LOC101928429	1.423	2.868
223590_at	ZNF700	zinc finger protein 700	1.423	4.795
232466_at	CUL4A	cullin 4A	1.421	3.748
225700_at	GLCCI1	glucocorticoid induced 1	1.42	2.518
226119_at	PCMTD1	protein-L-isoaspartate (D-aspartate) O-methyltransferase domain containing 1	1.419	3.492
1561238_at	PEX2	peroxisomal biogenesis factor 2	1.419	5.896
232648_at	PSMA3	proteasome subunit alpha 3	1.419	4.749
204681_s_at	RAPGEF5	Rap guanine nucleotide exchange factor 5	1.419	2.424
237076_at	NCSTN	nicastrin	1.418	3.501
206206_at	CD180	CD180 molecule	1.414	3.082
222317_at	PDE3B	phosphodiesterase 3B	1.414	2.04
230879_at	BAG2	BCL2 associated athanogene 2	1.413	4.612
244695_at	GHRLOS	ghrelin opposite strand/antisense RNA	1.413	5.593
228661_s_at	LOC102606465	uncharacterized LOC102606465	1.412	3.566
210697_at	ZNF257	zinc finger protein 257	1.412	4.592
1557350_at	G3BP1	G3BP stress granule assembly factor 1	1.411	2.907
220855_at	CLTC-IT1	CLTC intronic transcript 1 (non-protein coding)	1.41	5.954
206088_at	LRRC37A3	leucine rich repeat containing 37 member A3	1.41	4.559
227504_s_at	MED28	mediator complex subunit 28	1.41	6.268
213566_at	RNASE6	ribonuclease A family member k6	1.41	4.578
228932_at	AGO3	argonaute 3, RISC catalytic component	1.409	3.862
237591_at	LINC00173	long intergenic non-protein coding RNA 173	1.409	3.158
215224_at	SNORA21	small nucleolar RNA, H/ACA box 21	1.409	4.898
232293_at	LCORL	ligand dependent nuclear receptor corepressor like	1.406	3.796
202813_at	TARBP1	TAR (HIV-1) RNA binding protein 1	1.406	5.443
232338_at	ZNF431	zinc finger protein 431	1.405	4.116
223504_at	DNAJC27	DnaJ heat shock protein family (Hsp40) member C27	1.404	3.365
231992_x_at	GS1-124K5.11	RAB guanine nucleotide exchange factor 1 pseudogene	1.403	5.563
228927_at	ZNF397	zinc finger protein 397	1.403	5.9
236608_at	ADGRF3	adhesion G protein-coupled receptor F3	1.402	3.403
1564906_at	SNHG4///MATR3	small nucleolar RNA host gene 4///matrin 3	1.402	2.841
219947_at	CLEC4A	C-type lectin domain family 4 member A	1.401	2.062
223513_at	CENPJ	centromere protein J	1.4	4.236
237346_at	TGDS	TDP-glucose 4,6-dehydratase	1.4	3.74
219670_at	BEND5	BEN domain containing 5	1.399	2.912
242201_at	PMS2P5	PMS1 homolog 2, mismatch repair system component pseudogene 5	1.399	3.901
213737_x_at	GOLGA8N	golgin A8 family member N	1.397	3.989
1558588_at	LOC100996741///LINC00869	uncharacterized LOC100996741///long intergenic non-protein coding RNA 869	1.396	4.549
242292_at	FAM226B///FAM226A	family with sequence similarity 226 member B (non-protein coding)///family with sequence similarity 226 member A (non-protein coding)	1.394	3.855
228040_at	GLIDR	glioblastoma down-regulated RNA	1.393	4.197
1562255_at	SYTL3	synaptotagmin like 3	1.393	4.27
226310_at	RICTOR	RPTOR independent companion of MTOR complex 2	1.392	4.273
213022_s_at	UTRN	utrophin	1.39	3.776
232440_at	ZDHHC13	zinc finger DHHC-type containing 13	1.39	4.674
219980_at	ABHD18	abhydrolase domain containing 18	1.389	4.421
202206_at	ARL4C	ADP ribosylation factor like GTPase 4C	1.389	2.702
218456_at	CAPRIN2	caprin family member 2	1.386	4.458
221971_x_at	LOC101060581///AGAP5///AGAP9///AGAP12P///BMS1P5///AGAP11///AGAP4	arf-GAP with GTPase, ANK repeat and PH domain-containing protein 5-like///ArfGAP with GTPase domain, ankyrin repeat and PH domain 5///ArfGAP with GTPase domain, ankyrin repeat and PH domain 9///ArfGAP with GTPase domain, ankyrin repeat and PH domain 12, pseudogene///BMS1, ribosome biogenesis factor pseudogene 5///ArfGAP with GTPase domain, ankyrin repeat and PH domain 11///ArfGAP with GTPase doma…	1.384	5.007
220617_s_at	ZNF532	zinc finger protein 532	1.383	2.75
1557394_at	DLGAP4	DLG associated protein 4	1.379	4.563
203301_s_at	DMTF1	cyclin D binding myb like transcription factor 1	1.377	5.589
216288_at	CYSLTR1	cysteinyl leukotriene receptor 1	1.376	4.593
228245_s_at	LOC100509445///LOC728715///OVOS///OVOS2	uncharacterized LOC100509445///ovostatin homolog 2///ovostatin///ovostatin 2	1.376	3.015
229870_at	LOC644656	uncharacterized LOC644656	1.376	4.912
235587_at	PAXIP1-AS1	PAXIP1 antisense RNA 1 (head to head)	1.375	4.555
214984_at	LOC101060604///SMG1P3///SLC7A5P1	putative L-type amino acid transporter 1-like protein IMAA///SMG1P3, nonsense mediated mRNA decay associated PI3K related kinase pseudogene 3///solute carrier family 7 member 5 pseudogene 1	1.373	4.626
1570130_at	SPATS2	spermatogenesis associated serine rich 2	1.373	2.68
207263_x_at	VEZT	vezatin, adherens junctions transmembrane protein	1.373	4.382
228566_at	RPRD1A	regulation of nuclear pre-mRNA domain containing 1A	1.372	4.213
228335_at	CLDN11	claudin 11	1.369	2.454
218197_s_at	OXR1	oxidation resistance 1	1.367	4.134
230516_at	MALSU1	mitochondrial assembly of ribosomal large subunit 1	1.366	3.404
238825_at	ACRC	acidic repeat containing	1.364	5.172
222478_at	VPS36	vacuolar protein sorting 36 homolog	1.363	5.186
214722_at	NOTCH2NL	notch 2 N-terminal like	1.361	3.971
219757_s_at	TMEM260	transmembrane protein 260	1.36	5.439
228282_at	MFSD8	major facilitator superfamily domain containing 8	1.359	3.881
207130_at	ZMYND8	zinc finger MYND-type containing 8	1.359	4.664
1556006_s_at	CSNK1A1	casein kinase 1 alpha 1	1.358	5.526
241727_x_at	DHFR2	dihydrofolate reductase 2	1.358	4.632
1560445_x_at	ARHGEF1	Rho guanine nucleotide exchange factor 1	1.356	5.249
217538_at	SGSM2	small G protein signaling modulator 2	1.355	4.068
1555259_at	ZAK	sterile alpha motif and leucine zipper containing kinase AZK	1.355	3.142
203791_at	DMXL1	Dmx like 1	1.354	3.597
219906_at	EBLN2	endogenous Bornavirus-like nucleoprotein 2	1.354	5.155
222413_s_at	KMT2C	lysine methyltransferase 2C	1.354	6.033
223643_at	CRYGS	crystallin gamma S	1.353	3.033
220814_at	SLC30A6	solute carrier family 30 member 6	1.353	4.668
1557246_at	KIDINS220	kinase D-interacting substrate 220kDa	1.349	4.749
1558816_at	ZNF664	zinc finger protein 664	1.347	4.005
230678_at	RGS5	regulator of G-protein signaling 5	1.346	3.95
1559722_at	C9orf3	chromosome 9 open reading frame 3	1.344	4.977
229371_at	SLC20A2	solute carrier family 20 member 2	1.344	4.061
209285_s_at	FAM208A	family with sequence similarity 208 member A	1.343	3.898
236368_at	KIAA0368	KIAA0368	1.343	3.776
215383_x_at	SPG21	spastic paraplegia 21 (autosomal recessive, Mast syndrome)	1.343	3.861
201218_at	CTBP2	C-terminal binding protein 2	1.342	2.253
213046_at	PABPN1	poly(A) binding protein nuclear 1	1.341	4.074
212592_at	JCHAIN	joining chain of multimeric IgA and IgM	1.338	3.218
220338_at	RALGPS2	Ral GEF with PH domain and SH3 binding motif 2	1.338	4.632
208120_x_at	FKSG49	FKSG49	1.337	5.204
210969_at	PKN2	protein kinase N2	1.337	3.029
219392_x_at	PRR11	proline rich 11	1.337	5.658
1556381_at	NAA15	N(alpha)-acetyltransferase 15, NatA auxiliary subunit	1.336	5.61
244623_at	KCNQ5	potassium voltage-gated channel subfamily Q member 5	1.335	2.409
228023_x_at	ACTG1P4///RNPC3///AMY2B	actin gamma 1 pseudogene 4///RNA binding region (RNP1, RRM) containing 3///amylase, alpha 2B (pancreatic)	1.333	5.738
1559658_at	KATNBL1	katanin regulatory subunit B1 like 1	1.333	3.78
230395_at	METTL9	methyltransferase like 9	1.331	3.69
214833_at	TMEM63A	transmembrane protein 63A	1.331	3.374
1558515_at	FTX	FTX transcript, XIST regulator (non-protein coding)	1.33	3.785
1559044_at	EXOSC1	exosome component 1	1.328	5.558
1556257_at	LOC645513	septin 7 pseudogene	1.328	4.35
225724_at	PSMA3-AS1	PSMA3 antisense RNA 1	1.327	5
205739_x_at	ZNF107	zinc finger protein 107	1.327	3.909
225814_at	XRN1	5'-3' exoribonuclease 1	1.324	2.913
227311_at	SNX25	sorting nexin 25	1.323	5.224
208137_x_at	ZNF611	zinc finger protein 611	1.323	5.377
240230_s_at	AGAP9	ArfGAP with GTPase domain, ankyrin repeat and PH domain 9	1.322	3.897
224701_at	PARP14	poly(ADP-ribose) polymerase family member 14	1.321	4.758
228316_at	CLHC1	clathrin heavy chain linker domain containing 1	1.32	3.412
220148_at	ALDH8A1	aldehyde dehydrogenase 8 family member A1	1.319	3.399
1569484_s_at	MDN1	midasin AAA ATPase 1	1.319	5.596
219683_at	FZD3	frizzled class receptor 3	1.318	3.613
226687_at	PRPF40A	pre-mRNA processing factor 40 homolog A	1.318	6.083
214870_x_at	LOC102724993///LOC101930075///NPIPA8///NPIPA7///NPIPA5///NPIPA2///NPIPA3///PKD1P1///NPIPA1	nuclear pore complex-interacting protein family member A7-like///polycystin-1-like///nuclear pore complex interacting protein family member A8///nuclear pore complex interacting protein family member A7///nuclear pore complex interacting protein family member A5///nuclear pore complex interacting protein family member A2///nuclear pore complex interacting protein family member A3///polycystin 1, …	1.317	5.627
1569482_at	TNRC6C	trinucleotide repeat containing 6C	1.317	4.072
232436_at	ZNF274	zinc finger protein 274	1.317	4.169
228097_at	MYLIP	myosin regulatory light chain interacting protein	1.316	3.764
212176_at	PNISR	PNN interacting serine and arginine rich protein	1.316	6.429
225912_at	TP53INP1	tumor protein p53 inducible nuclear protein 1	1.316	4.55
234445_at	ZNRD1ASP	zinc ribbon domain containing 1 antisense, pseudogene	1.316	3.345
243224_at	LOC100506302	uncharacterized LOC100506302	1.315	5.543
238069_at	LOC101927365	uncharacterized LOC101927365	1.315	4.32
213326_at	VAMP1	vesicle associated membrane protein 1	1.315	3.701
219505_at	CECR1	cat eye syndrome chromosome region, candidate 1	1.314	2.02
203132_at	RB1	RB transcriptional corepressor 1	1.314	2.572
218396_at	VPS13C	vacuolar protein sorting 13 homolog C	1.314	4.473
242539_at	DIS3L2	DIS3 like 3'-5' exoribonuclease 2	1.313	4.116
218450_at	HEBP1	heme binding protein 1	1.312	2.92
216110_x_at	LOC105373738	uncharacterized LOC105373738	1.312	4.866
211947_s_at	PRRC2C	proline rich coiled-coil 2C	1.306	3.414
201924_at	AFF1	AF4/FMR2 family member 1	1.304	5.158
1558792_x_at	AP2A1	adaptor related protein complex 2 alpha 1 subunit	1.304	5.793
203255_at	FBXO11	F-box protein 11	1.303	5.642
210203_at	CNOT4	CCR4-NOT transcription complex subunit 4	1.302	4.413
1565628_at	LRRK1	leucine rich repeat kinase 1	1.301	3.762
223697_x_at	C9orf64	chromosome 9 open reading frame 64	1.299	5.049
1559528_at	LOC100129917	uncharacterized LOC100129917	1.299	3.968
239212_at	LTV1	LTV1 ribosome biogenesis factor	1.298	4.903
215040_at	RNASEH2B	ribonuclease H2 subunit B	1.296	3.202
205434_s_at	AAK1	AP2 associated kinase 1	1.295	3.9
1558135_at	TAF11	TATA-box binding protein associated factor 11	1.295	5.261
1558346_at	COX17	COX17, cytochrome c oxidase copper chaperone	1.294	3.382
228318_s_at	CRIPAK	cysteine rich PAK1 inhibitor	1.294	3.174
228930_at	SCARNA15	small Cajal body-specific RNA 15	1.294	4.617
227208_at	CCDC84	coiled-coil domain containing 84	1.292	4.562
225175_s_at	SLC44A2	solute carrier family 44 member 2	1.292	2.405
1555476_at	IREB2	iron responsive element binding protein 2	1.291	4.179
238788_at	PHBP19	prohibitin pseudogene 19	1.291	4.213
1554260_a_at	FRYL	FRY like transcription coactivator	1.289	3.917
221897_at	TRIM52	tripartite motif containing 52	1.288	3.741
1563229_at	MIR15A///DLEU2	microRNA 15a///deleted in lymphocytic leukemia 2 (non-protein coding)	1.287	4.346
223662_x_at	DDX59	DEAD-box helicase 59	1.286	3.87
226603_at	SAMD9L	sterile alpha motif domain containing 9 like	1.286	2.268
228771_at	GRK3	G protein-coupled receptor kinase 3	1.285	3.402
238807_at	GAPDHP62///ANKRD46	glyceraldehyde 3 phosphate dehydrogenase pseudogene 62///ankyrin repeat domain 46	1.284	4.8
206834_at	HBD	hemoglobin subunit delta	1.284	2.808
242669_at	UFM1	ubiquitin fold modifier 1	1.284	4.5
232063_x_at	FARSB	phenylalanyl-tRNA synthetase beta subunit	1.283	2.836
224673_at	LENG8	leukocyte receptor cluster member 8	1.283	3.419
1568763_s_at	LOC102724884///LOC728613///PDCD6	uncharacterized LOC102724884///programmed cell death 6 pseudogene///programmed cell death 6	1.281	4.825
219814_at	MBNL3	muscleblind like splicing regulator 3	1.281	2.778
207917_at	NUDT13	nudix hydrolase 13	1.281	5.126
1553906_s_at	FGD2	FYVE, RhoGEF and PH domain containing 2	1.28	3.335
1556051_a_at	BICD1	BICD cargo adaptor 1	1.279	2.892
1569053_at	AP3M2	adaptor related protein complex 3 mu 2 subunit	1.278	5.663
243829_at	BRAF	B-Raf proto-oncogene, serine/threonine kinase	1.278	3.07
207231_at	DZIP3	DAZ interacting zinc finger protein 3	1.278	3.15
242608_x_at	FAM161B	family with sequence similarity 161 member B	1.277	5.222
229393_at	L3MBTL3	l(3)mbt-like 3 (Drosophila)	1.277	5.625
218149_s_at	ZNF395	zinc finger protein 395	1.277	4.144
228532_at	C1orf162	chromosome 1 open reading frame 162	1.276	3.427
240574_at	DNAJC3-AS1	DNAJC3 antisense RNA 1 (head to head)	1.275	3.597
1566889_at	THADA	THADA, armadillo repeat containing	1.275	4.241
213267_at	DOPEY1	dopey family member 1	1.274	2.57
208694_at	PRKDC	protein kinase, DNA-activated, catalytic polypeptide	1.274	5.192
237469_at	TOP2A	topoisomerase (DNA) II alpha	1.274	4.999
1557436_at	XKR6	XK related 6	1.274	4.016
232071_at	MRPL19	mitochondrial ribosomal protein L19	1.273	3.511
230637_at	SFXN4	sideroflexin 4	1.273	5.244
212020_s_at	MKI67	marker of proliferation Ki-67	1.271	3.86
243801_x_at	MRPL30	mitochondrial ribosomal protein L30	1.271	3.587
235230_at	PLCXD2	phosphatidylinositol specific phospholipase C X domain containing 2	1.271	2.697
214747_at	ZBED4	zinc finger BED-type containing 4	1.271	4.863
235535_x_at	FRG1KP///LOC101930531///LOC101930278///FRG1CP///LOC100134091///FRG1BP///FRG1	FSHD region gene 1 family member K, pseudogene///uncharacterized LOC101930531///uncharacterized LOC101930278///FSHD region gene 1 family member C, pseudogene///protein FRG1B-like///FSHD region gene 1 family member B, pseudogene///FSHD region gene 1	1.27	3.707
226065_at	PRICKLE1	prickle planar cell polarity protein 1	1.27	2.505
204142_at	ENOSF1	enolase superfamily member 1	1.268	4.628
1558740_s_at	LOC105369662	uncharacterized LOC105369662	1.268	3.759
223980_s_at	SP110	SP110 nuclear body protein	1.267	4.608
202940_at	WNK1	WNK lysine deficient protein kinase 1	1.267	4.751
1562364_at	GVINP1	GTPase, very large interferon inducible pseudogene 1	1.266	3.641
203029_s_at	PTPRN2	protein tyrosine phosphatase, receptor type N2	1.266	2.309
234268_at	SLC2A13	solute carrier family 2 member 13	1.266	5.588
212000_at	SUGP2	SURP and G-patch domain containing 2	1.264	5.792
232630_at	APIP	APAF1 interacting protein	1.263	3.952
219678_x_at	DCLRE1C	DNA cross-link repair 1C	1.262	5.907
210268_at	NFX1	nuclear transcription factor, X-box binding 1	1.262	5.584
210742_at	CDC14A	cell division cycle 14A	1.261	5.298
227627_at	C8orf44-SGK3///SGK3	C8orf44-SGK3 readthrough///serum/glucocorticoid regulated kinase family member 3	1.26	2.537
228007_at	CEP85L	centrosomal protein 85 like	1.257	4.701
228506_at	NSMCE4A	NSE4 homolog A, SMC5-SMC6 complex component	1.254	4.738
226435_at	PAPLN	papilin, proteoglycan like sulfated glycoprotein	1.254	2.295
226429_at	GPALPP1	GPALPP motifs containing 1	1.253	3.484
221103_s_at	CFAP44	cilia and flagella associated protein 44	1.252	2.777
229007_at	LOC283788	FSHD region gene 1 pseudogene	1.252	2.997
228891_at	SEMA4D	semaphorin 4D	1.251	5.559
229026_at	CDC42SE2	CDC42 small effector 2	1.249	2.355
235305_s_at	ECHDC2	enoyl-CoA hydratase domain containing 2	1.249	5.602
239247_at	CD99P1	CD99 molecule pseudogene 1	1.248	3.689
206513_at	AIM2	absent in melanoma 2	1.246	2.127
220219_s_at	LRRC37A2///LRRC37A3///LRRC37A4P///LRRC37A	leucine rich repeat containing 37 member A2///leucine rich repeat containing 37 member A3///leucine rich repeat containing 37 member A4, pseudogene///leucine rich repeat containing 37A	1.246	3.794
202425_x_at	PPP3CA	protein phosphatase 3 catalytic subunit alpha	1.244	2.59
222786_at	CHST12	carbohydrate (chondroitin 4) sulfotransferase 12	1.243	2.047
215659_at	GSDMB	gasdermin B	1.243	4.181
1569354_at	NSUN6	NOP2/Sun RNA methyltransferase family member 6	1.242	4.163
217593_at	ZSCAN18	zinc finger and SCAN domain containing 18	1.241	2.943
225283_at	ARRDC4	arrestin domain containing 4	1.24	3.526
235009_at	BOD1L1	biorientation of chromosomes in cell division 1 like 1	1.24	3.787
227755_at	ERN1	endoplasmic reticulum to nucleus signaling 1	1.239	2.827
232758_s_at	LOC101928291	uncharacterized LOC101928291	1.236	4.916
205372_at	PLAG1	PLAG1 zinc finger	1.236	4.69
232964_at	SPDYE2B///SPDYE6///SPDYE5///SPDYE2///SPDYE1	speedy/RINGO cell cycle regulator family member E2B///speedy/RINGO cell cycle regulator family member E6///speedy/RINGO cell cycle regulator family member E5///speedy/RINGO cell cycle regulator family member E2///speedy/RINGO cell cycle regulator family member E1	1.235	3.181
209265_s_at	METTL3	methyltransferase like 3	1.233	4.91
242456_at	MRE11A	MRE11 homolog A, double strand break repair nuclease	1.233	2.528
240846_at	PCBD2	pterin-4 alpha-carbinolamine dehydratase 2	1.233	4.565
1556323_at	CELF2	CUGBP, Elav-like family member 2	1.232	3.165
218397_at	FANCL	Fanconi anemia complementation group L	1.232	4.93
213459_at	RPL37A	ribosomal protein L37a	1.232	3.21
226208_at	ZSWIM6	zinc finger SWIM-type containing 6	1.23	2.015
1561346_at	LOC101927166	uncharacterized LOC101927166	1.229	4.628
202519_at	MLXIP	MLX interacting protein	1.229	5.29
232670_at	LOC149401	uncharacterized LOC149401	1.227	4.373
229402_at	SAMD13	sterile alpha motif domain containing 13	1.227	3.547
203568_s_at	TRIM38	tripartite motif containing 38	1.226	4.685
228630_at	ZNF84	zinc finger protein 84	1.226	4.383
219918_s_at	ASPM	abnormal spindle microtubule assembly	1.225	3.851
228528_at	MIR29C///MIR29B2	microRNA 29c///microRNA 29b-2	1.225	4.247
223724_s_at	STAG3L2///STAG3L3///STAG3L1	stromal antigen 3-like 2 (pseudogene)///stromal antigen 3-like 3 (pseudogene)///stromal antigen 3-like 1 (pseudogene)	1.225	4.18
1552733_at	KLHDC1	kelch domain containing 1	1.224	3.372
235987_at	PRKXP1	protein kinase, X-linked, pseudogene 1	1.224	2.059
217763_s_at	RAB31	RAB31, member RAS oncogene family	1.224	2.288
204761_at	USP6NL	USP6 N-terminal like	1.224	3.195
233229_at	SCFD1	sec1 family domain containing 1	1.223	4.458
207522_s_at	ATP2A3	ATPase sarcoplasmic/endoplasmic reticulum Ca2+ transporting 3	1.222	3.242
204236_at	FLI1	Fli-1 proto-oncogene, ETS transcription factor	1.222	2.82
235410_at	NPHP3	nephronophthisis 3 (adolescent)	1.222	3.008
205370_x_at	DBT	dihydrolipoamide branched chain transacylase E2	1.22	5.572
214980_at	UBE3A	ubiquitin protein ligase E3A	1.219	3.708
205510_s_at	FLJ10038	uncharacterized protein FLJ10038	1.218	4.559
1555469_a_at	CLASP2	cytoplasmic linker associated protein 2	1.217	5.851
240718_at	LRMP	lymphoid restricted membrane protein	1.216	3.295
217667_at	SEC14L1P1	SEC14 like 1 pseudogene 1	1.216	5.151
213261_at	TRANK1	tetratricopeptide repeat and ankyrin repeat containing 1	1.214	2.706
1563051_at	OSBP	oxysterol binding protein	1.213	4.869
241793_at	MSS51	MSS51 mitochondrial translational activator	1.212	5.444
1568857_a_at	NBR1	NBR1, autophagy cargo receptor	1.212	3.7
211742_s_at	EVI2B	ecotropic viral integration site 2B	1.211	2.474
224451_x_at	ARHGAP9	Rho GTPase activating protein 9	1.21	3.648
232156_at	AP5M1	adaptor related protein complex 5 mu 1 subunit	1.208	2.668
215618_at	RSU1	Ras suppressor protein 1	1.207	4.273
227049_at	ZADH2	zinc binding alcohol dehydrogenase domain containing 2	1.206	4.07
220085_at	HELLS	helicase, lymphoid-specific	1.205	4.621
219691_at	SAMD9	sterile alpha motif domain containing 9	1.205	2.057
208322_s_at	ST3GAL1	ST3 beta-galactoside alpha-2,3-sialyltransferase 1	1.205	2.771
1554565_x_at	SPPL3	signal peptide peptidase like 3	1.203	3.652
1566191_at	SUZ12	SUZ12 polycomb repressive complex 2 subunit	1.203	4.909
1556033_at	LINC01138	long intergenic non-protein coding RNA 1138	1.202	4.061
229615_at	SLX4IP	SLX4 interacting protein	1.202	4.254
214712_at	SNX29P2	sorting nexin 29 pseudogene 2	1.202	4.21
222286_at	SNAPC3	small nuclear RNA activating complex polypeptide 3	1.201	3.674
230836_at	ST8SIA4	ST8 alpha-N-acetyl-neuraminide alpha-2,8-sialyltransferase 4	1.201	2.626
216310_at	TAOK1	TAO kinase 1	1.201	4.618
217610_at	SPDYE2	speedy/RINGO cell cycle regulator family member E2	1.2	2.389
221740_x_at	LRRC37A2	leucine rich repeat containing 37 member A2	1.198	3.461
218850_s_at	LIMD1	LIM domains containing 1	1.196	3.719
242851_at	MFSD4B	major facilitator superfamily domain containing 4B	1.195	3.707
233436_at	MTBP	MDM2 binding protein	1.195	3.846
202741_at	PRKACB	protein kinase cAMP-activated catalytic subunit beta	1.195	3.252
1559500_at	VPS8	VPS8, CORVET complex subunit	1.195	2.968
204859_s_at	APAF1	apoptotic peptidase activating factor 1	1.194	3.425
223619_x_at	PECR	peroxisomal trans-2-enoyl-CoA reductase	1.194	5.391
1558365_at	PGK1	phosphoglycerate kinase 1	1.194	2.655
222761_at	BIVM	basic, immunoglobulin-like variable motif containing	1.193	3.618
227517_s_at	SNORD77///SNORD76///SNORD74///GAS5///SNORD44///SNORD47///SNORD80///SNORD79///SNORD81	small nucleolar RNA, C/D box 77///small nucleolar RNA, C/D box 76///small nucleolar RNA, C/D box 74///growth arrest specific 5 (non-protein coding)///small nucleolar RNA, C/D box 44///small nucleolar RNA, C/D box 47///small nucleolar RNA, C/D box 80///small nucleolar RNA, C/D box 79///small nucleolar RNA, C/D box 81	1.193	3.724
228658_at	MIAT	myocardial infarction associated transcript (non-protein coding)	1.192	2.245
203883_s_at	RAB11FIP2	RAB11 family interacting protein 2	1.192	4.932
210962_s_at	AKAP9	A-kinase anchoring protein 9	1.191	4.347
206500_s_at	MIS18BP1	MIS18 binding protein 1	1.19	4.111
233912_x_at	ELMOD2	ELMO domain containing 2	1.188	2.329
1555247_a_at	RAPGEF6	Rap guanine nucleotide exchange factor 6	1.188	4.156
1562368_at	CARD11	caspase recruitment domain family member 11	1.187	3.804
244526_at	RASGRP3	RAS guanyl releasing protein 3	1.184	2.509
228937_at	LACC1	laccase domain containing 1	1.182	2.497
232038_at	TBC1D32	TBC1 domain family member 32	1.181	2.483
219378_at	NAA16	N(alpha)-acetyltransferase 16, NatA auxiliary subunit	1.18	5.15
217534_at	FAM49B	family with sequence similarity 49 member B	1.179	4.111
1553955_at	PPP1R21	protein phosphatase 1 regulatory subunit 21	1.179	4.706
206661_at	DBF4B	DBF4 zinc finger B	1.176	5.016
228308_at	FKBP11	FK506 binding protein 11	1.175	3.971
201964_at	SETX	senataxin	1.175	4.298
221501_x_at	LOC101930075///NPIPA8///NPIPA7///NPIPA5///NPIPA2///NPIPA3///PKD1P1///NPIPA1	polycystin-1-like///nuclear pore complex interacting protein family member A8///nuclear pore complex interacting protein family member A7///nuclear pore complex interacting protein family member A5///nuclear pore complex interacting protein family member A2///nuclear pore complex interacting protein family member A3///polycystin 1, transient receptor potential channel interacting pseudogene 1///n…	1.174	4.847
202600_s_at	NRIP1	nuclear receptor interacting protein 1	1.173	1.992
219290_x_at	DAPP1	dual adaptor of phosphotyrosine and 3-phosphoinositides 1	1.171	4.124
244871_s_at	USP32	ubiquitin specific peptidase 32	1.171	3.399
207236_at	ZNF345	zinc finger protein 345	1.171	2.534
1561578_s_at	SLC25A53	solute carrier family 25 member 53	1.17	2.873
1554154_at	GDAP2	ganglioside induced differentiation associated protein 2	1.169	4.714
1559042_at	NDUFB6	NADH:ubiquinone oxidoreductase subunit B6	1.169	3.508
218659_at	ASXL2	additional sex combs like 2, transcriptional regulator	1.168	3.998
225502_at	DOCK8	dedicator of cytokinesis 8	1.167	3.173
1556072_at	LINC00528	long intergenic non-protein coding RNA 528	1.166	4.14
203640_at	MBNL2	muscleblind like splicing regulator 2	1.166	2.139
240166_x_at	TRMT10B	tRNA methyltransferase 10B	1.166	4.533
207598_x_at	XRCC2	X-ray repair cross complementing 2	1.166	4.223
215529_x_at	DIP2A	disco interacting protein 2 homolog A	1.165	4.735
242916_at	CNTRL	centriolin	1.164	4.531
228084_at	PLA2G12A	phospholipase A2 group XIIA	1.163	2.228
223685_s_at	LOC101928524///PRPF18	uncharacterized LOC101928524///pre-mRNA processing factor 18	1.162	3.686
223595_at	TMEM133	transmembrane protein 133	1.162	2.521
1561190_at	CDKL3	cyclin dependent kinase like 3	1.161	5.353
240528_s_at	EXOC4	exocyst complex component 4	1.161	3.917
239072_at	EMB	embigin	1.16	2.187
205731_s_at	NCOA2	nuclear receptor coactivator 2	1.16	3.151
202738_s_at	PHKB	phosphorylase kinase regulatory subunit beta	1.16	3.961
217823_s_at	UBE2J1	ubiquitin conjugating enzyme E2 J1	1.16	3.027
1562836_at	DDX6	DEAD-box helicase 6	1.159	2.454
229665_at	CSTF3	cleavage stimulation factor subunit 3	1.157	5.153
207229_at	KLRA1P	killer cell lectin like receptor A1, pseudogene	1.156	4.189
227622_at	PCF11	PCF11 cleavage and polyadenylation factor subunit	1.155	4.5
232864_s_at	AFF4	AF4/FMR2 family member 4	1.154	3.137
236006_s_at	AKAP10	A-kinase anchoring protein 10	1.154	4.223
229843_at	RMDN1	regulator of microtubule dynamics 1	1.154	1.989
1559022_at	EFCAB14	EF-hand calcium binding domain 14	1.153	4.645
212704_at	ZCCHC11	zinc finger CCHC-type containing 11	1.153	4.6
228749_at	ZDBF2	zinc finger DBF-type containing 2	1.153	3.458
235762_at	TAS2R14	taste 2 receptor member 14	1.152	3.405
212366_at	ZNF292	zinc finger protein 292	1.152	4.076
228454_at	LCOR	ligand dependent nuclear receptor corepressor	1.151	3.722
225321_s_at	MIR6840///STAG3L5P-PVRIG2P-PILRB///PILRB	microRNA 6840///STAG3L5P-PVRIG2P-PILRB readthrough///paired immunoglobin-like type 2 receptor beta	1.151	4.238
1569194_at	ZNF789	zinc finger protein 789	1.151	3.992
1553425_at	CFAP57	cilia and flagella associated protein 57	1.15	3.096
243608_at	COG2	component of oligomeric golgi complex 2	1.15	3.816
226265_at	QSER1	glutamine and serine rich 1	1.15	4.78
218155_x_at	TSR1	TSR1, ribosome maturation factor	1.15	5.314
223781_x_at	ADH4	alcohol dehydrogenase 4 (class II), pi polypeptide	1.149	4.542
223658_at	KCNK6	potassium two pore domain channel subfamily K member 6	1.149	2.246
228770_at	GPR146	G protein-coupled receptor 146	1.147	2.118
210686_x_at	SLC25A16	solute carrier family 25 member 16	1.147	5.305
214743_at	CUX1	cut like homeobox 1	1.146	4.804
235540_at	GNRH1	gonadotropin releasing hormone 1	1.146	2.694
1558747_at	SMCHD1	structural maintenance of chromosomes flexible hinge domain containing 1	1.146	3.723
220059_at	STAP1	signal transducing adaptor family member 1	1.145	2.221
232395_x_at	AGBL3	ATP/GTP binding protein like 3	1.144	3.992
223846_at	AZI2	5-azacytidine induced 2	1.142	3.521
219990_at	E2F8	E2F transcription factor 8	1.142	2.767
226733_at	PFKFB2	6-phosphofructo-2-kinase/fructose-2,6-biphosphatase 2	1.141	2.659
235152_at	LOC101927204	uncharacterized LOC101927204	1.14	3.175
214862_x_at	TET1	tet methylcytosine dioxygenase 1	1.14	3.741
1558996_at	FOXP1	forkhead box P1	1.137	2.526
220459_at	MCM3AP-AS1	MCM3AP antisense RNA 1	1.137	3.664
241374_at	TMEM39A	transmembrane protein 39A	1.137	4.064
232600_at	ANKRD42	ankyrin repeat domain 42	1.136	2.126
204786_s_at	IFNAR2	interferon alpha and beta receptor subunit 2	1.136	3.912
210765_at	CSE1L	chromosome segregation 1 like	1.135	3.285
232175_at	ARF1	ADP ribosylation factor 1	1.134	4.902
208859_s_at	ATRX	ATRX, chromatin remodeler	1.134	4.04
1552318_at	GIMAP1	GTPase, IMAP family member 1	1.134	2.12
232552_at	DAAM1	dishevelled associated activator of morphogenesis 1	1.133	3.49
220342_x_at	EDEM3	ER degradation enhancing alpha-mannosidase like protein 3	1.133	3.168
204484_at	PIK3C2B	phosphatidylinositol-4-phosphate 3-kinase catalytic subunit type 2 beta	1.132	2.938
216361_s_at	KAT6A	lysine acetyltransferase 6A	1.13	3.483
231049_at	LMO2	LIM domain only 2	1.13	2.222
202499_s_at	SLC2A3	solute carrier family 2 member 3	1.13	2.459
232140_at	FRG1HP	FSHD region gene 1 family member H, pseudogene	1.129	4.273
231183_s_at	JAG1	jagged 1	1.129	3.757
244404_at	STXBP4	syntaxin binding protein 4	1.128	2.919
242393_x_at	AGAP6	ArfGAP with GTPase domain, ankyrin repeat and PH domain 6	1.125	3.49
211600_at	PTPRO	protein tyrosine phosphatase, receptor type O	1.125	3.392
1568799_at	SLC16A1-AS1	SLC16A1 antisense RNA 1	1.125	4.971
241623_at	PTPN2	protein tyrosine phosphatase, non-receptor type 2	1.124	3.213
1560306_at	SSH2	slingshot protein phosphatase 2	1.124	2.981
1555888_at	UBR5-AS1	UBR5 antisense RNA 1	1.124	3.353
226771_at	ATP8B2	ATPase phospholipid transporting 8B2	1.123	3.803
224766_at	LOC100506548///RPL37	uncharacterized LOC100506548///ribosomal protein L37	1.123	3.148
227979_at	RBM4	RNA binding motif protein 4	1.123	3.717
1554479_a_at	CARD8	caspase recruitment domain family member 8	1.122	2.882
1558185_at	LOC100507616///CLLU1	uncharacterized LOC100507616///chronic lymphocytic leukemia up-regulated 1	1.122	3.307
243834_at	TNRC6A	trinucleotide repeat containing 6A	1.122	3.028
217282_at	MAN1A2	mannosidase alpha class 1A member 2	1.121	4.761
1569189_at	TTC9C	tetratricopeptide repeat domain 9C	1.121	3.425
1554670_at	GGA1	golgi associated, gamma adaptin ear containing, ARF binding protein 1	1.12	3.363
242163_at	THRAP3	thyroid hormone receptor associated protein 3	1.12	2.145
232291_at	MIR17HG///MIR92A1///MIR20A///MIR19B1///MIR19A///MIR18A///MIR17	miR-17-92a-1 cluster host gene///microRNA 92a-1///microRNA 20a///microRNA 19b-1///microRNA 19a///microRNA 18a///microRNA 17	1.119	3.399
210077_s_at	SRSF5	serine and arginine rich splicing factor 5	1.119	3.72
241402_at	TSEN54	tRNA splicing endonuclease subunit 54	1.119	3.281
231864_at	ZNF33A	zinc finger protein 33A	1.119	3.511
230213_at	C19orf43	chromosome 19 open reading frame 43	1.118	3.381
1568680_s_at	YTHDC2	YTH domain containing 2	1.118	4.257
205760_s_at	OGG1	8-oxoguanine DNA glycosylase	1.115	3.313
207394_at	ZNF137P	zinc finger protein 137, pseudogene	1.113	4.663
238596_at	FRA10AC1	fragile site, folic acid type, rare, fra(10)(q23.3) or fra(10)(q24.2) candidate 1	1.112	4.279
224372_at	ND4	NADH dehydrogenase, subunit 4 (complex I)	1.112	4.608
219833_s_at	EFHC1	EF-hand domain containing 1	1.111	3.857
219269_at	HMBOX1	homeobox containing 1	1.111	2.041
238220_at	KDM6A	lysine demethylase 6A	1.111	4.683
218603_at	HECA	hdc homolog, cell cycle regulator	1.11	2.58
208608_s_at	SNTB1	syntrophin beta 1	1.11	2.64
221645_s_at	ZNF83	zinc finger protein 83	1.11	2.416
228816_at	ATP6AP1L	ATPase H+ transporting accessory protein 1 like	1.109	2.139
242195_x_at	NUMBL	NUMB like, endocytic adaptor protein	1.109	4.79
230058_at	SDCCAG3	serologically defined colon cancer antigen 3	1.109	2.546
1569110_x_at	LOC728613	programmed cell death 6 pseudogene	1.108	3.861
1556202_at	SRGAP2	SLIT-ROBO Rho GTPase activating protein 2	1.108	3.681
221191_at	STAG3L3	stromal antigen 3-like 3 (pseudogene)	1.108	3.786
214982_at	LOC101929240///SNRNP200	U5 small nuclear ribonucleoprotein 200 kDa helicase pseudogene///small nuclear ribonucleoprotein U5 subunit 200	1.107	3.281
210034_s_at	RPL5///SNORD21	ribosomal protein L5///small nucleolar RNA, C/D box 21	1.107	2.905
213164_at	SLC5A3	solute carrier family 5 member 3	1.107	3.544
203080_s_at	BAZ2B	bromodomain adjacent to zinc finger domain 2B	1.106	2.532
1559060_a_at	FNIP1	folliculin interacting protein 1	1.106	2.583
1562497_at	MKL2	MKL1/myocardin like 2	1.106	4.051
238530_at	NNT	nicotinamide nucleotide transhydrogenase	1.105	3.486
212195_at	IL6ST	interleukin 6 signal transducer	1.104	2.082
220169_at	TMEM156	transmembrane protein 156	1.104	2.237
222201_s_at	CASP8AP2	caspase 8 associated protein 2	1.103	4.681
201009_s_at	TXNIP	thioredoxin interacting protein	1.102	4.397
1554933_at	PSIP1	PC4 and SFRS1 interacting protein 1	1.101	3.373
228628_at	SRGAP2C	SLIT-ROBO Rho GTPase activating protein 2C	1.101	2.82
219644_at	CEP83	centrosomal protein 83	1.098	5.36
1558249_s_at	STX16	syntaxin 16	1.098	4.267
1552678_a_at	USP28	ubiquitin specific peptidase 28	1.098	2.639
242133_s_at	LOC654342///LOC645166	lymphocyte-specific protein 1 pseudogene///lymphocyte-specific protein 1 pseudogene	1.097	3.914
218380_at	LOC728392	uncharacterized LOC728392	1.096	2.693
226217_at	SLC30A7	solute carrier family 30 member 7	1.096	3.628
221833_at	LOC100507577///LONP2///SIAH1	uncharacterized LOC100507577///lon peptidase 2, peroxisomal///siah E3 ubiquitin protein ligase 1	1.095	2.508
1568780_at	LOC729732	uncharacterized LOC729732	1.095	2.99
1563498_s_at	SLC25A45	solute carrier family 25 member 45	1.095	3.465
213649_at	SRSF7	serine and arginine rich splicing factor 7	1.095	4.407
213269_at	ZNF248	zinc finger protein 248	1.094	4.281
235151_at	LOC283357	uncharacterized LOC283357	1.092	4.411
214683_s_at	CLK1	CDC like kinase 1	1.091	4.01
215358_x_at	ZNF37BP	zinc finger protein 37B, pseudogene	1.091	4.334
228693_at	CCDC50	coiled-coil domain containing 50	1.09	3.562
200685_at	SRSF11	serine and arginine rich splicing factor 11	1.09	2.796
233893_s_at	UVSSA	UV stimulated scaffold protein A	1.09	3.604
219313_at	GRAMD1C	GRAM domain containing 1C	1.089	2.15
238360_s_at	LINC00672	long intergenic non-protein coding RNA 672	1.089	2.53
228940_at	NDUFB4	NADH:ubiquinone oxidoreductase subunit B4	1.089	4.478
1558750_a_at	LOC100288637///ARHGAP11B	OTU deubiquitinase 7A pseudogene///Rho GTPase activating protein 11B	1.087	4.338
212651_at	RHOBTB1	Rho related BTB domain containing 1	1.085	3.335
1565935_at	ZGRF1	zinc finger GRF-type containing 1	1.085	2.972
219734_at	SIDT1	SID1 transmembrane family member 1	1.084	2.554
213243_at	VPS13B	vacuolar protein sorting 13 homolog B	1.084	3.743
1569815_x_at	STRN	striatin	1.083	3.889
213410_at	EDRF1	erythroid differentiation regulatory factor 1	1.082	2.605
218510_x_at	FAM134B	family with sequence similarity 134 member B	1.082	2.079
1557529_at	HECTD4	HECT domain E3 ubiquitin protein ligase 4	1.081	4.065
222252_x_at	UBQLN4	ubiquilin 4	1.081	4.373
216697_at	TRIO	trio Rho guanine nucleotide exchange factor	1.08	3.693
228331_at	C11orf31	chromosome 11 open reading frame 31	1.079	4.469
223423_at	GPR160	G protein-coupled receptor 160	1.078	2.129
1569003_at	VMP1	vacuole membrane protein 1	1.078	2.937
228280_at	ZC3HAV1L	zinc finger CCCH-type containing, antiviral 1 like	1.078	3.548
1553538_s_at	COX1	cytochrome c oxidase subunit I	1.077	3.32
243821_at	MRPS31	mitochondrial ribosomal protein S31	1.077	3.432
1563502_at	ZDHHC2	zinc finger DHHC-type containing 2	1.074	2.387
243316_x_at	VPS26A	VPS26, retromer complex component A	1.072	4.152
215671_at	PDE4B	phosphodiesterase 4B	1.071	3.684
229442_at	C18orf54	chromosome 18 open reading frame 54	1.07	2.861
1554116_s_at	PARP11	poly(ADP-ribose) polymerase family member 11	1.07	2.574
222281_s_at	LOC101929219///LOC100505650///C1orf186	uncharacterized LOC101929219///uncharacterized LOC100505650///chromosome 1 open reading frame 186	1.069	2.217
226441_at	MAP3K2	mitogen-activated protein kinase kinase kinase 2	1.069	2.727
213364_s_at	SNX1	sorting nexin 1	1.069	3.588
206364_at	KIF14	kinesin family member 14	1.068	3.004
219754_at	RBM41	RNA binding motif protein 41	1.068	4.496
207540_s_at	SYK	spleen associated tyrosine kinase	1.068	3.009
225444_at	UBN2	ubinuclein 2	1.068	4.959
217141_at	BTBD7	BTB domain containing 7	1.066	4.115
203297_s_at	JARID2	jumonji and AT-rich interaction domain containing 2	1.065	4.312
1570173_at	INTS7	integrator complex subunit 7	1.064	3.281
219353_at	NHLRC2	NHL repeat containing 2	1.064	2.775
221143_at	RPA4	replication protein A4	1.064	2.614
1558338_at	SEMA6A	semaphorin 6A	1.064	3.998
206652_at	ZMYM5	zinc finger MYM-type containing 5	1.064	2.959
201432_at	CAT	catalase	1.063	3.005
209539_at	ARHGEF6	Rac/Cdc42 guanine nucleotide exchange factor 6	1.062	3.779
213888_s_at	TRAF3IP3	TRAF3 interacting protein 3	1.062	2.267
210113_s_at	NLRP1	NLR family pyrin domain containing 1	1.061	2.311
202430_s_at	PLSCR1	phospholipid scramblase 1	1.061	2.981
236941_at	PRR14L	proline rich 14 like	1.061	5.099
1556043_a_at	TTN-AS1	TTN antisense RNA 1	1.06	2.421
238553_at	AGAP9///AGAP6///BMS1P5	ArfGAP with GTPase domain, ankyrin repeat and PH domain 9///ArfGAP with GTPase domain, ankyrin repeat and PH domain 6///BMS1, ribosome biogenesis factor pseudogene 5	1.059	2.022
209558_s_at	HIP1R	huntingtin interacting protein 1 related	1.059	3.101
228264_at	ACCS	1-aminocyclopropane-1-carboxylate synthase homolog (inactive)	1.058	2.385
229705_at	PIK3C3	phosphatidylinositol 3-kinase catalytic subunit type 3	1.058	3.172
212523_s_at	SPIDR	scaffolding protein involved in DNA repair	1.058	3.679
219870_at	ATF7IP2	activating transcription factor 7 interacting protein 2	1.057	3.261
202057_at	KPNA1	karyopherin subunit alpha 1	1.057	4.101
1561965_at	SNRPB2	small nuclear ribonucleoprotein polypeptide B2	1.057	3.057
240172_at	ERGIC2	ERGIC and golgi 2	1.056	3.512
1568795_at	LOC105373495	uncharacterized LOC105373495	1.056	3.025
1562546_at	LOC101930657	uncharacterized LOC101930657	1.055	2.917
1557630_s_at	LOC107984534	uncharacterized LOC107984534	1.055	4.335
205871_at	PLGLB1///PLGLB2	plasminogen-like B1///plasminogen-like B2	1.055	2.578
215754_at	SCARB2	scavenger receptor class B member 2	1.055	3.779
214719_at	SLC46A3	solute carrier family 46 member 3	1.055	3.709
1564653_s_at	LEKR1	leucine, glutamate and lysine rich 1	1.054	3.27
232664_at	LINC00954	long intergenic non-protein coding RNA 954	1.054	4.781
238762_at	MTHFD2L	methylenetetrahydrofolate dehydrogenase (NADP+ dependent) 2-like	1.053	3.061
203306_s_at	SLC35A1	solute carrier family 35 member A1	1.053	4.243
227485_at	INTS6L	integrator complex subunit 6 like	1.052	4.384
205887_x_at	MSH3	mutS homolog 3	1.052	2.725
223830_s_at	TRIM5	tripartite motif containing 5	1.052	4.496
224865_at	FAR1	fatty acyl-CoA reductase 1	1.051	3.896
231111_at	SCYL3	SCY1 like pseudokinase 3	1.051	2.574
1553909_x_at	SLF2	SMC5-SMC6 complex localization factor 2	1.051	5.078
1553099_at	TIGD1	tigger transposable element derived 1	1.051	3.809
206822_s_at	L3MBTL1	l(3)mbt-like 1 (Drosophila)	1.05	2.346
1562439_at	NCOA3	nuclear receptor coactivator 3	1.05	2.841
244008_at	PARP8	poly(ADP-ribose) polymerase family member 8	1.049	2.817
239193_at	FUBP3	far upstream element binding protein 3	1.048	3.879
215513_at	HYMAI	hydatidiform mole associated and imprinted (non-protein coding)	1.048	3.962
218352_at	RCBTB1	RCC1 and BTB domain containing protein 1	1.047	2.815
237891_at	MDM2	MDM2 proto-oncogene	1.044	2.512
229006_at	LOC100507487	uncharacterized LOC100507487	1.043	3.147
203675_at	NUCB2	nucleobindin 2	1.043	2.283
1555199_at	GOSR1	golgi SNAP receptor complex member 1	1.042	2.903
232414_at	HEATR1	HEAT repeat containing 1	1.042	3.6
1564970_at	SETDB2	SET domain bifurcated 2	1.042	3.488
238199_x_at	LOC101929612///COX3	uncharacterized LOC101929612///cytochrome c oxidase III	1.041	3.972
206572_x_at	ZNF85	zinc finger protein 85	1.041	2.904
202971_s_at	DYRK2	dual specificity tyrosine phosphorylation regulated kinase 2	1.04	3.074
221778_at	KDM7A	lysine demethylase 7A	1.04	2.351
227692_at	GNAI1	G protein subunit alpha i1	1.039	2.78
234801_s_at	ACSS1	acyl-CoA synthetase short-chain family member 1	1.038	4.05
233461_x_at	ZNF226	zinc finger protein 226	1.038	4.04
227930_at	AGO4	argonaute 4, RISC catalytic component	1.037	3.674
221039_s_at	ASAP1	ArfGAP with SH3 domain, ankyrin repeat and PH domain 1	1.036	2.9
208958_at	ERP44	endoplasmic reticulum protein 44	1.036	3.199
228209_at	LHX4-AS1	LHX4 antisense RNA 1	1.035	2.537
212792_at	DPY19L1	dpy-19 like 1	1.034	2.416
221203_s_at	YEATS2	YEATS domain containing 2	1.033	3.675
207604_s_at	SLC4A7	solute carrier family 4 member 7	1.031	3.7
1565829_at	CEP295	centrosomal protein 295	1.03	3.518
213213_at	DIDO1	death inducer-obliterator 1	1.03	4.32
210694_s_at	MID1	midline 1	1.028	2.991
1554910_at	PRKD3	protein kinase D3	1.028	2.529
217902_s_at	HERC2	HECT and RLD domain containing E3 ubiquitin protein ligase 2	1.027	4.458
232262_at	PIGL	phosphatidylinositol glycan anchor biosynthesis class L	1.027	3.551
215095_at	ESD	esterase D	1.026	4.232
204323_x_at	NF1P9///NF1	neurofibromin 1 pseudogene 9///neurofibromin 1	1.026	3.947
225330_at	IGF1R	insulin like growth factor 1 receptor	1.025	2.211
215597_x_at	LOC101929165	uncharacterized LOC101929165	1.025	4.225
228529_at	LSM8	LSM8 homolog, U6 small nuclear RNA associated	1.025	3.588
243630_at	NDUFB1	NADH:ubiquinone oxidoreductase subunit B1	1.025	3.322
225668_at	FAM173B	family with sequence similarity 173 member B	1.024	2.432
243796_at	HEXIM2	hexamethylene bisacetamide inducible 2	1.024	3.327
242712_x_at	RGPD2///RGPD6///RGPD8///RGPD3///RGPD1///RGPD4///RGPD5///RANBP2	RANBP2-like and GRIP domain containing 2///RANBP2-like and GRIP domain containing 6///RANBP2-like and GRIP domain containing 8///RANBP2-like and GRIP domain containing 3///RANBP2-like and GRIP domain containing 1///RANBP2-like and GRIP domain containing 4///RANBP2-like and GRIP domain containing 5///RAN binding protein 2	1.024	3.146
226040_at	TRIM56	tripartite motif containing 56	1.023	3.903
226962_at	ZBTB41	zinc finger and BTB domain containing 41	1.023	3.795
223700_at	MND1	meiotic nuclear divisions 1	1.022	2.917
226946_at	NADK2	NAD kinase 2, mitochondrial	1.022	4.184
215850_s_at	NDUFA5	NADH:ubiquinone oxidoreductase subunit A5	1.022	3.541
212557_at	ZNF451	zinc finger protein 451	1.022	3.676
229882_at	RPS15A	ribosomal protein S15a	1.018	2.593
229075_at	SPATA5	spermatogenesis associated 5	1.017	2.557
205884_at	ITGA4	integrin subunit alpha 4	1.016	3.456
212055_at	TPGS2	tubulin polyglutamylase complex subunit 2	1.016	2.419
212337_at	TUG1	taurine up-regulated 1 (non-protein coding)	1.016	3.913
242446_at	C6orf163	chromosome 6 open reading frame 163	1.015	2.65
1558965_at	PHF21A	PHD finger protein 21A	1.015	3.439
203374_s_at	TPP2	tripeptidyl peptidase 2	1.015	4.861
1560112_at	WDFY2	WD repeat and FYVE domain containing 2	1.014	3.474
223339_at	ATPIF1	ATPase inhibitory factor 1	1.01	3.386
1557100_s_at	HECTD1	HECT domain E3 ubiquitin protein ligase 1	1.01	3.645
238842_at	LOC102724002	uncharacterized LOC102724002	1.01	4.163
204013_s_at	LCMT2	leucine carboxyl methyltransferase 2	1.009	4.025
1570006_at	LOC400958	uncharacterized LOC400958	1.009	2.346
1556567_at	NAP1L4	nucleosome assembly protein 1 like 4	1.009	3.676
222104_x_at	GTF2H3	general transcription factor IIH subunit 3	1.007	4.194
1562236_at	KAT6B	lysine acetyltransferase 6B	1.007	3.727
1557167_at	HCG11	HLA complex group 11 (non-protein coding)	1.006	2.63
233054_at	CNOT2	CCR4-NOT transcription complex subunit 2	1.005	4.314
209975_at	CYP2E1	cytochrome P450 family 2 subfamily E member 1	1.005	3.115
232874_at	DOCK9	dedicator of cytokinesis 9	1.005	2.586
215190_at	EIF3M	eukaryotic translation initiation factor 3 subunit M	1.005	3.71
205425_at	HIP1	huntingtin interacting protein 1	1.005	2.266
241941_at	LOC105372255	uncharacterized LOC105372255	1.005	3.989
225396_at	RBBP4	RB binding protein 4, chromatin remodeling factor	1.005	4.332
211768_at	LAT2	linker for activation of T-cells family member 2	1.004	3.425
229265_at	SKI	SKI proto-oncogene	1.004	3.153
214030_at	CRYBG3	crystallin beta-gamma domain containing 3	1.003	2.678
212774_at	ZBTB18	zinc finger and BTB domain containing 18	1.003	2.823
241360_at	CCDC15	coiled-coil domain containing 15	1.002	2.329
233700_at	PPP1R12B	protein phosphatase 1 regulatory subunit 12B	1.002	3.261
215109_at	RC3H1	ring finger and CCCH-type domains 1	1.002	3.076
218827_s_at	CEP192	centrosomal protein 192	1.001	3.506
227129_x_at	LINC01000	long intergenic non-protein coding RNA 1000	1.001	2.928
225095_at	SPTLC2	serine palmitoyltransferase long chain base subunit 2	1.001	2.605
239760_at	COX11	COX11, cytochrome c oxidase copper chaperone	1	2.75
1559050_at	HCG27	HLA complex group 27 (non-protein coding)	1	3.599
40569_at	MZF1	myeloid zinc finger 1	1	4.353
217042_at	RDH11	retinol dehydrogenase 11 (all-trans/9-cis/11-cis)	0.999	2.238
213065_at	ZFC3H1	zinc finger C3H1-type containing	0.999	4.431
1553117_a_at	STK38	serine/threonine kinase 38	0.998	3.958
229553_at	PGM2L1	phosphoglucomutase 2 like 1	0.996	2.46
1552862_at	RUSC1-AS1	RUSC1 antisense RNA 1	0.996	4.684
241065_x_at	CMAS	cytidine monophosphate N-acetylneuraminic acid synthetase	0.995	3.069
57739_at	DND1	DND microRNA-mediated repression inhibitor 1	0.994	4.775
216411_s_at	GALK2	galactokinase 2	0.994	3.603
244669_at	SNORD50B///SNORD50A	small nucleolar RNA, C/D box 50B///small nucleolar RNA, C/D box 50A	0.993	4.679
232588_at	STAG1	stromal antigen 1	0.993	2.603
202478_at	TRIB2	tribbles pseudokinase 2	0.993	2.028
223771_at	TMEM87A	transmembrane protein 87A	0.992	3.983
213007_at	FANCI	Fanconi anemia complementation group I	0.991	3.526
219359_at	PGGHG	protein-glucosylgalactosylhydroxylysine glucosidase	0.99	3.366
232303_at	ZNF608	zinc finger protein 608	0.989	2.238
237606_at	CD53	CD53 molecule	0.988	3.037
231119_at	RFC3	replication factor C subunit 3	0.988	3.487
226742_at	SAR1B	secretion associated Ras related GTPase 1B	0.988	2.563
235031_at	INVS///WSB1	inversin///WD repeat and SOCS box containing 1	0.987	4.296
244429_at	LOC101928617	uncharacterized LOC101928617	0.987	2.731
226452_at	PDK1	pyruvate dehydrogenase kinase 1	0.987	2.439
230450_at	SEPT7-AS1	SEPT7 antisense RNA 1 (head to head)	0.987	3.069
203513_at	SPG11	spastic paraplegia 11 (autosomal recessive)	0.987	4.433
222708_s_at	STX17	syntaxin 17	0.987	4.301
230047_at	ARHGAP42	Rho GTPase activating protein 42	0.986	2.4
243051_at	CNIH4	cornichon family AMPA receptor auxiliary protein 4	0.986	2.398
215169_at	SLC35E2B///SLC35E2	solute carrier family 35 member E2B///solute carrier family 35 member E2	0.985	2.84
219164_s_at	ATG2B	autophagy related 2B	0.984	3.739
230166_at	KIAA1958	KIAA1958	0.984	2.989
214250_at	NUMA1	nuclear mitotic apparatus protein 1	0.984	4.26
1554206_at	TMLHE	trimethyllysine hydroxylase, epsilon	0.984	4.763
236668_at	LOC101926967	uncharacterized LOC101926967	0.983	3.877
231088_at	MORF4L2-AS1	MORF4L2 antisense RNA 1	0.983	3.089
200940_s_at	RERE	arginine-glutamic acid dipeptide repeats	0.983	2.596
207711_at	SOGA1	suppressor of glucose, autophagy associated 1	0.983	2.364
1561937_x_at	IGHV4-31///IGHM///IGHG1///IGHA1	immunoglobulin heavy variable 4-31///immunoglobulin heavy constant mu///immunoglobulin heavy constant gamma 1 (G1m marker)///immunoglobulin heavy constant alpha 1	0.982	3.197
203804_s_at	LUC7L3	LUC7 like 3 pre-mRNA splicing factor	0.982	4.607
1553407_at	MACF1	microtubule-actin crosslinking factor 1	0.982	4.483
222133_s_at	PHF20L1	PHD finger protein 20-like 1	0.981	2.863
232406_at	LOC105372526	uncharacterized LOC105372526	0.98	3.193
1559822_s_at	MTDH	metadherin	0.979	3.259
218422_s_at	RBM26	RNA binding motif protein 26	0.979	4.063
223542_at	SLF1	SMC5-SMC6 complex localization factor 1	0.979	2.784
230378_at	SCGB3A1	secretoglobin family 3A member 1	0.978	2.256
215640_at	TBC1D2B	TBC1 domain family member 2B	0.978	3.797
226105_at	C1GALT1	core 1 synthase, glycoprotein-N-acetylgalactosamine 3-beta-galactosyltransferase 1	0.976	2.002
1558348_at	DET1	de-etiolated homolog 1 (Arabidopsis)	0.975	3.864
230815_at	LOC389765	kinesin family member 27 pseudogene	0.974	4.372
228174_at	SCAI	suppressor of cancer cell invasion	0.974	3.481
1554824_at	ZNF585A	zinc finger protein 585A	0.974	2.946
1555372_at	BCL2L11	BCL2 like 11	0.973	2.704
1552536_at	VTI1A	vesicle transport through interaction with t-SNAREs 1A	0.973	3.298
208772_at	ANKHD1-EIF4EBP3///ANKHD1	ANKHD1-EIF4EBP3 readthrough///ankyrin repeat and KH domain containing 1	0.972	4.399
220694_at	ASAP1-IT1	ASAP1 intronic transcript 1	0.972	2.99
227239_at	FAM126A	family with sequence similarity 126 member A	0.972	3.021
235690_at	ZNF594	zinc finger protein 594	0.972	3.252
215069_at	NMT2	N-myristoyltransferase 2	0.971	3.77
211464_x_at	CASP6	caspase 6	0.97	2.869
235822_at	COQ9	coenzyme Q9	0.97	3.722
225633_at	DPY19L3	dpy-19 like 3 (C. elegans)	0.97	2.581
239034_at	LINC01560	long intergenic non-protein coding RNA 1560	0.97	2.696
1555439_at	GTF3C3	general transcription factor IIIC subunit 3	0.969	3.066
232945_at	PUS10	pseudouridylate synthase 10	0.969	3.595
244743_x_at	ZNF138	zinc finger protein 138	0.969	2.483
202532_s_at	DHFR	dihydrofolate reductase	0.968	2.83
1552386_at	GAPT	GRB2-binding adaptor protein, transmembrane	0.968	2.09
221763_at	JMJD1C	jumonji domain containing 1C	0.968	3.926
231866_at	LNPEP	leucyl and cystinyl aminopeptidase	0.968	2.711
228963_at	RSBN1L	round spermatid basic protein 1 like	0.968	3.299
1559479_at	SEPSECS-AS1	SEPSECS antisense RNA 1 (head to head)	0.967	3.745
1556021_at	GPR180	G protein-coupled receptor 180	0.966	2.297
230187_s_at	LOC102724851	uncharacterized LOC102724851	0.966	2.44
219828_at	RABL6	RAB, member RAS oncogene family-like 6	0.966	3.365
221125_s_at	KCNMB3	potassium calcium-activated channel subfamily M regulatory beta subunit 3	0.965	4.33
215629_s_at	MIR15A///DLEU2L///DLEU2	microRNA 15a///deleted in lymphocytic leukemia 2-like///deleted in lymphocytic leukemia 2 (non-protein coding)	0.965	3.199
210800_at	TIMM8A	translocase of inner mitochondrial membrane 8 homolog A (yeast)	0.965	2.205
222673_x_at	FAM122B	family with sequence similarity 122B	0.964	3.788
218683_at	PTBP2	polypyrimidine tract binding protein 2	0.964	3.062
1554889_at	TIA1	TIA1 cytotoxic granule-associated RNA binding protein	0.964	4.068
226525_at	STK17B	serine/threonine kinase 17b	0.961	3.351
224635_s_at	BIRC6	baculoviral IAP repeat containing 6	0.96	4.187
215188_at	STK24	serine/threonine kinase 24	0.96	3.346
220078_at	USP48	ubiquitin specific peptidase 48	0.959	3.633
224938_at	NUFIP2	NUFIP2, FMR1 interacting protein 2	0.958	2.854
1559101_at	FYN	FYN proto-oncogene, Src family tyrosine kinase	0.957	3.526
238480_at	TTC39C	tetratricopeptide repeat domain 39C	0.957	2.695
227213_at	ADAT2	adenosine deaminase, tRNA specific 2	0.956	3.232
227040_at	NHLRC3	NHL repeat containing 3	0.956	3.382
212615_at	CHD9	chromodomain helicase DNA binding protein 9	0.955	2.481
1557177_at	LOC100506258	uncharacterized LOC100506258	0.955	2.381
207474_at	SNRK	SNF related kinase	0.955	3.174
219012_s_at	EMSY	EMSY, BRCA2 interacting transcriptional repressor	0.954	2.421
210714_at	R3HDM1	R3H domain containing 1	0.954	3.346
223028_s_at	SNX9	sorting nexin 9	0.954	2.442
227109_at	CYP2R1	cytochrome P450 family 2 subfamily R member 1	0.953	2.976
226965_at	DENND6A	DENN domain containing 6A	0.953	2.918
1553992_s_at	NBR2	neighbor of BRCA1 gene 2 (non-protein coding)	0.953	2.537
1553685_s_at	SP1	Sp1 transcription factor	0.953	3.738
201362_at	IVNS1ABP	influenza virus NS1A binding protein	0.952	3.724
1564639_at	LOC100291323	uncharacterized LOC100291323	0.951	3.846
1555749_at	SF1	splicing factor 1	0.951	3.087
228929_at	DNASE1	deoxyribonuclease 1	0.95	3.454
212982_at	ZDHHC17	zinc finger DHHC-type containing 17	0.95	4.284
225929_s_at	RNF213	ring finger protein 213	0.949	3.082
221878_at	C2orf68	chromosome 2 open reading frame 68	0.948	3.078
226125_at	LOC100288152	uncharacterized LOC100288152	0.948	2.95
235789_at	LOC100507022///KDM4B	FLJ00291 protein///lysine demethylase 4B	0.948	2.631
1564962_at	ZNF92	zinc finger protein 92	0.948	2.622
226917_s_at	ANAPC4	anaphase promoting complex subunit 4	0.947	3.824
223814_at	TRNT1	tRNA nucleotidyl transferase 1	0.947	2.353
202072_at	HNRNPL	heterogeneous nuclear ribonucleoprotein L	0.946	3.68
204972_at	OAS2	2'-5'-oligoadenylate synthetase 2	0.946	2.665
207828_s_at	CENPF	centromere protein F	0.945	3.066
1553380_at	PARP15	poly(ADP-ribose) polymerase family member 15	0.945	2.428
207117_at	ZNF117	zinc finger protein 117	0.945	3.413
222566_at	KMT5B	lysine methyltransferase 5B	0.944	2.666
217627_at	ZNF573	zinc finger protein 573	0.944	4.03
237040_at	CWF19L2	CWF19-like 2, cell cycle control (S. pombe)	0.943	4.457
239699_s_at	PMS2P5///PMS2P1	PMS1 homolog 2, mismatch repair system component pseudogene 5///PMS1 homolog 2, mismatch repair system component pseudogene 1	0.942	3.662
219941_at	TMEM19	transmembrane protein 19	0.942	2.749
220352_x_at	FLJ42627	uncharacterized LOC645644	0.941	3.131
1552611_a_at	JAK1	Janus kinase 1	0.941	4.296
225117_at	KANSL1	KAT8 regulatory NSL complex subunit 1	0.941	4.688
239043_at	ZNF404	zinc finger protein 404	0.941	2.331
235661_at	POU2F2	POU class 2 homeobox 2	0.94	3.309
227409_at	PPP1R3E	protein phosphatase 1 regulatory subunit 3E	0.94	2.445
240101_at	STAM-AS1	STAM antisense RNA 1 (head to head)	0.939	3.627
239644_at	ZC3H8	zinc finger CCCH-type containing 8	0.938	3.119
226521_s_at	FAM175A	family with sequence similarity 175 member A	0.937	2.385
1552760_at	HDAC9	histone deacetylase 9	0.937	4.121
233780_at	RIF1	replication timing regulatory factor 1	0.937	2.438
236832_at	ADCY10P1	adenylate cyclase 10, soluble pseudogene 1	0.936	2.465
202769_at	CCNG2	cyclin G2	0.936	3.497
220063_at	GSTCD	glutathione S-transferase C-terminal domain containing	0.936	3.25
206789_s_at	POU2F1	POU class 2 homeobox 1	0.936	3.503
230012_at	LINC00324	long intergenic non-protein coding RNA 324	0.935	3.818
203724_s_at	RUFY3	RUN and FYVE domain containing 3	0.935	2.855
1558142_at	TNRC6B	trinucleotide repeat containing 6B	0.935	2.782
242633_x_at	ZNF75A	zinc finger protein 75a	0.935	3.335
1556097_at	HOMER2	homer scaffolding protein 2	0.934	2.549
1558815_at	SORBS2	sorbin and SH3 domain containing 2	0.934	3.2
207133_x_at	ALPK1	alpha kinase 1	0.933	3.857
218248_at	FAM111A	family with sequence similarity 111 member A	0.933	3.555
46947_at	GNL3L	G protein nucleolar 3 like	0.933	4.672
221221_s_at	KLHL3	kelch like family member 3	0.932	2.513
226977_at	IGIP	IgA inducing protein	0.931	2.832
233483_at	TBC1D27	TBC1 domain family member 27	0.931	2.844
244011_at	PPM1K	protein phosphatase, Mg2+/Mn2+ dependent 1K	0.93	3.163
234133_s_at	TMEM116	transmembrane protein 116	0.93	2.888
230712_at	LOC102724250///LOC101930059///NBPF15///NBPF11///NBPF1	neuroblastoma breakpoint family member 1///uncharacterized LOC101930059///neuroblastoma breakpoint family member 15///neuroblastoma breakpoint family member 11///neuroblastoma breakpoint family member 1	0.928	3.29
235571_at	MIR34A	microRNA 34a	0.928	2.604
226020_s_at	OMA1///DAB1	OMA1 zinc metallopeptidase///DAB1, reelin adaptor protein	0.928	2.959
213659_at	ZNF75D	zinc finger protein 75D	0.928	2.845
214220_s_at	ALMS1	ALMS1, centrosome and basal body associated protein	0.927	2.685
213375_s_at	N4BP2L1	NEDD4 binding protein 2 like 1	0.927	2.15
204538_x_at	NPIPA1	nuclear pore complex interacting protein family member A1	0.927	3.929
208933_s_at	LGALS8	galectin 8	0.926	2.793
1558331_at	SIRT2	sirtuin 2	0.926	3.785
226348_at	FUT11	fucosyltransferase 11	0.925	3.62
203243_s_at	PDLIM5	PDZ and LIM domain 5	0.925	2.266
228545_at	ZNF148	zinc finger protein 148	0.925	3.529
204516_at	ATXN7	ataxin 7	0.924	3.174
204373_s_at	CEP350	centrosomal protein 350	0.924	3.499
202909_at	EPM2AIP1	EPM2A interacting protein 1	0.924	2.829
223203_at	FAM156B///FAM156A	family with sequence similarity 156 member B///family with sequence similarity 156 member A	0.924	3.838
203633_at	CPT1A	carnitine palmitoyltransferase 1A	0.923	2.451
219396_s_at	MIR631///NEIL1	microRNA 631///nei like DNA glycosylase 1	0.923	2.283
226693_at	SDHAP2///LINC00969///SDHAP1	succinate dehydrogenase complex flavoprotein subunit A pseudogene 2///long intergenic non-protein coding RNA 969///succinate dehydrogenase complex flavoprotein subunit A pseudogene 1	0.923	2.982
1552680_a_at	KNL1	kinetochore scaffold 1	0.922	2.836
1566111_at	PIEZO1	piezo type mechanosensitive ion channel component 1	0.921	2.923
213017_at	ABHD3	abhydrolase domain containing 3	0.92	3.607
209770_at	BTN3A1	butyrophilin subfamily 3 member A1	0.92	2.532
212943_at	C2CD5	C2 calcium dependent domain containing 5	0.92	3.05
1568717_a_at	FKBP15	FK506 binding protein 15	0.92	3.223
243124_at	RRN3P2	RRN3 homolog, RNA polymerase I transcription factor pseudogene 2	0.92	3.475
215035_at	IGLV6-57	immunoglobulin lambda variable 6-57	0.918	2.153
227648_at	SMDT1	single-pass membrane protein with aspartate rich tail 1	0.918	3.025
223652_at	AS3MT	arsenite methyltransferase	0.916	3.744
219865_at	LINC00339	long intergenic non-protein coding RNA 339	0.916	2.458
201663_s_at	SMC4	structural maintenance of chromosomes 4	0.916	3.87
228001_at	TMEM50B	transmembrane protein 50B	0.916	2.85
204820_s_at	BTN3A2///BTN3A3	butyrophilin subfamily 3 member A2///butyrophilin subfamily 3 member A3	0.915	2.362
217584_at	NPC1	NPC intracellular cholesterol transporter 1	0.915	2.802
1559731_x_at	MACROD1	MACRO domain containing 1	0.914	3.875
205922_at	VNN2	vanin 2	0.914	2.398
207790_at	LRRC1	leucine rich repeat containing 1	0.913	3.402
224227_s_at	BDP1	B double prime 1, subunit of RNA polymerase III transcription initiation factor IIIB	0.912	2.815
202983_at	HLTF	helicase like transcription factor	0.912	2.648
225954_s_at	MIDN	midnolin	0.912	2.848
222208_s_at	POLR2J4	RNA polymerase II subunit J4, pseudogene	0.912	2.837
228088_at	SESTD1	SEC14 and spectrin domain containing 1	0.912	3.011
1558392_at	SYNE2	spectrin repeat containing nuclear envelope protein 2	0.912	2.641
220022_at	ZNF334	zinc finger protein 334	0.912	2.031
216229_x_at	LOC105379655	uncharacterized LOC105379655	0.911	2.217
225760_at	MYSM1	Myb like, SWIRM and MPN domains 1	0.911	3.015
226041_at	NAPEPLD	N-acyl phosphatidylethanolamine phospholipase D	0.911	2.423
202561_at	TNKS	tankyrase	0.911	2.465
217208_s_at	DLG1	discs large MAGUK scaffold protein 1	0.91	2.821
204158_s_at	TCIRG1	T-cell immune regulator 1, ATPase H+ transporting V0 subunit a3	0.91	3.744
1557302_at	ZNF585B	zinc finger protein 585B	0.91	2.674
235290_at	ZNF782	zinc finger protein 782	0.91	2.532
225856_at	CLOCK	clock circadian regulator	0.909	3.448
202384_s_at	TCOF1	treacle ribosome biogenesis factor 1	0.909	3.386
222112_at	EPS15L1	epidermal growth factor receptor pathway substrate 15 like 1	0.908	4.385
203394_s_at	HES1	hes family bHLH transcription factor 1	0.908	3
212571_at	CHD8	chromodomain helicase DNA binding protein 8	0.907	4.058
225506_at	KIAA1468	KIAA1468	0.906	4.459
212808_at	NFATC2IP	nuclear factor of activated T-cells 2 interacting protein	0.906	2.52
210461_s_at	ABLIM1	actin binding LIM protein 1	0.905	3.813
1558105_a_at	SLC9A7	solute carrier family 9 member A7	0.905	3.466
207186_s_at	BPTF	bromodomain PHD finger transcription factor	0.904	4.365
1570048_at	DNAJC24	DnaJ heat shock protein family (Hsp40) member C24	0.904	2.663
215560_x_at	MTRF1L	mitochondrial translational release factor 1 like	0.904	4.421
1558430_at	PDXDC1	pyridoxal dependent decarboxylase domain containing 1	0.904	3.328
207115_x_at	MBTD1	mbt domain containing 1	0.903	3.822
224772_at	NAV1	neuron navigator 1	0.903	2.151
227162_at	ZBTB26	zinc finger and BTB domain containing 26	0.903	4.347
203521_s_at	ZNF318	zinc finger protein 318	0.903	2.959
208368_s_at	BRCA2	BRCA2, DNA repair associated	0.902	2.522
221192_x_at	MFSD11	major facilitator superfamily domain containing 11	0.902	4.075
1557192_at	COX10-AS1	COX10 antisense RNA 1	0.901	2.172
228831_s_at	GNG7	G protein subunit gamma 7	0.899	2.128
226413_at	LINC00938	long intergenic non-protein coding RNA 938	0.899	3.368
225610_at	UHRF2	ubiquitin like with PHD and ring finger domains 2	0.899	4.155
235132_at	NIFK-AS1	NIFK antisense RNA 1	0.898	3.194
201918_at	SLC25A36	solute carrier family 25 member 36	0.898	4.028
1556204_a_at	ZNF814	zinc finger protein 814	0.898	2.687
227353_at	TMC8	transmembrane channel like 8	0.897	3.395
1570135_at	ZNF230	zinc finger protein 230	0.897	2.262
222088_s_at	SLC2A14///SLC2A3	solute carrier family 2 member 14///solute carrier family 2 member 3	0.896	2.465
1554067_at	C12orf66	chromosome 12 open reading frame 66	0.895	2.051
242852_at	LOC285147	uncharacterized LOC285147	0.895	2.803
230174_at	LYPLAL1	lysophospholipase like 1	0.895	2.488
226153_s_at	CNOT6L	CCR4-NOT transcription complex subunit 6 like	0.894	3.143
226001_at	KLHL5	kelch like family member 5	0.894	3.077
232077_s_at	YPEL3	yippee like 3	0.893	3.538
1552287_s_at	AFG3L1P	AFG3 like matrix AAA peptidase subunit 1, pseudogene	0.892	3.432
230937_at	LOC101929072///LOC285835	uncharacterized LOC101929072///uncharacterized LOC285835	0.892	2.36
235259_at	PACRGL	PARK2 coregulated like	0.892	2.55
228049_x_at	SNHG19	small nucleolar RNA host gene 19	0.892	2.111
225181_at	ARID1B	AT-rich interaction domain 1B	0.891	3.103
230178_s_at	ELP2	elongator acetyltransferase complex subunit 2	0.891	2.179
215467_x_at	LOC647070	nascent polypeptide-associated complex subunit alpha, muscle-specific form-like	0.891	3.369
244699_at	AHI1	Abelson helper integration site 1	0.89	2.856
228190_at	ATG4C	autophagy related 4C cysteine peptidase	0.89	3.8
209902_at	ATR	ATR serine/threonine kinase	0.89	2.652
235609_at	BRIP1	BRCA1 interacting protein C-terminal helicase 1	0.89	3.355
1556925_at	SMC3	structural maintenance of chromosomes 3	0.89	3.056
224231_at	PRO0471	uncharacterized LOC28994	0.889	2.206
209444_at	RAP1GDS1	Rap1 GTPase-GDP dissociation stimulator 1	0.889	2.669
236291_at	RDH5	retinol dehydrogenase 5	0.888	1.988
218430_s_at	RFX7	regulatory factor X7	0.888	2.688
1569106_s_at	SETD5	SET domain containing 5	0.888	2.372
227450_at	ERP27	endoplasmic reticulum protein 27	0.887	2.565
242560_at	FANCD2	Fanconi anemia complementation group D2	0.887	4.19
232024_at	GIMAP2	GTPase, IMAP family member 2	0.887	2.422
232284_at	PSMD6-AS2	PSMD6 antisense RNA 2	0.887	3.931
1554287_at	TRIM4	tripartite motif containing 4	0.887	4.189
222999_s_at	CCNL2	cyclin L2	0.886	3.916
1566480_x_at	MEIOC	meiosis specific with coiled-coil domain	0.886	2.387
203688_at	PKD2	polycystin 2, transient receptor potential cation channel	0.886	3.061
201935_s_at	EIF4G3	eukaryotic translation initiation factor 4 gamma 3	0.885	3.333
231872_at	LRRCC1	leucine rich repeat and coiled-coil centrosomal protein 1	0.885	2.21
230880_at	KIAA1652	KIAA1652 protein	0.884	2.082
217646_at	SURF1	surfeit 1	0.884	2.772
204531_s_at	BRCA1	BRCA1, DNA repair associated	0.883	3.579
223279_s_at	UACA	uveal autoantigen with coiled-coil domains and ankyrin repeats	0.883	2.606
1562271_x_at	ARHGEF7	Rho guanine nucleotide exchange factor 7	0.882	3.463
243705_at	DDHD1	DDHD domain containing 1	0.882	2.693
208988_at	KDM2A	lysine demethylase 2A	0.882	3.55
206133_at	XAF1	XIAP associated factor 1	0.882	3.113
238824_at	RPS29	ribosomal protein S29	0.879	2.739
218829_s_at	CHD7	chromodomain helicase DNA binding protein 7	0.878	4.2
217914_at	TPCN1	two pore segment channel 1	0.878	3.883
1557347_at	MCPH1	microcephalin 1	0.877	3.326
227025_at	PPHLN1	periphilin 1	0.877	3.782
205178_s_at	RBBP6	RB binding protein 6, ubiquitin ligase	0.877	3.667
208072_s_at	DGKD	diacylglycerol kinase delta	0.876	3.249
235322_at	LOC101927151	uncharacterized LOC101927151	0.876	3.05
1569594_a_at	NEMF	nuclear export mediator factor	0.876	3.899
232931_at	SNRNP200	small nuclear ribonucleoprotein U5 subunit 200	0.875	3.134
218184_at	TULP4	tubby like protein 4	0.875	2.979
225231_at	CBL	Cbl proto-oncogene	0.874	3.471
1555889_a_at	CRTAP	cartilage associated protein	0.874	2.005
1562777_at	ERV3-1	endogenous retrovirus group 3 member 1	0.874	2.752
1557289_s_at	GTF2IRD2	GTF2I repeat domain containing 2	0.874	3.03
224595_at	SLC44A1	solute carrier family 44 member 1	0.873	2.135
212756_s_at	UBR2	ubiquitin protein ligase E3 component n-recognin 2	0.872	3.192
243439_at	ZNF418	zinc finger protein 418	0.872	2.794
212614_at	ARID5B	AT-rich interaction domain 5B	0.871	2.364
212406_s_at	PCMTD2	protein-L-isoaspartate (D-aspartate) O-methyltransferase domain containing 2	0.871	3.552
204645_at	CCNT2	cyclin T2	0.87	3.915
204454_at	LDOC1	leucine zipper down-regulated in cancer 1	0.87	2.983
1563272_at	TBC1D8B	TBC1 domain family member 8B	0.87	3.118
203148_s_at	TRIM14	tripartite motif containing 14	0.87	4.483
1562648_at	CCDC88A	coiled-coil domain containing 88A	0.869	2.855
225563_at	PAN3	PAN3 poly(A) specific ribonuclease subunit	0.869	2.606
1561714_a_at	B3GALNT2	beta-1,3-N-acetylgalactosaminyltransferase 2	0.868	2.943
219351_at	TRAPPC2	trafficking protein particle complex 2	0.868	2.555
205544_s_at	CR2	complement component 3d receptor 2	0.867	2.136
242778_at	LPXN	leupaxin	0.867	3.995
207797_s_at	LRP2BP	LRP2 binding protein	0.867	2.704
210401_at	P2RX1	purinergic receptor P2X 1	0.867	2.432
228499_at	PFKFB4	6-phosphofructo-2-kinase/fructose-2,6-biphosphatase 4	0.867	2.097
229456_s_at	DDAH1	dimethylarginine dimethylaminohydrolase 1	0.866	3.528
1556357_s_at	ERICH1	glutamate rich 1	0.866	3.903
226875_at	DOCK11	dedicator of cytokinesis 11	0.865	3.14
227410_at	FAM43A	family with sequence similarity 43 member A	0.865	2.419
1556498_at	FAM69A	family with sequence similarity 69 member A	0.864	2.093
1569608_x_at	LOC105379426	ankyrin repeat domain-containing protein 20A2	0.864	2.451
1568702_a_at	PAAF1	proteasomal ATPase associated factor 1	0.864	3.274
227817_at	PRKCB	protein kinase C beta	0.864	2.85
209678_s_at	PRKCI	protein kinase C iota	0.864	3.088
207287_at	BIN3-IT1	BIN3 intronic transcript 1	0.863	3.282
220216_at	C8orf44	chromosome 8 open reading frame 44	0.863	2.848
211928_at	DYNC1H1	dynein cytoplasmic 1 heavy chain 1	0.863	2.689
243699_at	LOC100507006	uncharacterized LOC100507006	0.863	2.379
217862_at	PIAS1	protein inhibitor of activated STAT 1	0.863	4.586
225363_at	PTEN	phosphatase and tensin homolog	0.863	2.266
228571_at	RBAK	RB associated KRAB zinc finger	0.863	4.134
225383_at	ZNF275	zinc finger protein 275	0.863	3.5
224900_at	ANKFY1	ankyrin repeat and FYVE domain containing 1	0.862	4.129
1558217_at	SLFN13	schlafen family member 13	0.862	2.157
226035_at	USP31	ubiquitin specific peptidase 31	0.862	4.075
232004_at	HNRNPR	heterogeneous nuclear ribonucleoprotein R	0.861	2.377
220933_s_at	ZCCHC6	zinc finger CCHC-type containing 6	0.861	3.653
213557_at	CDK12	cyclin dependent kinase 12	0.86	2.621
242889_x_at	FUT8-AS1	FUT8 antisense RNA 1	0.858	3.52
224720_at	MIB1	mindbomb E3 ubiquitin protein ligase 1	0.858	2.61
212345_s_at	CREB3L2	cAMP responsive element binding protein 3 like 2	0.857	2.845
203420_at	FAM8A1	family with sequence similarity 8 member A1	0.857	2.624
232161_x_at	PTPN4	protein tyrosine phosphatase, non-receptor type 4	0.857	3.262
209509_s_at	DPAGT1	dolichyl-phosphate N-acetylglucosaminephosphotransferase 1	0.856	3.223
227203_at	FBXL17	F-box and leucine rich repeat protein 17	0.856	2.499
229896_at	LOC101926943	uncharacterized LOC101926943	0.856	2.48
225318_at	WHSC1L1	Wolf-Hirschhorn syndrome candidate 1-like 1	0.856	4.473
232635_at	CEP128	centrosomal protein 128	0.855	2.269
238541_at	C21orf58	chromosome 21 open reading frame 58	0.854	2.633
232288_at	LOC102724985///PDXDC2P///PDXDC1	pyridoxal-dependent decarboxylase domain-containing protein 1///pyridoxal dependent decarboxylase domain containing 2, pseudogene///pyridoxal dependent decarboxylase domain containing 1	0.854	2.225
226894_at	SLC35A3	solute carrier family 35 member A3	0.854	3.459
229333_at	GMPS	guanine monophosphate synthase	0.853	3.571
238485_at	IQCH-AS1	IQCH antisense RNA 1	0.853	2.42
1554021_a_at	ZNF12	zinc finger protein 12	0.853	4.073
1557228_at	EHBP1L1	EH domain binding protein 1 like 1	0.852	3.297
226671_at	LAMP2	lysosomal associated membrane protein 2	0.852	3.176
1552323_s_at	FAM122C	family with sequence similarity 122C	0.85	2.303
213262_at	SACS	sacsin molecular chaperone	0.85	3.402
201589_at	SMC1A	structural maintenance of chromosomes 1A	0.85	2.618
235890_at	TBL1XR1	transducin (beta)-like 1 X-linked receptor 1	0.85	3.31
223497_at	FAM135A	family with sequence similarity 135 member A	0.849	2.521
243077_at	FLJ16734	uncharacterized LOC641928	0.849	3.341
232611_at	GOLGA2P5	golgin A2 pseudogene 5	0.849	3.175
215156_at	WDR61	WD repeat domain 61	0.849	2.722
218554_s_at	ASH1L	ASH1 like histone lysine methyltransferase	0.848	2.433
225302_at	TMX3	thioredoxin related transmembrane protein 3	0.848	3.269
225295_at	SLC39A10	solute carrier family 39 member 10	0.847	2.445
220600_at	ELP6	elongator acetyltransferase complex subunit 6	0.846	2.781
221286_s_at	MZB1	marginal zone B and B1 cell specific protein	0.846	2.453
226392_at	RASA2	RAS p21 protein activator 2	0.846	2.167
225178_at	TTC14	tetratricopeptide repeat domain 14	0.846	3.638
1558017_s_at	PAWR	pro-apoptotic WT1 regulator	0.845	2.542
243539_at	KIAA1841	KIAA1841	0.844	3.379
204403_x_at	LOC100294033///TCAF1	protein FAM115A-like///TRPM8 channel associated factor 1	0.844	3.482
213575_at	TRA2A	transformer 2 alpha homolog	0.844	2.398
213328_at	NEK1	NIMA related kinase 1	0.842	3.381
202663_at	WIPF1	WAS/WASL interacting protein family member 1	0.842	2.611
1566129_at	LIMS1	LIM zinc finger domain containing 1	0.84	3.159
202759_s_at	PALM2-AKAP2///AKAP2	PALM2-AKAP2 readthrough///A-kinase anchoring protein 2	0.84	2.298
1561720_at	RECQL5	RecQ like helicase 5	0.84	2.21
228718_at	ZNF44	zinc finger protein 44	0.84	2.575
233078_at	API5	apoptosis inhibitor 5	0.839	3.282
239207_at	KDM5C	lysine demethylase 5C	0.839	3.172
207057_at	SLC16A7	solute carrier family 16 member 7	0.839	2.543
228855_at	NUDT7	nudix hydrolase 7	0.838	3.26
218370_s_at	S100PBP	S100P binding protein	0.838	3.044
216459_x_at	DDR1-AS1	DDR1 antisense RNA 1 (head to head)	0.837	4.053
224842_at	LOC101060386///BOLA2///SMG1	putative uncharacterized SMG1-like protein///bolA family member 2///SMG1, nonsense mediated mRNA decay associated PI3K related kinase	0.837	3.349
216263_s_at	NGDN	neuroguidin	0.837	2.19
1569685_at	COX10	COX10, heme A:farnesyltransferase cytochrome c oxidase assembly factor	0.836	3.306
236278_at	HIST1H3E	histone cluster 1, H3e	0.836	2.088
226741_at	SLC12A6	solute carrier family 12 member 6	0.836	2.176
225927_at	MAP3K1	mitogen-activated protein kinase kinase kinase 1	0.835	2.079
206060_s_at	PTPN22	protein tyrosine phosphatase, non-receptor type 22	0.835	3.169
226948_at	RHBDD1	rhomboid domain containing 1	0.835	3.319
214148_at	LOC100507424///ITFG2	uncharacterized LOC100507424///integrin alpha FG-GAP repeat containing 2	0.834	2.46
206641_at	TNFRSF17	TNF receptor superfamily member 17	0.834	2.196
236312_at	MAD2L1	MAD2 mitotic arrest deficient-like 1 (yeast)	0.833	2.733
1557737_s_at	NKTR	natural killer cell triggering receptor	0.831	2.623
231770_x_at	WDPCP	WD repeat containing planar cell polarity effector	0.831	3.968
230404_at	C5orf63	chromosome 5 open reading frame 63	0.83	2.387
214124_x_at	FGFR1OP	FGFR1 oncogene partner	0.83	2.846
1562033_at	KTN1	kinectin 1	0.83	3.591
1569520_at	LOC101929747	uncharacterized LOC101929747	0.83	3.117
204771_s_at	TTF1	transcription termination factor 1	0.83	3.823
229986_at	ZNF717	zinc finger protein 717	0.828	3.231
221625_at	ZNF506	zinc finger protein 506	0.827	3.463
219834_at	CARF	calcium responsive transcription factor	0.826	3.552
236863_at	C17orf67	chromosome 17 open reading frame 67	0.825	2.377
1555411_a_at	CCNL1	cyclin L1	0.825	3.672
232281_at	LINC00662	long intergenic non-protein coding RNA 662	0.825	3.568
227751_at	PDCD5	programmed cell death 5	0.825	3.788
243570_at	SPCS2	signal peptidase complex subunit 2	0.825	2.221
219147_s_at	NMRK1	nicotinamide riboside kinase 1	0.824	3.532
228252_at	PIF1	PIF1 5'-to-3' DNA helicase	0.824	3.888
227094_at	DHTKD1	dehydrogenase E1 and transketolase domain containing 1	0.823	3.176
227157_at	PRIMPOL	primase and DNA directed polymerase	0.823	3.059
212467_at	DNAJC13	DnaJ heat shock protein family (Hsp40) member C13	0.822	3.368
210710_at	AGGF1	angiogenic factor with G-patch and FHA domains 1	0.821	3.365
243282_at	CCDC93	coiled-coil domain containing 93	0.821	3.748
243785_at	LOC100272217	uncharacterized LOC100272217	0.821	2.61
202466_at	PAPD7	poly(A) RNA polymerase D7, non-canonical	0.821	3.996
201915_at	SEC63	SEC63 homolog, protein translocation regulator	0.821	2.272
208882_s_at	UBR5	ubiquitin protein ligase E3 component n-recognin 5	0.821	2.937
201737_s_at	2023-03-06	membrane associated ring-CH-type finger 6	0.82	2.361
212583_at	AQR	aquarius intron-binding spliceosomal factor	0.82	2.496
206150_at	CD27	CD27 molecule	0.819	2.035
1570200_at	HELB	DNA helicase B	0.819	3.245
244092_at	ZRANB3	zinc finger RANBP2-type containing 3	0.818	3.195
229538_s_at	IQGAP3	IQ motif containing GTPase activating protein 3	0.817	3.604
227407_at	TAPT1	transmembrane anterior posterior transformation 1	0.817	3.873
205467_at	CASP10	caspase 10	0.815	2.522
228427_at	FBXO16	F-box protein 16	0.815	2.249
226792_s_at	KIFC2	kinesin family member C2	0.815	2.783
204243_at	RLF	rearranged L-myc fusion	0.815	2.954
209889_at	SEC31B	SEC31 homolog B, COPII coat complex component	0.815	2.97
225219_at	SMAD5	SMAD family member 5	0.815	1.991
213930_at	ATG12	autophagy related 12	0.814	2.049
235027_at	ZNF736	zinc finger protein 736	0.813	2.367
219284_at	HSPBAP1	HSPB1 associated protein 1	0.812	2.856
219202_at	RHBDF2	rhomboid 5 homolog 2	0.812	3.01
233937_at	GGNBP2	gametogenetin binding protein 2	0.811	2.111
224359_s_at	HOOK3	hook microtubule tethering protein 3	0.811	3.522
213483_at	PPWD1	peptidylprolyl isomerase domain and WD repeat containing 1	0.811	3.634
215455_at	TIMELESS	timeless circadian clock	0.811	2.676
209204_at	LMO4	LIM domain only 4	0.81	2.475
224755_at	TM9SF3	transmembrane 9 superfamily member 3	0.81	3.556
238907_at	ZNF780A	zinc finger protein 780A	0.81	2.076
221718_s_at	AKAP13	A-kinase anchoring protein 13	0.809	2.22
207286_at	CEP135	centrosomal protein 135	0.809	2.157
239214_at	LOC100130458	uncharacterized LOC100130458	0.809	2.984
204061_at	PRKX	protein kinase, X-linked	0.809	3.29
232021_at	GXYLT1	glucoside xylosyltransferase 1	0.808	2.201
217600_at	SCUBE3	signal peptide, CUB domain and EGF like domain containing 3	0.808	3.063
206958_s_at	UPF3A	UPF3 regulator of nonsense transcripts homolog A (yeast)	0.808	4.312
215758_x_at	ZNF93	zinc finger protein 93	0.808	2.635
227931_at	INO80D	INO80 complex subunit D	0.807	2.368
205689_at	PCNX2	pecanex homolog 2 (Drosophila)	0.807	2.19
203526_s_at	APC	APC, WNT signaling pathway regulator	0.806	2.444
224524_s_at	GPR75-ASB3///ASB3	GPR75-ASB3 readthrough///ankyrin repeat and SOCS box containing 3	0.806	4.196
222141_at	KLHL22	kelch like family member 22	0.806	2.415
218093_s_at	ANKRD10	ankyrin repeat domain 10	0.805	4.105
218782_s_at	ATAD2	ATPase family, AAA domain containing 2	0.804	2.843
213480_at	VAMP4	vesicle associated membrane protein 4	0.804	2.884
1557036_at	ZBTB1	zinc finger and BTB domain containing 1	0.804	2.492
212289_at	ANKRD12	ankyrin repeat domain 12	0.803	2.084
212414_s_at	GLYR1///SEPT6	glyoxylate reductase 1 homolog///septin 6	0.803	2.952
219028_at	HIPK2	homeodomain interacting protein kinase 2	0.803	2.212
203275_at	IRF2	interferon regulatory factor 2	0.803	2.31
241275_at	CAPZA1	capping actin protein of muscle Z-line alpha subunit 1	0.802	2.133
1570415_at	DDX52	DEAD-box helicase 52	0.802	2.583
203678_at	FAN1	FANCD2/FANCI-associated nuclease 1	0.802	3.155
222557_at	STMN3	stathmin 3	0.802	2.921
218585_s_at	DTL	denticleless E3 ubiquitin protein ligase homolog	0.801	2.366
201795_at	LBR	lamin B receptor	0.8	3.389
1555890_at	LOC101928605///OR2A1-AS1///OR2A9P///OR2A20P	uncharacterized LOC101928605///OR2A1 antisense RNA 1///olfactory receptor family 2 subfamily A member 9 pseudogene///olfactory receptor family 2 subfamily A member 20 pseudogene	0.8	2.11
227210_at	SFMBT2	Scm-like with four mbt domains 2	0.8	3.14
212994_at	THOC2	THO complex 2	0.8	3.366
1554769_at	ZNF785	zinc finger protein 785	0.8	2.523
222608_s_at	ANLN	anillin actin binding protein	0.799	2.958
240091_at	PSMA8	proteasome subunit alpha 8	0.799	2.315
224610_at	SNHG1///SNORD22///SNORD25///SNORD26///SNORD27///SNORD28///SNORD30///SNORD31///SNORD29	small nucleolar RNA host gene 1///small nucleolar RNA, C/D box 22///small nucleolar RNA, C/D box 25///small nucleolar RNA, C/D box 26///small nucleolar RNA, C/D box 27///small nucleolar RNA, C/D box 28///small nucleolar RNA, C/D box 30///small nucleolar RNA, C/D box 31///small nucleolar RNA, C/D box 29	0.799	2.97
235406_x_at	TMEM161B-AS1	TMEM161B antisense RNA 1	0.799	2.831
209112_at	CDKN1B	cyclin dependent kinase inhibitor 1B	0.798	3.284
223716_s_at	ZRANB2	zinc finger RANBP2-type containing 2	0.798	4.138
227091_at	CCDC146	coiled-coil domain containing 146	0.797	2.605
219390_at	FKBP14	FK506 binding protein 14	0.797	2.535
221213_s_at	LOC145783///ZNF280D	uncharacterized LOC145783///zinc finger protein 280D	0.797	2.483
221586_s_at	E2F5	E2F transcription factor 5	0.796	2.356
243201_at	RPL36A	ribosomal protein L36a	0.796	2.734
209430_at	BTAF1	B-TFIID TATA-box binding protein associated factor 1	0.795	3.543
206249_at	MAP3K13	mitogen-activated protein kinase kinase kinase 13	0.795	2.668
225127_at	TMEM181	transmembrane protein 181	0.795	3.545
244495_x_at	TMEM241	transmembrane protein 241	0.795	3.362
234975_at	GSPT1	G1 to S phase transition 1	0.794	3.001
225949_at	MIR6845///NRBP2	microRNA 6845///nuclear receptor binding protein 2	0.793	3.77
235195_at	FBXW2	F-box and WD repeat domain containing 2	0.792	2.728
212754_s_at	MON2	MON2 homolog, regulator of endosome-to-Golgi trafficking	0.792	2.866
219956_at	GALNT6	polypeptide N-acetylgalactosaminyltransferase 6	0.79	2.246
211452_x_at	LRRFIP1	LRR binding FLII interacting protein 1	0.79	3.864
202414_at	ERCC5	ERCC excision repair 5, endonuclease	0.789	3.389
225558_at	GIT2	GIT ArfGAP 2	0.789	2.417
204835_at	POLA1	DNA polymerase alpha 1, catalytic subunit	0.788	1.993
233642_s_at	HEATR5B	HEAT repeat containing 5B	0.787	2.113
238656_at	RAD50	RAD50 double strand break repair protein	0.787	2.481
235645_at	ESCO1	establishment of sister chromatid cohesion N-acetyltransferase 1	0.786	2.676
1552644_a_at	PHC3	polyhomeotic homolog 3	0.786	2.803
225813_at	RC3H2	ring finger and CCCH-type domains 2	0.786	2.109
206059_at	ZNF91	zinc finger protein 91	0.786	2.368
49452_at	ACACB	acetyl-CoA carboxylase beta	0.784	2.561
226140_s_at	OTUD1	OTU deubiquitinase 1	0.784	2.343
225570_at	SLC41A1	solute carrier family 41 member 1	0.784	2.024
238557_at	CHKB-AS1	CHKB antisense RNA 1 (head to head)	0.783	2.549
218136_s_at	SLC25A37	solute carrier family 25 member 37	0.783	2.053
1555086_at	STAT5B	signal transducer and activator of transcription 5B	0.783	3.198
1554029_a_at	TTC37	tetratricopeptide repeat domain 37	0.783	2.231
210539_at	TTLL5	tubulin tyrosine ligase like 5	0.783	3.311
1552564_at	NUDT9P1	nudix hydrolase 9 pseudogene 1	0.782	2.77
203831_at	R3HDM2	R3H domain containing 2	0.782	3.587
236079_at	LOC202025	uncharacterized LOC202025	0.781	2.598
212582_at	OSBPL8	oxysterol binding protein like 8	0.781	2.703
202503_s_at	KIAA0101	KIAA0101	0.78	2.563
205603_s_at	DIAPH2	diaphanous related formin 2	0.779	2.251
220369_at	PPP4R3A	protein phosphatase 4 regulatory subunit 3A	0.779	2.573
212946_at	VWA8	von Willebrand factor A domain containing 8	0.779	2.996
1557685_at	ASAP1-IT2	ASAP1 intronic transcript 2	0.778	3.298
1559616_x_at	ZNF626	zinc finger protein 626	0.778	3.022
1553694_a_at	PIK3C2A	phosphatidylinositol-4-phosphate 3-kinase catalytic subunit type 2 alpha	0.777	2.798
219981_x_at	ZNF587	zinc finger protein 587	0.777	2.813
238624_at	LOC102724517///NLK	uncharacterized LOC102724517///nemo like kinase	0.776	2.295
239824_s_at	TMEM107	transmembrane protein 107	0.776	3.779
232665_x_at	SMURF1	SMAD specific E3 ubiquitin protein ligase 1	0.775	3.097
1555944_at	FAM120A	family with sequence similarity 120A	0.774	2.379
211387_x_at	RNGTT	RNA guanylyltransferase and 5'-phosphatase	0.774	2.748
225237_s_at	MSI2	musashi RNA binding protein 2	0.773	2.84
1568801_at	VWA9	von Willebrand factor A domain containing 9	0.773	3.146
1553459_at	CCDC150	coiled-coil domain containing 150	0.772	2.22
1552347_at	CRYZL1	crystallin zeta like 1	0.772	3.114
209627_s_at	OSBPL3	oxysterol binding protein like 3	0.772	2.022
205267_at	POU2AF1	POU class 2 associating factor 1	0.772	3.597
1556319_at	TRIM44	tripartite motif containing 44	0.772	2.027
219437_s_at	ANKRD11	ankyrin repeat domain 11	0.771	3.914
225818_s_at	TBRG1	transforming growth factor beta regulator 1	0.771	3.621
203753_at	TCF4	transcription factor 4	0.771	2.458
223522_at	MIR600///MIR600HG	microRNA 600///MIR600 host gene	0.77	2.075
1560662_s_at	WHAMMP2///WHAMMP3	WAS protein homolog associated with actin, golgi membranes and microtubules pseudogene 2///WAS protein homolog associated with actin, golgi membranes and microtubules pseudogene 3	0.77	3.516
242900_at	ALG10B///ALG10	ALG10B, alpha-1,2-glucosyltransferase///ALG10, alpha-1,2-glucosyltransferase	0.769	3.117
212966_at	HIC2	hypermethylated in cancer 2	0.769	2.703
215889_at	SKIL	SKI-like proto-oncogene	0.769	3.33
242969_at	ZNF780B	zinc finger protein 780B	0.769	3.079
235281_x_at	AHNAK	AHNAK nucleoprotein	0.768	2.003
224833_at	ETS1	ETS proto-oncogene 1, transcription factor	0.768	2.656
231291_at	GIPR	gastric inhibitory polypeptide receptor	0.768	2.872
1553703_at	ZNF791	zinc finger protein 791	0.768	3.666
218628_at	CCDC53	coiled-coil domain containing 53	0.766	2
223218_s_at	NFKBIZ	NFKB inhibitor zeta	0.766	2.031
225499_at	RALGAPA2	Ral GTPase activating protein catalytic alpha subunit 2	0.766	3.313
207436_x_at	SORBS1	sorbin and SH3 domain containing 1	0.766	3.601
226426_at	ADNP	activity dependent neuroprotector homeobox	0.765	2.714
204552_at	INPP4A	inositol polyphosphate-4-phosphatase type I A	0.765	3.712
1565544_at	RNF141	ring finger protein 141	0.765	2.886
229886_at	C5orf34	chromosome 5 open reading frame 34	0.764	3.114
223298_s_at	NT5C3A	5'-nucleotidase, cytosolic IIIA	0.764	2.501
1569938_at	SIRT5	sirtuin 5	0.764	2.909
235826_at	LOC101928954	uncharacterized LOC101928954	0.763	2.379
217016_x_at	TMEM212	transmembrane protein 212	0.761	3.368
224994_at	CAMK2D	calcium/calmodulin dependent protein kinase II delta	0.76	2.751
236852_at	FBXO43	F-box protein 43	0.76	2.464
226762_at	MIR4657///PURB	microRNA 4657///purine rich element binding protein B	0.76	2.281
241685_x_at	PURA	purine rich element binding protein A	0.76	2.56
227925_at	ST3GAL4-AS1	ST3GAL4 antisense RNA 1 (head to head)	0.76	1.992
207719_x_at	CEP170P1///CEP170	centrosomal protein 170 pseudogene 1///centrosomal protein 170	0.759	3.568
201036_s_at	HADH	hydroxyacyl-CoA dehydrogenase	0.759	2.593
236043_at	LOC100130175///BBIP1	uncharacterized LOC100130175///BBSome interacting protein 1	0.759	2.348
206471_s_at	PLXNC1	plexin C1	0.758	2.65
213391_at	DPY19L4	dpy-19 like 4 (C. elegans)	0.757	2.578
209341_s_at	IKBKB	inhibitor of kappa light polypeptide gene enhancer in B-cells, kinase beta	0.757	3.389
215123_at	NPIPA5///NPIPB5///LOC613037///NPIPB4///NPIPB3	nuclear pore complex interacting protein family member A5///nuclear pore complex interacting protein family member B5///nuclear pore complex interacting protein member///nuclear pore complex interacting protein family member B4///nuclear pore complex interacting protein family member B3	0.757	2.241
235829_at	CAHM	colon adenocarcinoma hypermethylated (non-protein coding)	0.755	3.32
207339_s_at	LTB	lymphotoxin beta	0.755	2.28
235833_at	PPAT	phosphoribosyl pyrophosphate amidotransferase	0.755	3.238
223320_s_at	ABCB10	ATP binding cassette subfamily B member 10	0.754	3.609
204672_s_at	ANKRD6	ankyrin repeat domain 6	0.753	2.883
218306_s_at	HERC1	HECT and RLD domain containing E3 ubiquitin protein ligase family member 1	0.753	3.356
218179_s_at	TRAPPC11	trafficking protein particle complex 11	0.753	3.032
1558027_s_at	PRKAB2	protein kinase AMP-activated non-catalytic subunit beta 2	0.752	2.406
204510_at	CDC7	cell division cycle 7	0.751	2.397
220060_s_at	PARPBP	PARP1 binding protein	0.751	2.708
217792_at	SNX5	sorting nexin 5	0.751	2.904
226892_at	C10orf12	chromosome 10 open reading frame 12	0.749	3.053
232901_at	RARS2	arginyl-tRNA synthetase 2, mitochondrial	0.749	2.018
217885_at	IPO9	importin 9	0.748	3.104
1559957_a_at	LOC642852	uncharacterized LOC642852	0.748	2.637
227228_s_at	CCDC88C	coiled-coil domain containing 88C	0.746	2.917
241741_at	CRLS1	cardiolipin synthase 1	0.746	2.541
215645_at	FLCN	folliculin	0.745	3.131
213353_at	ABCA5	ATP binding cassette subfamily A member 5	0.744	2.23
218158_s_at	APPL1	adaptor protein, phosphotyrosine interacting with PH domain and leucine zipper 1	0.744	2.592
219842_at	ARL15	ADP ribosylation factor like GTPase 15	0.744	2.561
1555594_a_at	MBNL1	muscleblind like splicing regulator 1	0.744	2.807
208328_s_at	MEF2A	myocyte enhancer factor 2A	0.744	2.124
226465_s_at	SON	SON DNA binding protein	0.744	3.271
225409_at	COA5	cytochrome c oxidase assembly factor 5	0.743	2.814
232688_at	BMP2K	BMP2 inducible kinase	0.742	2.947
230628_at	EP400	E1A binding protein p400	0.742	2.789
1560928_at	LOC151657	uncharacterized LOC151657	0.742	3.088
226019_at	OMA1	OMA1 zinc metallopeptidase	0.742	2.549
225225_at	OIP5-AS1	OIP5 antisense RNA 1	0.741	3.597
203604_at	ZNF516	zinc finger protein 516	0.741	2.185
215307_at	ZNF529	zinc finger protein 529	0.741	2.531
53720_at	C19orf66	chromosome 19 open reading frame 66	0.74	3.423
228752_at	CRACR2A	calcium release activated channel regulator 2A	0.74	3.703
208709_s_at	NRDC	nardilysin convertase	0.74	3.647
235866_at	C9orf85	chromosome 9 open reading frame 85	0.739	3.329
219105_x_at	ORC6	origin recognition complex subunit 6	0.739	3.206
226596_x_at	UMAD1	UBAP1-MVB12-associated (UMA) domain containing 1	0.739	2.575
218138_at	MKKS	McKusick-Kaufman syndrome	0.738	2.786
1566207_at	TCEA1	transcription elongation factor A1	0.738	3.082
240637_at	WDR41	WD repeat domain 41	0.738	2.227
1558556_at	CAMK1	calcium/calmodulin dependent protein kinase I	0.736	2.048
211342_x_at	MED12	mediator complex subunit 12	0.736	2.757
1569330_at	STX18-AS1	STX18 antisense RNA 1 (head to head)	0.736	2.6
235697_at	ZNF544	zinc finger protein 544	0.736	2.933
209579_s_at	MBD4	methyl-CpG binding domain 4, DNA glycosylase	0.735	3.557
224106_at	NTMT1	N-terminal Xaa-Pro-Lys N-methyltransferase 1	0.735	2.993
213973_at	RRBP1	ribosome binding protein 1	0.735	3.228
213051_at	ZC3HAV1	zinc finger CCCH-type containing, antiviral 1	0.735	3.179
225393_at	GATAD2B	GATA zinc finger domain containing 2B	0.734	3.429
205699_at	MAP2K6	mitogen-activated protein kinase kinase 6	0.734	3.115
230917_at	PLCG2	phospholipase C gamma 2	0.734	3.12
233182_x_at	ATXN3	ataxin 3	0.733	2.805
1561292_at	LOC105370941	uncharacterized LOC105370941	0.733	2.216
200899_s_at	MGEA5	meningioma expressed antigen 5 (hyaluronidase)	0.733	2.344
223934_at	SP140L	SP140 nuclear body protein like	0.733	3.866
229173_at	LNPK	lunapark, ER junction formation factor	0.732	2.4
209766_at	PRDX3	peroxiredoxin 3	0.732	2.389
234042_at	TAS2R45///TAS2R43	taste 2 receptor member 45///taste 2 receptor member 43	0.732	2.002
230355_at	SEPT7P2	septin 7 pseudogene 2	0.731	2.619
240257_at	SYNJ2	synaptojanin 2	0.731	2.382
228513_at	TMEM219	transmembrane protein 219	0.731	2.329
221592_at	TBC1D8	TBC1 domain family member 8	0.73	2.058
218263_s_at	ZBED5	zinc finger BED-type containing 5	0.73	3.329
242970_at	DIP2B	disco interacting protein 2 homolog B	0.729	2.31
223085_at	RNF19A	ring finger protein 19A, RBR E3 ubiquitin protein ligase	0.729	3.525
210379_s_at	TLK1	tousled like kinase 1	0.729	2.591
208433_s_at	LRP8	LDL receptor related protein 8	0.728	2.711
1555884_at	PSMD6	proteasome 26S subunit, non-ATPase 6	0.728	3.065
228711_at	LOC101929740///ZNF37A	zinc finger protein 761-like///zinc finger protein 37A	0.727	2.41
203474_at	IQGAP2	IQ motif containing GTPase activating protein 2	0.726	3.366
240392_at	LOC105371920	uncharacterized LOC105371920	0.726	2.778
202082_s_at	SEC14L1	SEC14 like lipid binding 1	0.726	2.785
1556227_at	VCPIP1	valosin containing protein interacting protein 1	0.726	2.002
213784_at	IFT27	intraflagellar transport 27	0.725	2.729
223189_x_at	KMT2E	lysine methyltransferase 2E	0.725	3.447
235607_at	LOC101928963	uncharacterized LOC101928963	0.725	2.682
243283_at	CROT	carnitine O-octanoyltransferase	0.724	2.57
221782_at	DNAJC10	DnaJ heat shock protein family (Hsp40) member C10	0.724	2.147
210102_at	VWA5A	von Willebrand factor A domain containing 5A	0.724	2.548
209943_at	FBXL4	F-box and leucine rich repeat protein 4	0.723	2.741
211040_x_at	GTSE1	G2 and S-phase expressed 1	0.723	2.782
213776_at	LOC157562	uncharacterized LOC157562	0.723	2.907
1554237_at	SDCCAG8	serologically defined colon cancer antigen 8	0.723	2.227
224876_at	C5orf24	chromosome 5 open reading frame 24	0.722	2.969
222589_at	NLK	nemo like kinase	0.722	2.834
235511_at	RBM14-RBM4///RBM4	RBM14-RBM4 readthrough///RNA binding motif protein 4	0.722	2.636
1554470_s_at	ZBTB44	zinc finger and BTB domain containing 44	0.722	2.32
215359_x_at	LOC101060181///ZNF44	zinc finger protein ZnFP12///zinc finger protein 44	0.721	3.265
224810_s_at	ANKRD13A	ankyrin repeat domain 13A	0.72	2.955
226652_at	USP3	ubiquitin specific peptidase 3	0.719	3.126
212919_at	DCP2	decapping mRNA 2	0.718	2.471
226594_at	ENTPD5	ectonucleoside triphosphate diphosphohydrolase 5	0.717	3.304
1558041_a_at	KIAA0895L	KIAA0895 like	0.717	2.768
1570441_at	NAPB	NSF attachment protein beta	0.717	2.397
243792_x_at	PTPN13	protein tyrosine phosphatase, non-receptor type 13	0.717	3.211
222791_at	RSBN1	round spermatid basic protein 1	0.717	2.954
1568836_at	CLK4	CDC like kinase 4	0.716	2.373
1557129_a_at	FAM111B	family with sequence similarity 111 member B	0.716	2.178
238944_at	LOC100505715	uncharacterized LOC100505715	0.716	2.527
202822_at	LPP	LIM domain containing preferred translocation partner in lipoma	0.716	2.021
202301_s_at	RSRC2	arginine and serine rich coiled-coil 2	0.716	3.147
213253_at	SMC2	structural maintenance of chromosomes 2	0.716	2.203
205356_at	USP13	ubiquitin specific peptidase 13 (isopeptidase T-3)	0.716	2.391
1555852_at	PSMB8-AS1	PSMB8 antisense RNA 1 (head to head)	0.715	2.046
242706_s_at	MED23	mediator complex subunit 23	0.714	3.598
212801_at	MIR1178///CIT	microRNA 1178///citron rho-interacting serine/threonine kinase	0.714	2.584
218515_at	PAXBP1	PAX3 and PAX7 binding protein 1	0.714	3.063
219380_x_at	POLH	DNA polymerase eta	0.714	2.466
201660_at	ACSL3	acyl-CoA synthetase long-chain family member 3	0.713	2.11
208077_at	C9orf38	chromosome 9 open reading frame 38	0.713	2.555
233444_at	LOC101927620	uncharacterized LOC101927620	0.713	2.407
217420_s_at	POLR2A	RNA polymerase II subunit A	0.712	2.12
222629_at	REV1	REV1, DNA directed polymerase	0.712	2.799
223763_at	DTNBP1	dystrobrevin binding protein 1	0.711	2.554
228077_at	MRI1	methylthioribose-1-phosphate isomerase 1	0.711	3.124
218265_at	SECISBP2	SECIS binding protein 2	0.711	2.4
212777_at	SOS1	SOS Ras/Rac guanine nucleotide exchange factor 1	0.711	2.328
212721_at	SREK1	splicing regulatory glutamic acid and lysine rich protein 1	0.711	3.563
1558630_at	DLGAP4-AS1	DLGAP4 antisense RNA 1	0.71	2.459
1556808_at	RAP2A	RAP2A, member of RAS oncogene family	0.71	2.218
218067_s_at	ARGLU1	arginine and glutamate rich 1	0.709	3.401
225834_at	FAM72A///FAM72D///FAM72B///FAM72C	family with sequence similarity 72 member A///family with sequence similarity 72 member D///family with sequence similarity 72 member B///family with sequence similarity 72 member C	0.708	2.67
1553316_at	GPR82	G protein-coupled receptor 82	0.708	2.561
225048_at	PHF10	PHD finger protein 10	0.708	2.557
219961_s_at	KIZ	kizuna centrosomal protein	0.707	2.591
235572_at	SPC24	SPC24, NDC80 kinetochore complex component	0.707	2.215
204193_at	CHKB	choline kinase beta	0.706	3.025
220223_at	ATAD5	ATPase family, AAA domain containing 5	0.705	2.632
1558504_at	GTF2IP12	general transcription factor IIi pseudogene 12	0.704	3.566
1555872_a_at	LOC728903///GLIDR	uncharacterized LOC728903///glioblastoma down-regulated RNA	0.704	2.682
208021_s_at	RFC1	replication factor C subunit 1	0.704	3.286
212460_at	SPTSSA	serine palmitoyltransferase small subunit A	0.704	3.058
1558953_s_at	CEP164	centrosomal protein 164	0.703	2.864
203922_s_at	CYBB	cytochrome b-245 beta chain	0.703	2.179
219551_at	EAF2	ELL associated factor 2	0.703	2.17
1558458_at	LOC101928623///LOC401320	uncharacterized LOC101928623///uncharacterized LOC401320	0.703	2.57
220232_at	SCD5	stearoyl-CoA desaturase 5	0.703	2.174
214805_at	SNORD10///SNORA48///SNORA67///EIF4A1	small nucleolar RNA, C/D box 10///small nucleolar RNA, H/ACA box 48///small nucleolar RNA, H/ACA box 67///eukaryotic translation initiation factor 4A1	0.703	2.037
203836_s_at	MAP3K5	mitogen-activated protein kinase kinase kinase 5	0.702	3.227
230526_at	TNRC6C-AS1	TNRC6C antisense RNA 1	0.702	2.995
227548_at	ORMDL1	ORMDL sphingolipid biosynthesis regulator 1	0.701	2.176
225852_at	ANKRD17	ankyrin repeat domain 17	0.7	2.904
234464_s_at	EME1	essential meiotic structure-specific endonuclease 1	0.7	2.66
1559883_s_at	SAMHD1	SAM and HD domain containing deoxynucleoside triphosphate triphosphohydrolase 1	0.7	2.095
202102_s_at	BRD4	bromodomain containing 4	0.699	3.714
36888_at	HAUS5	HAUS augmin like complex subunit 5	0.699	3.374
208003_s_at	NFAT5	nuclear factor of activated T-cells 5	0.699	2.206
1554250_s_at	STAG3L2///STAG3L3///TRIM73	stromal antigen 3-like 2 (pseudogene)///stromal antigen 3-like 3 (pseudogene)///tripartite motif containing 73	0.699	2.605
203300_x_at	AP1S2	adaptor related protein complex 1 sigma 2 subunit	0.698	2.4
232449_at	BCO2	beta-carotene oxygenase 2	0.698	2.99
1553252_a_at	BRWD3	bromodomain and WD repeat domain containing 3	0.697	3.018
234733_s_at	FANCM	Fanconi anemia complementation group M	0.697	2.263
235428_at	MINCR	MYC-induced long noncoding RNA	0.697	2.215
242617_at	TMED8	transmembrane p24 trafficking protein family member 8	0.697	2.881
218146_at	GLT8D1	glycosyltransferase 8 domain containing 1	0.696	2.624
222427_s_at	LARS	leucyl-tRNA synthetase	0.696	3.503
1558784_at	LOC100133089	uncharacterized LOC100133089	0.696	3.335
225028_at	LINC01420	long intergenic non-protein coding RNA 1420	0.695	2.055
201853_s_at	CDC25B	cell division cycle 25B	0.694	2.518
215208_x_at	RPL35A	ribosomal protein L35a	0.694	2.546
1562442_a_at	SSBP1	single stranded DNA binding protein 1	0.694	2.267
1558560_s_at	BLZF1	basic leucine zipper nuclear factor 1	0.693	2.26
218518_at	FAM13B	family with sequence similarity 13 member B	0.693	3.178
229632_s_at	INTS10	integrator complex subunit 10	0.693	2.896
1555976_s_at	MYL12A	myosin light chain 12A	0.693	2.942
231399_at	RAB3IP	RAB3A interacting protein	0.693	2.145
219481_at	TTC13	tetratricopeptide repeat domain 13	0.693	2.702
1558648_at	C15orf57	chromosome 15 open reading frame 57	0.692	2.233
204791_at	NR2C1	nuclear receptor subfamily 2 group C member 1	0.692	3.537
[truncated: 3,340 more rows]
