# Supplementary material for: Transcriptome-Wide N6-Methyladenosine Alternations in Pulmonary Arteries of Monocrotaline-Induced Pulmonary Arterial Hypertension in Rats and Novel Therapeutic Targets
Source: Biomedicines. 2024 Feb 4;12(2):364. doi: 10.3390/biomedicines12020364 (PMC10886831; doi:10.3390/biomedicines12020364)
Supplement: Supplementary file 1 [file biomedicines-12-00364-s001.zip › Supplemental Table S6.xlsx]

## Sheet: Supplemental Table S6
intersection
KLHL24
CCNC
DDX60L
PDS5B
NEMF
BTAF1
CEP135
TRNT1
RSF1
KMT5B
SCML1
USPL1
LTV1
OSBPL8
ZNF137P
KDM6A
PRKD3
ANKRD36B
MBNL2
ANKRD36
CEP83
HEATR5B
BDP1
PARP8
GRK3
KMT2E
KNTC1
IDH1
RALGAPA2
XRCC5
XRN1
U2SURP
ATR
MTRF1L
LACC1
ZMYND11
TBL1XR1
ZGRF1
CHD9
ARFGEF2
ZNF33A
MASTL
TTC37
RFX3
NGDN
NUCB2
BRWD3
ZC3H13
KRR1
ACRC
IFI16
ZNF252P
ATP8A1
AHI1
DAAM1
ATM
SACS
SUZ12
ZNF292
RGPD2///RGPD6///RGPD8///RGPD3///RGPD1///RGPD4///RGPD5///RANBP2
GMPS
SLC4A7
WDHD1
FASTKD2
CEP350
ESCO1
ZNF302
TRPS1
HNRNPR
VPS13C
ATAD2
LTN1
SEC24D
CEP192
GSPT1
STRBP
MKI67
HNRNPA1
GRAMD3
SF3B1
AZI2
KBTBD2
SRSF11
KPNA1
RALGPS2
MYCBP2
CENPF
BIRC6
MAN1A2
DOCK9
VEZT
RICTOR
SMC4
LRPPRC
FAM135A
ANLN
DMTF1
CRYBG3
ZNF148
TPP2
UTRN
NASP
NKTR
CEP295
ANKRD17
FAM214A
ZMYM2
SESTD1
SEC62
ANKIB1
COPB1
PATJ
SKIL
HLTF
ZNF700
RECQL
MLLT3
HOOK3
REV3L
WAC
MPHOSPH9
ZNF91
RAD50
GALNT3
CMAHP
CCP110
DHX36
ZNF83
MORF4L2
RNF19A
ZFP62
PHIP
SMCHD1
IL6ST
JAK2
PRPF4B
RUFY3
KIAA0368
CAPRIN2
NIN
PGM2L1
NRIP1
RIOK3
SETX
CEP152
BRWD1
ADD3
CCDC88A
PARP14
RAB3IP
AKAP9
ASH1L
NAA25
JAK1
PCNX1
APC
TPR
CCDC14
MKLN1
HBS1L
ZNF782
AQR
KNL1
THUMPD3
FNBP4
NFAT5
EXOC4
RASA2
CHD2
CNTRL
VPS13B
MYSM1
ZBTB1
RGS5
RFX7
SLC16A7
HECTD1
WHSC1L1
SAMD9L
LRRK2
ZFYVE16
ALMS1
SOS1
PNN
SMC1A
SMC3
JPX
NFX1
MED23
DOCK10
DNAJC7
CPNE3
IVNS1ABP
NRDC
ZNF493
ITPR2
PRKDC
C1GALT1
ZAK
MALAT1
FAM208B
PCF11
PRRC2C
ZCCHC6
TGFBR1
FAM65B
API5
CEP290
ZNF780B
ZNF451
ADAM17
PHF20L1
CHD7
POLK
MTHFD2L
MKL2
SMC2
CCDC93
ZNF791
SDCCAG8
ODF2L
2023-03-07
RAB11FIP2
GEN1
DNAJC13
PNISR
BAZ2B
C10orf12
FBXO11
TRIM44
NFKBIZ
SMC6
PRKAA1
RASEF
NUP58
PBRM1
CEP128
SCAF11
CLHC1
CWF19L2
PTCD3
SNX25
TRIO
MON2
QSER1
NCOA2
RBM41
ZNF84
FNIP1
KIF23
AKAP13
REV1
EIF3M
RAP1GDS1
STRN
SRSF4
ERBIN
IQGAP1
EIF2AK2
DLG1
LOC100131541
DMXL1
PTBP2
PIK3C2A
RHOQ
CWC27
ELF2
SLTM
RNPC3
VPS26A
ATP8B1
TCEA1
ZNF117
IL1A
CENPC
MBD4
TRIM38
GRAMD1C
CCNT2
ZNHIT6
ZNF12
VPS13D
KIDINS220
ACSL4
OFD1
PPWD1
HNRNPH1
USP34
FMR1
IWS1
RLF
ZFC3H1
MAP9
L3MBTL3
GAPT
DNAJC2
TM9SF3
ATG2B
UGP2
MBNL1
DZIP3
GCLC
NPC1
BRIP1
VPS13A
TBC1D8B
CKAP2
TSR1
CAND1
FAM13B
NLN
KMT2C
HELZ
PRPF40A
2023-09-02
ZBTB41
ZNF277
SOS2
OXR1
STXBP4
ARID2
MTDH
G2E3
ZNF75A
LGALS8
RBM25
SON
ZNF440
TOP2A
MGA
FAM111B
KLHL8
UBR5
FANCI
LUC7L3
CLINT1
ZDBF2
UBR1
SAMSN1
ZNF721
IDI1
ZNF92
MAP3K13
DST
CLOCK
HEATR1
CCDC146
ASPM
KTN1
UFL1
AIM2
CSE1L
SLC39A10
PAXBP1
STAG1
CFAP44
PSMD6
KANSL1L
SEC63
TTC17
SYNE1
NCOA7
USP25
CEP57
NUP153
TLK1
DOCK8
USP32
TRIP12
RBM39
HIBCH
TMF1
ACSL3
DNAJC10
BOD1L1
MTM1
C8orf44-SGK3///SGK3
EDRF1
CCDC18
CENPJ
PIK3C3
RBBP6
FRYL
ZRANB2
PUS10
ANKRD12
CYBB
YTHDC1
PELI1
GOLGA4
CHD8
ZNF654
NIPBL
FAR1
KDM3A
RAPGEF6
DNAJB14
HERC1
SP100
FARSB
PFKFB2
ALCAM
FKBP14
KIAA1109
PTPN2
LRRCC1
MACF1
PTPRC
USP13
DICER1
PHF3
ZNF107
SREK1
ERGIC2
INTS7
TRIM33
KDM4C
PKN2
RFC1
PRR14L
UBR2
TFRC
RB1
AFF4
MND1
TROVE2
DOCK11
RSRC2
CTNNB1
DOPEY1
IFNGR1
LRRFIP1
EZH2
ZNF518A
RAPGEF2
LINC00597
BBX
TMEM87A
RAPGEF5
PCM1
KAT6A
ZRANB3
EED
NCOA3
SYNE2
NUFIP2
MIS18BP1
OSBP
PHKB
CASP4
STIL
RABGAP1L
GGNBP2
GTF3C3
ZNF594
HNRNPA2B1
ZNF160
CLIP1
PHF6
TAF1D
HSDL2
FAM111A
ACAP2
DDX52
AKAP11
KDM7A
LARS
RBAK
JMJD1C
IQGAP2
PRPF38B
RIF1
ARID5B
ZNF431
NSUN6
MYO9A
LAMC1
IREB2
RANBP2
EDEM3
TRAPPC11
PTPN13
BLZF1
POLA1
ANKRD28
ZNF334
ZNF106
ATRX
THOC2
SCFD1
ZNF266
BRCA2
GDAP2
NAA15
TAOK1
IFT80
CNOT2
SAMD9
ARHGAP42
ERV3-1
SAR1B
PPP2R3C
MAP3K2
DIAPH2
CCNL1
MDM2
