# Supplementary material for: Transcriptome-Wide N6-Methyladenosine Alternations in Pulmonary Arteries of Monocrotaline-Induced Pulmonary Arterial Hypertension in Rats and Novel Therapeutic Targets
Source: Biomedicines. 2024 Feb 4;12(2):364. doi: 10.3390/biomedicines12020364 (PMC10886831; doi:10.3390/biomedicines12020364)
Supplement: Supplementary file 1 [file biomedicines-12-00364-s001.zip › Supplemental Table S7.xlsx]

## Sheet: Supplemental Table S7
intersection
MFSD5
RAB11B
ARPC4-TTLL3///ARPC4
NRSN2
NR1H2
ALKBH2
PLLP
YIPF3
ID1
POLR2L
DNASE2
NR2F2
UCK1
CAPG
AJUBA
ODF3B
STARD10
C12orf10
GPR157
RAB7A
COPE
MAL
PRKCDBP
KDELR1
ABHD17A
VPS72
CD82
SLC25A11
TEX261
XCL1
EDN1
RAC2
MPDU1
MDK
NR2F6
COX8A
SCARB1
EMD
RNF26
GPER1
PPP1CA
APH1A
SLC15A3
POLR2E
PKIG
GPS1
IL32
LSM3
RNH1
MRPL43
PTCH1
C6orf136
ORAI1
TMEM229B
CHTF8
SLC29A1
TMEM53
TMEM204
CX3CR1
POLDIP3
HIF3A
CYGB
CORO1A
METTL26
VIPR1
KLHDC3
SMAD7
CCL5
CYHR1
HDHD3
ZFPL1
TM7SF2
SGK223
ARMC7
RHBDD2
BCKDHA
C1orf198
CD1C
TMEM222
ADRB1
VPS51
LSP1
MFNG
SLC39A13
SNX12
ST6GALNAC6
MFSD10
B3GAT3
WFS1
CPNE2
NDUFS7
SH2D3C
PDGFA
PHPT1
NRN1
FAM189A2
CDC34
TNFRSF14
DNAL4
CRIP1
YIF1A
UBL7
PLA2G4C
NKG7
PEX10
EHD3
CYSTM1
ISLR
IL2RB
JUND
PKN1
SCAMP3
PEF1
RCE1
FAM89B
CCDC3
PRR5L
C10orf10
TRAPPC1
FSCN1
CA4
DAG1
AP1S3
GRAP
TCEA2
TBCB
TMEM37
APOC1
LTBP4
CNPPD1
PTMS
DCAKD
SEPW1
CAMK2N1
COMT
RNF5P1///RNF5
THAP7
RHOG
LTBP3
ADIRF
DOCK6
FAM127A
PRUNE1
CCL19
